# Supplementary material for: Molecular Mapping and Analysis of an Excellent Quantitative Trait Loci Conferring Adult-Plant Resistance to Stripe Rust in Chinese Wheat Landrace Gaoxianguangtoumai
Source: Frontiers journal article supplement (doi:10.3389/fpls.2021.756557), 2021-10-12
Supplement: Data_Sheet_1.xlsx [file Data_Sheet_1.xlsx]

## Sheet: Supplementary Table S1
Supplementary Table S1. Bioparents and 249 RILs from Gaoxianguangtoumai (GX) × Taichung 29 (TC 29) for final disease severity (FDS) against stripe rust evaluated among three years during 2018 to 2020 and BLUP values.
No.	CZ2018_FDS	CZ2019_FDS	CZ2020_FDS	BLUP_FDS
GX	5	6.66667	5	7.06192
TC 29	80	80	80	73.22
1	56.6667	40	46.6667	44.586
2	0	1.66667	0	2.6184
3	1.66667	5	20	10.0243
4	1.66667	5	5	5.58075
5	1.66667	1.66667	1.66667	3.60783
6	0	23.3333	0	9.03485
7	0	0	0	2.12369
8	93.3333	86.6667	100	85.0694
9	0	0	0	2.12369
10	1.66667	0	1.66667	3.11312
11	0	0	1.66667	2.6184
12	0	0	1.66667	2.6184
13	3.33333	1.66667	0	3.60487
14	100	80	80	79.1447
15	6.66667	5	3.33333	6.56721
16	0	16.6667	66.6667	26.8119
17	5	1.66667	3.33333	5.08604
18	5	11.6667	33.3333	16.9354
19	0	0	3.33333	3.11015
20	8.33333	11.6667	5	9.52956
21	1.66667	0	5	4.09958
22	13.3333	0	1.66667	6.56721
23	1.66667	1.66667	5	4.59429
24	1.66667	0	10	5.58075
25	0	0	0	2.12369
26	0	0	0	2.12369
27	53.3333	60	66.6667	55.4459
28	1.66667	3.33333	0	3.60487
29	0	0	0	2.12369
30	21.6667	3.33333	0	9.52956
31	0	0	0	2.12369
32	0	0	0	2.12369
33	0	6.66667	8.33333	6.56721
34	33.3333	20	33.3333	27.7954
35	1.66667	0	0	2.6184
36	20	3.33333	1.66667	9.52956
37	1.66667	0	1.66667	3.11312
38	80	86.6667	100	81.1206
39	5	6.66667	30	14.4678
40	80	73.3333	73.3333	69.2682
41	55	80	80	65.8141
42	3.33333	3.33333	0	4.09662
43	0	1.66667	0	2.6184
44	0	1.66667	0	2.6184
45	3.33333	1.66667	0	3.60487
46	0	0	0	2.12369
47	0	3.33333	21.6667	9.52956
48	3.33333	0	5	4.59133
49	5	1.66667	0	4.09958
50	0	3.33333	10	6.0725
51	73.3333	53.3333	66.6667	59.3947
52	5	0	0	3.60487
53	1.66667	0	1.66667	3.11312
54	100	86.6667	100	87.0453
55	0	0	0	2.12369
56	60	43.3333	35	43.1018
57	1.66667	0	0	2.6184
58	0	0	1.66667	2.6184
59	5	8.33333	10	9.03485
60	100	100	100	90.9941
61	1.66667	6.66667	0	4.59429
62	5	3.33333	0	4.59133
63	0	0	0	2.12369
64	100	73.3333	80	77.1688
65	5	0	5	5.08604
66	0	0	0	2.12369
67	13.3333	0	0	6.0725
68	0	0	0	2.12369
69	50	21.6667	40	35.2042
70	0	0	0	2.12369
71	0	0	0	2.12369
72	16.6667	13.3333	6.66667	12.9866
73	20	16.6667	40	24.836
74	0	35	60	30.266
75	3.33333	5	0	4.59133
76	0	0	1.66667	2.6184
77	0	0	1.66667	2.6184
78	0	0	0	2.12369
79	0	0	0	2.12369
80	80	28.3333	100	63.8383
81	10	1.66667	5	7.06192
82	41.6667	15	1.66667	19.406
83	55	100	100	77.6635
84	80	86.6667	100	81.1206
85	5	5	8.33333	7.55367
86	0	0	0	2.12369
87	100	93.3333	100	89.0182
88	93.3333	93.3333	100	87.0423
89	20	30	30	25.8225
90	1.66667	33.3333	6.66667	14.4678
91	0	0	0	2.12369
92	0	3.33333	0	3.11015
93	0	3.33333	5	4.59133
94	3.33333	20	5	10.516
95	8.33333	13.3333	5	10.0213
96	0	0	0	2.12369
97	0	0	0	2.12369
98	100	100	80	85.0694
99	6.66667	0	1.66667	4.59429
100	3.33333	0	0	3.11015
101	10	0	3.33333	6.0725
102	0	6.66667	1.66667	4.59429
103	0	0	0	2.12369
104	0	0	1.66667	2.6184
105	3.33333	43.3333	13.3333	19.8948
106	21.6667	30	46.6667	31.2554
107	40	16.6667	16.6667	23.8495
108	0	0	0	2.12369
109	0	0	0	2.12369
110	50	26.6667	0	24.836
111	86.6667	73.3333	100	79.1447
112	3.33333	3.33333	5	5.57779
113	3.33333	26.6667	55	27.3036
114	28.3333	3.33333	6.66667	13.4784
115	6.66667	6.66667	30	14.9625
116	5	3.33333	10	7.55367
117	1.66667	16.6667	25	14.9625
118	5	3.33333	6.66667	6.56721
119	1.66667	0	0	2.6184
120	0	0	0	2.12369
121	1.66667	3.33333	6.66667	5.58075
122	20	13.3333	5	13.4784
123	0	0	0	2.12369
124	0	0	0	2.12369
125	0	0	0	2.12369
126	13.3333	0	5	7.55367
127	28.3333	15	10	17.9219
128	3.33333	0	0	3.11015
129	1.66667	3.33333	5	5.08604
130	1.66667	1.66667	3.33333	4.09958
131	3.33333	6.66667	3.33333	6.0725
132	3.33333	1.66667	5	5.08604
133	28.3333	1.66667	5	12.4919
134	0	0	5	3.60487
135	1.66667	3.33333	1.66667	4.09958
136	10	6.66667	5	8.5431
137	3.33333	3.33333	0	4.09662
138	8.33333	6.66667	40	18.4166
139	0	0	3.33333	3.11015
140	5	6.66667	5	7.06192
141	1.66667	0	1.66667	3.11312
142	6.66667	0	0	4.09958
143	28.3333	1.66667	3.33333	11.9972
144	3.33333	10	1.66667	6.56721
145	5	3.33333	1.66667	5.08604
146	0	0	0	2.12369
147	1.66667	0	8.33333	5.08604
148	0	0	1.66667	2.6184
149	0	5	6.66667	5.58075
150	15	73.3333	26.6667	36.1907
151	0	0	5	3.60487
152	0	0	0	2.12369
153	0	1.66667	8.33333	5.08604
154	0	1.66667	5	4.09958
155	0	0	0	2.12369
156	8.33333	1.66667	20	11.0107
157	10	1.66667	5	7.06192
158	0	0	0	2.12369
159	8.33333	21.6667	28.3333	19.4031
160	5	1.66667	5	5.58075
161	0	0	0	2.12369
162	0	1.66667	10	5.58075
163	0	1.66667	0	2.6184
164	13.3333	6.66667	20	13.9731
165	5	3.33333	26.6667	12.4919
166	1.66667	0	1.66667	3.11312
167	0	0	0	2.12369
168	10	0	26.6667	12.9866
169	12.5	5	1.66667	7.80251
170	0	3.33333	0	3.11015
171	3.33333	0	0	3.11015
172	73.3333	15	10	31.2524
173	1.66667	0	1.66667	3.11312
174	50	5	33.3333	28.2901
175	1.66667	3.33333	23.3333	10.516
176	66.6667	55	26.6667	46.0671
177	0	0	1.66667	2.6184
178	0	1.66667	3.33333	3.60487
179	0	30	0	11.0107
180	0	0	0	2.12369
181	40	36.6667	73.3333	46.5589
182	18.3333	1.66667	11.6667	11.5054
183	8.33333	10	5	9.03485
184	66.6667	42.5	20	40.3883
185	1.66667	1.66667	0	3.11312
186	3.33333	0	0	3.11015
187	0	1.66667	26.6667	10.519
188	1.66667	13.3333	0	6.56721
189	5	3.33333	6.66667	6.56721
190	1.66667	3.33333	5	5.08604
191	26.6667	3.33333	40	22.8601
192	0	0	0	2.12369
193	0	0	0	2.12369
194	100	73.3333	100	83.0935
195	0	0	0	2.12369
196	1.66667	1.66667	5	4.59429
197	3.33333	0	0	3.11015
198	5	3.33333	5	6.0725
199	0	1.66667	5	4.09958
200	1.66667	0	0	2.6184
201	0	0	0	2.12369
202	0	3.33333	5	4.59133
203	1.66667	0	1.66667	3.11312
204	0	0	1.66667	2.6184
205	20	3.33333	40	20.8842
206	1.66667	30	10	14.4678
207	1.66667	1.66667	3.33333	4.09958
208	0	5	5	5.08604
209	70	3.33333	5	25.3278
210	0	0	0	2.12369
211	0	0	0	2.12369
212	1.66667	0	0	2.6184
213	3.33333	5	6.66667	6.56721
214	0	1.66667	5	4.09958
215	0	1.66667	0	2.6184
216	0	5	5	5.08604
217	36.6667	80	80	60.3842
218	40	6.66667	11.6667	19.406
219	13.3333	8.33333	0	8.54014
220	0	1.66667	6.66667	4.59429
221	25	3.33333	5	11.9972
222	5	5	43.3333	17.9219
223	11.6667	5	5	8.5431
224	6.66667	5	0	5.58075
225	40	16.6667	73.3333	40.6342
226	60	61.6667	100	67.79
227	66.6667	56.6667	93.3333	66.3089
228	0	0	0	2.12369
229	3.33333	26.6667	26.6667	18.9113
230	11.6667	0	8.33333	8.04839
231	10	0	0	5.08604
232	1.66667	1.66667	0	3.11312
233	13.3333	6.66667	46.6667	21.8737
234	5	60	5	22.8601
235	1.66667	5	5	5.58075
236	0	0	0	2.12369
237	0	0	0	2.12369
238	0	0	0	2.12369
239	20	1.66667	11.6667	12.0002
240	0	0	0	2.12369
241	0	0	6.66667	4.09958
242	41.6667	66.6667	43.3333	47.0536
243	1.66667	3.33333	5	5.08604
244	0	1.66667	40	14.4678
245	35	26.6667	0	20.3925
246	6.66667	5	16.6667	10.519
247	3.33333	0	0	3.11015
248	0	0	5	3.60487
249	16.6667	3.33333	46.6667	21.8737

## Sheet: Supplementary Table S2
Supplementary Table S2. Pearson's correlation coefficients for final disease severity (FDS) against stripe rust evaluated among three environments during 2018 to 2020 and BLUP values.
	CZ2018	CZ2019	CZ2020	BLUP
CZ2018	1
CZ2019	0.84**	1
CZ2020	0.82**	0.86**	1
BLUP	0.94**	0.95**	0.95**	1

## Sheet: Supplementary Table S3
Supplementary Table S3. The genotype and mapping data for the 117 RILs from Gaoxianguangtoumai (GX) × Taichung 29 (TC 29).
Marker	Linkage groups	Poision (cM)	1	2	4	6	11	13	14	15	16	18	20	23	27	29	31	34	36	38	41	42	43	48	50	51	53	54	56	58	59	60	63	64	66	69	72	74	75	76	77	80	82	87	89	91	94	97	98
AX-109292832	1	0	A	B	B	B	A	A	A	A	A	A	X	A	A	A	A	B	X	X	A	B	A	A	A	B	A	B	X	X	A	X	B	B	B	X	B	A	A	A	A	A	B	B	A	B	B	B	B
AX-109629373	1	0.994	A	B	B	X	A	A	A	A	A	A	X	A	A	A	A	B	X	X	A	B	A	A	A	B	A	B	X	A	A	X	B	B	B	B	B	A	A	A	A	A	B	B	A	B	B	B	B
AX-110440018	1	1.589	X	B	B	X	A	A	A	A	A	A	X	A	A	A	A	B	X	X	A	B	A	A	A	B	A	B	X	X	A	B	B	B	B	B	B	A	A	A	A	A	B	B	A	B	B	B	B
AX-109281991	1	6.151	A	B	B	B	A	A	A	A	A	A	X	A	A	A	A	B	X	X	A	B	A	X	A	A	A	B	B	B	A	B	B	B	B	X	B	A	A	A	B	A	B	A	A	B	B	B	B
AX-110987479	1	6.951	A	B	B	X	A	A	A	A	A	A	X	A	A	A	A	B	X	X	A	B	A	X	A	A	A	B	B	B	A	B	B	B	B	B	B	A	A	A	B	A	B	A	A	B	B	B	B
AX-111656593	1	9.185	A	B	B	B	A	A	A	A	A	A	X	A	A	A	A	B	X	X	A	B	A	X	A	A	A	B	B	B	A	B	B	B	B	X	B	A	A	A	B	A	B	A	A	B	B	B	B
AX-108804089	1	9.754	A	B	B	X	A	A	A	A	A	A	X	A	A	A	A	B	A	X	A	B	A	X	A	A	A	B	B	B	A	B	B	B	B	X	B	A	A	A	B	A	B	A	A	B	B	B	B
AX-110910898	1	9.981	A	B	X	X	A	A	A	A	A	A	X	A	A	A	A	B	X	X	A	B	A	X	A	A	A	B	B	B	A	B	B	B	B	X	B	A	A	A	B	A	B	A	A	B	B	B	B
AX-111066745	1	10.226	A	B	X	X	A	A	A	A	A	A	X	A	A	A	A	B	X	X	A	B	A	X	A	A	A	B	B	B	A	B	B	B	B	X	B	A	A	A	B	A	B	A	A	X	B	B	B
AX-110460472	1	10.797	A	B	X	A	A	A	A	A	A	A	A	A	A	A	A	B	A	A	A	B	A	X	A	A	A	B	B	B	A	B	B	B	B	B	B	B	A	A	B	A	B	A	A	X	B	B	B
AX-110090502	1	11.582	A	B	X	X	A	A	A	A	A	A	A	A	A	A	A	B	X	X	A	B	A	X	A	A	A	B	B	B	A	B	B	B	B	B	B	B	A	A	B	A	B	A	A	B	B	A	B
AX-110563049	1	12.136	A	B	X	A	A	A	A	A	A	A	X	A	A	A	A	B	A	X	A	B	A	A	A	A	A	B	X	B	A	B	B	B	B	B	B	B	A	A	B	A	B	A	A	X	B	A	B
AX-108756149	1	13.183	A	B	X	A	A	A	A	A	A	A	A	A	A	A	A	B	X	X	A	B	A	X	A	A	A	B	B	B	A	X	B	B	B	B	B	B	A	A	B	A	B	A	A	X	B	A	B
AX-108770405	1	17.764	A	B	X	X	A	A	A	A	A	A	X	A	A	A	A	B	X	X	A	B	A	A	A	A	A	B	B	B	A	X	B	B	B	B	B	B	A	A	B	A	B	B	A	B	B	A	B
AX-110361744	1	18.415	A	B	X	B	A	A	A	A	A	A	B	A	A	A	A	B	X	X	A	B	A	A	A	A	A	B	B	B	A	X	B	B	B	B	B	B	A	A	B	A	B	B	A	B	B	A	B
AX-109511562	1	20.652	A	B	B	B	A	A	A	A	A	B	B	A	B	A	A	B	B	B	A	B	A	A	A	A	A	B	B	B	A	A	B	B	B	B	B	B	A	A	B	A	B	B	A	B	B	A	B
AX-109428041	1	21.937	A	B	X	X	A	A	A	A	A	B	B	A	X	A	A	B	X	X	A	B	A	B	A	A	A	B	B	B	A	A	B	B	B	B	B	X	A	A	B	A	B	B	A	B	B	A	A
AX-111670056	1	24.195	A	B	X	B	A	A	A	A	A	A	B	A	B	A	A	X	X	X	A	B	A	B	A	A	A	B	B	B	A	A	B	B	B	B	A	X	A	A	B	A	B	B	A	B	B	A	A
AX-110567377	1	24.717	A	B	X	A	A	A	A	A	A	A	B	A	X	A	A	X	A	X	A	B	A	B	A	A	A	B	B	B	A	A	B	B	B	B	A	X	A	A	B	A	B	B	A	B	B	A	A
AX-108789085	1	29.554	A	B	X	X	A	A	B	A	A	A	X	A	X	A	A	A	B	X	A	B	A	B	A	A	A	A	B	B	B	A	B	B	B	B	A	X	A	X	B	A	B	B	A	B	B	A	A
AX-110362870	1	31.125	A	B	X	X	A	A	B	A	A	A	A	A	X	B	B	X	B	X	A	B	A	B	A	A	A	A	B	B	B	A	B	B	B	B	A	B	A	X	B	A	B	B	A	B	B	A	B
AX-110992290	1	31.309	A	A	X	B	A	A	B	X	A	A	A	A	X	B	B	A	B	X	A	B	A	B	A	A	A	A	B	B	B	A	B	B	B	B	A	B	A	B	B	A	B	B	A	B	B	A	B
AX-110145423	1	31.81	A	B	X	B	A	A	B	X	A	A	A	A	X	B	B	A	B	X	A	B	A	B	A	A	A	A	B	B	B	A	B	B	B	B	A	B	A	X	B	A	B	B	A	B	B	A	A
AX-110370077	1	32.399	X	B	X	B	A	A	B	A	A	A	X	A	B	B	A	A	B	B	A	B	A	B	X	A	A	A	B	B	B	A	B	B	B	B	A	B	A	B	B	A	B	B	A	B	B	A	A
AX-111015470	1	33.023	A	B	X	B	A	A	B	A	A	A	A	A	X	B	B	A	B	X	A	B	A	B	A	A	A	A	B	B	B	A	B	B	B	B	A	B	A	X	B	A	B	B	A	B	B	A	A
AX-108821529	1	33.418	A	B	X	X	A	A	B	X	A	A	A	A	X	B	B	A	B	X	A	B	A	B	A	A	A	A	B	B	B	A	B	B	B	B	A	X	A	X	B	A	B	B	A	B	B	A	A
AX-108953018	1	36.973	A	A	X	B	A	A	B	A	A	A	A	A	B	B	B	A	B	X	A	B	A	B	A	A	A	A	B	B	B	A	B	A	A	X	A	A	A	B	B	A	B	B	A	B	B	A	B
AX-111484839	1	38.233	A	A	B	X	A	A	B	A	A	A	A	A	X	B	B	A	B	X	A	B	A	B	A	A	A	A	B	A	B	A	B	A	A	X	A	A	A	X	B	A	B	B	A	B	B	A	A
AX-108892304	1	38.392	A	A	X	X	A	A	B	A	A	A	A	A	X	B	B	A	B	X	A	B	A	B	A	A	A	A	B	X	B	A	B	A	A	X	A	A	A	X	B	A	B	B	A	B	B	A	A
AX-109819835	1	38.771	A	A	B	B	A	A	B	A	A	A	A	A	B	B	B	X	A	B	A	B	A	B	A	A	A	A	B	X	B	A	B	B	A	X	A	X	A	B	B	A	B	B	A	B	B	A	A
AX-109954487	1	42.584	A	A	X	X	A	A	B	A	A	A	A	A	X	B	A	A	A	X	A	B	A	B	A	A	A	A	B	A	B	A	B	A	A	X	A	A	A	X	B	A	B	B	A	B	B	A	A
AX-108899745	1	43.147	A	A	X	X	A	A	B	A	A	A	A	A	B	B	A	X	A	X	A	B	A	B	A	A	A	A	B	X	B	A	B	B	A	A	A	A	A	X	B	A	B	B	A	B	B	A	A
AX-109959060	1	43.495	A	A	X	X	A	A	B	A	A	A	A	A	B	B	A	X	A	X	A	B	A	B	A	A	A	A	B	B	B	A	B	B	A	X	A	A	A	B	B	A	B	B	X	B	B	A	A
AX-89530267	1	46.097	B	A	B	A	A	A	B	A	A	A	A	A	X	B	A	X	A	A	A	B	A	B	A	A	A	A	B	X	B	X	B	B	A	A	A	A	A	B	B	A	B	B	X	B	B	A	A
AX-109481746	1	48.641	B	A	B	A	A	A	A	A	A	A	X	A	B	B	A	X	A	A	A	A	A	B	A	A	A	A	X	A	B	A	B	B	A	A	A	A	A	B	B	A	B	B	X	B	B	A	B
AX-111082528	1	49.119	B	A	B	A	A	A	A	A	A	A	X	A	X	B	A	X	A	A	A	A	A	B	A	A	A	A	B	A	B	A	B	B	A	A	A	A	A	B	B	A	B	B	X	B	B	A	B
AX-110476734	1	49.921	B	A	B	A	A	A	A	A	B	A	X	A	X	B	A	X	A	A	A	A	A	B	A	A	A	A	B	X	B	A	B	B	A	A	A	A	A	X	B	A	B	B	X	B	B	A	B
AX-110917687	1	50.2	B	A	B	A	A	A	A	A	B	A	X	A	B	B	A	X	A	A	A	A	B	B	A	A	A	A	B	A	B	A	B	B	A	A	A	A	A	X	B	A	B	B	X	B	B	A	B
AX-108777813	1	51.34	B	A	B	A	A	A	A	A	B	A	A	A	X	B	A	B	A	A	A	A	B	B	A	A	A	A	B	A	B	A	B	B	A	A	A	A	A	X	B	A	B	B	X	B	B	A	B
AX-109424288	1	53.468	B	A	B	X	A	A	A	A	B	A	X	A	X	B	A	B	A	B	A	A	B	B	A	A	A	A	B	A	B	A	B	B	A	A	A	A	A	B	B	A	B	B	X	B	B	B	B
AX-109432159	1	53.82	B	A	X	A	A	A	A	A	B	A	X	A	X	B	A	B	A	B	A	A	B	B	A	A	A	A	B	A	B	A	B	B	A	A	A	A	A	B	B	A	B	B	B	B	B	B	B
AX-109333238	1	54.272	B	A	X	A	A	A	A	A	B	A	X	A	X	B	A	B	A	B	A	A	B	B	A	A	A	A	B	A	B	A	B	B	B	A	A	A	A	B	B	X	B	B	X	B	B	B	B
AX-108954549	1	54.664	B	A	X	A	A	A	A	A	B	A	X	A	X	B	A	B	A	B	A	A	B	B	A	A	A	A	B	A	B	A	B	B	X	A	A	A	A	X	B	A	B	B	X	X	B	B	B
AX-108868172	1	55.068	B	A	X	X	A	A	A	A	B	A	X	A	A	B	A	B	A	B	A	A	B	B	A	A	A	A	B	A	B	A	B	B	B	A	A	A	A	B	B	A	B	B	X	B	B	B	B
AX-111578749	1	55.618	B	A	X	B	A	A	A	A	B	A	X	A	X	B	A	B	A	B	A	A	B	B	A	A	A	A	B	A	B	A	B	B	B	A	A	A	A	B	B	A	B	B	X	B	B	B	B
AX-110532052	1	56.588	X	A	X	X	A	A	A	A	B	A	X	A	A	B	A	B	A	B	A	A	B	B	A	A	A	A	B	A	B	A	B	B	B	A	A	A	A	B	B	A	B	B	X	B	B	B	B
AX-111013535	1	56.913	B	A	X	X	A	A	A	A	B	A	X	A	A	B	A	B	A	B	A	A	B	B	A	A	A	A	B	A	B	A	B	B	B	A	A	A	A	X	B	A	B	B	X	B	B	B	B
AX-109414216	1	59.603	B	A	A	X	A	A	A	A	B	A	B	B	A	B	A	B	A	B	A	A	B	B	B	A	A	A	B	A	B	A	B	B	B	A	A	A	A	X	B	A	B	B	X	B	B	B	B
AX-108845780	1	60.241	B	A	A	X	A	A	A	A	B	A	B	B	A	B	A	B	A	B	A	A	B	B	B	A	A	A	B	A	B	A	B	B	B	A	A	A	A	X	B	A	B	B	B	B	B	B	B
AX-109031299	1	62.128	B	A	A	X	A	A	A	A	B	A	X	B	A	B	A	B	A	B	A	A	B	B	B	A	A	A	X	B	X	A	B	B	B	A	A	A	A	X	B	A	B	B	X	B	B	B	B
AX-110913585	1	63.045	B	A	A	X	A	A	A	A	B	A	X	B	A	B	A	B	A	B	A	A	B	B	B	A	A	A	B	B	B	A	B	B	B	A	A	X	A	X	B	A	B	B	B	B	B	B	B
AX-108728065	1	63.825	B	A	A	X	A	A	A	A	B	X	B	B	A	B	A	B	A	B	A	A	A	B	B	A	A	A	B	B	B	A	B	B	B	A	A	A	A	X	B	A	B	B	X	B	B	B	B
AX-109375456	1	64.063	B	A	A	X	A	A	A	A	B	X	B	B	A	B	A	B	A	B	A	A	A	B	B	A	A	A	B	B	B	A	B	B	B	A	A	A	A	X	B	A	B	B	X	X	B	B	B
AX-111588753	1	64.848	X	A	A	X	A	A	A	A	B	B	X	A	A	B	A	B	A	B	A	A	A	B	B	A	A	A	B	B	B	A	B	B	X	A	A	A	A	B	B	A	B	B	X	B	B	B	B
AX-109848476	1	65.707	B	A	A	X	A	A	A	A	B	B	X	A	A	A	A	B	A	B	A	A	A	B	B	A	A	A	B	B	B	A	B	B	X	A	A	A	A	X	B	A	B	B	X	X	B	B	B
AX-111484345	1	66.777	B	A	A	X	A	A	A	A	B	B	X	A	A	A	A	B	A	B	A	A	A	B	B	A	A	A	B	B	B	A	B	B	B	A	A	A	B	B	B	A	B	B	X	B	B	B	B
AX-111135532	1	67.55	B	A	A	X	A	B	A	A	B	B	X	A	A	A	A	B	A	B	A	A	A	B	B	A	A	A	B	B	B	A	B	B	B	A	A	A	B	X	B	A	B	B	X	B	B	B	B
AX-109949764	1	68.174	B	A	A	X	A	B	A	A	B	B	X	A	A	A	A	B	B	B	A	A	A	B	B	A	A	A	B	B	B	A	B	B	B	A	A	A	B	B	B	A	B	B	X	B	B	B	B
AX-89527966	1	68.663	B	A	A	X	A	B	A	A	B	B	X	A	A	A	A	B	B	B	A	A	A	B	B	A	A	A	B	B	B	A	B	B	B	A	A	A	B	X	B	A	B	B	X	B	B	B	B
AX-109932769	1	69.232	B	A	A	X	A	B	A	A	B	B	B	A	A	A	A	B	B	B	A	A	A	B	B	A	A	A	B	B	B	A	B	B	B	A	A	A	B	B	B	A	B	B	X	B	B	B	B
AX-110548430	1	69.79	B	A	A	X	A	B	A	A	B	B	X	A	A	A	A	B	B	B	A	A	A	B	B	A	A	A	B	B	B	B	B	B	B	A	A	A	B	B	B	A	B	B	X	B	B	B	B
AX-108920635	1	71.2	B	A	A	X	A	B	A	A	B	B	X	A	A	A	A	B	B	B	A	A	A	B	B	A	A	A	X	B	B	B	B	B	X	A	A	A	B	X	B	A	B	B	X	X	B	A	B
AX-109626482	1	71.85	B	A	A	X	A	B	A	A	B	B	X	A	A	A	A	B	B	B	A	B	A	B	B	A	A	A	B	B	B	B	B	B	B	A	A	A	B	X	B	A	B	B	B	B	B	A	B
AX-111118068	1	73.065	B	A	A	A	A	B	A	A	B	B	X	A	A	A	A	B	B	B	A	B	A	B	B	A	A	A	X	B	B	B	B	B	B	A	B	A	B	X	B	A	B	B	X	B	B	A	B
AX-110546430	1	73.291	B	A	A	A	A	B	A	A	B	B	B	A	A	A	A	B	B	B	A	B	A	B	B	A	A	A	B	B	B	B	B	A	B	A	B	A	B	B	B	A	B	B	B	X	B	A	B
AX-108814409	1	74.834	B	A	A	A	A	B	A	A	B	B	X	A	A	A	A	B	B	B	A	B	A	B	B	A	A	A	B	B	B	B	X	A	A	A	B	A	B	B	B	A	B	B	A	B	B	A	B
AX-110995984	1	77.876	B	B	A	X	A	B	A	A	B	B	X	A	A	A	A	B	B	X	B	B	A	B	X	A	A	A	X	X	X	B	B	A	A	A	B	A	B	B	B	A	B	B	A	X	B	B	B
AX-108824021	1	79.824	B	B	A	X	A	B	A	A	B	B	X	A	A	A	B	B	B	B	B	B	A	B	B	A	A	A	B	B	B	B	B	A	A	A	B	A	B	B	B	A	B	B	A	B	B	B	B
AX-109994140	1	81.862	B	B	A	B	A	B	A	A	B	B	B	A	A	A	B	B	B	B	B	B	A	B	B	A	B	A	B	B	B	B	A	A	A	A	B	A	B	B	B	A	X	B	A	X	B	B	B
AX-111064559	1	85.472	B	B	A	X	A	B	A	A	B	B	X	B	A	A	B	B	A	B	B	B	A	B	B	A	B	B	B	B	A	B	A	A	A	A	X	A	B	B	B	A	X	B	A	X	B	B	B
AX-110674338	1	85.823	B	B	A	X	A	B	A	A	B	B	X	B	A	A	B	B	A	B	B	B	A	B	B	A	B	B	B	B	A	B	A	A	A	A	X	A	B	B	B	A	A	B	A	X	B	B	B
AX-110595454	1	86.332	B	B	A	X	A	B	A	A	B	B	X	B	A	A	B	B	A	B	B	B	A	B	B	A	B	B	B	B	A	B	A	A	A	A	X	A	B	B	B	A	A	B	A	A	B	B	B
AX-111054747	1	87.007	B	B	A	X	A	B	A	A	B	B	X	B	A	A	B	B	A	B	B	B	A	B	B	A	B	B	B	B	A	B	A	A	A	A	X	A	B	B	B	A	A	B	A	A	B	B	B
AX-110471077	1	90.238	B	B	A	X	A	B	B	A	X	B	B	B	A	A	B	B	A	B	B	B	A	B	B	A	B	B	B	B	A	B	B	A	A	A	B	A	B	A	B	A	B	B	A	X	B	B	B
AX-108762060	1	90.28	B	B	A	X	A	B	B	A	X	B	B	B	A	A	B	B	A	B	B	B	A	B	B	A	B	B	X	B	A	B	B	A	A	A	B	A	B	A	B	A	B	B	A	A	B	B	B
AX-110980965	1	90.324	B	B	A	X	A	B	B	A	X	B	B	B	A	A	B	B	A	B	B	B	A	B	B	A	B	B	X	B	A	B	B	A	A	A	B	A	B	A	B	A	B	B	A	X	B	B	B
AX-111479453	1	90.33	B	B	A	X	A	B	B	A	X	B	B	B	A	A	B	B	A	B	B	B	A	B	B	A	B	B	B	B	A	B	B	A	A	A	B	A	B	A	B	A	B	B	A	A	B	B	B
AX-111065926	1	90.356	B	B	A	X	A	B	B	A	X	B	X	B	A	A	B	B	A	B	B	B	A	B	B	A	B	B	B	B	A	B	B	A	A	A	B	A	B	A	B	A	B	B	A	A	B	B	B
AX-109094916	1	90.747	B	B	A	X	A	B	B	A	X	B	B	B	A	A	B	B	A	B	B	B	A	B	B	A	B	B	B	B	A	B	B	A	A	A	B	A	B	A	B	A	B	B	A	A	B	B	B
AX-109580770	1	91.207	B	B	A	X	A	B	B	A	X	B	B	B	A	A	B	B	A	B	B	B	A	B	B	A	B	B	B	B	A	B	B	A	A	A	B	A	B	A	B	A	B	B	A	X	B	B	B
AX-110379520	1	91.687	B	B	A	X	A	B	B	A	X	B	B	B	A	A	B	B	A	B	B	B	A	B	B	A	B	B	B	B	A	B	B	A	A	A	B	X	B	A	B	A	B	B	A	A	B	B	B
AX-109530053	1	92.055	B	B	A	B	A	B	B	A	X	B	B	B	A	A	B	B	A	B	B	B	A	B	B	A	B	B	B	B	A	B	B	X	A	A	B	A	B	A	B	A	B	B	A	X	B	B	B
AX-110966780	1	94.59	B	B	A	X	A	B	B	A	X	B	B	B	A	A	B	B	A	B	B	B	A	B	B	A	B	B	B	B	A	B	B	A	A	A	B	A	B	A	A	A	A	B	A	A	B	B	A
AX-110095330	1	95.027	B	B	A	X	A	B	B	A	X	B	B	B	A	A	B	B	A	B	B	B	A	B	B	A	B	B	B	B	A	B	B	A	A	A	B	A	B	A	A	A	A	B	A	A	B	B	A
AX-110363276	1	95.701	B	B	A	X	A	B	B	A	X	B	B	B	A	A	B	B	A	B	B	B	A	B	B	A	B	B	B	B	A	B	B	A	A	A	B	A	B	A	A	A	A	B	B	A	B	B	A
AX-111028735	1	96.605	B	B	B	B	A	B	B	A	B	A	B	B	A	A	X	B	A	B	B	B	A	B	X	A	B	B	B	B	A	B	B	A	A	A	B	A	B	A	A	A	A	B	B	A	B	B	A
AX-108982790	1	105.368	B	B	B	B	B	B	B	A	X	A	B	B	X	A	X	X	A	B	B	B	A	B	B	A	B	A	B	X	A	B	B	A	A	B	B	A	B	A	A	A	A	B	A	X	B	B	B
AX-111450961	1	107.719	B	B	B	B	B	B	B	A	X	A	B	B	A	B	X	B	A	B	B	B	A	B	B	A	B	A	B	A	A	B	B	A	A	B	B	A	B	A	A	A	A	B	A	B	B	B	B
AX-108856649	1	108.215	B	B	B	B	B	B	B	A	X	A	B	B	A	B	X	B	A	B	B	B	A	B	B	A	B	A	B	A	A	B	B	A	A	B	B	A	B	A	A	A	A	B	A	B	B	B	B
AX-111063077	1	109.593	B	B	B	B	B	B	B	A	X	A	B	B	X	B	X	B	A	B	B	B	A	B	B	A	B	A	B	A	A	B	B	A	A	B	B	A	A	A	A	A	X	B	A	B	B	B	B
AX-109472062	1	115.511	B	B	B	B	B	B	A	A	X	A	B	B	X	B	B	X	A	B	X	B	B	B	B	A	B	A	B	A	X	B	B	A	A	B	B	A	A	A	A	A	X	B	X	A	B	B	B
AX-111458485	1	117.186	B	B	B	B	B	B	A	A	B	A	B	B	X	A	A	B	A	B	A	B	X	B	B	A	B	A	B	A	A	B	B	A	B	B	B	X	A	A	A	A	X	A	A	B	B	B	B
AX-108795974	1	117.518	B	B	B	B	B	B	A	A	B	A	B	B	X	A	A	B	A	B	X	B	B	B	B	A	B	A	B	A	X	B	B	A	B	B	B	B	A	A	A	A	X	A	X	B	B	X	B
AX-89714803	1	117.674	B	B	B	B	B	B	A	A	B	A	B	B	X	A	A	B	A	B	X	B	B	B	B	A	B	A	B	A	X	B	B	A	X	B	B	B	A	A	A	A	X	A	X	B	B	B	B
AX-110488387	1	118.01	B	B	B	B	B	B	A	A	B	A	B	B	B	A	A	B	A	B	X	B	B	B	B	A	B	A	B	A	X	B	B	A	X	B	B	B	A	A	A	A	B	A	X	B	B	B	B
AX-111537835	1	118.821	B	B	B	B	B	B	A	A	B	A	B	B	B	A	A	B	A	B	X	B	B	B	B	A	B	A	B	A	X	B	B	A	X	B	B	B	A	A	A	A	X	A	X	X	B	B	B
AX-109297339	1	119.054	B	B	B	B	B	B	A	A	B	A	B	B	X	A	A	B	A	B	X	B	B	B	B	A	B	A	B	A	X	B	B	A	A	B	B	B	A	A	A	A	X	A	X	B	B	B	B
AX-111476496	1	119.602	B	B	B	B	B	B	A	A	B	A	B	B	X	A	A	X	A	B	A	B	B	B	B	A	B	A	B	A	X	B	B	A	A	B	B	B	A	A	A	A	X	A	X	X	B	B	B
AX-109958813	1	121.234	B	B	B	B	B	B	A	A	A	A	B	B	X	A	B	X	A	B	A	B	X	B	X	A	B	A	B	A	A	B	B	A	A	X	B	A	A	A	A	A	X	B	A	A	B	A	B
AX-109346246	1	121.796	X	B	B	B	B	B	A	A	A	A	B	B	A	A	B	A	A	B	A	B	X	B	X	A	B	A	B	A	A	B	B	A	A	B	B	X	A	A	A	A	A	A	A	A	B	X	B
AX-111216460	1	129.746	B	B	B	B	B	B	A	B	B	A	X	B	X	A	A	X	A	B	X	B	X	B	B	B	B	A	B	A	X	B	B	A	X	B	B	B	A	A	A	A	X	A	A	B	B	A	B
AX-110610940	1	130.242	B	B	B	B	B	B	A	B	B	A	B	B	X	A	A	X	A	B	X	B	B	B	B	B	B	A	B	A	X	B	B	A	B	B	B	B	A	A	A	A	X	A	A	B	B	A	B
AX-111799412	1	133.373	B	B	X	B	B	B	A	B	B	A	B	B	X	A	A	B	A	B	A	A	B	B	B	B	B	A	B	A	A	B	B	A	B	B	A	B	A	A	A	A	X	A	A	B	B	A	B
AX-110037941	1	137.294	B	B	X	B	B	B	A	B	B	A	B	A	X	A	A	X	A	B	A	A	X	B	B	B	B	A	B	A	X	B	B	A	B	B	A	B	A	B	A	B	X	A	X	B	B	A	B
AX-111578537	1	137.685	B	B	X	B	B	B	A	B	B	A	B	A	B	A	A	A	A	B	A	A	B	B	B	B	B	A	B	A	X	B	B	A	B	B	A	B	A	B	A	B	X	A	A	B	B	A	B
AX-109456390	2	0	B	B	B	A	A	A	B	B	A	A	A	B	B	A	B	A	X	A	A	B	A	B	A	A	A	B	X	A	A	B	A	B	A	A	A	A	A	A	A	A	A	A	A	A	A	A	A
AX-110494639	2	6.279	B	B	B	B	A	A	B	B	A	A	A	B	B	A	B	B	X	A	A	B	A	B	B	A	A	B	A	X	A	B	A	B	A	A	A	A	A	A	A	A	A	A	A	A	A	A	A
AX-109403395	2	8.216	B	B	B	B	A	A	B	B	A	A	A	B	B	A	B	B	X	A	A	B	A	B	B	A	A	B	A	B	A	B	A	B	A	A	A	A	A	A	A	A	A	A	A	A	A	A	A
AX-111252533	2	8.96	B	B	B	B	A	A	B	B	A	A	A	B	B	A	B	B	X	A	A	B	A	B	B	A	A	B	A	X	A	B	A	B	A	A	A	A	A	A	A	A	A	A	A	A	A	A	A
AX-110020077	2	9.366	B	B	B	B	A	A	B	B	A	A	A	B	B	A	B	B	X	A	A	B	A	B	B	A	A	B	A	B	A	B	A	B	A	A	A	A	A	A	A	A	A	A	A	A	A	A	A
AX-110495582	2	13.296	B	B	B	B	A	A	B	B	X	A	A	B	B	X	B	B	B	X	A	B	A	B	B	A	B	B	A	B	A	B	A	B	A	A	A	A	A	A	A	A	A	A	A	A	A	A	A
AX-109878201	2	13.943	B	B	B	B	A	A	B	B	X	A	A	B	B	X	B	B	B	X	A	B	A	B	B	A	B	A	A	B	A	B	A	A	A	A	A	A	A	A	A	A	A	A	A	A	A	A	A
AX-110590728	2	14.866	B	B	B	B	A	A	B	B	X	A	A	B	B	A	A	B	X	X	A	B	A	B	B	A	B	A	A	X	A	B	A	A	A	A	A	A	A	A	A	A	A	A	A	A	A	A	A
AX-110041248	2	15.707	B	B	B	B	A	A	B	B	X	A	A	B	B	A	A	B	X	X	A	B	A	B	B	A	B	A	A	B	A	B	A	A	A	A	A	A	A	A	A	A	A	A	A	A	A	A	A
AX-111619113	2	19.105	B	A	B	B	B	A	B	B	B	A	B	B	B	X	A	X	B	B	A	B	A	B	B	A	B	B	B	B	A	B	A	X	A	A	A	A	A	A	A	A	A	A	A	X	A	A	A
AX-110402488	2	20.905	B	A	B	B	B	A	B	B	X	A	X	B	B	A	A	A	B	B	A	B	A	B	B	A	B	A	X	B	A	B	A	A	A	A	A	A	A	A	A	A	A	A	A	A	A	A	A
AX-108822354	2	21.5	B	A	B	B	B	A	B	B	A	A	X	B	B	X	A	X	B	B	A	B	A	B	B	A	B	B	B	X	A	B	A	B	A	A	A	A	A	A	A	A	A	A	A	A	A	A	A
AX-109041231	2	24.51	B	A	B	B	B	A	B	B	A	A	X	B	B	A	A	X	B	B	A	B	A	B	B	A	B	X	X	X	A	B	A	B	A	A	A	A	A	A	A	A	A	A	A	X	A	A	A
AX-111453144	2	25.284	B	A	B	B	B	A	B	B	A	A	X	B	B	A	A	X	B	B	A	B	A	B	B	A	B	B	X	X	A	B	A	B	A	A	A	A	A	A	A	A	A	A	A	X	A	A	A
AX-111673850	2	26.047	B	A	B	X	B	A	B	B	X	A	X	B	B	A	A	A	B	B	A	B	A	B	B	A	B	A	X	B	A	B	A	A	A	A	A	A	A	A	A	A	A	A	A	B	A	A	A
AX-108959612	2	27.852	B	A	B	X	A	A	B	B	A	A	X	B	B	X	A	A	B	B	A	B	A	B	B	A	B	A	X	X	A	B	A	A	A	A	A	A	B	A	A	A	A	B	A	B	A	A	A
AX-109310461	2	28.494	B	A	B	B	A	A	B	B	B	A	X	B	B	X	A	A	B	B	A	B	A	B	B	A	B	A	X	X	A	B	A	A	A	X	A	A	B	A	A	A	A	B	A	X	A	A	A
AX-110600183	2	29.221	B	A	B	B	A	A	B	B	B	A	X	B	B	X	A	A	B	B	A	B	A	B	B	A	B	B	X	B	A	B	A	B	A	X	A	A	B	A	A	A	A	B	A	B	A	A	A
AX-111004954	2	29.949	B	A	B	B	A	A	B	B	B	A	X	B	B	A	A	A	B	B	A	B	A	B	B	A	B	A	X	B	A	B	A	A	A	X	A	A	B	A	A	A	A	B	A	X	A	A	A
AX-109071394	2	30.254	B	A	B	B	X	A	B	B	B	A	X	B	B	A	A	A	B	B	A	B	A	B	B	A	B	A	B	B	A	B	A	A	A	X	A	A	B	A	A	A	A	B	A	B	A	A	A
AX-111535597	2	30.663	B	A	B	B	A	A	B	B	B	A	X	B	B	A	A	X	B	B	A	B	A	B	X	A	B	B	X	X	A	B	A	B	A	X	A	A	B	A	A	A	A	B	A	X	A	A	A
AX-109604511	2	31.507	B	A	B	B	A	A	B	B	B	A	X	B	B	A	A	X	B	B	A	B	A	B	B	A	B	B	X	X	A	A	A	B	A	X	A	A	B	A	A	A	A	B	A	X	A	A	A
AX-109308080	2	31.845	B	A	B	B	A	A	B	B	B	A	X	B	B	X	A	A	B	B	A	B	A	B	B	A	B	A	B	B	A	A	A	A	A	B	A	A	B	A	A	A	A	B	A	B	A	A	A
AX-110945834	2	32.452	B	A	B	B	A	A	B	B	B	A	X	B	B	X	A	A	B	B	A	B	A	B	B	A	B	A	X	B	A	A	A	A	A	B	A	A	B	A	A	A	A	B	A	X	A	A	A
AX-108775434	2	37.374	B	A	B	B	A	A	B	B	B	A	X	B	B	A	A	A	B	B	A	X	A	B	B	A	B	B	X	X	A	A	A	B	A	X	A	A	B	A	A	A	A	B	A	B	A	A	A
AX-110591681	2	40.41	B	A	B	B	A	A	B	B	B	A	X	B	B	X	A	A	B	B	A	B	A	B	B	A	B	A	B	B	A	B	A	A	A	B	A	A	B	A	B	A	A	B	A	B	A	A	A
AX-89457039	2	41.403	B	A	B	B	A	A	B	B	B	A	X	B	B	X	A	X	B	B	A	X	A	B	B	A	B	B	B	X	A	X	A	B	A	X	A	A	B	A	B	A	A	B	A	X	A	A	B
AX-110465138	2	43.903	B	A	B	X	A	A	B	B	A	B	A	B	B	A	A	A	B	B	A	X	A	B	B	A	B	X	A	B	A	A	A	X	A	X	A	A	B	A	X	A	A	B	A	X	A	X	B
AX-108979484	2	44.748	B	A	B	B	A	A	B	B	A	B	A	B	B	A	A	A	B	B	A	X	A	B	B	A	B	B	X	B	A	X	A	B	A	X	A	A	B	A	X	A	A	B	A	X	A	X	B
AX-109975702	2	45.504	B	A	B	B	A	A	B	B	A	A	X	B	B	A	A	X	B	B	A	X	A	B	B	A	B	B	X	B	A	X	A	B	A	X	A	A	B	A	B	A	A	B	A	X	A	X	B
AX-111039704	2	45.859	B	A	B	B	A	A	B	B	A	B	X	B	B	A	A	X	B	B	A	X	A	B	B	A	B	B	X	B	A	X	A	B	A	X	A	A	B	A	B	A	A	B	A	B	A	X	B
AX-110464799	2	47.436	B	A	B	X	B	A	B	B	A	A	A	B	B	A	A	A	B	B	A	X	A	B	B	A	B	B	X	B	A	X	A	B	A	X	A	A	A	A	X	A	A	B	A	X	A	X	B
AX-109601516	2	48.784	B	A	B	B	B	A	B	B	A	A	X	A	B	A	A	A	B	B	A	X	A	B	B	A	B	B	X	B	A	X	A	B	A	X	A	A	A	A	B	A	A	B	A	X	A	X	B
AX-108743944	2	51.555	A	A	B	X	B	A	B	B	A	A	X	A	B	A	A	X	B	B	A	X	A	B	B	A	B	B	X	B	A	X	A	B	A	X	A	A	A	A	X	A	A	B	A	X	A	X	B
AX-108890587	2	52.468	A	A	B	X	B	A	B	B	A	A	A	A	B	A	A	A	B	B	A	X	A	B	B	A	B	B	A	B	A	A	A	B	A	X	A	A	A	A	X	A	A	B	A	X	A	A	B
AX-111001918	2	58.53	A	A	B	B	B	A	B	B	A	A	A	A	A	A	A	A	B	B	A	B	A	B	B	A	B	B	X	B	A	X	B	B	A	X	A	A	A	A	B	A	A	B	A	B	A	B	B
AX-109429445	2	58.946	A	A	B	B	B	A	B	B	A	A	A	A	A	A	A	X	B	B	A	B	A	B	B	A	B	B	X	B	A	X	B	B	A	X	A	A	A	A	B	A	A	B	A	X	A	X	B
AX-110688811	2	59.57	A	A	B	B	B	B	B	B	A	A	A	A	A	A	A	A	B	B	A	B	A	B	B	A	B	B	X	B	A	X	B	B	A	X	A	A	A	A	B	A	A	B	A	B	A	X	B
AX-108745860	2	60.469	A	A	B	X	B	B	B	B	A	A	A	A	A	A	A	A	B	B	A	B	A	B	B	A	B	B	X	B	A	X	B	B	A	X	A	A	A	A	X	A	A	B	A	X	A	X	B
AX-109854640	2	61.288	A	A	B	X	B	B	B	B	A	A	A	A	A	A	A	A	B	B	A	B	A	B	B	A	B	B	X	B	A	A	B	B	A	X	A	A	A	A	X	A	A	B	A	X	A	X	B
AX-109352881	2	62.284	A	A	B	B	B	B	B	B	A	A	A	A	A	A	A	A	B	B	A	B	A	B	B	A	B	A	X	B	A	X	B	A	A	X	A	A	A	A	X	A	A	B	A	B	A	X	A
AX-111007758	2	63.755	A	A	B	X	B	B	B	B	A	A	A	A	A	A	A	B	B	B	A	B	A	B	B	A	B	A	X	B	A	X	B	B	A	X	A	A	A	A	B	A	A	B	A	B	A	A	B
AX-110386460	2	64.764	A	A	B	B	B	B	B	B	A	A	A	A	A	A	A	X	B	B	A	B	A	B	B	A	B	A	B	B	A	X	B	X	A	X	A	A	A	A	B	A	A	B	A	B	A	A	A
AX-109355688	2	69.146	A	A	B	B	B	B	B	B	A	A	A	A	A	A	A	X	B	B	A	B	A	B	B	A	B	A	B	B	A	X	B	X	A	X	A	A	A	A	B	A	A	B	B	B	A	A	A
AX-110945360	2	69.69	A	A	B	B	B	B	B	B	A	A	A	A	A	A	A	X	B	B	A	B	A	B	B	A	B	A	B	B	A	X	B	X	A	X	A	A	A	A	B	A	A	B	B	B	A	A	A
AX-110581042	2	70.484	A	A	B	B	B	B	B	B	A	A	A	A	A	A	A	B	B	B	A	B	A	B	B	A	B	A	B	B	A	X	B	B	A	X	A	A	A	A	X	A	A	B	B	B	A	A	B
AX-111216487	2	72.202	A	X	B	B	B	B	B	B	A	A	A	A	B	A	A	B	B	B	A	B	A	B	B	A	B	A	B	B	A	X	B	X	A	X	A	A	A	A	B	A	X	B	B	B	A	A	A
AX-110666954	2	74.111	A	A	A	B	B	B	B	B	A	A	A	A	B	A	A	X	B	B	A	B	A	B	B	A	B	A	B	B	A	X	B	A	A	X	A	A	A	A	B	A	B	B	B	B	A	A	B
AX-111621910	2	74.495	A	A	A	B	B	B	B	B	A	A	A	A	B	A	A	B	B	B	A	B	A	B	B	A	B	A	B	B	A	X	B	B	A	X	A	A	A	A	B	A	B	B	B	B	A	A	B
AX-109319313	2	75.203	A	X	A	B	B	B	B	B	A	A	A	A	B	A	A	B	B	B	A	B	A	B	B	A	B	A	B	B	A	X	B	B	A	B	A	A	A	A	B	A	B	B	B	B	A	A	B
AX-109482958	2	75.702	A	X	A	B	B	B	B	B	A	A	A	A	B	A	A	B	B	B	A	B	A	B	B	A	B	A	B	B	A	X	B	B	A	X	A	A	A	A	B	A	A	B	B	B	A	A	B
AX-108874388	2	77.789	A	X	A	B	B	B	B	B	A	A	A	A	B	A	A	B	B	B	A	B	A	B	B	A	B	B	B	B	A	X	B	B	A	B	A	A	A	A	B	A	B	B	B	B	A	A	B
AX-108822840	2	79.019	A	X	A	B	B	B	B	B	A	A	A	A	B	A	A	B	B	B	A	B	A	B	B	A	B	B	B	B	A	X	B	B	A	X	A	A	A	A	B	A	A	B	B	X	A	A	B
AX-110915670	2	93.141	A	B	X	B	A	B	A	X	A	A	A	A	B	A	A	A	A	X	A	B	B	B	B	A	X	A	X	B	B	B	B	B	A	X	A	A	A	A	B	A	A	A	X	B	B	A	B
AX-111047000	2	93.705	A	X	X	B	A	B	A	A	A	A	A	A	B	A	A	A	A	B	A	B	B	B	B	A	X	A	B	B	B	B	B	B	A	X	A	A	A	A	X	A	A	A	X	B	A	A	B
AX-111540680	2	95.332	A	X	X	B	A	B	A	A	A	A	A	A	B	A	A	A	A	B	A	B	B	B	B	A	X	A	X	B	B	B	B	B	A	X	A	A	A	A	X	A	A	A	B	B	A	A	B
AX-111064112	2	98.823	B	B	X	B	A	B	X	A	X	A	A	A	X	A	A	A	A	B	A	B	B	B	B	A	B	A	B	B	B	X	B	B	A	X	A	A	A	A	X	A	A	A	X	B	B	A	B
AX-108726041	2	125.544	A	A	X	A	A	B	X	A	B	A	A	B	B	B	A	A	X	X	A	A	A	B	A	A	X	X	B	X	A	B	A	B	A	B	X	B	A	A	B	A	B	A	A	X	B	A	B
AX-109350463	2	134.056	B	A	B	A	A	B	X	A	B	A	A	B	B	B	A	A	X	X	A	A	A	B	A	B	X	A	A	X	A	B	A	B	A	B	B	B	A	B	B	A	B	A	A	X	B	A	A
AX-110020417	2	136.123	B	A	X	A	A	B	X	A	B	A	A	B	B	B	A	A	X	X	A	A	A	B	A	B	X	A	A	A	A	B	A	B	A	B	B	X	A	B	B	A	B	A	A	X	B	A	A
AX-109414218	2	139.71	B	A	X	A	A	B	A	A	B	A	A	B	B	B	A	A	X	X	A	A	A	B	A	B	X	A	B	X	A	B	A	B	A	B	B	B	A	B	B	A	B	A	A	X	B	A	A
AX-111104551	2	140.352	B	A	X	A	A	B	A	A	B	A	A	B	B	B	A	A	X	X	A	A	A	B	A	B	X	A	B	X	A	B	A	B	A	B	B	B	A	B	B	A	B	A	A	A	B	A	A
AX-111471952	2	145.732	B	A	A	A	A	B	A	A	B	A	A	B	B	B	A	A	X	X	A	A	B	B	A	B	A	A	B	X	A	X	A	B	A	B	B	B	A	B	B	A	B	A	A	X	B	B	A
AX-111126182	2	149.966	B	A	A	A	A	B	A	A	B	A	A	B	B	B	A	X	B	X	A	A	X	B	A	A	B	A	B	B	A	B	A	B	A	B	B	B	A	B	B	B	B	A	A	B	B	B	A
AX-110366236	3	0	X	A	A	A	B	A	B	X	A	A	A	B	X	B	X	B	B	A	X	A	B	A	A	B	A	X	A	A	A	A	A	A	B	A	B	A	A	A	A	A	X	A	X	X	B	B	A
AX-110942989	3	1.154	B	A	B	A	B	A	B	X	A	A	A	B	X	B	X	B	B	A	B	A	B	A	A	B	A	X	A	A	A	A	X	X	B	A	B	A	A	A	A	A	X	A	A	A	B	B	A
AX-109391114	3	9.605	X	A	B	A	B	A	B	X	B	A	A	B	X	B	B	B	B	A	B	A	A	A	A	A	A	X	A	A	A	A	A	X	B	A	B	A	A	A	B	A	A	A	A	A	B	B	X
AX-109431570	3	14.632	B	A	B	A	A	B	B	X	B	A	A	B	X	B	B	B	B	A	B	A	A	A	A	A	A	B	A	A	A	A	A	B	B	A	B	A	A	A	A	X	A	A	A	X	B	B	A
AX-109544933	3	16.648	B	A	B	A	A	B	B	X	B	A	A	B	X	B	B	X	B	A	B	A	X	A	A	A	A	A	A	X	A	A	A	A	B	A	B	X	A	A	A	A	A	A	A	B	B	B	A
AX-109271243	3	19.644	X	A	B	A	A	B	B	X	B	A	A	B	A	B	B	X	B	A	B	A	A	A	A	A	B	A	A	A	A	A	A	A	B	A	B	A	A	A	A	A	B	A	A	X	B	B	A
AX-109903080	3	30.926	B	A	B	A	A	B	B	A	B	A	A	B	A	B	B	X	B	A	B	A	B	A	A	A	B	A	A	X	A	A	A	A	B	A	B	B	A	X	A	B	B	A	A	X	B	B	A
AX-110001111	3	31.709	B	A	B	A	A	B	B	A	B	A	A	B	A	B	B	X	B	A	B	A	B	A	A	A	B	A	A	X	A	A	A	A	B	A	B	B	A	B	A	B	B	A	A	X	B	B	A
AX-109845657	3	33.612	B	A	B	A	A	B	B	A	B	A	A	B	A	B	B	B	B	A	B	A	B	A	A	A	B	B	A	X	A	A	A	B	B	A	B	B	A	A	A	A	B	A	A	X	B	B	A
AX-89672619	3	33.978	B	A	B	A	A	B	B	A	B	A	A	B	A	B	B	B	B	A	B	A	B	A	A	A	B	B	A	X	A	A	A	B	B	A	B	B	A	A	A	A	B	A	A	X	B	B	A
AX-111020212	3	34.393	B	A	B	A	A	B	B	A	B	A	A	B	A	B	B	B	B	A	B	A	B	A	A	A	B	B	A	X	A	A	A	B	B	A	B	B	A	X	A	B	B	A	A	X	B	B	A
AX-111853381	3	49.937	B	A	B	X	A	A	B	A	A	A	A	B	A	B	B	B	B	A	B	B	A	A	B	B	A	B	A	B	A	X	A	B	B	B	B	B	B	A	A	B	A	A	A	X	B	B	A
AX-111515122	3	51.801	B	A	B	X	A	A	B	A	A	A	A	B	A	B	B	B	B	A	B	B	A	A	B	B	A	B	X	B	A	X	A	B	B	B	B	B	B	A	B	B	A	A	A	X	B	B	B
AX-110522956	3	53.221	B	A	B	A	A	A	B	A	A	A	B	B	A	B	B	X	B	A	B	B	A	A	X	B	A	B	B	B	A	A	A	B	B	B	A	B	B	A	B	B	A	A	A	X	B	B	B
AX-111406281	3	54.134	B	A	B	A	A	A	B	A	A	A	B	B	A	B	B	X	B	A	B	B	A	A	X	B	A	B	B	B	A	A	A	B	B	B	B	B	B	A	B	B	A	A	A	X	B	B	B
AX-108777939	3	54.728	B	A	B	A	A	A	B	A	A	B	B	B	A	B	B	X	B	A	B	B	A	A	B	B	A	B	B	B	A	X	A	B	B	B	B	B	B	A	B	B	A	A	A	X	B	B	B
AX-110462860	3	55.298	B	A	B	X	A	A	B	A	A	A	B	B	A	B	B	X	B	A	B	B	A	A	B	B	A	B	A	B	A	X	A	B	B	B	B	B	B	A	A	B	A	A	A	A	B	B	B
AX-111621768	3	55.772	B	A	B	A	A	A	B	A	X	A	B	B	A	B	B	A	B	A	B	B	A	A	B	B	A	B	X	B	A	X	A	B	B	B	B	B	B	A	X	B	A	A	X	X	B	B	B
AX-89661632	3	58.152	B	A	B	X	A	A	B	A	A	A	B	B	A	B	B	X	B	A	B	B	B	A	B	B	A	B	B	B	A	X	A	B	B	B	A	B	B	A	B	B	A	A	A	X	B	B	B
AX-110467646	3	62.778	B	B	A	A	A	A	B	A	A	A	A	B	X	B	B	X	B	X	B	B	B	A	B	B	A	B	B	B	A	A	A	B	B	B	A	B	B	A	B	B	A	A	A	X	B	A	B
AX-109458952	3	63.183	B	B	A	A	A	A	B	A	A	A	X	B	X	B	B	X	B	X	B	B	B	A	B	A	A	B	B	B	A	X	A	B	B	B	A	B	B	A	B	B	A	A	A	X	B	A	B
AX-108775918	3	64.567	B	B	A	A	A	A	B	A	A	A	X	B	X	B	B	X	B	X	B	B	B	A	X	A	B	B	B	B	A	X	A	B	B	B	A	B	B	A	A	B	A	A	A	A	B	A	B
AX-111090826	3	65.33	B	B	A	A	A	A	B	A	A	A	X	B	X	B	B	X	B	X	B	B	B	A	B	A	B	B	B	X	A	X	A	B	B	B	A	B	B	A	A	B	A	A	A	X	B	A	B
AX-111542671	3	66.026	B	B	A	X	A	A	B	A	A	A	X	B	X	B	B	X	B	X	B	B	B	A	B	A	B	B	B	B	A	X	A	B	B	B	A	B	B	A	B	B	A	A	A	X	B	A	B
AX-111584875	3	66.863	B	B	A	X	A	A	B	A	A	A	X	A	X	B	B	X	B	X	B	B	B	A	B	A	B	B	B	X	A	X	A	B	B	B	A	B	B	A	B	B	A	A	A	A	B	A	B
AX-108952111	3	67.32	B	B	A	A	A	A	B	A	A	A	X	A	X	B	B	X	B	X	B	B	B	A	B	A	B	B	B	X	A	X	A	B	B	B	A	B	B	A	B	B	A	A	A	A	B	A	B
AX-109475166	3	68.355	B	B	A	X	A	A	B	A	A	A	X	A	X	B	B	X	B	X	B	B	B	A	B	A	B	B	B	X	A	X	A	B	B	B	A	B	B	A	A	B	A	A	A	A	B	A	B
AX-111575769	3	68.857	B	B	A	A	A	A	B	A	A	A	X	A	X	B	B	X	B	X	B	B	B	A	B	A	B	B	B	X	A	A	A	B	B	B	A	B	B	A	B	B	A	A	A	X	B	A	B
AX-111073651	3	69.972	B	B	A	A	A	A	B	A	A	A	X	A	X	B	B	X	B	X	B	B	B	A	B	A	B	B	B	X	A	A	A	B	B	B	A	B	B	A	B	B	A	A	B	A	B	A	B
AX-111558345	3	71.01	B	B	B	A	A	A	B	A	A	A	X	A	X	B	B	X	B	X	B	B	B	A	B	A	B	B	B	A	A	A	A	B	B	B	A	B	B	A	B	B	A	A	B	X	B	A	B
AX-111691152	3	72.143	B	B	B	A	A	A	B	A	A	A	X	A	X	B	B	A	B	A	B	B	B	A	B	A	B	B	X	A	A	A	A	B	B	B	A	B	B	A	A	B	A	A	B	X	B	A	B
AX-108749950	3	81.892	B	B	A	A	A	A	B	A	X	A	A	A	X	B	B	B	B	X	A	B	B	B	B	B	B	A	B	A	A	A	A	X	B	B	A	B	B	A	B	B	A	A	B	X	B	A	B
AX-111743519	3	82.72	B	B	A	A	A	A	B	A	X	B	A	A	X	B	B	B	B	X	A	B	B	B	B	B	B	A	B	A	A	A	A	X	B	B	A	B	B	A	B	B	A	A	B	X	B	A	B
AX-109425261	3	82.893	B	B	A	A	A	A	B	A	X	B	A	A	X	B	B	B	B	B	A	B	B	B	B	B	B	A	B	A	A	A	A	B	B	B	A	B	B	A	B	B	A	A	B	B	B	X	B
AX-86179129	3	83.65	B	B	A	A	A	A	B	A	X	B	A	A	X	B	B	B	B	B	A	B	B	B	B	B	B	A	B	A	A	A	A	X	B	X	A	A	B	A	B	B	A	A	B	X	B	A	B
AX-111558784	3	83.831	B	B	A	A	A	A	B	A	X	B	A	A	X	B	B	B	B	B	A	B	B	B	B	B	B	A	B	A	A	A	A	X	B	X	A	A	B	A	B	B	A	A	B	B	B	A	B
AX-110966348	3	84.047	B	B	A	A	A	A	B	A	X	B	A	A	X	B	B	B	B	B	A	B	B	B	B	B	B	A	B	A	A	A	A	X	B	X	A	A	B	A	B	B	A	A	B	X	B	A	B
AX-109939136	3	84.588	B	B	A	A	A	A	B	A	X	B	A	A	X	B	B	B	B	B	A	B	B	B	B	B	B	A	B	A	A	A	A	X	B	X	A	A	B	A	B	B	A	A	B	X	B	A	B
AX-111701483	3	84.968	B	B	X	A	A	A	B	A	X	B	A	A	X	B	B	B	B	B	A	B	B	B	B	B	B	A	B	A	A	A	A	X	B	X	A	A	B	A	B	B	A	A	B	X	B	A	B
AX-110518215	3	86.032	B	B	X	A	A	A	B	A	X	B	A	A	X	B	B	B	B	B	A	B	B	B	A	B	B	A	B	A	A	A	A	X	B	X	A	A	B	A	B	B	A	A	B	B	B	A	B
AX-109941423	3	86.583	B	B	X	A	A	A	B	A	X	B	A	A	X	B	B	B	B	B	A	B	B	B	A	B	B	A	B	A	A	A	A	X	B	X	A	A	B	A	B	B	A	A	B	X	B	A	B
AX-109078577	3	88.539	B	B	X	A	A	A	B	A	X	B	X	A	X	B	B	B	B	B	A	B	B	B	A	B	B	X	B	A	A	A	A	X	B	B	A	B	B	B	B	B	A	A	B	X	B	A	B
AX-110711194	3	89.023	B	A	X	A	A	A	B	A	A	B	X	A	X	B	B	B	B	B	A	B	B	B	A	B	B	X	B	A	A	A	A	X	B	B	A	B	B	B	B	B	A	A	B	X	B	A	B
AX-110823145	3	89.555	B	A	X	A	A	A	B	A	X	B	X	A	X	B	B	B	B	B	A	B	B	B	A	B	B	X	B	A	A	A	A	X	B	B	A	B	B	B	B	B	A	A	B	X	B	A	B
AX-110988091	3	91.11	B	A	A	X	A	A	A	A	A	B	A	A	X	B	B	B	X	B	A	B	B	B	A	B	B	A	B	A	A	A	A	X	B	B	A	B	B	X	B	B	A	A	B	A	B	A	B
AX-108878320	3	92.088	B	A	A	A	A	A	A	A	A	B	A	A	X	B	B	B	B	B	A	B	B	B	A	B	B	A	B	A	A	A	A	A	B	B	A	X	B	X	B	B	A	A	B	A	B	A	B
AX-108813568	3	92.922	B	A	X	A	A	A	B	A	X	B	A	A	X	B	B	B	B	B	A	B	B	B	A	B	B	X	B	A	A	A	A	X	B	B	A	B	B	X	B	B	A	B	B	B	B	A	B
AX-109815135	3	93.184	B	A	A	A	A	A	B	A	A	B	A	A	A	B	B	B	B	B	A	B	B	B	A	B	B	A	B	A	A	A	A	A	B	B	A	X	B	X	B	B	A	B	B	X	B	A	B
AX-111894851	3	94.662	B	A	X	A	A	A	B	A	A	B	A	A	X	B	B	X	B	B	A	B	B	B	A	B	B	X	B	A	A	A	A	A	B	B	A	B	B	B	A	B	A	B	B	X	B	A	A
AX-109730166	3	94.849	B	A	X	A	A	A	B	A	X	B	A	A	X	B	B	X	B	X	A	B	X	B	A	B	B	X	B	A	A	A	A	A	X	B	A	B	B	B	A	B	A	B	B	B	B	A	A
AX-108774920	3	100.025	B	B	A	B	A	A	B	A	X	B	X	A	X	B	B	B	B	A	A	B	A	B	A	B	B	X	B	A	A	A	A	X	B	B	A	B	B	A	B	B	A	B	A	X	B	A	B
AX-89693771	3	103.599	B	B	A	X	A	A	B	A	B	A	B	A	X	B	B	X	B	A	A	B	A	B	A	B	B	X	B	A	A	A	A	A	B	B	A	B	B	A	A	B	A	B	A	B	B	A	B
AX-111514251	3	105.856	B	A	A	X	A	A	B	X	B	A	B	A	X	B	B	B	B	A	A	B	B	B	A	A	B	X	B	X	A	B	A	X	B	B	A	B	B	A	A	B	A	B	A	B	B	A	B
AX-109530293	3	106.335	B	B	A	B	A	A	B	X	B	A	B	A	X	B	B	B	B	A	A	B	A	B	A	A	B	X	B	X	A	B	A	X	B	B	A	B	B	A	A	B	A	X	A	B	B	A	B
AX-109352933	3	108.315	B	A	A	X	A	A	B	X	B	A	B	A	X	B	B	X	B	A	A	B	A	B	A	A	B	X	B	X	A	B	A	A	B	B	A	B	B	A	A	B	A	X	A	B	B	A	B
AX-109911808	3	116.84	B	A	A	X	A	A	B	X	B	B	B	A	X	B	B	X	B	X	A	B	B	B	A	A	B	X	A	X	A	B	A	A	B	B	A	B	B	A	A	A	A	B	A	X	B	A	X
AX-110166184	4	0	B	A	B	A	B	A	A	A	X	X	A	B	X	A	A	A	A	B	B	A	A	B	A	B	A	B	B	B	X	B	A	B	A	B	B	B	B	A	A	A	B	B	B	A	A	A	B
AX-109434737	4	0.911	X	A	B	A	B	A	A	A	X	X	A	B	X	A	A	A	X	B	B	A	A	B	A	B	A	X	B	X	B	B	A	X	A	B	B	B	B	A	A	A	B	B	B	A	A	A	B
AX-111650990	4	1.781	B	A	B	A	B	A	A	A	X	X	A	B	A	A	A	X	X	B	B	A	A	B	A	B	A	B	B	X	X	B	A	B	A	B	B	B	B	A	B	A	B	B	B	X	A	A	B
AX-109957471	4	2.838	X	A	B	A	B	A	A	A	X	X	A	B	A	A	A	A	X	B	B	A	A	B	A	B	A	X	B	A	X	B	A	X	A	B	B	B	B	A	A	A	B	B	B	A	A	A	B
AX-110026721	4	3.064	X	A	B	A	B	A	A	A	X	X	A	B	A	A	A	A	X	B	B	A	A	B	A	B	A	X	B	A	A	B	A	X	A	B	B	B	B	A	A	A	B	B	B	A	A	A	B
AX-110530257	4	3.592	B	A	B	A	B	A	A	A	X	X	A	B	A	A	A	A	X	B	B	A	A	B	A	B	A	X	B	X	A	B	A	X	A	B	B	B	B	A	A	A	B	B	B	A	A	A	B
AX-111503398	4	5.209	X	A	B	A	B	A	A	A	X	B	B	B	A	A	A	A	A	B	B	A	A	B	A	B	A	A	B	X	A	B	A	X	A	X	B	X	B	A	A	A	B	B	B	A	A	A	B
AX-110961126	4	5.938	X	A	B	A	B	A	A	A	A	B	B	B	A	A	A	A	X	B	B	A	A	B	A	B	A	A	B	A	A	B	A	X	A	X	B	X	B	A	A	A	B	B	B	A	A	A	B
AX-108757759	4	6.427	X	A	B	A	B	A	A	A	A	B	B	B	A	A	A	A	X	B	B	A	A	B	A	B	A	A	B	A	A	B	B	X	A	B	B	X	B	A	A	A	B	B	B	A	A	A	B
AX-109820570	4	7.847	X	A	B	A	B	A	A	X	A	B	B	B	A	A	A	A	A	B	B	B	A	B	A	B	A	A	B	A	A	B	B	X	B	A	B	A	X	A	A	A	B	B	B	A	A	A	B
AX-108997379	4	8.784	X	A	B	A	B	A	B	X	A	B	B	B	A	A	A	A	A	B	B	B	A	B	A	B	A	A	B	A	A	B	B	X	X	A	B	A	X	A	A	A	B	B	B	X	B	A	B
AX-109983097	4	9.096	X	A	B	A	B	A	B	X	A	B	B	B	A	A	A	A	A	B	B	B	A	B	A	B	A	A	B	A	A	B	B	X	X	A	B	A	X	A	A	A	B	B	B	X	B	A	B
AX-110149016	4	10.395	X	X	B	A	B	A	B	X	A	B	B	B	A	A	A	A	A	B	B	B	A	B	A	B	A	A	B	A	A	B	B	X	B	A	B	A	X	A	A	A	B	B	B	X	B	A	B
AX-109031576	4	15.328	B	A	B	A	B	A	A	A	A	A	A	A	X	A	A	B	B	B	B	A	B	B	A	B	X	X	B	X	B	B	B	X	A	B	B	B	X	A	B	A	B	B	B	A	B	A	A
AX-111626614	4	16.238	X	A	B	A	B	A	A	A	X	A	A	A	X	A	A	X	B	B	B	A	B	B	A	B	X	A	B	A	B	B	B	A	A	B	B	B	A	A	B	A	B	B	B	A	B	A	A
AX-109425981	4	16.35	B	A	B	A	B	A	A	A	X	A	A	A	B	A	A	B	X	B	B	A	B	B	A	B	X	X	B	X	B	B	A	X	A	B	B	B	X	A	B	A	B	B	B	A	B	A	A
AX-110514157	4	21.628	B	A	B	A	B	A	A	A	A	A	A	A	X	A	A	X	B	B	B	A	B	B	A	B	X	X	B	A	A	X	B	X	B	B	B	B	X	B	B	B	B	X	B	X	B	A	A
AX-109832327	4	33.153	B	A	X	A	B	A	A	A	B	A	A	A	X	A	A	X	B	X	B	A	B	B	A	B	B	A	X	A	A	A	B	A	A	B	B	B	B	B	A	B	B	A	B	A	B	A	A
AX-111634382	4	34.355	B	A	X	A	B	A	A	A	B	A	A	A	X	A	A	X	B	B	B	A	B	B	A	A	B	A	X	X	A	A	B	X	A	B	B	B	B	B	X	B	B	X	B	A	B	A	A
AX-111497412	4	36.366	B	A	X	A	B	A	A	A	B	A	A	A	A	A	A	A	B	B	B	A	B	B	A	A	B	A	X	A	A	A	B	X	A	B	B	B	B	B	A	B	B	A	B	A	B	A	A
AX-108804889	4	41.432	B	A	A	A	B	A	A	A	B	A	A	A	A	A	A	X	B	B	A	A	B	B	A	A	B	B	X	A	A	A	B	A	A	B	B	B	B	B	A	B	X	A	B	A	B	A	A
AX-109873296	4	42.45	B	A	A	A	B	A	A	A	B	A	A	A	A	A	A	X	B	B	A	A	B	B	A	A	B	B	X	A	A	A	B	X	A	B	B	B	B	B	A	B	X	A	B	A	B	A	A
AX-108741112	4	42.67	B	A	A	A	B	A	A	A	B	A	A	A	X	A	A	B	B	B	A	A	B	B	A	A	B	B	X	X	A	A	B	X	A	B	B	B	X	B	X	B	B	X	B	X	B	A	A
AX-109951114	4	44.162	B	A	A	A	B	A	A	A	B	A	A	X	X	A	A	X	B	B	A	A	B	B	A	A	B	B	X	A	A	A	B	X	A	B	B	B	B	B	A	B	B	B	B	A	B	A	A
AX-109301633	4	46.466	B	A	A	A	B	A	A	A	B	A	A	X	X	A	A	A	B	B	A	A	A	B	A	A	B	A	X	X	A	A	B	X	A	B	B	A	B	B	A	B	B	B	B	X	B	A	A
AX-111220697	4	46.812	B	A	A	A	B	A	A	A	B	A	A	X	A	A	A	X	B	B	A	A	A	B	A	A	B	B	X	X	A	A	B	X	A	B	B	A	B	B	A	B	X	B	B	X	B	A	A
AX-110144651	4	47.783	B	A	A	A	B	A	A	A	B	A	A	X	A	A	A	X	B	B	A	A	A	B	A	A	B	B	X	A	A	A	B	X	A	B	B	A	B	B	A	B	B	B	B	A	X	A	A
AX-110630755	4	50.458	B	A	A	A	B	A	A	A	B	B	A	A	X	A	A	X	B	B	A	A	A	B	A	A	B	B	X	B	A	A	B	B	A	X	B	A	B	B	A	B	B	B	B	X	B	A	A
AX-110631205	4	50.72	B	A	A	A	B	A	A	A	B	B	A	A	X	A	A	B	B	B	A	A	A	B	A	A	B	B	X	X	A	A	B	B	A	X	B	A	B	B	A	B	B	B	B	X	B	A	A
AX-110126474	4	51.954	B	A	A	A	B	A	A	A	B	B	A	A	X	A	A	X	B	B	A	A	A	B	A	A	B	B	X	B	A	A	B	B	A	X	A	A	A	B	X	B	B	A	B	B	B	A	A
AX-111587627	4	52.043	B	A	A	A	B	A	A	A	B	B	A	A	X	A	A	X	B	B	A	A	A	B	A	A	B	B	X	B	A	A	B	B	A	X	A	A	A	B	X	B	B	A	B	X	B	A	A
AX-108788546	4	52.289	B	A	A	A	B	A	A	A	B	B	A	A	B	A	A	B	B	B	A	A	A	B	A	A	B	B	B	B	A	A	B	B	A	X	A	X	A	B	B	B	B	X	B	B	B	A	A
AX-109507838	4	52.408	B	A	A	A	B	A	A	A	B	B	A	A	B	A	A	B	B	B	A	A	A	B	A	A	B	B	X	X	A	A	B	B	A	X	A	A	A	B	B	B	B	A	B	X	B	A	A
AX-110489401	4	52.642	B	A	A	A	B	A	A	A	B	B	A	A	X	A	A	X	B	B	A	A	A	B	A	A	B	B	X	B	A	A	B	B	A	X	A	A	A	B	X	B	B	A	B	B	B	A	A
AX-108945106	4	52.713	B	A	A	A	B	A	A	A	B	B	A	A	B	A	A	X	B	B	A	A	A	B	A	A	B	B	X	X	A	A	B	B	A	X	A	A	A	B	X	B	X	A	B	X	B	A	A
AX-111140902	4	52.833	B	A	A	A	B	A	A	A	B	B	A	A	X	A	A	B	B	B	A	A	A	B	A	A	B	B	X	A	A	A	B	B	A	X	A	A	A	B	B	B	B	X	B	X	B	A	A
AX-108927651	4	52.873	B	A	A	A	B	A	A	A	B	B	A	A	B	A	A	B	B	B	A	A	A	B	X	A	B	B	X	X	A	A	B	B	A	X	B	A	A	B	B	B	B	X	B	B	B	A	A
AX-110190850	4	53.792	B	A	A	A	B	A	A	A	B	B	A	A	B	A	A	X	B	B	A	A	A	B	A	A	B	B	B	X	A	A	B	B	A	X	A	A	A	B	B	B	B	A	B	X	B	A	A
AX-111576466	4	54.019	B	A	A	A	B	A	A	A	B	B	A	A	B	A	A	X	B	B	A	A	A	B	A	A	B	B	X	X	A	A	B	B	A	X	A	A	A	B	X	B	B	A	B	X	B	A	A
AX-109455008	4	54.696	B	A	A	A	B	A	A	A	B	B	A	A	B	A	A	B	B	B	A	A	A	B	X	A	B	B	B	B	A	A	B	B	A	B	A	B	A	B	B	B	B	A	B	B	B	A	A
AX-109290429	4	54.957	B	A	A	A	B	A	A	A	B	B	A	A	X	A	A	X	B	B	A	A	A	B	X	A	B	B	X	X	A	A	B	B	A	X	A	B	A	B	X	B	B	A	B	B	B	A	A
AX-86179766	4	55.372	B	A	A	A	B	A	A	A	B	B	A	A	X	A	A	X	B	B	A	A	A	B	A	A	B	B	B	X	A	A	A	B	A	X	A	B	A	B	B	B	B	A	B	B	B	A	A
AX-109283226	4	55.705	B	A	A	A	B	A	A	A	B	B	A	A	X	A	A	X	B	B	A	A	A	B	A	A	B	B	X	X	A	A	A	B	A	X	A	B	A	B	B	B	B	A	B	B	B	A	A
AX-110493738	4	57.137	B	A	A	B	B	A	A	A	B	B	A	A	X	A	A	X	B	B	A	A	A	B	A	A	B	B	X	X	X	A	A	B	A	X	A	B	A	B	X	B	B	A	B	B	B	A	A
AX-108780549	4	57.62	B	A	A	B	B	A	A	A	B	B	A	A	X	A	A	X	B	B	A	A	A	B	A	A	B	B	X	B	X	A	A	B	A	X	A	B	A	B	B	B	B	A	B	B	B	A	A
AX-110672429	4	57.867	B	A	A	B	B	A	X	A	B	B	A	A	B	A	A	B	B	B	A	A	A	B	A	A	B	B	X	B	B	A	A	B	A	X	A	B	A	B	B	B	B	A	B	B	B	A	A
AX-108863728	4	59.261	B	A	A	B	B	A	A	A	B	A	A	A	X	A	B	B	B	B	A	A	A	B	A	A	B	B	X	B	B	A	A	B	A	X	A	B	A	B	X	B	B	A	B	X	B	A	A
AX-110022563	4	60.228	B	A	A	B	B	A	A	A	B	A	A	A	X	A	B	A	B	B	A	A	A	B	A	A	B	X	X	B	B	A	A	A	A	X	A	B	A	B	A	B	B	A	B	X	B	A	A
AX-110016335	4	60.408	B	A	A	X	B	A	A	A	B	A	A	A	X	A	B	A	B	B	X	A	A	B	A	A	B	X	X	B	B	A	A	A	A	A	A	B	A	B	A	B	B	A	B	X	B	A	A
AX-109275825	4	60.515	B	A	A	B	B	A	A	A	B	A	A	A	X	A	B	A	B	B	X	A	A	B	A	A	B	X	X	B	B	A	A	A	A	X	A	B	A	B	A	B	B	A	B	X	B	A	A
AX-109330900	4	60.711	B	A	A	B	B	A	A	A	B	A	A	A	X	A	B	A	B	B	X	A	A	B	A	A	B	X	X	B	B	A	A	A	A	A	A	B	A	B	A	B	B	A	B	X	B	A	A
AX-109301431	4	64.248	B	A	A	X	B	A	B	A	B	A	A	X	X	A	B	A	B	B	X	A	A	B	A	A	B	X	A	B	B	A	A	A	A	X	A	B	A	B	A	B	B	B	B	X	B	A	A
AX-109999116	4	64.379	B	A	A	B	B	A	B	A	B	A	A	B	X	A	B	A	B	B	X	A	A	B	A	A	B	X	A	B	B	A	A	A	A	X	A	B	A	B	A	B	B	B	B	X	B	A	A
AX-108772133	4	65.274	B	A	X	X	B	A	B	A	B	A	A	B	X	A	B	B	B	B	X	A	A	B	A	A	B	B	A	B	B	A	A	A	A	X	B	B	A	B	A	B	B	B	B	X	B	A	A
AX-108786044	4	65.831	B	A	X	B	B	A	B	A	B	A	A	B	X	A	B	B	B	B	B	A	A	B	A	A	B	B	A	B	X	A	A	B	A	X	B	B	A	B	A	B	B	B	B	B	B	A	A
AX-109905162	4	65.859	B	A	X	B	B	A	B	A	B	A	A	B	X	A	B	B	B	B	B	A	A	B	A	A	B	B	A	B	B	A	A	A	A	X	B	B	A	B	A	B	B	B	B	X	B	A	A
AX-110554847	4	66.041	B	A	X	B	B	A	B	A	B	A	A	B	X	A	B	B	B	B	X	A	A	B	A	A	B	B	A	B	B	A	A	A	A	X	B	B	A	B	A	B	B	B	B	X	B	A	A
AX-109842451	4	66.254	B	A	X	B	B	A	B	A	B	A	A	B	X	A	B	B	B	B	X	A	A	B	A	A	B	B	A	B	B	A	A	A	A	X	B	B	A	B	A	B	B	B	B	X	B	A	A
AX-110398168	4	66.907	B	A	X	X	B	A	B	A	X	A	A	B	X	A	B	A	B	B	X	A	A	B	A	A	B	X	A	B	B	A	A	A	A	X	B	B	A	B	A	B	B	B	B	X	X	A	A
AX-109891139	4	67.21	B	A	X	B	B	A	B	A	B	A	A	B	X	A	B	A	B	B	X	A	A	B	A	A	B	X	A	X	B	A	A	A	A	X	B	B	A	B	A	B	B	B	B	B	B	A	A
AX-109346982	4	67.712	B	A	A	X	B	A	B	A	B	A	A	B	X	A	B	A	B	B	B	A	A	B	A	A	B	X	A	B	X	A	A	A	A	X	B	B	A	B	A	B	B	B	B	B	B	A	A
AX-110017739	4	67.788	B	A	A	X	B	A	B	A	B	A	A	B	X	A	B	A	B	B	B	A	A	B	A	A	B	B	A	B	B	A	A	A	A	B	B	B	A	B	A	B	B	B	B	B	B	A	A
AX-111026125	4	69.248	B	A	A	X	B	A	B	A	B	A	A	B	X	A	B	B	B	B	B	A	A	B	A	A	B	B	A	X	B	A	A	A	A	B	B	B	A	A	A	B	B	B	B	B	B	A	A
AX-109277755	4	69.481	B	A	A	X	B	A	B	A	B	A	A	B	X	A	B	A	B	B	B	A	A	B	A	A	B	X	A	B	B	A	A	A	A	X	B	B	A	A	A	X	B	B	B	B	B	A	A
AX-109843778	4	69.998	A	A	A	B	B	A	B	A	B	A	A	B	X	A	B	A	B	B	B	A	A	B	A	A	B	X	A	B	B	A	A	A	A	X	B	B	A	A	A	X	B	B	B	X	B	A	A
AX-108940749	4	70.145	A	A	A	B	B	A	B	A	B	A	A	B	X	A	B	A	B	B	B	A	A	B	A	A	B	X	A	B	B	A	A	A	A	X	B	B	A	A	A	X	B	B	B	B	B	A	A
AX-110418781	4	72.735	A	A	A	X	B	A	B	A	B	A	A	B	B	A	B	B	B	B	B	A	A	B	A	A	B	B	A	B	B	A	A	A	A	X	B	B	A	A	A	A	B	B	B	B	B	A	A
AX-109882240	4	73.546	X	A	A	B	B	A	B	A	B	A	A	B	X	A	B	B	B	B	B	A	A	B	A	A	B	B	A	B	B	A	A	A	A	X	B	B	A	A	A	A	A	B	B	X	B	A	A
AX-110391015	4	73.663	A	A	A	B	B	A	B	A	B	A	A	B	B	A	B	B	B	B	B	A	A	B	X	A	B	B	A	B	B	A	A	A	A	X	B	B	A	A	A	A	A	B	B	X	B	A	A
AX-110427653	4	73.949	A	A	A	B	B	A	B	A	B	A	A	A	X	A	B	B	B	B	B	A	A	B	A	A	B	B	A	B	X	A	A	A	A	X	B	B	A	A	A	A	A	B	B	X	B	A	A
AX-109379119	4	74.258	A	A	A	B	B	A	B	A	B	A	A	A	X	A	B	B	B	B	B	A	A	B	X	A	B	B	A	B	X	A	A	A	A	X	B	B	A	A	A	A	A	B	B	X	B	A	A
AX-110015822	4	74.393	A	A	A	B	B	A	B	A	B	A	A	A	X	A	B	B	B	B	B	A	A	B	A	A	B	B	A	B	X	A	A	A	A	X	B	B	A	A	A	A	A	B	B	X	B	A	A
AX-110530937	4	74.584	A	A	A	B	B	A	B	A	B	A	A	A	X	A	B	B	B	B	B	A	A	B	A	A	B	B	A	B	X	A	A	A	A	X	B	B	A	A	A	A	A	B	B	X	B	A	A
AX-111212405	4	74.919	A	A	A	B	B	A	B	A	B	A	A	A	X	A	B	B	B	B	B	A	A	B	A	A	B	B	A	B	X	A	A	B	A	A	B	B	A	A	A	A	A	B	B	X	B	A	A
AX-109917880	4	75.749	A	A	A	B	B	A	B	A	B	A	X	A	X	A	B	X	B	B	B	A	A	B	A	A	B	X	A	B	X	A	A	B	A	X	B	B	A	A	A	A	A	B	B	A	B	A	A
AX-109542304	4	76.149	A	A	A	B	B	A	B	A	B	A	X	A	X	A	B	B	B	B	B	A	A	B	A	A	B	B	A	B	B	A	A	A	A	X	B	B	A	A	A	A	A	B	B	A	B	A	A
AX-110574904	4	76.573	B	A	A	B	B	A	B	A	X	A	X	A	X	A	B	B	B	B	A	A	A	B	A	A	B	B	A	B	B	A	A	A	A	X	B	B	A	A	A	A	A	B	B	X	B	A	A
AX-109556015	4	77.007	A	A	A	B	B	A	B	A	X	A	X	A	X	A	B	B	B	B	A	A	A	B	A	A	B	B	A	B	X	A	A	A	A	A	B	B	A	A	A	A	A	B	B	X	B	A	A
AX-109969747	4	87.183	B	B	A	X	B	A	A	A	B	A	X	A	B	A	B	X	X	B	A	A	B	B	A	A	B	B	A	X	A	X	A	B	A	X	B	B	A	A	A	A	A	B	B	A	B	B	A
AX-110105126	4	87.688	X	X	A	X	B	A	A	A	B	A	X	A	X	A	B	A	A	B	A	A	X	B	A	A	B	X	A	X	A	X	A	X	A	A	B	B	A	A	A	A	A	B	B	X	B	B	A
AX-110185306	4	88.326	B	X	A	B	B	A	A	A	B	A	B	A	B	A	B	X	X	B	A	A	B	B	A	A	B	X	A	X	A	X	A	B	A	X	A	B	A	A	A	A	A	B	B	X	B	B	A
AX-110109766	4	88.694	B	X	A	X	B	A	A	A	B	A	X	A	X	A	B	X	X	B	A	A	B	B	A	A	B	X	A	X	A	X	A	B	A	A	A	B	A	A	A	A	A	B	B	X	B	B	A
AX-111680297	4	89.149	B	X	A	B	B	A	A	A	B	A	B	A	B	A	B	A	X	B	A	A	B	B	A	A	B	X	A	X	A	X	A	B	X	A	A	B	A	A	A	A	A	B	B	X	B	B	A
AX-109311865	4	91.01	B	X	A	B	B	A	A	A	B	A	B	A	X	A	B	A	X	B	A	A	B	B	A	A	B	X	A	A	A	X	A	X	A	X	A	B	A	A	A	A	A	B	B	A	B	B	A
AX-108904491	4	91.333	B	X	A	B	B	A	A	A	B	A	B	A	B	A	B	A	X	B	A	A	B	B	A	A	B	X	A	A	A	X	A	X	A	A	A	B	A	A	A	A	A	B	B	X	B	B	A
AX-110990867	4	92.294	B	X	A	X	B	A	A	A	B	A	B	A	X	A	B	A	X	B	A	A	B	B	A	A	B	B	A	A	A	X	A	B	A	A	A	B	A	A	A	A	A	B	B	X	B	B	A
AX-108855493	4	92.693	B	X	A	B	B	A	A	A	B	A	B	A	X	A	B	X	X	B	A	A	B	B	A	A	B	X	A	A	A	X	A	B	X	A	A	B	A	A	A	A	A	B	B	X	B	B	A
AX-110683989	4	94.093	B	X	A	B	B	A	A	A	B	A	B	A	B	A	B	A	B	B	A	A	B	B	A	A	B	B	A	A	A	X	A	B	A	X	B	B	A	A	A	A	A	B	B	A	B	B	A
AX-108949998	4	94.652	B	B	A	B	B	A	A	A	B	A	B	A	B	A	B	X	B	B	A	A	B	B	X	A	B	B	X	A	A	X	A	B	A	A	B	B	A	A	A	A	A	B	B	B	B	B	A
AX-110949248	4	94.992	B	B	A	B	B	A	A	A	B	A	B	A	B	A	B	X	B	B	A	A	B	B	A	A	B	X	X	A	A	X	A	B	A	X	B	B	A	A	A	A	A	B	B	B	B	B	A
AX-111036826	4	96.218	B	B	A	B	B	A	A	A	B	A	B	A	B	A	B	X	B	B	A	A	B	B	A	A	B	A	X	A	A	X	A	B	A	A	B	B	A	A	A	A	A	B	B	B	B	B	A
AX-110979451	4	96.391	B	B	A	B	B	A	A	A	B	A	B	A	B	A	B	A	B	B	A	A	B	B	A	A	B	B	B	A	A	X	A	B	A	X	B	B	A	A	A	A	A	B	B	B	B	B	A
AX-108873139	4	96.698	B	B	A	B	B	A	A	A	B	A	B	A	B	A	B	X	B	B	A	A	B	B	A	A	B	A	B	A	A	X	A	B	A	X	B	B	A	A	A	A	X	B	B	B	B	B	A
AX-111708024	4	98.098	B	B	A	X	B	A	A	A	B	A	B	A	B	A	B	A	X	B	A	A	B	B	B	A	X	B	B	A	A	X	A	B	X	A	B	B	A	A	A	A	B	B	B	B	B	B	A
AX-110190822	4	100.995	A	B	A	B	B	A	A	X	B	A	X	A	B	A	B	X	X	B	A	A	B	B	A	A	X	A	B	X	A	X	A	B	X	X	B	B	X	A	A	A	B	B	B	X	B	B	A
AX-110936116	4	101.425	A	B	A	B	B	A	A	X	B	A	X	A	B	A	B	X	X	B	A	A	B	B	A	A	X	A	B	X	A	X	A	B	X	X	B	B	A	A	A	A	B	B	B	B	B	B	A
AX-108918456	4	101.883	A	B	A	B	B	A	A	X	B	A	X	A	B	A	B	A	X	B	A	A	B	B	A	A	X	X	B	X	A	B	A	B	X	X	B	B	A	A	A	A	B	B	B	B	B	B	A
AX-110065185	4	102.493	A	B	X	X	B	A	A	X	B	A	A	A	B	A	B	A	X	B	A	A	B	B	A	A	X	X	X	X	A	B	A	B	X	X	B	B	A	A	A	A	B	B	B	B	B	B	A
AX-111758882	4	104.686	X	B	X	X	B	A	A	X	B	A	A	B	B	A	B	A	A	B	A	A	B	B	A	A	X	X	X	X	A	B	A	A	X	X	B	B	A	A	A	A	X	B	B	B	B	B	A
AX-109488051	4	105.223	A	B	X	X	B	A	A	X	B	A	A	B	B	A	B	A	X	B	A	B	B	B	A	A	X	X	B	X	X	B	A	A	X	B	B	B	A	A	A	A	B	B	B	B	B	B	A
AX-110134544	4	105.559	A	B	X	X	B	A	A	X	B	A	A	B	B	A	B	A	A	B	A	B	B	B	A	A	X	A	X	X	A	B	A	A	A	X	B	B	A	A	A	A	B	B	B	B	B	B	A
AX-109483522	4	106.082	X	B	X	X	B	A	A	X	B	A	A	B	B	A	B	A	A	B	A	A	B	B	A	A	X	A	X	X	X	B	A	A	X	X	B	B	A	A	A	A	X	B	B	B	B	B	A
AX-111545497	4	106.551	A	B	X	A	B	A	A	X	B	A	A	B	B	A	B	A	A	B	A	A	B	B	A	A	X	A	X	A	A	B	A	A	A	X	B	B	A	A	A	A	X	B	B	B	B	B	A
AX-111478907	4	109.315	X	B	A	X	B	A	A	X	B	A	A	B	B	A	B	X	A	A	A	B	B	B	A	A	X	X	X	A	A	B	A	A	X	X	A	B	A	A	A	A	X	B	B	X	B	B	A
AX-109344204	4	110.6	X	B	A	X	B	A	A	X	B	A	A	B	B	A	B	X	A	A	A	B	B	B	A	A	B	B	B	X	A	B	A	A	B	B	A	B	A	A	A	A	B	B	B	X	B	A	A
AX-109283889	5	0	A	B	A	X	A	B	A	B	A	A	X	A	A	A	B	X	A	B	A	A	A	B	B	A	A	A	A	X	A	A	A	A	X	A	A	A	A	X	A	B	B	B	A	X	B	B	A
AX-111067549	5	0.977	X	B	A	A	A	B	A	B	A	A	B	A	A	A	B	B	A	B	A	A	A	B	B	A	X	A	A	A	X	X	X	A	B	A	A	A	A	B	A	B	B	B	X	B	B	B	A
AX-109508819	5	1.835	A	B	A	A	A	B	A	B	A	A	X	A	A	A	B	X	A	B	A	A	A	B	B	A	A	A	A	A	X	A	A	A	X	A	A	A	A	B	A	B	X	B	X	B	B	B	A
AX-109287234	5	1.986	A	B	A	A	A	B	A	B	A	A	X	A	A	A	B	B	A	B	A	A	A	B	B	A	A	A	A	A	X	X	A	A	X	A	A	A	A	B	A	B	X	B	X	B	B	B	A
AX-108900982	5	3.742	A	B	A	A	A	B	A	B	A	A	X	A	B	A	B	B	A	B	A	A	A	B	B	A	A	A	A	A	A	X	A	A	X	A	A	A	A	B	A	B	X	B	X	X	B	B	A
AX-111762792	5	5.741	A	B	A	A	A	B	A	B	A	A	X	A	B	B	B	B	A	B	X	A	A	B	B	A	A	A	A	A	X	X	X	A	X	A	A	A	B	B	B	B	B	B	X	B	B	B	A
AX-89713814	5	6.051	A	B	A	X	A	B	A	B	A	A	X	A	B	B	B	B	A	B	X	A	A	B	B	A	A	A	A	A	X	X	A	A	X	A	A	A	B	B	A	B	X	B	X	X	B	B	A
AX-110462784	5	6.631	A	B	A	A	A	B	A	B	A	X	X	A	B	B	B	B	A	B	X	A	A	B	B	A	A	A	A	A	X	X	A	A	X	A	A	A	B	B	A	B	X	B	X	B	B	B	A
AX-110963581	5	7.741	X	B	A	A	A	B	A	B	A	X	X	A	B	B	B	B	A	B	X	A	A	B	B	A	A	A	A	A	X	X	X	A	X	A	A	A	B	B	A	B	X	B	X	X	B	B	A
AX-111141675	5	9.969	A	B	A	X	A	B	A	B	A	A	X	A	B	B	B	B	A	B	X	A	A	B	B	A	A	B	X	A	X	X	A	A	X	A	A	A	B	B	B	B	X	B	X	B	B	B	B
AX-108931194	5	14.866	A	B	A	A	A	B	A	B	A	A	B	X	B	B	A	B	A	B	B	A	A	B	B	A	B	A	X	A	A	X	B	A	X	A	A	A	B	B	A	B	A	B	X	B	B	A	A
AX-110451531	5	16.92	X	B	A	A	A	B	A	B	A	A	B	B	B	B	A	B	A	B	B	A	B	B	B	A	B	A	X	A	X	X	B	A	X	X	A	A	B	B	A	X	A	B	X	B	B	A	A
AX-108868791	5	17.948	A	B	A	X	A	B	A	B	A	A	X	B	B	B	A	X	A	B	B	A	B	B	A	A	B	A	X	A	B	A	B	A	X	X	A	A	B	B	A	X	A	B	X	X	X	A	A
AX-110465724	5	18.534	X	B	A	A	A	B	A	B	A	A	B	B	B	B	A	B	A	B	B	X	B	B	A	A	B	A	X	A	B	X	B	A	X	B	A	A	B	B	A	B	A	B	X	B	X	A	A
AX-109521596	5	18.706	X	B	A	A	A	B	A	B	A	A	X	B	B	B	A	B	A	B	B	A	B	B	A	A	B	A	X	A	B	X	B	A	X	B	A	A	B	B	A	X	A	B	X	B	X	A	A
AX-111104009	5	19.165	X	B	A	A	A	B	A	B	A	A	X	B	B	B	A	B	A	B	B	A	B	B	A	A	B	A	X	A	B	X	B	A	X	B	A	A	B	B	A	X	A	B	X	B	X	A	A
AX-111531916	5	22.375	X	B	A	X	X	B	A	B	A	A	X	B	B	B	A	B	A	B	B	A	B	B	A	A	B	A	X	A	B	B	B	A	X	X	A	A	A	X	A	X	A	A	A	B	B	A	A
AX-108843179	5	22.755	X	B	A	X	X	B	A	B	A	A	B	B	B	B	A	B	A	B	X	A	B	B	A	A	B	A	X	A	B	B	B	A	B	X	A	A	A	X	A	X	A	A	A	B	B	A	A
AX-94441014	5	25.929	A	B	A	A	A	B	A	B	A	A	B	B	B	B	A	B	A	B	X	A	B	B	A	A	B	A	B	A	B	B	B	A	B	X	A	A	A	X	A	A	A	A	A	X	A	A	A
AX-109815879	5	27.317	A	B	A	A	A	B	A	B	A	A	B	B	B	B	A	B	A	B	X	A	B	B	A	A	B	A	B	A	B	B	B	A	B	X	A	A	A	A	B	A	A	A	A	A	A	A	A
AX-111071301	5	28.304	A	B	A	A	X	B	A	B	A	A	A	B	B	B	A	B	A	B	X	A	B	B	A	A	B	A	B	A	B	B	B	A	B	B	A	A	A	X	B	B	A	A	A	X	A	A	A
AX-109074078	5	29.657	A	B	A	A	A	B	A	B	A	A	A	B	B	B	A	B	A	B	A	A	B	B	A	A	B	A	B	A	B	A	B	A	B	B	B	A	A	X	B	B	A	A	A	B	A	A	A
AX-109364389	5	29.972	A	B	A	A	X	B	A	B	A	A	A	B	B	B	A	B	A	B	A	A	B	B	A	A	B	A	B	A	B	A	B	A	B	B	A	A	A	X	B	B	A	A	A	B	A	A	A
AX-109974809	5	30.869	A	B	A	A	A	B	A	B	A	A	A	A	B	B	A	B	A	B	A	A	B	B	A	A	B	A	B	A	B	A	B	A	B	B	A	A	A	X	B	B	A	A	A	X	A	A	B
AX-110571313	5	31.3	X	B	A	X	A	B	A	B	A	A	A	A	B	B	A	B	A	B	A	A	B	B	A	A	B	A	B	A	B	A	B	A	B	B	A	A	A	X	B	B	A	A	A	X	A	A	B
AX-110518573	5	31.872	A	B	A	X	A	B	A	B	A	A	A	A	B	B	A	B	A	B	A	A	B	B	A	A	B	A	B	A	B	A	B	A	B	X	A	A	A	X	B	B	A	A	A	X	A	A	B
AX-109840429	5	32.554	A	B	A	X	A	B	A	B	A	A	A	A	B	B	A	B	A	B	A	A	B	B	A	A	B	A	B	A	B	A	B	A	B	X	A	A	A	X	B	B	A	A	A	X	A	A	B
AX-108858775	5	35.116	A	B	A	X	B	B	A	B	A	A	A	A	A	B	A	B	A	B	A	A	B	B	A	A	B	A	B	A	B	A	B	A	B	B	A	A	B	X	B	X	B	A	A	X	A	A	B
AX-108930312	5	35.268	A	B	A	X	B	B	A	B	A	A	A	A	A	B	A	B	A	B	A	A	B	B	X	A	B	A	B	A	B	A	B	A	B	B	A	X	B	X	B	B	B	A	A	X	A	A	B
AX-108925419	5	37.683	A	B	A	X	A	B	A	B	A	A	A	A	A	B	A	B	A	B	A	A	B	B	A	A	B	A	B	A	B	A	B	A	B	B	B	A	B	A	B	A	B	A	A	B	A	A	B
AX-109300203	5	38.059	A	B	A	X	A	B	A	B	A	A	A	A	A	B	A	B	A	B	A	A	B	B	A	A	B	A	B	A	B	A	B	A	B	X	B	A	B	A	X	A	B	A	A	X	A	A	B
AX-111564969	5	38.65	A	B	A	X	A	B	A	B	A	A	A	A	A	B	A	B	A	B	A	A	B	B	A	A	B	A	B	A	B	A	B	A	B	A	B	A	B	A	B	A	B	A	A	X	A	A	B
AX-108738623	5	38.926	A	B	A	X	A	B	A	B	A	A	A	X	A	B	A	B	A	B	A	A	B	B	A	A	B	A	B	A	B	A	B	A	B	A	A	A	B	A	X	A	B	A	A	X	A	A	B
AX-111473584	5	40.134	X	B	A	A	A	B	A	B	A	A	A	A	A	B	A	B	A	B	A	A	B	X	A	A	B	B	B	A	B	A	B	B	B	X	A	A	B	A	B	A	B	A	A	X	A	A	B
AX-109959683	5	40.659	X	B	A	A	X	B	A	B	A	A	A	A	A	B	A	B	A	B	A	A	B	X	A	A	B	B	B	A	B	A	B	A	B	X	A	A	B	A	X	A	B	A	A	X	A	A	B
AX-108980566	5	40.838	X	B	A	X	A	B	A	B	A	A	A	A	A	B	A	B	A	B	A	A	B	A	A	A	B	B	B	A	B	A	B	A	B	X	A	A	B	A	B	A	B	A	A	X	A	A	B
AX-109327254	5	41.57	A	B	A	X	A	B	A	B	A	A	A	A	A	B	A	B	A	B	A	A	B	X	A	A	B	B	B	A	B	A	B	A	B	A	A	A	B	X	X	X	B	B	A	X	A	A	B
AX-111003717	5	41.845	A	B	A	X	A	B	A	B	A	A	A	A	A	B	A	B	A	B	A	A	B	A	A	A	B	B	X	A	B	A	B	A	B	X	A	A	B	B	X	X	B	B	A	X	A	A	B
AX-109107523	5	42.033	A	B	A	A	A	B	A	B	A	A	A	A	A	B	A	B	A	B	A	A	B	X	B	A	B	B	B	A	B	A	B	A	B	A	A	A	B	X	B	X	B	B	A	B	A	A	B
AX-109275324	5	42.874	A	B	A	A	A	B	A	B	A	A	A	A	A	B	A	B	A	B	A	A	B	A	B	A	B	B	X	A	B	A	B	A	B	A	A	A	B	X	X	X	B	B	A	X	A	B	B
AX-111165414	5	43.931	X	B	A	X	A	B	A	B	A	A	A	A	A	B	A	X	A	B	A	A	B	A	B	A	B	B	B	A	B	A	B	B	B	A	A	A	B	B	X	X	B	B	A	X	A	B	B
AX-110062905	5	44.682	X	B	A	X	A	B	A	B	A	A	A	A	A	B	A	X	A	B	A	A	B	A	B	A	B	B	B	A	B	A	B	B	B	A	A	A	B	B	A	X	B	B	A	X	A	B	B
AX-109506426	5	45.511	X	B	A	X	A	B	A	B	A	A	A	A	A	B	A	A	A	B	A	A	B	A	B	A	B	A	X	A	B	A	B	B	B	A	A	A	B	X	A	X	B	B	A	X	A	B	X
AX-108870818	5	45.746	A	B	A	X	A	B	A	B	A	A	A	A	A	B	A	X	A	B	A	A	B	A	B	A	B	B	X	A	B	A	B	B	B	A	A	A	B	B	A	X	B	B	A	B	A	B	B
AX-111220066	5	46.065	X	X	A	X	A	B	A	B	A	A	A	A	A	B	A	X	A	B	A	A	B	A	B	A	B	B	X	A	B	A	B	A	X	A	A	A	B	B	A	X	B	B	A	B	A	B	B
AX-110929651	5	46.293	X	B	A	X	A	B	A	B	A	A	A	A	A	B	A	A	A	B	A	A	B	A	B	A	B	B	B	A	B	A	B	A	B	A	A	A	B	B	A	A	B	B	A	B	A	B	B
AX-109858717	5	47.043	A	B	A	X	A	B	A	B	A	A	A	A	A	B	A	A	A	B	A	A	B	A	B	A	B	A	B	A	B	A	B	A	X	A	A	A	B	B	A	X	B	B	A	B	A	B	B
AX-109844182	5	47.231	X	B	A	X	A	B	A	B	A	A	A	A	A	B	A	A	A	B	A	A	B	A	B	A	B	A	B	A	B	A	B	A	X	A	A	A	B	B	A	X	B	B	A	B	A	B	B
AX-109889385	5	48.404	X	B	A	X	A	B	A	B	A	A	A	A	A	B	A	X	A	B	A	A	B	A	B	A	B	B	B	A	B	A	B	A	X	A	A	A	B	B	B	X	B	B	A	B	A	B	B
AX-110508098	5	50.625	A	B	A	X	A	B	B	B	A	A	A	A	A	B	A	X	A	B	A	A	B	A	B	A	B	B	B	A	B	A	B	A	X	A	A	A	B	B	B	B	B	B	A	B	A	B	B
AX-111525364	5	51.266	A	B	A	X	A	B	B	B	A	A	A	A	A	B	A	X	A	B	A	A	B	A	B	A	B	B	B	A	B	A	B	A	X	A	A	A	B	A	B	B	B	B	A	B	A	B	B
AX-109856351	5	52.468	A	B	A	A	A	B	B	B	A	A	A	B	A	B	A	X	A	B	A	A	B	A	B	A	B	B	B	A	B	A	B	A	X	A	A	A	B	X	B	B	B	B	A	B	A	B	B
AX-108800307	5	53.902	A	B	A	A	A	B	B	B	A	A	A	B	A	B	A	A	A	B	A	A	B	A	B	A	B	B	B	A	B	A	B	A	B	A	A	A	B	A	B	X	B	B	A	B	A	B	B
AX-109818835	5	54.436	A	B	A	A	A	B	B	B	A	A	A	B	A	B	A	X	A	B	A	A	B	A	B	A	B	B	B	A	B	A	B	A	X	A	A	A	B	X	B	X	B	B	A	B	A	B	B
AX-109508154	5	54.873	A	B	A	A	A	B	B	B	A	A	A	B	A	B	A	B	A	B	A	A	B	A	B	A	B	B	B	A	B	A	B	A	X	A	A	A	B	A	B	B	B	B	A	B	A	B	B
AX-109311494	5	55.126	A	B	A	A	A	B	B	B	A	A	A	B	A	B	A	B	A	B	A	A	B	A	B	A	B	B	B	A	B	A	B	A	X	A	A	A	B	A	B	X	B	B	A	B	A	B	B
AX-109403455	5	55.351	A	B	A	A	A	B	B	B	A	A	A	B	A	B	A	B	A	B	A	A	B	A	B	A	B	B	X	A	B	A	B	A	X	A	A	A	B	A	X	X	B	B	A	B	A	B	B
AX-110026143	5	56.61	A	B	A	X	A	B	B	B	A	A	A	B	A	B	A	B	A	B	A	A	B	A	B	A	B	B	B	A	B	B	B	A	X	A	A	A	B	A	B	X	B	B	A	B	A	B	B
AX-109472636	5	56.808	A	B	A	X	A	B	B	B	A	A	A	B	A	B	A	X	A	B	A	A	B	A	B	A	B	A	B	A	B	B	B	A	X	A	A	A	B	A	X	X	B	B	A	B	A	B	B
AX-110611894	5	57.696	A	B	A	X	A	B	B	B	A	A	A	B	A	B	A	B	A	B	A	A	B	A	B	A	B	B	B	A	B	B	B	A	B	A	A	A	B	A	B	B	B	B	A	B	A	B	B
AX-109579549	5	58.018	A	B	A	X	A	B	B	B	A	A	A	B	A	B	A	B	A	B	A	A	B	A	B	A	B	A	B	A	B	B	B	A	X	A	A	A	B	A	X	X	B	B	A	B	A	B	A
AX-109536893	5	58.34	A	B	A	X	A	B	B	B	A	A	A	B	A	B	A	B	A	B	A	A	B	A	B	A	B	B	X	A	B	B	B	A	B	A	A	A	B	A	B	B	B	B	A	B	A	B	B
AX-109862245	5	58.41	A	B	A	X	A	A	B	B	A	A	A	B	A	B	A	B	A	B	A	A	B	A	B	A	B	B	B	A	B	B	B	A	B	A	A	A	B	X	B	X	B	B	A	B	A	B	B
AX-109645815	5	58.982	A	B	A	X	A	A	B	B	A	A	A	B	A	B	A	B	A	B	A	A	B	A	B	A	B	B	B	A	B	B	B	A	B	A	A	A	B	A	B	A	B	B	A	B	A	B	B
AX-109279699	5	60.158	A	B	A	X	A	A	B	B	A	A	A	B	A	B	A	B	A	B	A	A	B	A	B	A	B	B	B	A	B	B	B	A	B	A	A	A	B	A	B	X	B	B	A	B	A	B	B
AX-111561925	5	61.685	A	B	A	X	A	A	B	B	A	A	A	B	A	B	A	B	A	B	A	A	B	A	B	A	B	B	A	A	B	B	B	A	B	X	A	X	B	X	B	X	B	B	A	B	A	B	B
AX-108781411	5	62.272	A	B	A	X	A	A	B	B	A	A	A	B	A	B	A	B	A	B	A	A	B	A	B	A	B	B	A	A	B	B	B	A	B	X	A	B	B	A	B	B	B	B	A	B	A	B	B
AX-109308718	5	62.471	A	B	A	A	A	A	B	B	A	A	A	B	A	B	A	B	A	B	A	A	B	A	B	A	B	B	A	A	B	B	B	A	B	X	A	B	B	X	B	B	B	B	A	B	A	B	B
AX-108966669	5	62.678	A	B	A	A	A	A	B	B	A	A	A	B	A	B	A	B	A	B	A	A	B	A	B	A	B	B	A	A	B	B	B	A	B	X	A	B	B	X	B	B	B	B	A	B	A	B	B
AX-89700544	5	63.025	A	B	A	A	A	A	B	B	A	A	A	B	B	B	A	B	A	B	A	A	B	A	B	A	B	B	A	A	B	B	B	B	B	X	A	B	B	X	B	B	B	B	A	B	A	B	B
AX-111089108	5	63.326	A	B	A	X	A	A	B	B	A	A	A	B	B	B	A	B	A	B	A	A	B	A	B	A	B	B	A	A	B	B	B	A	B	X	A	B	B	A	B	X	B	B	A	B	A	B	B
AX-110976029	5	63.664	A	B	A	X	A	A	B	B	A	A	A	B	B	B	A	B	A	B	A	A	B	A	B	A	B	B	A	A	B	B	B	A	B	X	A	B	B	A	B	X	B	B	A	B	A	B	B
AX-109359061	5	63.803	A	B	A	X	A	A	B	B	A	A	A	B	B	B	A	B	A	B	A	A	B	A	B	A	B	B	A	A	B	B	B	A	B	X	A	B	B	A	B	X	B	B	A	B	A	B	B
AX-89672508	5	64.637	A	B	A	A	A	A	B	B	A	A	A	B	A	B	A	B	A	B	A	A	B	A	B	A	B	A	A	A	B	B	B	A	B	X	A	B	B	A	X	B	B	B	A	X	A	B	A
AX-108799915	5	65.499	A	B	A	A	A	A	B	B	A	A	A	B	B	B	B	X	A	B	A	A	B	A	B	A	B	A	A	A	B	B	B	A	B	X	A	B	B	X	X	X	B	B	A	X	A	B	A
AX-110946113	5	65.845	A	B	A	X	A	A	B	B	A	A	A	B	B	B	B	B	A	B	A	A	B	A	B	A	B	A	A	A	B	B	B	A	B	X	A	B	B	X	X	B	B	B	A	B	A	B	A
AX-89577891	5	66.528	A	B	A	A	A	A	B	B	A	A	A	B	B	B	B	B	A	B	A	B	B	A	B	A	B	A	A	A	B	B	B	A	B	X	A	B	B	X	X	B	B	B	A	X	A	B	A
AX-109070541	5	66.818	A	B	A	X	A	A	B	B	A	A	A	B	B	B	B	B	A	B	A	A	B	A	B	A	B	A	A	A	B	B	B	A	B	X	A	B	B	X	X	B	B	B	A	B	A	B	A
AX-109302093	5	68.79	A	B	A	A	A	A	B	B	A	A	A	B	B	B	B	B	A	B	A	B	B	A	B	A	B	B	A	A	B	B	X	B	B	X	A	B	B	X	B	X	X	B	A	B	A	B	A
AX-111465357	5	71.265	X	B	A	A	A	A	B	A	A	A	A	B	B	B	B	B	A	B	A	B	B	A	B	A	B	B	A	A	B	B	B	B	B	X	B	B	B	X	B	B	X	B	A	B	A	B	A
AX-110408514	5	71.375	A	B	A	A	A	A	B	A	A	A	A	B	B	B	B	B	A	B	A	B	B	A	B	A	B	B	A	A	B	B	B	B	B	B	B	B	B	X	B	X	X	B	A	B	A	B	A
AX-111109259	5	71.693	A	B	A	A	A	A	B	A	A	A	A	B	B	B	B	B	A	B	A	B	B	A	B	A	B	B	A	A	B	B	X	B	B	X	B	B	B	X	B	X	X	B	A	B	A	B	A
AX-110661329	5	72.036	A	B	A	A	A	A	B	A	A	A	A	B	B	B	B	B	A	B	A	B	B	A	B	A	B	B	A	A	B	B	X	B	B	X	B	B	B	X	B	X	X	B	A	B	A	B	A
AX-108846215	5	72.465	A	B	A	X	A	A	B	A	A	A	A	B	B	B	B	B	A	B	A	B	B	A	B	A	B	B	A	A	B	B	X	B	B	X	B	B	B	X	B	X	X	B	A	B	A	B	A
AX-109334689	5	72.737	A	B	A	X	A	A	B	A	A	A	A	B	B	B	B	B	A	B	A	B	B	A	B	A	B	B	A	A	B	B	X	B	B	X	B	B	B	X	B	X	X	B	A	B	A	B	A
AX-109278481	5	73.185	A	B	A	X	A	A	B	A	A	A	A	B	B	B	B	B	A	B	A	B	B	A	B	A	B	B	A	A	B	B	B	B	B	X	B	B	B	X	B	X	X	B	A	B	A	B	A
AX-109022733	5	73.305	A	B	A	X	A	X	B	A	A	A	A	B	B	B	B	B	A	B	A	B	B	A	B	A	B	B	A	A	B	B	X	B	B	X	B	B	B	X	B	X	X	B	A	B	A	B	A
AX-111689702	5	73.46	A	B	A	X	A	A	B	A	A	A	A	B	B	B	B	B	A	B	A	B	B	A	B	A	B	B	A	A	B	B	X	B	B	X	B	B	B	X	B	X	X	B	A	B	A	B	A
AX-111640258	5	79.062	B	B	A	A	A	A	B	X	A	A	A	B	B	B	B	B	A	B	X	B	B	A	B	A	B	B	A	X	B	B	B	B	A	X	B	B	B	X	A	X	X	B	A	B	A	B	B
AX-110363228	5	80.258	B	B	A	X	A	A	B	X	A	A	A	B	B	B	B	B	A	B	X	B	B	A	B	A	B	A	A	X	B	B	B	A	A	X	B	B	B	X	A	X	X	B	A	X	A	B	B
AX-111193580	5	80.993	B	B	A	A	A	A	B	X	A	A	A	B	B	B	A	B	A	B	X	X	B	X	B	A	B	A	A	A	B	B	B	A	A	X	B	B	B	A	A	A	A	A	A	B	A	B	A
AX-109927771	5	86.162	X	B	B	A	A	A	B	B	A	A	A	B	X	B	A	X	A	B	A	A	B	A	A	A	B	B	A	A	X	B	B	A	A	A	B	B	A	A	B	A	A	A	A	B	A	A	A
AX-110994146	5	87.964	B	B	B	A	A	A	B	B	A	A	A	B	B	B	A	B	A	B	A	X	B	X	X	A	B	B	A	X	B	B	B	A	A	A	B	B	A	A	B	A	A	A	A	B	A	A	A
AX-111715789	5	90.941	B	B	B	X	A	X	B	B	A	A	X	A	B	B	A	B	A	B	A	X	B	A	B	A	B	B	A	X	B	B	B	A	A	X	B	B	A	A	B	A	A	A	A	B	A	B	B
AX-109270887	5	91.688	B	B	B	B	A	B	B	B	A	A	B	A	B	B	A	B	A	B	A	B	B	A	B	A	B	B	X	B	B	B	B	A	A	B	B	B	A	A	B	A	A	A	A	B	A	B	B
AX-110627352	5	95.639	B	B	A	A	B	B	B	B	A	A	B	A	B	B	B	B	A	B	A	B	B	A	B	A	A	X	A	B	B	B	B	A	A	X	B	B	A	A	B	A	A	A	X	B	A	X	B
AX-94849048	5	99.954	B	B	A	A	B	B	B	B	A	A	X	A	B	B	B	A	A	B	A	B	B	A	B	A	B	B	A	B	X	B	B	A	A	B	B	B	A	A	B	A	A	A	A	X	A	X	B
AX-110468597	5	101.913	B	B	A	A	B	B	B	B	A	A	X	A	B	A	B	B	A	X	A	B	B	B	B	A	B	B	A	B	B	B	B	A	A	X	B	B	A	A	B	A	A	A	A	A	A	X	B
AX-111825402	5	102.349	B	B	A	A	B	B	B	B	A	A	X	A	B	A	B	B	A	X	A	B	B	B	B	A	B	B	X	B	B	B	B	A	A	X	B	B	A	A	B	A	A	A	A	A	A	X	B
AX-111466401	5	103.857	B	B	A	A	B	B	B	B	A	A	B	A	B	A	B	B	A	X	A	B	B	B	B	A	B	B	X	B	B	B	B	A	A	B	B	B	A	A	B	A	A	A	A	A	A	X	B
AX-110096206	5	105.136	B	B	A	A	B	B	B	B	A	A	B	A	B	A	B	B	A	X	A	B	B	B	B	A	B	B	A	B	B	B	B	A	A	X	B	B	A	A	B	A	A	A	A	A	A	B	B
AX-108859866	5	106.385	B	B	A	A	B	B	B	B	A	A	B	A	B	A	B	B	A	A	A	B	B	B	B	A	B	B	A	B	B	B	B	A	A	X	B	B	A	A	B	A	A	A	A	A	A	B	B
AX-111570478	5	108.052	A	B	A	A	B	B	B	B	A	A	B	A	B	A	B	B	A	X	A	B	B	B	B	A	B	B	X	B	B	B	B	A	A	A	B	A	A	A	B	A	A	A	A	A	A	B	B
AX-110470689	5	108.592	A	B	A	A	B	B	B	B	A	A	B	A	B	A	B	B	A	X	A	B	B	B	B	A	B	B	A	B	B	B	B	A	A	A	B	A	X	A	B	A	A	A	A	X	A	B	B
AX-108983036	5	108.76	A	B	A	A	B	B	B	B	A	A	B	A	B	A	B	B	A	X	A	B	B	B	B	A	B	B	X	B	B	B	B	A	A	A	B	A	A	A	B	A	A	A	A	X	A	B	B
AX-109374076	5	109.295	A	B	A	A	B	B	B	B	A	A	B	A	B	A	B	B	A	X	A	B	B	B	B	A	B	B	X	B	B	B	B	A	A	A	B	A	A	A	B	A	A	A	A	A	A	B	B
AX-109905665	5	110.687	A	A	A	A	B	B	A	B	A	A	B	A	B	A	B	B	A	X	A	B	B	B	B	A	B	B	X	B	B	B	B	A	A	A	B	A	A	A	B	A	A	A	A	B	A	B	B
AX-110598098	5	110.986	A	A	A	A	B	B	A	B	A	A	B	A	B	A	B	B	A	X	A	B	B	B	B	A	B	B	A	B	B	B	B	A	A	A	B	A	A	A	B	A	A	A	A	B	A	B	B
AX-108766426	5	116.162	A	A	A	A	B	B	A	B	A	A	B	A	B	B	X	X	A	X	A	A	B	B	B	A	B	X	A	B	B	B	B	A	A	B	B	B	A	A	A	A	X	A	A	B	A	B	B
AX-111649159	6	0	X	B	X	A	B	B	B	A	B	B	B	B	X	A	X	B	A	B	A	A	B	B	B	A	A	B	B	X	B	A	A	A	B	X	A	B	A	A	A	B	B	B	B	X	A	A	B
AX-108926113	6	1.691	B	B	B	A	B	B	B	A	B	B	X	B	X	A	B	B	A	B	A	B	B	B	B	A	A	B	B	X	B	A	A	A	B	X	A	B	A	A	A	B	B	B	B	X	A	A	B
AX-110582884	6	2.467	X	B	X	A	A	B	B	A	B	B	X	B	A	A	B	B	A	B	A	B	B	B	X	A	A	B	B	X	B	A	A	A	X	X	A	X	A	A	A	B	B	X	B	A	A	A	B
AX-111916187	6	3.343	B	B	X	A	A	A	B	A	B	B	X	B	X	A	B	B	A	B	A	B	B	B	B	A	A	B	X	X	B	A	A	A	B	X	A	B	A	A	A	B	B	X	B	X	A	A	B
AX-111416794	6	4.788	A	B	X	A	A	A	B	A	B	B	X	B	X	A	B	B	A	B	A	B	A	B	B	A	X	B	X	X	B	A	A	A	X	X	A	B	A	A	A	B	B	X	B	X	A	A	B
AX-111508786	6	9.025	X	B	A	B	A	A	B	A	B	B	X	A	A	A	B	B	A	B	A	B	A	B	X	A	X	B	A	A	B	A	A	A	X	A	A	X	A	A	A	B	A	A	B	A	A	X	A
AX-109310938	6	9.58	B	B	A	B	A	A	B	A	B	B	X	A	X	A	B	B	A	B	A	B	X	B	B	A	X	B	X	X	B	A	A	A	X	X	A	B	A	A	A	B	A	X	B	A	A	B	A
AX-109901197	6	10.138	B	B	A	B	A	A	B	A	B	B	B	A	X	A	B	B	A	B	A	B	X	B	B	A	B	B	X	X	B	A	A	B	B	X	A	B	A	A	A	B	A	X	B	X	A	B	A
AX-109242530	6	13.054	B	B	A	X	A	A	B	A	B	B	B	A	X	A	B	B	A	B	A	B	A	B	B	A	X	B	X	X	B	A	A	B	B	X	A	B	A	A	A	B	A	B	B	X	A	A	A
AX-109935325	6	13.387	B	B	A	X	A	A	B	A	B	B	X	A	X	A	B	B	A	B	A	B	A	B	B	A	X	B	X	X	B	A	A	B	B	X	A	B	A	A	A	B	A	B	B	X	A	A	A
AX-110413771	6	19.058	B	B	A	B	A	B	B	B	B	B	B	A	X	A	B	B	A	B	X	B	A	B	X	A	B	B	B	A	B	A	A	B	B	X	A	X	A	A	X	A	A	B	B	B	A	A	X
AX-111021196	6	21.282	B	B	A	B	A	B	B	B	B	B	X	A	X	A	B	B	A	B	X	B	A	B	X	A	B	B	X	A	B	A	A	B	B	X	A	X	A	B	B	X	A	B	B	B	A	A	A
AX-109842248	6	23.256	B	B	A	B	A	B	B	B	B	B	X	A	X	A	B	B	A	B	X	B	A	B	X	A	B	B	B	A	B	A	A	B	B	X	A	X	A	B	B	X	A	B	B	B	B	A	A
AX-108991361	6	23.477	B	B	A	B	A	B	B	B	B	B	X	A	X	A	B	B	A	B	X	B	A	B	X	A	B	B	B	A	B	A	A	B	B	X	A	X	A	B	B	A	A	B	B	B	B	A	B
AX-89728114	6	27.66	B	A	A	B	A	B	B	X	B	B	X	B	X	A	B	B	A	B	A	B	A	B	A	A	B	B	A	A	B	A	A	B	B	B	A	X	A	B	B	X	A	A	B	B	B	A	B
AX-109356565	6	28.154	B	A	A	B	A	B	B	X	B	B	A	B	X	A	B	B	A	B	A	B	A	B	A	A	A	B	A	X	B	A	A	B	B	B	A	X	A	B	B	X	A	A	B	B	B	A	B
AX-111696354	6	31.258	B	A	A	A	A	X	B	X	B	B	A	A	A	A	B	B	A	B	A	B	A	B	A	A	A	X	A	A	B	A	A	B	B	B	B	X	A	B	B	B	A	A	B	B	B	A	A
AX-111707760	6	32.332	B	A	A	X	A	X	B	X	B	B	A	A	A	A	B	B	A	B	A	B	A	B	A	A	A	X	A	A	B	A	A	B	B	B	B	X	A	B	A	B	A	A	B	X	B	A	A
AX-109836946	6	41.651	B	A	A	X	A	X	B	X	B	B	A	A	A	A	B	B	A	B	A	B	A	A	X	A	A	B	A	A	B	A	A	A	A	B	B	B	A	B	A	B	A	A	B	B	B	A	B
AX-111956072	6	44.589	B	A	A	X	A	X	B	X	B	B	A	A	A	A	B	B	A	B	X	B	A	A	X	B	A	B	A	X	X	A	A	A	A	B	B	A	A	A	A	X	A	A	B	B	B	A	B
AX-86163393	6	46.154	B	A	A	X	A	X	B	X	B	B	A	A	A	A	B	B	A	B	B	B	A	A	B	B	A	A	A	X	X	A	A	A	A	B	B	A	A	A	A	X	A	A	B	B	B	A	A
AX-111087066	6	49.276	B	A	A	X	A	X	B	B	B	B	A	A	A	B	B	B	A	B	X	B	A	A	B	B	A	B	X	A	B	A	A	A	A	B	B	A	A	A	X	X	A	A	B	B	B	A	B
AX-110074419	6	52.004	B	B	A	A	A	X	B	B	B	B	A	A	A	B	B	B	A	B	B	B	A	A	B	B	A	B	X	A	X	X	A	A	A	B	B	X	A	A	X	X	A	A	B	A	B	A	B
AX-111907126	6	52.389	X	B	A	A	A	X	B	B	B	B	A	A	A	B	B	B	A	B	X	B	A	A	B	B	A	B	X	A	B	A	A	A	A	B	B	A	A	A	X	X	A	A	B	A	B	A	B
AX-110384776	6	57.623	B	B	A	A	A	B	B	B	B	B	A	A	X	B	B	B	A	B	X	A	A	A	B	B	A	A	X	X	X	A	A	A	A	B	B	A	A	B	A	B	A	X	B	A	B	A	A
AX-109785183	6	58.778	B	B	A	A	A	B	B	B	B	B	A	A	X	X	B	B	A	B	X	A	A	A	B	A	A	A	X	X	X	A	A	A	A	X	B	A	A	B	A	B	A	X	B	A	B	A	A
AX-89675016	6	65.554	B	B	A	A	A	B	B	B	B	B	A	A	B	X	B	A	A	A	B	A	A	A	B	A	A	A	B	X	X	A	A	A	A	B	B	X	A	B	A	B	B	A	B	A	B	A	A
AX-110010601	6	68.75	X	B	A	A	A	B	B	B	B	B	A	A	X	X	B	A	A	A	X	B	A	A	B	A	A	A	B	X	X	A	A	A	A	X	A	A	A	B	A	B	B	A	A	A	B	A	B
AX-110289516	6	69.368	X	B	A	A	A	B	B	B	B	B	A	A	X	X	B	A	X	A	X	A	A	A	B	A	A	A	B	X	X	A	A	A	A	B	A	A	A	B	A	X	B	A	A	A	B	A	B
AX-109470775	6	72.929	B	B	A	A	A	B	B	B	B	B	A	A	B	X	B	A	A	A	B	B	A	A	B	A	A	A	B	X	B	A	A	A	A	B	B	A	A	B	A	B	B	B	A	X	B	A	B
AX-89644784	6	74.581	X	B	A	A	A	B	B	B	B	B	A	A	X	X	B	A	A	A	B	B	A	A	B	A	A	A	B	B	X	A	A	A	A	A	B	A	A	B	A	B	B	B	A	A	B	A	B
AX-110999397	6	79.449	B	B	X	A	A	B	B	B	B	B	A	A	X	X	B	A	A	A	B	A	X	B	B	A	A	A	B	X	B	A	A	A	A	A	B	X	A	B	A	B	B	B	A	A	B	A	A
AX-109546505	6	84.83	X	B	X	A	A	B	B	B	B	B	A	A	X	B	B	A	A	A	B	A	B	B	B	A	A	A	B	X	B	A	A	A	A	X	B	B	A	A	A	A	B	B	A	A	B	A	B
AX-111078941	6	85.59	B	B	B	A	A	B	B	B	B	B	A	A	X	B	B	A	A	A	B	A	B	B	B	A	A	A	B	X	B	A	A	A	A	X	B	B	A	A	A	A	B	B	A	X	B	A	B
AX-111589892	6	87.184	X	B	X	A	X	X	B	B	B	B	A	A	X	B	B	A	A	A	B	A	B	B	B	A	A	A	B	X	X	A	A	A	A	X	B	B	A	A	X	A	B	B	A	A	X	A	A
AX-108795510	6	88.379	X	B	B	A	A	A	B	B	B	B	A	A	A	B	B	A	A	A	B	A	B	B	B	A	A	A	B	A	B	A	A	X	A	A	B	X	A	A	A	A	B	B	A	X	B	A	A
AX-89536198	6	89.251	X	B	B	A	A	A	B	B	B	B	X	A	X	B	B	A	A	A	B	A	B	B	B	A	A	A	B	A	B	A	A	X	A	B	B	B	A	A	A	A	B	B	A	X	B	A	B
AX-109627624	6	90.276	X	B	B	A	A	A	B	B	B	B	X	A	A	B	B	A	A	A	B	A	B	B	B	A	A	A	B	A	B	A	A	X	A	B	B	B	A	A	A	A	B	B	A	X	B	A	B
AX-108743157	6	90.454	X	B	B	A	A	A	B	B	B	B	X	A	A	B	B	A	A	A	B	A	B	B	B	A	A	A	B	A	B	A	A	X	A	B	B	B	A	A	A	A	B	B	A	X	B	A	B
AX-109316026	6	90.796	X	B	B	A	A	A	B	B	B	B	X	A	X	B	B	A	A	A	B	A	B	B	B	A	A	A	B	A	B	A	A	X	A	B	B	B	A	A	A	A	B	B	A	X	B	A	B
AX-110840792	6	91.206	X	B	B	A	A	A	B	B	B	B	X	A	X	B	B	A	A	A	B	A	B	B	B	A	A	A	B	X	B	X	A	X	A	B	B	B	A	A	A	A	B	B	A	X	A	A	B
AX-108913601	6	92.05	B	B	B	A	A	A	B	B	B	B	X	A	X	B	B	A	A	A	B	A	B	B	B	A	A	A	B	X	B	X	A	A	A	B	B	B	A	A	A	A	B	B	A	A	A	A	B
AX-109520460	6	92.294	X	B	B	A	A	A	B	B	B	B	B	A	X	B	B	A	A	A	B	A	B	B	B	A	A	A	B	X	B	X	A	A	A	B	B	X	A	A	A	A	B	B	A	A	A	A	B
AX-110734111	6	92.626	B	B	B	A	A	A	B	B	B	B	X	A	X	B	B	A	A	B	X	A	B	B	B	A	A	A	B	A	B	X	A	X	A	B	B	B	A	A	A	A	B	B	A	X	A	A	B
AX-109501942	6	93.099	X	B	B	A	A	A	B	B	B	B	X	A	X	B	B	A	A	B	X	A	B	B	B	A	A	A	B	A	B	A	A	A	A	B	B	A	A	A	A	A	B	B	A	A	A	A	B
AX-109953195	6	94.259	X	B	B	A	A	A	B	B	B	B	X	A	X	B	B	A	A	B	X	A	B	B	B	A	A	A	B	A	B	A	A	X	A	B	B	A	A	A	A	A	B	B	A	X	A	A	B
AX-111138700	6	94.745	X	B	B	A	A	A	B	B	A	B	X	A	X	B	B	A	A	B	X	A	B	B	B	A	A	A	B	A	B	A	A	X	A	X	B	A	A	A	A	A	B	B	A	X	A	A	B
AX-110458487	6	94.93	X	B	B	A	A	A	B	B	A	B	X	A	X	B	B	A	A	B	X	A	B	B	B	A	A	A	B	A	B	A	A	X	A	B	B	A	A	A	A	A	B	B	A	X	A	A	B
AX-109809931	6	95.053	B	B	B	A	A	A	B	B	A	B	X	A	X	B	B	A	A	B	X	A	B	B	B	A	A	A	B	A	B	A	A	A	A	B	B	A	A	A	A	A	X	B	A	X	A	A	B
AX-110010295	6	95.568	X	B	B	A	A	A	B	B	A	B	X	A	X	B	B	A	A	B	X	A	B	B	B	A	A	A	B	A	B	A	A	A	A	B	B	A	A	A	A	A	B	B	A	A	A	A	A
AX-110558245	6	96.373	X	B	B	A	A	A	B	B	A	B	X	A	X	B	B	A	A	B	X	A	B	B	B	A	A	A	B	A	B	A	A	X	A	B	B	A	A	A	A	A	B	B	A	X	A	A	B
AX-109580345	6	96.936	X	B	B	A	A	A	B	B	A	B	X	A	X	B	B	A	A	B	X	A	B	B	B	A	A	A	B	A	B	A	A	A	A	B	B	A	A	A	A	A	B	B	A	X	A	A	B
AX-109204810	6	99.384	X	B	B	A	A	A	B	B	A	B	X	A	X	B	A	A	A	A	A	B	B	B	B	A	A	A	B	X	B	A	A	A	A	B	B	A	A	A	A	A	B	B	A	X	A	A	B
AX-110868681	6	100.011	X	B	B	A	A	A	B	B	A	B	X	X	X	B	A	A	A	A	X	B	B	B	B	X	A	A	B	X	B	A	A	A	A	B	B	A	A	A	A	A	B	B	A	X	A	A	A
AX-109408646	6	100.635	X	B	B	A	A	A	B	B	A	B	X	X	X	B	A	A	A	X	X	B	B	B	B	A	A	A	B	X	B	A	A	A	A	B	B	A	A	A	A	A	B	B	A	X	A	A	A
AX-108830243	6	101.042	X	B	B	A	A	A	B	B	A	B	B	X	X	B	A	A	A	A	X	B	B	B	B	A	A	A	B	B	B	A	A	A	A	B	B	A	A	A	A	A	B	B	A	X	A	A	A
AX-110975801	6	101.345	A	B	B	A	A	A	B	B	A	B	X	X	X	B	A	A	A	A	X	B	B	B	B	A	A	A	B	X	B	A	A	A	A	B	B	A	A	A	A	A	A	B	A	X	A	A	A
AX-109014614	6	101.794	A	B	B	A	A	A	B	B	A	B	X	X	X	B	A	A	A	A	X	B	B	B	B	A	A	A	B	X	B	A	A	A	A	B	B	A	A	A	A	A	A	B	A	X	A	A	A
AX-108854020	6	102.181	A	B	B	A	A	A	B	B	A	B	B	X	A	B	A	A	X	A	X	B	B	B	B	A	A	A	B	X	B	A	A	B	A	B	B	A	A	A	A	A	A	B	A	X	A	A	A
AX-109395807	6	103.269	A	B	B	A	A	A	B	B	A	B	B	X	A	B	A	A	X	A	X	B	B	B	B	A	A	A	B	X	B	A	A	B	A	B	B	A	A	A	A	A	A	B	A	X	A	A	A
AX-109881121	6	103.499	A	B	X	A	A	A	B	B	A	B	B	X	A	B	A	A	X	A	X	B	B	B	B	A	A	A	B	X	B	A	A	B	A	B	B	A	A	A	A	A	A	B	A	X	B	A	A
AX-110987726	6	104.81	A	B	X	A	A	A	B	B	A	B	B	X	A	B	A	A	X	A	X	B	B	B	B	A	A	A	B	X	B	A	A	B	A	B	B	A	A	A	A	A	A	B	A	X	B	A	A
AX-109453449	6	106.147	A	B	X	A	A	A	B	B	A	B	B	X	A	B	A	A	B	A	X	B	B	B	B	A	A	A	B	X	B	A	A	B	A	B	B	A	A	A	A	A	A	B	A	X	B	A	A
AX-108926296	6	106.369	A	B	X	A	A	A	B	B	A	B	B	X	A	B	A	A	X	A	X	B	B	B	B	A	A	A	B	X	B	A	A	B	A	B	B	A	A	A	A	A	A	B	A	X	B	A	A
AX-110982403	6	106.732	X	B	B	A	A	A	B	B	A	B	B	X	A	B	A	A	B	A	X	B	B	B	A	A	A	A	B	B	B	A	A	B	A	B	B	B	A	A	A	A	A	B	A	X	B	A	A
AX-111494833	6	106.877	A	B	X	A	A	A	B	B	A	B	B	X	A	B	A	A	X	A	X	B	B	B	A	A	A	A	B	X	B	A	A	B	A	B	B	B	A	A	A	A	A	B	A	A	B	A	A
AX-109059601	6	107.414	A	B	X	A	B	A	B	B	A	B	B	X	A	B	A	A	X	A	X	B	B	B	A	A	A	A	B	B	B	A	A	B	A	B	B	B	A	A	A	A	A	B	A	X	B	A	A
AX-109972625	6	107.615	A	B	X	X	B	A	B	B	A	B	B	X	A	B	A	A	X	A	X	B	B	B	A	A	A	A	B	X	B	A	A	B	A	B	B	A	A	A	A	A	A	B	A	A	B	A	A
AX-109459272	6	108.608	A	B	X	X	B	A	B	B	B	B	B	X	A	B	A	A	X	A	X	B	B	B	A	A	A	A	B	X	B	A	A	B	A	X	B	A	A	A	A	A	A	B	A	X	B	A	A
AX-111601893	6	109.751	A	B	X	X	B	A	B	B	B	B	B	X	A	B	A	A	X	A	X	B	B	B	A	A	A	A	B	B	B	A	A	B	A	B	B	A	A	A	A	A	A	B	A	X	B	A	A
AX-89629279	6	110.255	A	B	X	X	B	A	B	B	B	B	B	X	A	B	A	A	X	A	X	B	B	B	A	A	A	A	B	X	B	A	A	B	A	X	B	A	A	A	A	A	A	B	A	X	B	A	A
AX-111318850	6	110.394	A	B	X	X	B	A	B	B	B	B	B	X	A	B	A	A	X	A	X	B	B	B	A	A	A	A	B	X	B	A	A	B	A	X	B	A	A	A	A	A	A	B	A	X	B	A	A
AX-108902405	6	111.475	A	B	X	X	B	A	B	B	B	B	B	X	X	B	A	A	X	A	X	B	B	B	A	A	A	A	B	X	B	A	A	B	A	X	B	A	A	A	A	A	A	B	A	X	B	A	A
AX-110602820	6	112.009	A	B	X	X	B	A	B	B	B	B	B	X	A	B	A	A	B	A	X	B	B	B	A	A	A	A	B	B	B	A	A	B	A	X	B	A	A	A	A	A	A	B	A	X	B	A	A
AX-111538812	6	113.269	A	B	X	X	B	A	B	B	B	B	B	X	X	B	A	A	X	A	X	B	B	B	A	A	A	A	B	X	B	A	A	B	A	X	B	A	B	A	A	A	B	B	A	A	B	A	A
AX-111341034	6	113.66	X	B	X	A	B	A	B	B	B	B	B	X	X	B	A	A	B	A	X	B	B	B	A	A	A	A	B	X	B	A	A	B	A	B	B	A	B	A	A	A	B	B	A	X	B	A	A
AX-110998078	6	113.809	X	B	X	A	B	A	B	B	B	B	B	X	X	B	A	A	B	A	X	B	B	B	A	A	A	A	B	X	B	A	A	B	A	X	B	A	B	A	A	A	B	B	A	X	B	A	A
AX-109351097	6	114.033	X	B	X	A	B	X	B	B	B	B	B	X	X	B	A	A	X	A	X	B	B	B	A	A	A	A	B	B	B	A	A	B	A	X	B	A	B	A	A	A	B	B	A	X	B	A	A
AX-109421761	6	114.174	X	B	X	A	B	A	B	B	B	B	B	X	X	B	A	A	X	A	X	B	B	B	A	A	A	A	B	X	B	A	A	B	A	X	B	A	B	A	A	A	B	B	A	X	B	A	A
AX-109035593	6	114.706	X	B	B	A	B	A	B	B	B	B	B	X	X	B	A	A	X	A	X	B	B	B	A	A	A	A	B	B	B	A	A	B	A	B	B	A	B	A	A	A	B	B	A	X	B	A	A
AX-111915441	6	114.794	A	B	B	A	B	A	B	B	B	B	B	X	X	B	A	A	X	A	X	B	B	X	A	A	A	A	B	X	B	A	A	B	A	X	B	A	B	A	A	A	B	B	A	X	B	A	A
AX-111497459	6	115.104	X	B	B	A	B	A	B	B	B	B	B	X	X	B	A	A	X	A	X	B	B	X	A	A	A	A	B	X	B	A	A	X	A	X	B	A	B	A	A	A	B	B	A	X	B	A	A
AX-110706065	6	116.016	X	B	B	A	B	A	B	B	B	B	B	X	X	B	A	A	X	A	X	B	B	X	A	A	A	A	B	B	B	A	A	B	A	B	B	A	B	A	A	A	B	B	A	X	B	A	A
AX-110535834	6	118.471	X	B	B	A	B	A	B	B	B	B	B	X	X	B	A	B	B	X	X	B	B	B	A	A	A	A	B	X	B	A	A	A	A	B	B	A	B	X	A	A	B	B	A	X	B	A	A
AX-109326513	6	124.241	X	B	B	A	B	A	B	B	B	B	B	A	A	B	A	B	B	X	A	A	B	B	A	A	B	A	B	X	B	A	A	A	A	B	B	A	B	A	A	A	B	B	A	A	B	B	A
AX-108953669	6	129.117	B	B	B	A	B	A	A	B	B	B	B	A	B	B	A	B	B	X	A	A	B	B	A	B	B	A	X	B	A	A	A	A	A	B	B	A	B	A	A	A	B	B	X	X	B	B	A
AX-109449021	6	131.316	B	B	B	A	A	A	A	B	A	B	B	A	B	B	A	B	B	B	A	A	B	B	A	B	B	A	X	B	X	A	A	A	A	B	B	A	B	A	A	A	B	B	X	A	B	B	A
AX-110462142	6	133.33	B	B	B	X	A	A	A	B	A	B	B	A	B	B	A	B	B	B	A	A	B	B	A	B	B	A	X	B	X	A	A	A	A	B	B	A	B	A	B	A	B	B	X	X	B	B	B
AX-109570221	6	138.159	B	B	X	A	A	A	A	B	A	B	B	A	B	B	A	B	B	B	A	A	A	B	A	B	B	B	A	B	X	A	A	B	A	X	A	A	B	A	A	A	B	B	X	X	B	A	A
AX-94537702	6	140.157	B	B	X	X	A	A	A	B	X	A	B	A	B	B	A	B	B	A	A	A	A	B	A	B	B	B	A	X	X	A	A	B	A	B	B	A	B	A	A	A	B	B	X	A	B	A	A
AX-108890079	6	141.201	B	B	B	X	A	A	A	B	B	B	B	A	B	B	A	B	B	A	A	A	A	B	A	B	B	B	A	X	X	A	A	B	A	B	B	A	B	A	A	A	B	B	B	X	B	A	A
AX-108784363	6	142.156	B	B	B	X	A	A	A	B	B	X	B	A	B	B	A	B	B	A	A	A	A	B	A	B	B	B	A	X	X	A	A	B	A	B	B	A	B	A	B	A	B	B	X	X	B	A	B
AX-110278405	6	152.624	B	B	B	A	A	A	A	B	A	A	X	A	A	A	B	A	B	A	B	B	A	B	X	B	B	B	B	B	B	A	A	B	X	X	B	A	B	A	B	A	B	B	A	X	B	A	B
AX-110781883	6	153.225	A	B	B	X	A	A	A	B	A	A	X	A	A	A	B	A	B	X	B	B	A	B	B	B	B	B	B	B	B	A	A	B	X	B	B	A	B	A	B	A	B	B	A	X	B	A	B
AX-109249503	6	154.582	B	B	B	X	A	A	A	B	A	A	X	A	A	A	B	A	B	X	B	B	A	B	B	B	B	B	B	B	B	A	A	B	A	B	B	A	B	A	B	A	B	B	A	X	B	A	B
AX-110121921	7	0	A	A	B	X	B	B	B	B	B	B	A	A	A	A	B	A	B	B	X	A	A	B	A	B	B	B	A	B	B	A	B	B	B	X	A	A	A	B	B	B	X	A	A	B	A	B	A
AX-110583216	7	0.327	A	A	B	B	B	B	B	B	B	B	A	A	A	A	B	X	B	B	A	A	A	B	A	B	B	B	A	B	B	A	B	B	B	X	A	A	A	B	B	B	X	A	A	X	A	B	A
AX-110430561	7	0.425	A	A	B	X	B	B	B	B	B	B	A	A	A	A	B	A	B	B	X	A	A	B	X	B	B	B	A	X	X	A	B	B	B	X	A	A	A	B	B	B	A	A	A	B	A	X	B
AX-109523942	7	0.463	X	A	B	X	B	B	B	B	B	B	A	A	A	A	B	X	B	B	X	A	A	B	X	B	B	B	A	X	B	A	B	B	B	B	A	X	A	B	B	B	A	A	A	B	A	B	B
AX-110931095	7	1.278	A	A	B	X	B	B	B	B	B	B	A	A	A	A	B	X	B	B	A	A	A	B	A	B	B	B	A	X	B	A	B	B	B	X	A	A	A	B	B	B	A	A	A	B	A	B	B
AX-109295444	7	2.093	A	X	B	B	B	B	B	B	B	B	A	A	A	A	B	A	B	B	A	A	A	B	A	B	B	B	A	X	B	A	B	B	B	X	A	A	A	B	B	B	X	A	A	B	A	B	A
AX-109964112	7	2.272	A	A	B	A	B	B	B	B	B	B	A	A	A	A	B	X	B	B	X	A	A	B	A	B	B	A	A	X	B	A	B	B	B	X	A	A	A	B	X	B	X	A	A	B	A	B	A
AX-111070376	7	2.359	A	A	B	A	B	B	B	B	B	B	A	A	A	A	B	A	B	B	X	A	A	B	A	B	B	A	A	X	B	A	B	B	B	X	A	A	A	B	X	B	X	A	A	B	A	B	A
AX-109061253	7	2.49	A	A	B	A	B	B	B	B	B	B	A	A	A	A	B	A	B	B	A	A	A	B	A	B	B	A	A	B	B	A	B	B	B	A	A	A	A	B	A	B	A	A	A	X	A	B	A
AX-110418688	7	2.768	A	A	B	A	B	B	B	B	B	B	A	A	A	A	B	A	B	B	X	A	A	B	A	B	B	A	A	X	B	A	B	B	B	X	A	X	A	B	X	B	X	A	A	B	A	B	A
AX-111009320	7	2.928	A	A	B	A	B	B	B	B	B	B	A	A	A	A	B	X	B	B	X	A	A	B	A	B	B	A	A	X	B	A	B	B	B	X	A	A	A	B	B	B	X	A	A	B	A	B	A
AX-108879623	7	3.148	A	A	B	X	B	B	B	B	B	B	A	A	A	A	B	A	B	B	A	A	A	B	A	B	B	A	A	X	B	A	B	B	B	X	A	A	A	B	X	B	X	A	A	B	A	B	A
AX-109312696	7	4.064	A	A	B	X	B	B	B	B	B	B	A	A	A	A	B	A	B	B	A	A	A	B	A	B	B	A	A	X	B	A	B	B	B	X	A	A	A	B	X	B	X	A	A	B	A	B	A
AX-110552246	7	5.388	A	B	B	X	B	B	B	B	B	B	A	A	A	A	B	A	B	B	A	A	A	B	A	B	B	A	A	X	B	A	B	B	B	X	A	A	A	B	X	B	X	A	A	B	A	B	A
AX-110168998	7	6.967	A	B	B	A	B	B	B	B	B	B	A	A	A	A	B	X	B	B	X	A	A	B	A	B	B	A	B	X	B	A	B	B	B	X	A	A	A	B	X	B	X	A	A	B	A	B	A
AX-109985167	7	7.268	A	B	B	X	B	B	B	B	B	B	A	A	A	A	B	X	B	B	A	A	A	B	A	B	B	A	B	B	B	A	B	B	B	X	A	A	A	B	X	B	X	A	A	B	A	B	A
AX-111154447	7	8.24	A	B	B	A	B	B	B	B	B	B	X	A	A	A	B	X	B	B	X	A	A	B	A	B	B	A	B	X	B	A	B	B	B	X	A	A	A	B	X	B	X	A	A	X	A	B	A
AX-109867787	7	8.482	A	B	B	X	B	B	B	B	B	B	X	A	A	A	B	A	B	B	A	A	A	B	A	B	B	A	B	X	B	A	B	B	B	X	A	A	A	B	X	B	X	A	A	B	A	B	A
AX-108873891	7	9.302	A	B	B	X	B	B	B	B	B	B	X	A	A	A	B	X	B	B	X	A	A	B	A	B	B	B	B	X	B	A	B	B	B	X	A	A	A	B	X	B	X	A	A	B	A	B	A
AX-111586933	7	9.906	A	X	B	B	B	B	B	B	B	B	X	A	A	A	B	A	B	X	X	A	A	B	A	B	B	B	B	B	B	A	B	B	B	X	A	A	A	B	B	B	X	A	A	B	A	B	A
AX-111223386	7	10.69	A	B	B	B	B	B	B	B	B	B	X	A	A	A	B	A	B	B	X	A	A	B	A	B	B	B	B	B	B	A	B	B	B	X	A	A	A	B	B	B	X	A	A	B	A	B	A
AX-111270453	7	11.439	A	B	B	B	B	B	B	B	B	B	B	A	A	A	B	A	B	B	X	A	A	B	A	B	B	B	B	B	B	A	B	B	B	X	A	A	A	B	B	B	X	A	A	B	A	B	A
AX-95684389	7	13.074	A	B	B	B	B	B	B	B	B	B	X	A	A	A	B	A	A	B	X	A	A	B	A	B	B	B	B	B	B	A	B	B	B	X	A	A	A	B	B	B	X	A	A	B	A	B	A
AX-108747241	7	13.396	X	B	B	X	B	B	B	B	B	B	X	A	A	A	B	X	A	B	X	A	A	B	A	B	B	B	B	B	B	A	B	B	B	X	A	A	A	B	B	B	X	A	A	X	A	B	A
AX-109521891	7	14.45	A	B	B	B	B	B	A	B	B	B	A	A	A	A	B	A	A	B	A	A	A	B	A	B	B	B	B	B	B	A	B	B	B	X	A	A	A	B	B	B	X	A	A	X	A	B	A
AX-111047459	7	20.963	A	B	B	X	X	B	A	B	B	B	A	A	A	A	A	X	A	B	A	A	A	B	A	B	B	B	B	X	B	A	B	B	B	A	A	A	A	B	B	B	X	A	B	X	A	B	A
AX-111576809	7	21.824	A	B	B	X	X	B	A	B	B	A	X	A	A	A	A	X	A	B	A	A	A	B	A	B	B	B	B	X	B	A	B	B	B	A	A	A	A	B	B	B	X	A	B	X	A	B	A
AX-109486695	7	22.377	X	B	B	X	A	B	A	B	B	A	X	A	A	A	A	B	A	B	A	A	A	B	A	B	B	B	B	X	B	A	B	B	B	A	A	A	A	B	B	B	B	A	B	X	A	B	A
AX-110073069	7	28.604	A	A	B	X	X	B	A	X	B	A	A	A	A	A	A	X	A	B	X	B	A	B	A	B	B	B	B	X	B	A	B	B	B	A	A	X	B	B	B	B	B	A	B	X	A	A	A
AX-109311057	7	30.385	X	A	B	X	A	B	A	X	B	A	A	A	A	A	A	A	A	B	X	B	A	B	A	B	B	B	B	X	B	A	B	B	B	A	A	A	B	B	A	B	B	A	B	X	A	A	A
AX-111048385	7	30.992	A	A	B	X	A	B	A	X	B	A	A	A	A	A	A	X	A	B	A	B	A	B	A	B	B	B	B	X	B	A	B	B	B	A	A	A	B	B	A	B	B	A	X	X	A	A	A
AX-111279439	7	31.584	B	A	B	B	X	B	A	B	B	A	A	A	A	A	A	B	A	B	X	B	A	B	A	B	B	B	B	B	B	A	B	B	B	A	A	X	B	B	A	B	B	A	B	B	A	A	A
AX-108747099	7	32.78	X	A	A	A	A	A	B	X	A	B	B	A	B	A	B	B	A	B	X	X	A	A	B	A	A	B	A	A	A	B	X	B	A	B	A	X	B	A	A	A	A	A	A	B	X	B	X
AX-109906752	7	39.266	B	A	B	X	B	A	A	X	B	A	A	A	A	B	B	X	A	B	A	A	A	A	A	B	B	B	X	B	B	X	B	B	B	A	A	A	B	B	B	B	B	A	B	X	B	A	B
AX-111041626	7	39.66	B	A	B	X	B	A	A	X	B	A	A	A	A	B	B	A	A	B	X	A	A	A	A	B	B	B	X	B	B	A	B	B	B	A	A	A	B	B	B	X	B	A	B	X	B	A	A
AX-111694132	7	40.228	B	A	B	X	B	A	A	X	B	A	A	A	A	B	B	X	A	B	X	A	A	A	A	B	B	B	X	B	B	X	B	B	B	A	A	A	B	B	B	B	B	A	B	X	B	B	A
AX-108729295	7	41.148	B	A	B	X	B	A	A	A	B	A	A	A	A	B	B	X	A	B	A	A	A	A	A	B	X	A	X	X	B	A	B	B	B	A	A	A	B	B	B	B	B	A	B	A	B	B	B
AX-108781594	7	42.138	B	A	B	X	B	A	A	X	B	A	A	A	A	B	B	X	A	B	X	A	A	A	A	B	B	A	B	B	B	X	A	B	B	A	A	A	B	B	B	B	B	A	B	B	B	B	A
AX-108832448	7	43.349	B	X	A	A	A	A	B	X	A	B	B	A	B	B	B	B	B	B	A	B	A	X	B	A	A	B	A	B	A	B	X	B	B	B	A	B	B	A	A	A	A	B	A	X	B	B	B
AX-108792631	7	44.566	B	A	A	X	X	A	A	X	B	A	A	A	A	B	B	X	A	B	X	A	A	A	A	B	B	A	B	B	B	X	A	B	B	X	A	B	B	B	B	B	B	A	B	X	B	B	A
AX-109854420	7	44.981	X	A	A	X	A	A	A	X	B	A	A	A	A	B	B	X	A	B	A	A	A	A	A	B	X	A	X	B	B	X	A	B	B	A	A	X	B	B	B	B	B	A	B	X	B	B	A
AX-110168713	7	45.137	B	X	A	X	X	A	A	X	B	A	A	A	A	B	B	X	A	B	A	A	A	A	A	B	B	A	B	B	B	X	A	B	B	X	A	B	B	B	B	B	B	A	B	X	B	B	A
AX-109895824	7	45.161	B	A	A	A	A	A	B	X	A	B	B	A	B	B	B	B	B	B	X	B	A	X	B	A	A	B	A	B	A	B	X	B	B	B	A	B	B	A	A	A	A	B	A	B	B	B	B
AX-110018194	7	45.432	B	A	A	A	A	A	B	X	A	B	B	A	B	B	B	B	B	B	X	B	A	X	B	A	A	B	A	B	A	B	X	B	B	B	A	B	B	A	A	A	A	B	A	B	B	B	B
AX-111699446	7	45.689	B	A	A	X	A	A	A	X	B	A	A	A	A	B	B	X	A	B	X	A	A	A	A	B	X	A	X	B	B	X	A	B	B	X	A	B	B	B	B	B	B	A	B	X	B	B	A
AX-109340041	7	45.723	X	A	A	A	A	A	B	A	A	B	B	A	X	B	B	B	B	B	A	B	A	A	B	A	A	B	A	B	A	B	A	B	X	B	A	B	B	A	A	A	A	B	A	X	B	B	B
AX-111108822	7	45.924	X	A	A	X	A	A	A	X	B	A	A	A	A	B	B	X	A	B	X	A	A	A	A	B	B	A	B	B	B	X	A	B	B	X	A	B	B	B	B	B	B	A	B	X	B	B	A
AX-110403966	7	47.349	B	A	A	X	A	A	A	X	B	A	A	A	A	B	B	X	A	B	A	A	A	A	A	B	B	A	X	B	B	X	A	B	B	X	A	B	B	B	B	B	B	A	B	X	B	B	B
AX-108818285	7	47.722	B	X	A	X	A	A	A	X	B	A	A	A	A	B	B	X	A	B	A	A	A	A	A	B	X	A	X	X	B	A	A	B	B	A	A	X	B	B	B	B	B	A	B	X	B	B	B
AX-109405558	7	48.524	B	A	A	X	A	A	A	X	B	A	A	A	A	B	B	X	A	B	A	A	A	A	A	B	B	A	X	X	B	X	A	B	B	X	A	B	B	B	B	B	B	A	B	B	B	B	B
AX-108940806	7	49.073	B	A	A	X	X	A	A	X	B	A	A	A	A	B	B	X	A	B	A	A	A	A	A	B	B	A	X	B	B	X	A	A	B	X	A	B	B	B	B	B	B	A	B	X	B	B	A
AX-110478177	7	51.382	B	A	A	A	A	A	A	X	B	A	A	A	A	B	B	B	A	B	A	A	A	A	A	B	B	A	B	B	B	X	A	B	B	A	A	B	A	B	B	B	B	A	B	X	B	B	B
AX-109387633	7	52.147	B	A	A	X	B	A	A	X	B	A	A	A	B	B	B	B	A	B	A	A	A	A	A	B	B	A	X	B	B	X	A	B	X	X	A	B	A	B	B	B	B	A	B	X	B	B	B
AX-110721315	7	54.269	B	A	A	X	A	A	A	X	B	A	A	A	A	B	B	A	A	B	A	A	A	A	A	B	B	A	X	B	B	X	A	A	B	X	A	B	B	B	A	B	B	A	B	X	B	B	A
AX-111802923	7	55.064	B	A	B	X	A	A	B	A	A	B	B	A	B	B	A	B	B	X	X	B	A	X	B	X	A	B	X	B	B	B	X	B	B	B	A	B	B	A	A	A	B	A	A	B	B	B	B
AX-110491100	7	55.534	B	X	A	X	A	A	A	X	B	A	A	A	A	B	B	A	A	B	A	A	A	A	A	B	B	A	X	B	B	X	A	A	B	X	A	B	A	B	A	B	B	A	B	X	B	B	A
AX-110587728	7	56.799	B	A	B	A	A	A	B	A	A	B	B	A	B	B	A	X	B	X	X	B	A	X	B	B	A	B	X	B	B	B	X	X	B	B	A	B	B	A	A	A	B	A	A	X	B	B	B
AX-110671124	7	59.486	B	A	B	B	A	A	B	A	A	B	B	A	X	B	A	A	B	A	A	B	A	A	B	B	A	X	X	B	B	B	X	X	X	B	A	B	B	A	A	A	B	A	A	B	B	B	B
AX-109407758	7	60.959	B	A	B	B	A	A	A	A	A	B	B	A	B	B	A	A	B	X	X	B	A	X	B	B	A	X	X	B	B	B	X	X	B	B	A	B	B	A	A	A	B	A	A	B	B	A	B
AX-111008994	7	61.585	B	A	B	B	A	A	A	A	A	B	B	A	B	B	A	A	B	X	X	B	A	X	B	B	A	X	X	B	B	B	X	X	B	B	A	B	B	A	A	A	B	A	A	X	B	A	B
AX-110039456	7	62.456	B	X	A	X	A	A	A	X	B	A	A	A	B	B	B	A	A	B	A	A	A	A	B	B	B	A	X	B	B	A	A	B	A	X	A	B	A	B	A	B	B	A	B	X	B	X	A
AX-110079931	7	63.132	B	X	A	X	A	A	A	X	B	A	A	A	B	B	B	A	A	B	A	A	A	A	B	B	B	A	X	B	B	A	A	B	B	A	A	B	A	B	A	B	B	A	B	X	B	A	B
AX-108833841	7	64.276	B	A	B	B	A	A	A	A	A	B	B	A	A	B	A	B	B	X	A	B	A	A	B	B	A	B	X	B	B	B	X	B	B	B	A	B	B	A	A	A	B	A	A	X	B	A	B
AX-95151919	7	68.423	B	A	A	X	A	A	A	X	B	A	A	A	B	B	B	A	A	B	A	A	A	A	B	B	B	A	X	B	B	X	A	A	A	X	A	A	A	B	A	B	B	B	B	X	B	A	B
AX-108825451	7	70.076	B	A	B	X	A	A	A	A	A	A	A	A	A	B	A	A	B	A	X	B	A	A	B	B	A	X	X	B	B	B	B	B	X	B	A	A	B	A	A	A	B	A	A	X	B	A	B
AX-109892978	7	72.868	A	A	X	X	A	A	A	X	B	A	A	A	X	B	B	A	A	B	A	A	B	A	B	B	A	A	X	B	B	X	B	A	X	X	A	A	A	B	A	B	B	A	B	X	B	A	A
AX-109589492	7	74.845	B	A	B	A	A	A	A	A	A	A	A	A	A	B	A	A	B	B	X	A	A	A	A	A	A	X	X	B	B	B	A	B	B	B	A	A	B	A	A	A	B	A	B	X	B	A	B
AX-111053837	7	75.042	B	A	B	A	A	A	A	A	A	A	A	A	A	B	A	B	B	B	X	A	A	A	A	A	A	B	X	B	B	B	A	B	B	B	A	A	B	A	A	A	B	A	B	X	B	A	B
AX-109392538	7	75.307	B	A	B	A	A	A	A	A	A	A	A	A	A	B	A	B	B	B	X	A	A	A	A	A	A	B	X	B	B	B	A	B	B	B	A	A	B	A	A	A	B	A	A	X	B	A	B
AX-108730499	7	75.47	B	A	B	A	A	A	A	A	A	A	A	A	A	B	A	B	B	B	X	A	A	A	A	A	A	B	X	B	B	B	A	B	B	B	A	A	B	A	A	A	B	A	A	X	B	A	B
AX-89470960	7	75.693	X	A	B	B	A	A	A	A	B	B	A	A	X	B	B	A	A	B	A	A	B	A	B	B	A	A	A	B	B	X	B	A	A	X	A	A	A	B	A	B	A	A	X	X	B	A	B
AX-111544922	7	75.901	B	B	B	A	A	A	A	A	A	A	A	A	A	B	A	B	B	B	A	A	A	A	A	A	A	B	X	B	B	B	A	B	B	B	A	A	B	A	A	A	B	A	B	X	B	A	B
AX-108733656	7	76.499	B	A	B	X	A	A	A	A	A	A	A	A	A	B	A	A	B	B	X	A	A	A	A	A	A	X	X	B	B	B	A	B	B	B	A	A	B	A	A	A	B	A	A	X	B	A	B
AX-110913950	7	77.436	B	A	B	X	A	A	A	A	A	A	A	A	A	B	A	A	B	X	X	A	A	A	B	B	A	X	X	B	B	B	A	B	B	B	A	A	B	A	A	A	X	A	A	X	B	A	B
AX-108758993	7	77.486	X	A	B	B	A	B	A	A	B	X	A	A	X	B	B	X	A	B	A	A	B	A	B	B	A	A	X	B	B	B	B	A	X	X	A	A	A	B	A	B	A	A	X	B	B	A	A
AX-111142801	7	77.954	X	A	B	X	A	B	A	A	B	X	A	A	X	B	B	A	A	B	A	A	B	A	B	B	A	A	X	B	B	B	B	A	A	X	A	A	A	B	A	B	A	A	X	X	B	A	A
AX-109397105	7	79.322	X	A	B	A	A	A	A	X	B	X	A	A	X	B	B	B	A	B	A	A	B	A	X	B	A	X	A	B	B	X	B	B	A	X	A	A	A	B	A	B	A	A	A	X	B	A	A
AX-108967828	7	79.779	X	A	B	A	A	A	A	X	B	B	A	A	X	B	B	B	A	B	A	A	B	A	B	B	A	B	X	B	B	X	B	B	A	X	A	A	A	B	A	B	B	A	X	B	B	A	A
AX-109621355	7	80.285	X	A	B	A	A	A	A	X	B	B	A	A	X	B	B	B	A	B	A	A	B	A	B	B	A	B	X	B	B	X	B	B	A	X	A	A	A	B	A	B	A	A	X	X	B	A	A
AX-111224300	7	80.935	X	A	B	A	A	B	A	A	B	B	A	A	X	B	B	B	A	B	A	A	B	A	B	B	A	X	X	B	B	X	B	B	A	X	A	A	A	B	A	B	A	A	A	X	B	A	A
AX-110962843	7	87.933	X	A	B	X	X	B	B	A	B	A	X	A	A	B	A	B	A	B	A	A	B	B	B	B	B	B	B	B	B	X	B	B	A	X	A	A	A	B	A	B	A	A	A	X	B	A	B
AX-111763200	7	88.311	X	A	B	A	X	B	B	A	B	A	X	A	A	B	A	B	A	B	A	A	B	B	B	B	B	B	B	B	B	X	B	B	A	X	A	A	A	B	A	B	A	A	A	X	B	A	B
AX-108787762	7	88.501	X	X	B	A	X	B	B	A	B	A	X	A	A	B	A	B	A	B	A	A	B	B	B	B	B	B	B	B	B	X	B	B	X	X	A	A	A	B	A	B	A	A	A	B	B	A	B
AX-109274942	7	88.872	X	A	B	A	X	B	B	A	B	A	X	A	A	B	A	B	A	B	A	A	B	B	B	B	B	B	B	B	B	X	B	B	A	X	A	A	A	B	A	B	A	A	A	B	B	A	B
AX-110928333	7	89.933	X	A	B	X	A	B	B	A	B	A	X	A	X	B	A	X	A	B	A	A	B	B	B	B	A	A	B	B	B	X	B	A	X	X	A	A	A	B	A	B	A	A	A	X	B	A	A
AX-111598704	7	90.501	X	A	B	A	X	B	B	A	B	A	X	A	A	B	A	A	A	B	A	A	B	B	B	B	B	A	B	B	B	X	B	A	A	X	A	A	A	B	A	B	A	A	A	X	B	A	B
AX-108814601	7	91.522	X	A	B	A	A	B	B	A	B	A	X	A	X	B	A	A	A	B	A	A	B	B	B	B	B	A	B	B	B	X	B	A	A	X	A	A	A	B	A	B	A	A	A	X	B	A	B
AX-111692849	7	92.126	X	A	B	A	X	B	B	A	B	A	X	A	X	B	A	A	A	B	A	A	B	B	B	B	B	A	B	B	B	B	B	A	A	X	A	A	A	B	A	B	A	A	A	X	B	A	B
AX-109931570	7	92.328	X	A	B	A	X	B	B	A	B	A	X	A	X	B	A	A	A	B	A	A	B	B	B	B	B	A	B	B	B	B	B	A	A	X	A	X	A	X	A	B	A	A	B	B	B	A	B
AX-109343667	7	93.607	X	A	B	A	X	B	B	A	B	A	X	A	B	B	A	A	A	B	A	B	B	B	B	B	A	A	B	B	B	B	B	A	A	X	A	X	A	B	A	B	A	A	B	B	B	A	B
AX-109509229	7	94.128	X	A	B	A	X	B	B	A	B	A	X	A	X	B	A	A	A	B	A	B	B	B	B	B	A	A	B	B	B	B	B	A	A	X	A	A	A	B	A	B	A	A	B	B	B	A	B
AX-109649512	7	94.547	X	A	B	A	X	B	B	A	B	A	X	A	X	B	A	A	A	B	A	B	B	B	B	B	A	A	B	B	B	B	B	A	A	X	A	A	A	B	A	B	A	A	B	X	B	A	B
AX-110508416	7	96.207	X	A	B	X	X	B	B	A	B	A	X	A	X	B	A	A	A	B	A	B	B	B	B	B	A	A	B	B	B	B	A	A	A	A	A	A	A	X	A	X	A	A	B	B	B	A	B
AX-109386683	7	97.629	X	B	B	X	X	B	B	A	B	A	X	A	X	B	A	X	A	A	A	B	B	B	B	B	A	A	B	B	B	B	A	A	A	A	A	X	A	B	A	B	A	A	B	X	B	A	B
AX-109397009	7	99.263	X	B	B	B	X	B	B	A	B	A	B	A	B	B	A	X	A	A	A	B	B	B	B	B	A	A	B	B	B	B	A	A	A	A	A	X	A	B	A	B	A	A	X	X	B	A	A
AX-110922897	7	100.191	X	B	B	X	X	B	B	A	B	A	B	A	X	B	A	B	A	A	A	B	B	B	B	B	A	B	B	B	B	B	A	B	A	A	A	A	A	B	A	B	A	A	X	B	B	A	A
AX-110439700	7	100.78	X	B	B	X	X	B	B	A	B	A	B	A	X	B	A	B	A	X	A	B	B	B	B	B	A	B	B	B	B	B	A	B	A	A	A	A	A	B	A	B	A	A	B	B	B	A	A
AX-111024705	7	101.178	X	X	B	X	X	B	B	A	B	A	B	A	X	B	A	B	A	A	A	B	B	B	B	B	A	B	B	B	B	B	A	B	A	A	A	A	A	B	B	B	A	A	X	B	B	A	B
AX-109275027	7	102.944	A	B	B	X	A	B	A	A	B	A	B	A	X	B	A	B	X	A	A	B	B	B	B	B	A	B	B	B	B	B	A	B	A	A	A	A	A	B	B	B	A	A	X	B	B	A	B
AX-108938759	7	104.156	A	B	B	X	A	B	A	A	B	A	B	A	B	B	A	B	B	X	A	B	B	B	B	B	A	B	B	B	B	B	A	B	A	X	A	A	A	B	A	B	A	A	B	B	B	X	A
AX-111133365	7	105.572	A	B	B	X	A	B	A	A	B	A	B	A	X	A	A	B	X	A	A	B	B	B	B	B	A	B	B	B	B	X	A	B	B	A	A	A	A	B	A	B	A	A	X	B	B	A	A
AX-109536494	7	106.975	A	B	B	B	A	B	A	A	B	A	B	A	X	A	A	A	X	A	A	B	B	B	B	B	A	A	B	B	B	X	A	A	X	A	A	A	A	B	A	B	A	A	X	B	B	A	A
AX-111498188	7	108.336	A	B	B	B	A	B	A	A	B	A	B	A	X	A	A	A	X	A	A	B	B	B	B	B	A	A	B	B	B	X	A	A	B	X	A	A	A	B	B	B	A	A	X	B	B	A	B
AX-110916132	7	110.868	A	B	B	B	A	B	A	A	B	A	B	A	X	A	A	A	B	A	A	B	B	A	B	B	A	X	B	B	B	X	A	A	B	X	A	A	A	B	A	B	B	A	X	B	B	A	A
AX-110016134	7	111.437	A	B	B	X	A	B	A	X	B	A	B	A	X	A	A	A	B	A	A	B	B	A	B	B	A	B	B	B	B	B	A	A	X	X	A	A	A	B	A	B	B	A	B	B	B	X	A
AX-109623789	7	114.087	A	B	B	B	A	B	A	X	B	A	B	A	X	A	A	B	B	A	A	B	B	A	B	B	A	B	B	B	B	B	A	B	B	X	A	A	B	B	X	B	B	A	X	B	B	B	A
AX-109293721	7	119.421	X	B	B	X	A	B	A	X	A	A	B	A	X	A	A	B	B	A	A	B	B	A	B	B	A	B	B	B	B	B	A	B	B	X	A	A	B	B	X	A	B	A	X	X	B	B	A
AX-109457007	8	0	X	B	A	X	A	A	B	A	B	A	X	X	A	B	A	X	X	B	B	A	A	A	B	A	B	X	B	B	B	A	B	A	A	X	A	B	B	B	A	B	B	B	X	B	B	B	B
AX-109919508	8	0.739	B	B	A	X	A	A	B	A	B	A	X	X	A	B	A	A	X	B	B	A	A	A	B	A	B	X	B	B	B	A	B	A	A	X	A	B	B	B	A	B	B	B	X	B	B	B	B
AX-111487728	8	1.684	X	B	A	A	A	A	A	A	B	A	X	X	A	B	A	X	X	B	B	A	A	A	B	A	B	X	B	B	B	A	B	A	A	X	A	B	B	B	X	B	B	B	X	B	B	B	B
AX-111071356	8	2.753	X	B	A	X	A	A	A	A	B	A	A	X	A	X	A	X	B	B	B	A	A	A	B	A	B	X	B	B	B	A	B	A	A	X	A	B	B	B	X	B	B	B	X	B	B	B	B
AX-109542768	8	3.632	X	B	A	A	A	A	A	A	B	A	A	A	A	B	A	X	A	B	B	A	X	A	B	A	B	B	B	B	X	A	B	A	A	A	A	B	B	X	A	B	B	B	X	X	B	B	X
AX-109860923	8	4.083	B	B	A	A	A	A	A	A	B	A	X	X	A	B	A	B	X	B	B	A	A	A	B	A	B	B	B	B	B	A	B	A	A	X	A	B	B	B	X	B	B	B	B	B	B	B	B
AX-110449717	8	5.363	X	B	A	X	A	A	A	A	B	A	X	X	A	B	A	X	X	B	B	A	X	B	B	A	B	X	B	B	B	A	B	A	A	X	A	B	B	B	A	B	B	B	X	X	B	B	B
AX-110489151	8	7.864	X	B	A	A	A	A	A	A	B	A	B	X	A	B	A	X	B	B	B	A	B	B	B	A	B	X	B	B	B	A	B	A	A	X	A	B	B	B	X	B	B	B	B	B	B	B	B
AX-108914541	8	8.293	X	B	A	A	A	A	A	A	B	A	B	B	A	B	A	X	X	B	B	A	B	B	B	A	B	X	A	B	B	A	B	A	A	X	A	B	B	B	X	A	B	B	X	X	B	B	B
AX-109970449	8	10.294	B	B	A	X	A	A	A	A	A	A	B	B	A	B	A	X	X	B	B	A	B	B	B	A	B	X	X	B	B	A	B	A	A	X	A	B	B	X	X	A	X	B	X	X	B	B	B
AX-109933033	8	10.836	X	B	A	X	A	A	A	A	A	A	B	B	A	B	A	X	X	B	B	A	B	B	B	A	B	X	A	B	B	A	B	A	A	A	A	B	B	A	X	A	X	B	X	B	B	B	B
AX-110393614	8	11.709	X	A	A	X	A	A	A	A	A	A	B	B	A	B	A	X	X	B	B	A	B	B	B	A	B	X	X	B	B	A	B	B	A	X	A	B	B	A	X	A	X	B	X	B	B	B	B
AX-109308174	8	13.248	B	A	B	X	A	A	A	A	A	A	B	B	A	B	A	A	X	B	B	A	B	B	B	A	B	X	X	B	B	A	B	B	A	X	A	B	B	B	A	B	X	B	B	B	B	B	B
AX-108805441	8	13.896	B	A	B	X	A	A	A	A	A	A	B	B	A	B	A	X	X	B	B	A	B	B	B	A	B	X	A	B	X	A	B	B	A	X	A	B	B	B	A	B	X	B	X	X	A	B	B
AX-110922074	8	16.466	B	B	B	X	B	A	A	A	A	A	B	X	A	B	A	X	B	B	B	A	B	B	B	A	B	X	X	B	B	A	B	A	A	X	A	B	B	B	X	B	X	B	X	X	A	B	B
AX-110435611	8	17.809	B	B	B	A	B	A	A	A	A	A	B	X	A	B	A	A	B	B	B	A	B	B	B	B	B	A	X	B	B	A	B	A	A	X	A	B	B	B	A	B	X	B	X	B	A	B	B
AX-110399975	8	18.321	B	B	B	X	B	A	A	A	A	A	B	X	A	B	A	X	X	B	B	A	B	B	B	B	B	A	A	B	B	A	B	A	A	X	A	B	B	B	B	B	X	B	A	X	A	B	B
AX-110909933	8	20.435	B	B	B	A	B	A	A	A	A	A	B	X	A	B	A	A	B	B	B	B	B	B	B	B	B	A	B	B	B	A	B	A	B	X	A	B	B	B	A	B	X	B	X	X	A	B	B
AX-110599784	8	21.774	B	B	B	A	B	A	A	A	A	A	B	X	A	B	A	X	X	B	B	B	B	B	B	B	B	X	B	X	B	A	B	A	B	A	A	X	B	B	A	B	X	B	A	X	A	B	B
AX-110582337	8	24.541	X	B	B	A	B	A	A	X	A	A	B	X	A	B	A	X	X	B	B	B	B	B	B	B	B	X	B	X	B	A	B	A	B	A	A	X	B	B	A	B	X	B	A	X	A	A	B
AX-108810782	8	31.645	X	X	A	X	A	A	B	X	A	A	X	B	A	B	A	B	B	B	B	B	B	B	B	B	B	B	B	X	B	A	B	B	B	A	A	A	B	A	A	A	A	B	B	X	A	B	B
AX-108785732	8	32.027	X	B	A	X	A	A	B	X	A	A	B	B	A	B	A	B	X	B	B	B	B	B	B	B	B	B	B	X	B	A	B	B	B	A	A	A	B	A	A	A	A	B	B	X	A	B	B
AX-109989063	8	33.881	X	B	A	B	A	X	B	X	A	A	B	B	A	B	A	B	X	B	B	B	B	B	B	B	B	B	X	B	B	A	B	A	B	A	A	A	B	A	A	A	A	B	B	B	A	B	B
AX-110928522	8	36.411	X	B	A	A	A	A	B	X	A	A	B	B	A	X	A	B	X	B	B	B	B	B	B	B	B	X	B	X	B	A	B	A	B	A	A	A	B	A	A	A	A	B	B	X	A	B	B
AX-110050261	8	37.354	X	B	A	A	A	A	B	A	A	A	B	B	A	X	A	B	X	X	B	B	B	B	B	B	B	X	B	A	B	A	B	A	B	A	A	A	B	A	A	A	A	B	B	X	A	X	B
AX-111151771	8	40.409	X	B	A	A	B	A	B	X	A	A	X	B	A	B	A	A	B	X	B	B	B	B	B	B	B	A	B	X	B	A	B	A	B	A	A	A	B	A	B	A	A	B	B	B	A	B	B
AX-110473132	8	40.578	B	B	A	A	B	A	B	X	A	A	X	B	A	B	A	A	B	X	B	B	B	B	B	B	B	A	B	X	B	A	B	A	B	A	A	A	B	A	B	A	A	B	B	X	A	B	B
AX-109455970	8	42.464	X	B	A	A	A	A	B	X	A	A	X	B	A	B	A	A	B	X	B	B	B	B	B	B	B	A	B	X	B	A	B	A	B	A	A	A	B	A	B	A	A	B	B	X	A	B	B
AX-111509127	8	42.779	X	B	A	A	A	A	B	X	A	A	X	B	A	B	A	A	B	X	B	B	B	B	B	B	B	A	B	X	B	A	B	A	B	A	A	A	B	A	B	A	A	B	B	X	A	B	B
AX-108866480	8	43.246	B	B	A	A	A	A	B	X	A	A	X	B	A	B	A	A	X	X	B	B	B	B	B	B	B	A	A	B	B	A	B	A	B	A	A	A	B	A	A	A	A	B	B	B	A	B	B
AX-110431883	8	44.141	B	B	A	A	X	A	B	X	A	A	X	A	A	B	A	A	X	X	B	B	B	B	B	B	B	X	A	X	B	A	B	A	B	A	A	A	B	A	B	A	A	B	B	X	A	B	B
AX-110913724	8	44.619	X	B	A	A	A	A	B	X	A	A	X	A	A	B	A	A	X	X	B	B	B	B	B	B	B	X	A	X	B	A	B	A	B	A	A	A	B	A	X	A	A	B	B	X	A	B	B
AX-108748525	8	45.06	X	B	A	A	A	A	B	X	A	A	A	A	A	B	A	A	A	X	B	B	B	B	B	B	B	X	A	A	B	A	B	A	B	A	B	A	B	A	B	A	A	B	B	X	A	B	B
AX-110524075	8	45.253	X	B	A	A	A	A	B	X	A	A	A	A	A	B	A	A	X	X	B	B	B	B	B	B	B	X	A	X	B	A	B	A	B	A	B	A	B	A	B	A	A	B	B	X	A	B	B
AX-110186181	8	46.058	X	B	A	A	A	A	B	X	A	A	X	A	A	B	A	A	X	X	B	B	B	B	B	B	B	X	A	X	B	A	B	A	B	A	B	A	B	A	X	A	A	B	B	X	A	B	B
AX-111484771	8	46.818	X	B	A	A	A	A	B	X	A	A	X	A	A	B	A	A	X	X	B	B	B	B	B	B	B	B	A	X	B	A	B	A	B	A	B	A	B	A	B	A	A	B	B	X	A	B	B
AX-111515592	8	47.346	B	B	A	A	X	A	B	X	A	B	A	A	A	B	A	A	A	X	B	B	B	B	B	B	B	B	A	X	B	A	B	A	B	A	B	A	B	A	B	A	A	B	B	X	A	B	B
AX-109426208	8	48.035	B	B	A	A	A	A	B	B	A	B	X	A	A	B	A	A	X	X	B	B	B	B	B	B	B	B	A	A	B	A	B	A	B	A	B	A	B	A	B	A	A	B	B	B	A	B	B
AX-110924608	8	49.384	X	B	A	X	A	A	B	X	A	B	A	A	A	B	A	A	A	X	B	B	A	B	B	B	B	X	A	A	B	A	B	A	B	A	B	A	B	A	B	A	A	B	B	B	A	B	B
AX-108993041	8	49.898	B	B	A	A	A	A	B	X	A	B	X	A	A	B	A	A	X	X	B	B	A	B	B	B	B	B	A	X	B	A	B	A	B	A	B	X	B	A	B	A	A	B	B	X	A	B	B
AX-109374706	8	50.431	B	B	A	X	A	A	B	X	A	B	X	A	X	B	A	A	A	X	B	B	A	B	B	B	B	X	A	X	B	A	B	A	B	A	B	A	B	A	A	A	A	B	B	X	A	B	B
AX-110914539	8	53.822	X	B	A	X	A	A	B	X	A	B	B	A	A	B	A	A	A	X	B	B	A	B	B	B	B	B	A	B	B	A	B	A	B	A	B	A	B	A	A	A	B	B	B	B	A	B	B
AX-110573587	8	54.044	X	B	A	X	A	A	B	X	A	B	B	A	X	B	A	A	A	X	B	B	A	B	B	B	B	B	A	B	B	A	B	A	B	A	B	A	B	A	A	A	B	B	B	X	A	B	B
AX-111170686	8	54.772	B	B	A	X	A	A	B	X	A	B	B	A	X	B	A	A	A	X	B	B	A	B	B	B	B	B	A	B	B	A	B	A	B	A	B	A	B	A	A	A	B	B	B	B	A	B	B
AX-110918414	8	55.644	X	B	A	X	A	A	B	X	A	B	B	A	X	B	A	A	A	X	B	B	A	B	B	B	B	X	A	B	B	A	B	A	B	X	B	B	A	A	A	A	B	B	B	X	A	B	B
AX-108910620	8	56.148	X	B	A	X	A	A	B	X	A	B	B	A	X	B	A	A	A	X	B	B	A	B	B	B	B	X	A	X	B	A	B	A	B	X	B	B	A	A	A	A	B	B	B	X	A	B	B
AX-110419874	8	58.149	B	B	X	X	A	A	A	X	X	B	B	A	X	B	B	A	A	X	B	B	A	B	B	B	B	X	B	B	B	A	B	A	B	X	B	B	A	A	A	X	B	B	B	X	A	B	B
AX-110741718	8	58.338	X	B	A	X	A	A	A	X	A	B	B	A	X	B	B	A	A	X	B	B	A	B	B	B	B	X	B	B	B	A	B	A	B	X	B	B	A	A	A	A	B	B	B	B	A	B	B
AX-109871579	8	59.106	B	B	A	X	A	A	A	X	A	B	B	A	X	B	B	A	A	X	B	B	A	B	B	B	B	B	B	B	B	A	B	A	B	X	B	B	A	A	A	A	B	B	B	B	A	B	B
AX-108848794	8	59.341	X	B	A	X	A	A	A	X	A	B	B	A	X	B	B	A	A	X	B	B	A	B	B	B	B	B	B	B	B	A	B	A	B	X	B	B	A	A	A	A	B	B	B	X	A	B	B
AX-110406955	8	64.012	X	B	A	B	A	A	A	B	A	A	A	A	X	B	B	A	B	X	B	B	B	B	B	B	B	B	B	X	B	A	B	A	B	A	B	A	A	A	X	A	B	B	B	X	A	B	B
AX-108894913	8	64.71	B	B	A	B	X	A	A	X	A	A	A	A	X	B	B	A	B	X	B	B	B	B	B	B	B	B	B	X	B	A	B	A	B	A	B	X	A	A	A	A	B	B	B	B	A	B	B
AX-110603740	8	68.21	X	B	A	B	A	A	A	B	A	A	A	A	X	B	B	A	B	X	B	B	B	B	B	B	B	X	B	X	B	A	B	A	B	X	B	B	A	A	A	A	B	B	B	B	A	B	A
AX-110028274	8	68.395	A	B	A	X	X	A	A	B	A	A	A	A	X	B	B	A	B	X	B	B	B	B	B	B	B	X	B	B	B	A	B	A	B	X	B	B	A	A	A	A	B	B	B	B	A	B	A
AX-108903591	8	70.304	B	B	A	X	A	A	A	B	A	A	A	A	X	B	B	A	B	B	B	B	B	B	B	X	B	X	B	B	A	A	B	X	B	X	B	B	A	A	A	A	B	B	B	B	A	B	A
AX-110481088	8	70.854	A	B	A	X	A	A	A	B	A	A	A	A	X	B	B	A	B	B	B	B	B	B	B	X	B	A	B	X	A	A	B	A	B	X	B	B	A	A	A	A	B	B	B	B	A	B	A
AX-111151634	8	71.36	A	B	A	X	A	A	A	B	A	A	A	A	X	B	B	A	B	B	B	B	B	B	B	X	B	X	B	X	A	A	B	A	B	X	B	B	A	A	A	A	B	B	B	B	A	B	A
AX-110129723	8	72.226	X	B	A	X	A	A	A	B	A	A	A	A	X	B	B	A	B	B	A	B	B	B	B	X	B	X	B	B	A	A	B	A	B	X	B	B	A	A	A	A	B	B	B	B	A	B	A
AX-109979646	8	79.755	A	B	A	X	B	A	A	B	A	A	A	A	X	B	B	A	B	B	A	A	B	B	B	B	B	X	A	B	A	A	B	B	B	A	B	A	A	A	A	A	B	B	B	B	B	B	B
AX-108895818	8	82.732	A	B	A	B	B	A	A	B	A	A	A	A	X	B	B	A	B	B	A	A	B	B	B	B	B	X	A	B	A	A	B	B	B	A	B	A	A	A	A	A	B	B	B	B	B	B	B
AX-108725963	8	83.135	X	B	A	X	B	A	A	B	A	A	A	A	A	B	B	A	B	B	A	A	B	B	X	B	B	A	A	B	A	A	B	B	B	A	B	A	A	A	A	A	B	B	B	B	B	B	B
AX-108898409	8	83.348	A	B	A	B	B	A	A	B	A	A	A	A	A	B	B	A	B	B	A	A	B	B	B	B	B	X	A	B	A	A	B	B	B	A	B	A	A	A	A	A	B	B	B	B	B	A	B
AX-111082190	8	83.848	A	B	A	X	B	A	A	B	A	A	A	A	X	B	B	A	B	B	A	A	B	B	X	B	B	X	A	B	A	A	B	B	B	A	B	A	A	A	A	A	B	B	B	B	B	B	B
AX-110918765	8	84.801	A	B	A	B	B	A	A	B	A	A	A	A	X	B	B	A	B	B	A	A	B	B	B	B	B	A	A	B	A	A	B	B	B	A	B	A	A	A	A	A	B	B	B	B	B	B	A
AX-111515231	8	93.332	X	B	A	X	A	A	A	B	A	A	A	A	X	B	B	A	A	B	A	B	B	B	B	B	B	X	A	X	A	X	B	B	B	A	B	A	A	B	A	B	B	B	B	B	B	A	X
AX-111096238	8	93.695	X	B	A	X	A	A	A	B	A	A	A	A	X	B	B	A	A	B	A	B	B	B	B	B	B	A	A	X	A	X	B	B	B	A	B	A	A	B	A	B	B	B	B	B	B	A	X
AX-109615874	8	100.609	X	A	A	X	A	B	A	B	A	A	A	A	X	B	B	A	A	B	A	B	B	B	B	B	B	B	A	X	A	A	B	B	B	A	B	A	A	B	B	B	B	B	A	B	B	A	X
AX-109438767	8	102.059	X	A	A	B	A	B	A	B	A	A	A	A	X	B	B	B	B	B	A	B	B	B	B	B	B	B	A	X	A	X	B	B	B	A	B	A	A	B	B	B	B	B	X	B	B	A	A
AX-110558618	8	103.782	X	A	A	B	X	B	A	X	X	A	A	A	X	B	B	B	B	B	A	B	B	B	B	B	B	B	A	X	A	X	B	B	B	A	B	A	A	B	B	B	B	B	X	B	B	A	A
AX-111107270	8	106.292	B	A	A	B	B	B	A	X	B	A	A	A	X	B	B	B	B	B	A	B	B	B	A	B	B	B	A	X	A	X	B	B	B	A	B	A	A	B	B	B	B	B	A	B	B	A	B
AX-110197792	8	106.816	B	A	A	B	B	B	A	X	B	A	A	A	A	B	B	B	B	B	A	B	B	B	A	B	B	B	A	X	A	X	B	B	B	A	B	A	A	B	X	B	B	B	A	B	B	A	B
AX-109890650	8	116.525	B	A	A	X	B	A	A	X	B	A	A	A	A	B	B	B	B	A	B	A	X	B	A	A	B	B	X	B	A	X	B	B	X	X	A	A	A	B	A	B	B	B	X	B	B	A	B
AX-109910548	8	119.168	B	A	A	B	B	B	A	X	B	A	A	A	A	B	B	B	B	A	B	A	A	B	A	A	A	B	X	B	A	X	B	B	X	X	A	A	A	B	A	B	B	B	X	X	B	A	B
AX-111496415	8	119.95	B	A	A	B	B	B	A	X	B	A	A	A	A	B	B	B	B	A	B	A	A	B	A	A	A	B	X	B	A	X	B	B	X	A	A	A	A	B	A	B	B	B	X	X	B	A	B
AX-111218273	8	121.748	B	A	A	B	B	B	A	X	B	A	A	A	A	B	B	B	B	A	B	A	A	B	A	A	A	B	X	B	A	X	B	B	B	A	A	A	A	B	A	B	B	B	X	X	B	A	B
AX-110122585	8	122.141	B	A	A	B	B	B	A	X	B	A	A	A	A	B	B	B	B	A	B	A	A	B	A	A	A	B	X	B	A	X	B	B	B	A	A	A	A	B	A	B	B	B	X	B	B	A	B
AX-109546969	8	122.726	B	A	A	B	B	B	A	X	B	A	A	A	A	B	B	B	B	A	B	A	B	B	A	A	A	B	X	B	A	X	B	B	B	A	A	A	A	B	A	B	B	B	X	B	B	A	B
AX-109422875	9	0	B	A	A	B	A	B	B	X	A	B	B	B	X	A	B	A	A	A	A	A	A	A	B	B	B	B	A	X	B	A	B	X	A	A	B	B	A	A	B	A	X	A	B	X	X	A	B
AX-110376389	9	2.911	B	A	A	B	B	B	B	X	A	B	X	B	B	A	B	A	A	A	A	A	A	A	B	B	B	B	A	B	B	A	B	A	A	A	B	B	A	A	B	A	X	A	B	X	X	A	B
AX-110234451	9	3.925	B	A	A	B	B	B	B	X	A	X	X	B	X	A	B	A	A	A	A	A	A	A	B	B	B	B	A	X	B	A	B	A	A	A	B	B	A	A	B	A	B	A	B	X	X	A	B
AX-108977327	9	5.289	B	A	A	B	B	B	B	X	A	B	X	B	X	A	B	A	A	A	A	A	A	A	B	B	B	B	A	X	B	A	B	A	A	A	B	B	A	A	B	A	X	A	B	X	X	A	B
AX-111291115	9	6.268	B	A	A	B	B	B	B	X	A	B	X	B	X	A	B	A	A	A	A	A	A	A	B	B	B	B	A	X	B	A	B	A	A	A	B	B	A	A	B	A	X	A	B	B	X	A	B
AX-109483656	9	8.175	B	A	A	B	B	B	B	X	A	B	X	B	X	A	B	A	A	A	A	A	A	A	B	B	B	B	A	B	B	A	B	A	A	A	B	B	A	A	B	A	X	A	B	B	X	A	B
AX-109114619	9	10.869	B	A	A	B	B	B	B	X	A	B	X	B	B	A	B	A	A	A	A	B	A	A	B	A	B	B	A	X	B	A	B	A	A	A	B	B	A	A	B	A	X	A	B	X	X	B	B
AX-109516184	9	11.027	B	A	A	B	B	B	B	X	A	B	X	B	B	A	B	A	A	A	A	B	A	A	B	A	B	B	A	X	B	A	B	A	A	A	B	B	A	A	B	A	X	A	B	X	X	B	B
AX-108731997	9	11.503	B	A	A	B	B	B	B	X	A	B	X	B	B	A	B	A	A	X	A	B	A	A	B	A	B	B	A	X	B	A	B	A	A	A	B	B	A	A	B	A	X	A	B	X	X	B	B
AX-108811533	9	12.15	B	A	A	B	B	B	B	X	A	B	B	B	B	A	B	A	A	A	A	B	A	A	B	A	B	B	A	X	B	A	B	A	A	A	B	B	A	A	B	A	X	A	B	X	X	B	B
AX-109842327	9	12.685	B	A	A	B	B	B	B	X	A	B	X	B	B	A	B	A	A	A	A	B	A	A	B	A	B	B	A	X	B	A	B	A	A	A	B	B	A	A	B	A	X	A	B	X	X	B	B
AX-109337862	9	13.635	B	A	A	B	B	B	B	X	A	B	X	B	B	A	B	A	A	A	X	B	A	A	B	A	B	B	A	X	B	A	B	A	A	A	B	B	A	A	B	A	X	A	B	B	X	B	B
AX-110449975	9	13.911	B	A	A	B	B	B	B	X	A	B	X	B	B	A	B	A	A	A	X	B	A	A	B	A	B	B	A	X	B	A	B	A	A	A	B	B	A	A	B	A	X	A	B	X	X	B	B
AX-111644531	9	14.706	B	A	A	B	B	B	B	X	A	B	B	B	B	A	B	A	A	X	X	B	A	A	B	A	B	B	A	X	B	A	B	A	A	A	B	B	A	A	B	A	X	A	B	X	X	B	B
AX-109504334	9	15.02	B	A	A	B	B	B	B	X	A	B	X	B	B	A	B	A	A	X	X	B	A	A	B	A	B	B	A	X	B	A	B	A	A	A	B	B	A	A	B	A	X	A	B	B	X	B	B
AX-110769382	9	16.15	B	A	A	B	B	B	B	X	A	B	X	B	B	A	B	A	A	X	A	B	A	A	B	A	B	B	A	X	B	A	B	A	A	A	B	B	A	A	B	A	X	A	B	B	X	A	B
AX-110246370	9	16.667	B	A	A	B	B	B	B	X	A	B	X	B	B	A	B	A	A	X	A	B	A	A	B	A	B	B	A	B	B	A	B	A	A	X	B	B	A	A	B	A	X	A	B	B	X	A	B
AX-89559833	9	16.947	B	A	A	B	B	B	B	X	A	B	X	B	B	A	B	A	A	X	A	A	A	A	B	A	B	B	A	X	B	A	B	A	A	X	B	B	A	A	B	A	X	A	B	B	X	A	B
AX-109143936	9	18.01	B	A	A	B	B	B	B	X	A	B	X	B	B	A	B	A	A	X	A	A	A	A	B	A	B	B	A	X	B	A	B	A	A	X	B	B	A	A	X	A	X	A	B	X	X	A	B
AX-111666894	9	18.357	B	A	A	B	B	B	B	X	A	B	B	B	B	A	B	A	A	X	A	A	A	A	B	A	B	B	A	X	B	A	B	A	A	X	B	B	A	A	B	A	X	A	B	X	X	A	B
AX-110752656	9	19.953	B	A	A	B	B	B	B	X	A	B	X	B	B	A	B	A	A	X	A	A	A	A	B	A	B	B	A	X	B	A	B	A	A	X	B	B	A	A	B	A	X	A	B	B	X	A	B
AX-109831081	9	21.45	B	A	A	B	B	B	B	X	A	B	X	B	B	A	B	A	A	X	A	A	A	B	B	A	B	B	A	X	B	A	B	A	A	A	B	B	A	A	B	A	X	A	B	X	A	A	B
AX-109580758	9	22.289	B	A	A	B	B	B	B	X	A	B	X	B	B	A	B	A	A	X	A	A	A	B	B	A	B	B	A	X	B	A	B	A	A	X	B	B	A	A	B	A	X	A	B	X	A	A	B
AX-111032603	9	23.663	B	A	A	B	B	B	A	X	A	B	X	B	B	A	B	A	A	X	A	A	A	B	B	A	B	B	A	X	B	A	B	A	A	X	B	B	A	A	B	A	X	A	B	B	A	B	B
AX-110284733	9	25.804	B	A	A	B	B	B	A	X	A	B	X	B	B	A	B	A	A	X	A	A	A	X	B	A	B	B	A	X	B	A	B	A	A	X	B	B	A	A	B	A	X	A	B	B	A	B	B
AX-108891293	9	29.016	B	A	A	B	B	B	A	B	A	B	X	B	B	A	B	A	A	X	A	A	A	B	B	A	A	B	A	B	B	A	B	A	A	A	B	B	A	A	B	A	X	A	B	X	A	B	B
AX-109962624	9	30.309	B	A	A	B	B	B	A	B	A	B	X	B	X	A	B	A	A	X	A	A	A	B	B	A	A	B	A	B	B	A	B	A	A	X	B	B	A	A	B	A	X	A	B	A	A	B	B
AX-109333872	9	33.245	B	A	A	B	B	B	B	B	A	B	X	B	A	A	B	A	A	X	B	A	A	B	B	A	A	B	A	B	B	A	B	A	A	X	B	B	A	A	B	A	X	A	B	X	A	B	B
AX-109164596	9	34.721	B	A	A	B	B	B	B	B	A	B	X	B	A	A	B	A	A	X	B	A	A	B	B	A	A	B	A	X	B	A	B	A	A	X	B	B	A	A	A	A	X	A	B	A	A	B	B
AX-111916664	9	42.295	B	A	A	B	B	B	B	B	A	B	X	B	A	A	B	A	A	X	B	A	A	B	B	A	A	B	A	B	B	X	B	A	A	A	B	B	A	A	B	A	X	A	B	A	B	B	B
AX-110282866	9	45.094	X	A	A	X	B	B	B	B	A	B	X	B	A	A	B	A	A	X	B	A	A	B	B	A	A	B	A	B	A	X	B	A	A	X	B	B	A	A	A	A	X	A	B	A	B	B	B
AX-110923174	9	47.513	B	A	A	X	B	B	B	B	A	B	X	B	A	A	B	A	A	X	B	A	A	B	B	A	A	B	A	X	A	X	B	A	A	X	B	B	A	A	B	A	X	A	B	X	B	B	B
AX-111045512	9	48.153	B	A	A	X	B	B	B	B	A	B	X	B	A	A	B	A	A	X	B	A	A	B	B	A	A	B	A	X	A	X	B	A	A	X	B	B	A	A	B	A	X	A	B	X	B	B	B
AX-109884133	9	48.69	B	A	A	B	B	B	B	B	A	B	X	B	A	A	B	A	A	X	B	A	A	B	B	A	A	B	A	X	A	X	B	B	A	X	B	B	A	A	B	A	X	A	B	A	B	B	B
AX-110388794	9	50.403	B	A	A	B	B	B	B	B	A	B	B	B	A	A	B	A	A	X	B	A	A	B	B	A	A	B	A	X	A	X	B	A	A	X	B	B	A	A	B	A	X	A	B	A	B	B	B
AX-111017855	9	54.686	B	A	A	B	B	B	B	B	A	B	B	B	B	A	B	A	A	X	B	A	A	B	B	A	A	B	A	X	A	X	B	A	A	X	B	B	A	A	B	A	X	A	B	A	B	A	B
AX-109319838	9	56.065	B	A	A	X	B	B	B	B	A	B	B	B	B	A	B	A	A	X	B	A	X	B	B	A	A	B	A	X	A	X	B	A	A	X	B	B	A	A	B	A	X	A	B	X	B	A	B
AX-109799345	9	57.843	B	A	A	B	B	B	B	B	A	B	B	B	B	A	B	A	A	X	B	A	B	B	B	A	A	B	A	X	A	X	B	A	A	X	B	B	A	A	B	A	X	A	B	X	B	A	B
AX-109980905	9	58.213	B	A	A	X	B	B	B	B	A	B	B	B	B	A	B	A	A	X	B	A	B	B	B	A	A	B	A	X	A	X	B	A	A	X	B	B	A	A	B	A	X	A	B	X	B	A	B
AX-110495749	9	59.745	B	A	A	B	B	B	B	B	A	B	B	B	B	A	B	A	A	X	B	A	X	B	B	A	A	B	A	X	A	X	B	A	A	X	B	B	A	X	B	A	B	A	B	X	B	A	B
AX-108729781	9	67.664	B	A	A	B	B	B	A	B	A	B	B	A	B	A	B	B	A	A	B	A	B	X	B	A	A	B	A	A	A	X	A	A	A	X	B	B	A	A	X	A	B	A	B	X	B	A	B
AX-109429351	9	72.831	B	A	A	X	B	B	A	B	A	B	B	A	B	A	B	B	A	X	B	A	B	A	B	B	B	B	A	A	A	X	A	A	B	A	B	X	A	A	X	A	B	A	B	X	B	A	B
AX-95659137	9	74.523	X	A	A	X	B	B	A	B	A	B	B	A	B	A	B	B	A	A	B	A	B	A	B	A	B	B	A	A	A	X	X	A	B	A	B	A	A	A	A	A	B	A	B	A	X	A	B
AX-110567511	9	77.212	A	A	A	X	B	B	A	B	A	B	B	A	B	A	B	X	A	X	B	A	B	A	B	B	B	B	A	A	A	X	A	A	B	A	B	A	A	A	A	A	B	A	B	X	B	A	B
AX-110742797	9	80.29	B	A	A	X	B	B	A	B	A	B	B	B	B	A	B	B	A	X	B	A	B	A	B	B	B	B	A	A	A	X	X	B	B	X	B	B	A	B	A	A	B	X	B	X	B	A	B
AX-110021640	9	82.621	X	A	A	X	A	B	A	B	A	B	B	B	B	A	B	X	A	X	B	A	B	A	B	B	B	B	A	A	A	X	X	A	X	B	B	B	A	B	A	A	B	X	B	A	B	B	B
AX-109918023	9	101.009	A	A	X	B	A	B	A	A	A	A	B	B	B	A	B	X	A	X	B	B	A	A	B	B	B	B	A	X	A	X	A	A	A	X	B	B	B	B	A	A	B	B	B	A	B	B	B
AX-111218157	9	102.695	A	A	X	X	A	B	A	A	A	A	B	B	B	A	B	X	A	X	B	B	A	A	B	B	B	B	A	X	A	X	X	A	X	X	B	B	B	B	A	B	X	B	B	X	B	B	B
AX-111801578	9	106.207	X	A	X	X	A	B	A	A	A	A	B	B	B	A	B	X	A	X	B	B	A	B	B	B	B	B	A	X	A	X	A	A	A	X	B	B	B	B	A	B	X	B	B	A	B	B	B
AX-110607173	9	116.554	B	A	X	A	A	B	A	A	A	A	B	B	X	A	B	A	A	A	X	B	A	B	B	B	X	B	A	X	A	B	B	A	X	A	B	B	B	B	A	B	X	B	B	A	B	B	B
AX-111456724	9	125.208	A	A	X	A	A	B	A	A	A	A	B	B	X	A	B	X	A	A	X	B	A	X	B	B	A	B	A	X	X	B	B	X	X	A	B	B	B	B	X	B	X	B	B	B	B	B	B
AX-108915490	9	125.667	A	A	X	A	A	B	A	A	A	A	B	B	X	A	B	X	A	A	X	B	A	B	B	B	A	X	A	B	A	B	B	A	A	X	B	B	B	B	A	B	X	B	B	B	B	B	B
AX-109948496	9	126.323	A	A	X	A	A	B	A	A	A	A	B	B	X	A	B	X	A	A	X	B	A	B	B	B	A	X	A	X	X	B	B	X	A	A	B	B	B	B	A	B	X	B	B	B	B	B	B
AX-110987465	9	128.168	A	A	A	A	A	B	A	A	A	A	B	B	B	A	B	X	A	A	X	B	A	X	B	B	A	X	A	X	X	B	B	X	X	X	B	B	B	B	A	B	A	B	B	B	B	B	B
AX-111648201	9	139.796	A	A	A	A	A	B	A	A	A	A	B	B	X	B	B	B	A	A	X	B	A	X	A	B	A	A	A	X	X	B	B	B	A	X	B	B	B	B	B	B	A	B	B	B	B	B	A
AX-94786898	9	149.189	A	A	B	A	A	B	A	A	A	A	B	B	A	B	A	B	A	A	X	B	A	X	A	B	A	B	A	B	X	B	B	B	A	B	B	B	B	A	A	A	A	B	B	B	B	B	B
AX-111480642	9	152.029	A	A	B	A	A	B	A	A	A	A	B	B	A	B	A	B	A	A	B	X	A	B	A	B	A	B	A	B	B	B	B	B	A	B	B	B	X	A	B	A	A	B	B	B	B	B	B
AX-109502304	9	153.84	A	A	B	A	A	A	A	A	A	A	B	B	A	B	A	B	A	A	B	A	A	B	A	B	A	B	A	B	B	B	B	B	A	B	B	B	B	A	B	A	A	B	B	B	B	B	B
AX-89547630	9	161.34	A	A	B	A	A	A	A	A	A	A	B	A	A	A	A	B	A	A	B	A	A	X	A	B	A	A	A	B	B	B	B	B	B	B	B	B	B	A	B	A	A	B	B	X	B	B	X
AX-110811858	9	170.507	A	A	B	A	A	A	A	A	A	A	B	A	A	A	A	A	A	A	B	A	A	A	A	A	A	A	A	B	B	B	A	B	B	B	B	B	B	A	A	A	A	B	B	B	B	B	A
AX-109332041	9	173.778	A	A	B	A	A	A	A	A	A	A	B	A	X	A	A	A	A	A	B	A	A	X	A	A	A	A	A	B	B	B	A	B	B	B	B	B	B	A	A	A	A	B	B	B	B	B	A
AX-94423269	9	174.875	A	A	B	A	A	A	A	B	A	A	B	A	B	A	A	A	A	A	B	A	A	X	A	A	A	A	A	B	X	B	A	B	B	B	B	B	B	A	A	A	A	B	B	X	B	B	A
AX-108795940	9	180.194	A	A	B	A	A	A	A	B	A	A	B	A	X	A	A	A	B	A	B	A	A	X	B	A	A	A	A	B	X	B	A	B	B	B	B	B	B	A	A	A	A	A	B	B	B	B	X
AX-111115397	9	181.916	A	A	B	A	B	A	A	B	A	B	B	A	A	A	A	A	B	A	B	A	A	A	B	A	A	A	A	B	X	B	A	B	B	B	B	B	B	A	A	A	A	A	B	X	B	B	X
AX-111490104	9	183.412	A	B	B	A	B	A	A	B	A	B	B	A	X	A	A	A	B	A	B	A	A	X	B	A	A	A	A	B	X	B	A	B	B	B	B	B	B	A	A	A	A	A	B	B	B	B	X
AX-108834585	9	185.169	A	B	B	A	B	A	A	B	A	B	B	A	X	A	A	A	B	A	B	A	A	A	B	A	A	A	A	B	X	B	A	B	B	B	B	B	B	A	A	A	A	A	B	B	B	B	X
AX-89662133	9	186.809	A	B	B	X	B	A	A	B	A	B	B	A	X	A	A	A	B	A	B	A	A	X	B	A	A	A	A	B	X	B	A	B	B	B	B	B	B	A	B	A	A	A	B	B	B	B	X
AX-111408918	9	189.159	A	B	B	X	B	A	A	B	A	B	B	A	X	A	A	A	B	A	B	A	A	X	B	A	A	B	A	B	B	B	A	B	B	B	B	B	B	A	B	X	A	A	B	B	B	B	B
AX-111112231	9	189.916	X	B	B	B	B	A	A	B	A	B	B	A	B	A	A	A	B	A	B	A	A	X	B	A	A	A	A	B	B	B	A	B	B	B	B	B	B	X	B	A	A	A	B	B	B	B	B
AX-108771516	10	0	B	B	B	B	A	B	B	X	B	A	B	B	B	A	B	B	X	B	B	B	B	B	A	A	A	B	X	A	X	A	A	B	A	A	B	A	B	A	A	A	B	A	A	X	A	X	B
AX-110015972	10	0.737	B	B	B	B	A	B	B	B	B	A	B	B	X	A	B	B	X	B	X	B	B	B	A	A	A	B	X	X	X	A	A	B	A	A	B	A	B	A	A	A	B	A	A	X	A	X	B
AX-110716536	10	5.365	B	B	B	B	A	B	B	B	B	A	B	B	X	A	B	B	X	B	X	B	B	B	A	A	A	B	X	X	A	A	A	B	A	A	B	B	B	A	A	A	X	A	A	B	B	X	B
AX-111621169	10	9.35	B	B	B	X	A	B	B	B	B	A	B	B	B	A	B	B	X	B	B	B	B	B	A	A	A	B	X	X	X	A	A	B	A	A	B	B	B	X	A	A	B	A	A	B	B	A	A
AX-110434765	10	13.053	B	B	B	X	A	B	A	B	B	A	B	B	X	A	B	B	X	B	X	B	B	B	A	A	A	A	X	A	X	A	A	B	A	A	A	B	B	A	A	A	X	A	A	X	B	A	A
AX-108785329	10	14.473	B	B	B	X	A	B	A	B	B	A	X	B	X	B	B	B	X	B	B	B	B	B	A	A	A	A	X	X	X	A	A	B	A	A	A	B	B	A	A	A	X	A	A	B	B	A	A
AX-109622473	10	17.486	B	B	B	X	A	B	A	B	B	A	B	B	B	B	B	B	X	B	B	B	B	B	X	A	A	A	A	A	X	A	A	B	A	A	A	A	B	A	A	A	X	A	A	B	B	A	A
AX-108945875	10	17.746	B	B	B	X	A	B	A	B	B	A	B	B	B	B	B	B	X	B	B	B	B	B	B	A	A	A	A	X	X	A	A	B	A	A	A	A	B	A	A	A	X	A	A	B	B	A	A
AX-109426161	10	18.388	B	B	B	A	A	B	A	B	B	A	B	B	B	B	B	B	X	B	B	B	B	B	B	B	A	A	X	X	X	A	A	B	A	A	A	A	B	A	A	A	B	A	A	B	B	A	A
AX-110626940	10	21.989	B	B	B	A	A	B	A	X	B	A	B	B	B	B	B	B	X	B	B	B	B	B	B	B	A	A	A	X	X	A	A	B	A	B	A	A	B	A	A	A	X	A	A	B	B	A	A
AX-111621778	10	23.696	B	B	B	A	A	B	A	A	B	A	B	B	B	B	B	B	X	B	B	B	B	B	B	B	A	A	B	X	A	A	A	B	A	B	A	A	B	A	A	A	X	A	A	B	B	A	A
AX-108944004	10	24.451	B	B	B	A	A	B	A	A	B	A	B	B	B	B	B	B	X	B	B	B	B	B	B	B	A	A	A	B	A	A	A	B	A	B	A	A	B	A	A	A	X	A	A	B	B	A	A
AX-110400967	10	25.691	B	B	B	A	A	B	A	A	B	A	B	B	A	B	B	B	X	B	B	B	B	B	B	B	A	A	A	X	A	A	A	B	A	B	A	A	B	A	A	A	X	A	A	B	B	A	A
AX-109417674	10	26.244	X	B	B	A	A	B	A	A	B	A	B	B	A	B	B	B	X	B	B	B	B	B	B	B	A	A	A	X	A	A	A	B	A	B	A	A	B	A	A	A	X	A	A	B	A	A	X
AX-111029555	10	26.746	B	B	B	A	A	B	A	A	B	A	B	B	A	B	B	B	X	B	B	B	B	B	B	B	A	A	A	X	A	A	A	B	A	B	A	A	B	B	A	X	X	A	A	B	A	A	A
AX-109058636	10	27.298	B	B	B	A	A	B	A	A	B	A	B	B	A	B	B	B	X	B	B	B	B	B	B	B	B	A	A	B	A	A	A	B	A	B	A	A	B	B	A	X	X	A	A	B	A	A	X
AX-109316361	10	28.075	X	B	B	A	A	B	A	A	B	A	B	B	A	B	B	B	X	B	B	B	B	B	B	B	B	A	X	X	A	A	A	B	A	B	A	A	B	B	A	X	B	A	A	B	A	A	A
AX-109821994	10	28.59	X	B	B	A	A	B	A	A	B	A	B	B	A	B	B	B	X	B	B	B	B	B	B	B	B	A	A	X	A	A	A	B	A	B	A	A	B	B	A	X	X	A	A	B	X	B	A
AX-111563829	10	45.277	X	A	B	X	A	B	A	A	B	A	X	B	A	A	A	A	B	A	B	B	A	B	B	B	B	B	A	X	X	A	A	B	B	X	A	A	B	B	B	B	A	A	A	X	X	A	B
AX-108750936	10	46.378	B	A	B	X	A	B	A	A	B	A	X	B	A	A	A	A	B	A	B	B	A	B	B	B	B	B	A	X	X	A	A	B	B	B	A	A	B	B	B	B	A	A	A	X	X	B	B
AX-110140778	10	46.796	X	A	B	X	A	B	A	A	B	A	X	B	A	A	A	A	B	A	B	B	A	B	B	B	B	B	A	B	X	A	A	B	B	B	A	A	B	B	B	B	A	A	A	X	X	B	B
AX-108900808	10	46.799	X	A	B	A	A	B	A	A	B	A	X	B	A	A	A	A	B	A	B	B	A	B	B	B	B	A	A	X	X	A	A	B	B	B	A	A	B	B	B	B	A	A	A	X	X	A	X
AX-110043131	10	47.197	X	A	B	A	A	B	A	A	B	A	X	B	A	A	A	A	B	A	B	B	A	B	B	B	B	A	A	X	X	A	A	B	B	B	A	A	B	B	B	B	A	A	A	X	X	B	A
AX-108842463	10	47.909	X	A	B	A	A	B	A	A	B	A	X	B	A	A	A	A	B	A	B	B	A	B	B	B	B	A	A	X	X	A	A	B	B	B	A	A	B	B	B	B	A	A	A	X	A	B	A
AX-109626604	10	48.036	X	A	B	A	A	B	A	A	B	B	A	B	A	A	A	A	B	A	B	B	A	B	X	B	B	A	A	A	A	A	A	B	B	X	A	A	B	B	A	B	A	A	A	A	A	A	A
AX-111624503	10	48.121	X	A	B	X	A	B	A	A	B	B	X	B	A	A	A	A	B	A	B	B	A	B	B	B	B	B	A	X	A	A	A	B	B	B	A	A	B	B	A	B	A	A	A	A	A	A	B
AX-110927878	10	49.895	X	A	B	A	A	X	A	A	B	A	A	B	A	A	A	A	B	A	B	B	A	B	B	B	B	A	A	A	A	A	A	B	B	X	A	A	B	B	A	X	A	A	A	A	A	B	A
AX-108864123	10	50.417	X	A	B	A	A	B	A	A	B	A	X	B	A	X	A	A	B	A	B	B	A	B	B	B	B	A	A	A	X	A	A	B	B	X	A	A	B	B	A	B	A	A	A	X	X	B	A
AX-109391536	10	50.999	B	A	B	A	A	B	A	A	B	A	X	B	A	B	A	A	B	A	B	B	B	B	B	B	B	A	A	X	X	A	A	B	B	B	A	A	B	B	A	B	A	A	A	X	X	B	A
AX-110453044	10	53.517	A	A	B	A	A	B	A	A	B	A	X	B	B	B	A	A	B	A	B	B	B	B	B	B	B	A	A	X	A	A	A	B	B	B	A	A	B	B	B	B	A	A	A	A	A	B	A
AX-110932017	10	54.021	A	A	B	A	A	B	A	A	B	A	A	B	B	B	A	A	B	A	B	B	B	B	B	B	B	A	A	A	A	A	A	B	B	B	A	A	B	B	B	B	A	A	A	A	A	B	X
AX-110389563	10	54.296	X	A	B	A	A	B	A	A	B	A	X	B	B	B	A	A	B	A	B	B	B	B	B	B	B	A	A	X	X	A	A	B	B	B	A	A	B	B	B	B	A	A	A	X	X	B	A
AX-111254715	10	55.602	X	A	B	A	A	B	A	A	B	A	X	B	B	B	A	A	B	A	B	B	B	B	B	B	B	A	A	X	B	A	A	B	B	B	A	A	B	B	B	B	A	A	A	A	X	B	A
AX-110021685	10	55.726	X	A	B	A	A	B	A	A	B	A	X	B	B	B	A	A	B	A	B	B	B	B	B	B	B	A	A	X	B	A	A	B	B	B	A	A	B	B	B	B	A	A	A	A	X	B	A
AX-111011411	10	58.278	A	A	X	A	A	B	A	A	B	B	X	B	X	B	A	A	B	A	B	B	B	B	B	B	B	A	X	A	B	A	A	B	B	B	A	A	B	B	B	B	A	A	A	X	X	B	B
AX-108794783	10	58.544	A	A	A	X	A	B	A	A	B	B	A	B	B	B	A	A	B	A	B	B	B	B	B	B	B	B	A	A	B	A	A	B	B	X	A	A	B	B	B	B	A	A	A	X	A	B	B
AX-109379589	10	59.23	A	A	X	A	A	B	A	A	B	B	A	B	B	B	A	A	B	A	B	B	B	B	B	B	B	A	A	A	B	A	A	B	B	X	B	A	B	B	B	B	A	A	A	X	A	B	B
AX-109335789	10	62.809	X	A	X	X	A	B	B	A	B	B	X	B	B	B	A	A	B	A	B	B	B	B	B	A	B	A	A	A	B	A	A	B	B	B	B	A	B	B	B	B	A	A	A	X	B	B	A
AX-111664836	10	64.302	X	A	X	X	A	B	B	A	B	B	X	B	B	B	A	A	B	A	B	B	B	B	B	A	A	A	A	A	B	A	A	B	B	B	B	A	B	B	B	B	A	A	A	X	B	B	A
AX-111042195	10	65.115	X	A	X	X	A	B	B	X	B	B	X	B	B	B	A	A	B	A	B	B	B	B	B	A	A	A	X	A	B	A	A	B	B	B	B	A	B	B	B	B	B	A	A	X	B	B	A
AX-110486136	10	66.789	X	A	X	X	A	X	B	X	B	B	X	B	B	B	A	X	B	A	B	B	X	B	B	A	A	A	A	A	B	A	A	B	B	B	B	A	B	B	A	B	B	A	A	X	B	B	A
AX-110171894	10	69.078	X	A	X	X	A	X	B	X	B	B	X	B	B	B	A	A	B	A	B	B	X	B	B	A	A	A	X	A	B	A	A	B	B	B	B	A	B	B	B	B	B	A	A	X	B	B	A
AX-110042237	10	69.759	X	A	X	X	A	X	B	X	B	B	X	B	B	B	A	X	B	A	B	B	X	B	B	X	A	A	B	A	B	A	A	B	B	B	B	A	B	B	B	B	B	A	A	X	B	B	A
AX-108794511	10	70.336	B	A	B	X	A	B	B	X	B	B	X	B	B	B	A	X	B	A	B	B	X	B	B	A	A	A	B	A	B	A	A	B	B	X	B	A	B	B	A	B	B	A	A	X	B	B	A
AX-109316763	10	71.315	X	A	B	X	X	B	A	B	B	A	A	A	A	A	A	X	A	X	X	B	A	B	A	B	B	B	B	B	B	X	B	B	B	A	A	X	B	X	B	B	B	A	B	B	A	A	B
AX-109469915	10	71.835	B	A	X	X	A	X	B	X	B	A	X	B	B	B	A	A	B	A	B	B	B	B	B	A	A	A	B	A	B	A	A	B	B	B	B	A	B	B	B	B	B	A	A	A	B	A	A
AX-110946610	10	72.802	X	A	X	X	A	X	B	X	A	A	X	B	B	B	A	A	B	A	B	B	B	B	B	A	A	A	B	A	B	A	A	B	B	X	B	A	B	B	B	B	B	A	A	A	B	A	A
AX-108907490	10	77.456	X	A	A	B	A	X	B	X	A	A	X	B	B	B	A	A	A	A	B	A	A	B	B	A	A	A	A	A	B	A	A	B	B	A	B	A	B	B	B	B	B	A	A	A	A	A	A
AX-110102976	10	78.191	B	A	A	B	A	X	B	X	A	A	X	B	B	B	A	A	A	A	B	A	A	B	B	A	A	B	A	A	B	A	A	B	B	A	B	A	B	B	X	B	B	A	A	A	A	A	A
AX-109854928	10	80.378	A	A	B	B	A	B	X	B	A	A	A	B	B	B	A	A	A	A	B	B	A	B	B	A	A	A	A	A	B	X	X	B	B	A	B	A	B	B	A	B	B	A	A	A	A	B	A
AX-108824468	10	80.692	B	A	X	B	A	B	X	X	A	A	A	B	B	B	A	A	A	A	B	B	A	B	B	A	A	B	A	A	B	X	A	B	B	A	B	A	B	B	A	B	B	A	A	A	A	B	A
AX-110567219	10	81.066	B	A	A	B	A	B	X	A	A	A	X	B	B	B	A	A	A	A	B	B	A	B	X	A	A	A	A	A	B	X	A	B	B	A	B	A	B	B	A	B	B	A	A	A	A	B	A
AX-110107067	10	82.152	X	A	A	B	A	A	X	X	A	A	X	B	B	B	A	X	A	A	B	X	A	B	B	A	A	B	A	A	B	A	X	B	B	A	B	A	B	B	A	B	B	A	A	A	X	B	A
AX-111479307	10	82.926	X	A	A	B	A	A	X	X	A	A	X	B	B	B	A	A	A	A	B	B	A	X	B	A	A	A	A	A	B	X	X	B	B	A	B	A	B	B	A	B	B	A	A	A	A	B	A
AX-111009790	10	85.979	A	A	B	B	A	B	A	B	A	A	A	B	B	B	A	A	A	A	B	B	A	B	X	A	A	A	A	A	B	A	A	A	B	A	B	A	B	B	A	B	B	A	A	A	A	B	A
AX-110081283	10	91.562	A	A	B	B	A	B	A	X	A	A	A	B	B	B	A	X	A	A	B	A	B	B	B	A	A	A	A	X	B	X	A	A	B	A	B	A	B	B	A	B	B	A	A	A	B	B	A
AX-109863601	10	92.348	A	A	B	B	A	B	A	X	A	A	A	B	B	B	A	X	A	A	B	A	B	B	B	A	A	A	A	X	B	X	A	A	B	A	B	A	B	B	A	B	B	A	A	X	B	B	A
AX-111496006	10	93.26	A	A	B	B	A	B	A	X	A	A	A	B	B	B	A	X	A	A	B	A	B	B	B	A	A	A	A	B	B	X	X	A	B	A	B	A	B	B	A	B	B	A	A	X	B	B	A
AX-109905901	10	98.048	A	A	B	B	A	B	A	A	B	A	A	B	B	A	A	B	A	A	B	A	B	B	X	A	A	B	A	A	B	X	A	A	A	B	B	X	B	B	A	B	B	B	A	A	A	B	A
AX-109460468	10	100.782	A	A	B	B	A	B	A	A	B	A	A	B	B	A	A	X	A	A	B	A	B	B	X	A	A	B	A	B	B	X	A	A	X	B	B	X	B	B	A	B	B	B	A	X	A	A	A
AX-110941089	10	104.259	B	A	B	X	A	B	A	A	B	A	A	X	X	A	A	X	A	A	X	A	B	B	X	A	A	B	A	X	X	X	A	B	B	B	B	B	B	B	B	B	B	B	A	A	A	X	A
AX-109307861	10	105.091	B	A	B	X	A	A	A	A	B	A	A	A	X	A	A	B	A	A	A	A	B	B	A	A	A	B	A	B	A	A	A	B	B	B	B	B	B	B	B	B	B	B	A	X	A	X	X
AX-109545247	10	106.517	A	A	B	A	A	B	A	A	B	A	A	A	A	A	A	X	A	A	A	A	B	B	A	A	A	B	A	B	A	A	A	A	B	B	B	B	B	B	A	B	B	B	A	X	A	X	A
AX-109379482	10	107.704	B	A	B	X	A	A	A	A	B	A	A	A	A	A	A	B	A	A	A	A	B	B	A	A	A	B	A	A	X	A	A	A	B	B	B	B	B	B	A	B	B	B	A	A	A	B	A
AX-111475510	10	108.358	B	A	B	A	A	A	A	A	B	A	A	A	A	A	A	B	A	A	A	A	B	B	A	A	A	B	A	A	A	A	A	A	B	B	B	B	B	B	A	B	B	B	A	A	A	B	A
AX-109392949	11	0	B	B	B	X	A	B	A	B	A	A	X	B	A	B	A	A	B	B	X	B	A	B	A	B	A	B	X	A	A	X	B	B	B	X	B	A	A	B	B	B	B	A	A	X	A	B	A
AX-109873109	11	1.322	B	B	B	A	A	B	A	B	A	A	B	B	A	B	A	A	B	B	B	B	A	B	A	B	A	A	X	A	A	B	B	X	B	B	B	A	A	B	B	B	B	A	A	X	A	B	A
AX-108813019	11	2.344	X	B	B	A	A	B	A	B	A	A	X	B	A	B	A	A	B	B	B	B	A	B	A	B	A	A	A	A	A	A	B	A	B	X	B	A	A	B	B	B	B	A	A	A	A	B	A
AX-109342729	11	2.59	X	B	B	X	A	B	A	B	A	A	X	B	A	B	A	A	B	B	B	B	A	B	A	B	A	A	X	A	A	A	B	X	B	X	B	A	A	B	X	B	B	A	A	A	A	B	A
AX-110982928	11	4.158	X	B	B	A	A	B	A	B	A	A	B	B	A	B	A	A	B	B	B	B	A	B	A	B	A	A	A	A	A	A	B	A	B	X	B	A	A	B	X	B	B	A	A	A	A	B	A
AX-109637078	11	4.744	X	B	B	X	A	B	A	B	A	A	X	B	A	B	A	A	B	B	B	B	A	B	A	B	A	A	X	A	A	A	B	X	B	X	B	A	A	B	X	B	B	A	A	X	A	B	A
AX-111515009	11	5.244	A	B	B	A	A	B	A	B	A	A	A	B	B	B	A	A	B	B	B	B	A	B	A	B	A	A	A	A	A	A	B	A	B	X	B	A	A	B	A	B	B	A	A	A	A	B	A
AX-109378426	11	5.445	A	B	B	A	A	B	A	B	A	A	X	B	B	B	A	A	B	B	B	B	A	B	A	B	A	A	X	A	A	A	B	X	B	X	B	A	A	B	B	B	B	A	A	A	A	B	A
AX-111489623	11	5.868	A	B	B	X	A	B	A	B	A	A	X	B	B	B	A	A	B	B	B	B	A	B	A	B	A	A	A	A	A	A	B	A	B	A	B	A	A	B	X	B	B	A	A	A	A	B	A
AX-109273321	11	6.181	X	B	B	X	A	B	A	B	A	A	X	B	B	B	A	A	B	B	B	B	A	B	A	B	A	A	X	A	A	A	B	A	B	X	B	A	A	B	X	B	B	A	A	X	A	B	A
AX-109911996	11	6.666	A	B	B	X	A	B	A	B	A	X	A	B	B	B	A	B	B	B	B	B	A	B	A	B	A	A	X	A	A	A	B	A	B	X	B	A	A	B	X	B	B	A	A	X	A	B	B
AX-109418515	11	7.085	A	B	B	X	A	B	A	B	A	A	X	B	B	B	A	A	B	B	B	B	A	B	A	B	A	A	A	A	A	A	B	A	B	X	B	A	A	B	X	B	B	A	A	A	A	B	A
AX-110452997	11	7.58	A	B	B	X	A	B	A	B	A	X	X	B	B	B	A	B	B	B	B	B	A	B	A	B	A	X	X	A	A	A	B	A	B	X	B	A	A	X	B	B	B	A	A	X	A	B	B
AX-108891115	11	7.987	A	B	B	X	A	B	A	B	A	A	X	B	B	A	A	A	B	B	B	B	A	B	A	B	A	A	X	A	A	A	B	A	B	X	B	A	A	B	X	B	B	A	A	X	A	B	A
AX-109841712	11	8.927	A	B	B	A	A	B	A	B	A	A	X	B	B	A	A	B	B	B	B	B	A	B	A	B	A	A	X	A	A	A	B	A	B	X	B	A	A	B	X	B	B	A	A	X	A	B	B
AX-110385750	11	9.34	X	B	B	X	A	B	A	B	A	A	X	B	B	A	A	B	B	B	B	B	A	B	A	B	A	A	X	A	A	A	B	A	B	X	B	A	A	B	X	B	B	A	A	X	A	B	B
AX-108774131	11	10.441	A	B	B	A	A	B	A	B	A	A	X	B	B	A	A	B	B	B	X	B	A	B	A	B	A	A	X	A	A	A	B	A	B	X	B	A	A	B	X	B	B	A	A	X	A	B	B
AX-108953195	11	11.025	X	B	B	X	A	B	A	B	A	A	X	B	X	A	A	B	B	B	B	B	A	B	A	B	A	A	A	A	A	A	B	A	B	X	B	A	A	B	A	B	B	A	A	B	A	B	B
AX-110128814	11	13.977	A	B	B	A	A	B	A	B	A	A	B	B	X	A	A	B	X	A	B	B	A	B	X	A	A	A	X	A	A	A	B	A	B	X	B	A	A	B	X	B	B	A	A	X	A	B	B
AX-86174787	11	14.444	A	B	B	A	A	B	A	B	A	A	B	B	X	A	A	X	X	A	B	B	A	B	B	A	A	A	X	A	A	A	B	A	B	X	B	A	A	B	X	B	B	A	A	B	A	B	B
AX-109306009	11	15.111	A	B	B	A	A	B	A	B	A	A	B	B	B	A	A	A	X	A	B	B	A	B	B	A	A	A	X	A	A	A	B	A	B	X	B	A	A	B	B	B	B	A	A	X	A	B	A
AX-109457891	11	16.295	A	B	B	X	A	B	A	B	A	A	B	B	B	A	A	A	B	A	B	B	A	B	B	A	A	B	B	A	A	A	B	B	B	X	B	A	A	B	X	B	B	A	A	B	A	B	A
AX-110621521	11	20.11	B	B	B	X	A	B	A	B	A	A	B	B	B	A	A	A	X	A	B	A	A	B	B	A	A	X	X	A	A	A	B	A	X	X	B	A	A	B	A	B	B	A	A	B	A	B	A
AX-109287209	11	21.391	B	B	B	A	A	B	A	B	A	B	B	B	B	A	A	A	X	A	B	A	A	B	B	A	A	B	B	A	A	A	B	B	B	X	A	A	A	B	A	B	B	A	A	B	A	B	A
AX-111569546	11	24.004	X	B	B	A	A	B	A	B	A	B	B	B	X	B	A	X	X	A	B	A	A	B	B	A	A	X	X	A	A	A	B	A	B	X	A	A	A	B	A	B	B	A	A	X	A	B	B
AX-111184438	11	24.493	B	B	B	X	A	B	A	B	A	B	B	B	B	B	A	B	X	A	B	A	A	B	B	A	A	B	B	A	A	A	B	B	X	X	A	A	A	B	A	B	B	A	A	X	A	B	B
AX-110566246	11	24.742	X	B	B	A	A	B	A	B	A	B	B	B	X	B	A	B	X	A	B	A	A	B	B	A	A	X	X	A	A	A	B	A	X	X	A	A	A	B	X	B	B	A	A	B	A	B	B
AX-110963704	11	26.595	X	B	B	A	A	B	A	A	A	B	B	B	B	B	A	B	X	A	B	A	A	B	B	A	A	A	X	A	A	A	B	A	B	X	A	A	A	B	A	B	B	A	A	X	A	B	A
AX-94534705	11	28.059	X	B	B	A	A	B	A	A	A	B	B	B	X	A	A	A	X	A	B	A	A	B	B	A	A	A	B	A	A	X	B	A	B	X	A	A	A	X	A	B	B	A	A	X	A	X	A
AX-109317229	11	29.085	B	B	B	A	A	B	A	A	A	B	B	B	B	A	A	A	X	A	B	A	A	B	X	A	A	X	X	A	A	X	B	B	X	X	A	A	A	B	A	B	B	A	A	X	A	B	A
AX-108756572	11	31.83	B	B	B	A	A	B	A	A	A	B	B	B	X	A	A	A	X	X	A	A	A	B	A	A	A	A	B	A	A	X	B	A	A	X	A	A	A	B	A	B	B	A	A	X	A	B	A
AX-111205823	11	32.36	B	B	B	X	A	X	A	A	A	B	B	B	X	A	A	A	X	X	A	A	A	B	A	A	A	A	B	A	A	X	B	A	A	X	A	A	A	X	A	X	B	A	A	X	A	B	A
AX-110967502	11	32.552	B	B	B	A	A	B	A	A	A	B	B	B	B	A	A	A	X	X	A	A	A	B	A	A	A	A	B	A	A	X	B	A	A	X	A	A	A	X	A	B	B	A	A	X	A	B	A
AX-110620239	11	32.899	B	B	B	A	A	B	A	A	A	B	B	B	B	A	A	A	X	X	A	A	A	B	A	A	A	A	B	A	A	B	B	A	A	X	A	A	A	X	A	B	B	A	A	X	A	B	A
AX-94484839	11	32.907	B	B	B	A	A	B	A	A	A	B	B	B	B	A	A	B	X	X	A	A	A	B	A	A	A	A	B	A	A	X	X	A	A	X	A	A	A	X	A	B	B	A	A	X	A	B	A
AX-111520953	11	32.994	B	B	B	X	A	B	A	A	A	B	B	B	B	A	A	A	X	X	A	A	A	B	X	A	A	A	B	A	A	B	B	A	A	X	A	A	A	B	A	B	B	A	A	X	A	B	A
AX-108901323	11	33.001	X	B	B	A	A	B	A	A	A	B	B	B	B	A	A	B	X	X	A	A	A	B	B	A	A	A	B	A	A	B	B	A	A	X	A	A	A	X	A	B	B	A	A	X	A	B	A
AX-109924201	11	33.736	B	B	B	X	A	B	A	A	A	B	B	B	B	A	A	B	B	X	A	A	A	B	B	A	A	A	B	A	A	X	B	A	A	X	A	A	A	B	X	B	B	A	A	B	A	B	A
AX-89380210	11	34.262	B	B	B	A	A	B	A	A	A	B	B	B	B	A	A	B	B	X	A	A	A	B	A	A	A	A	B	A	A	X	B	A	A	B	A	X	A	B	X	B	B	A	A	B	A	B	A
AX-110918369	11	34.657	B	B	B	X	A	B	A	A	A	B	B	B	B	A	A	B	B	X	A	A	A	B	A	A	A	A	B	A	A	B	B	A	A	X	A	A	A	B	X	B	B	A	A	B	A	B	A
AX-110533856	11	34.995	B	B	B	X	A	B	A	A	A	B	B	B	X	A	A	B	X	X	A	A	A	B	A	A	A	A	B	A	A	X	B	A	A	X	A	A	A	B	X	B	B	A	A	B	A	B	A
AX-109363329	11	35.484	B	B	B	A	A	B	A	A	A	B	B	B	X	A	A	B	B	X	B	A	A	B	A	A	A	A	B	A	A	X	B	A	A	X	A	A	B	X	A	B	B	A	A	X	A	B	A
AX-111493107	11	36.399	B	B	B	X	A	B	A	A	A	B	B	B	X	A	A	B	B	X	B	A	A	B	A	A	A	A	B	A	A	X	B	A	A	X	A	A	B	B	A	B	B	A	A	X	A	B	A
AX-110423735	11	36.727	B	B	B	X	A	B	A	A	A	B	B	B	X	A	A	B	B	X	B	A	A	B	A	A	A	A	B	A	A	B	B	A	A	X	A	A	B	A	X	B	B	A	A	X	A	B	A
AX-109971274	11	36.982	B	B	B	A	A	B	A	A	A	B	X	B	B	A	A	B	X	X	A	A	A	B	A	A	A	A	B	A	A	X	B	B	A	X	A	A	A	B	A	B	B	A	A	X	A	B	A
AX-108784373	11	37.55	B	B	B	X	A	B	A	A	A	B	B	B	B	A	A	B	B	B	A	A	A	B	A	A	A	A	B	A	A	B	B	B	A	X	A	A	B	B	A	B	B	A	A	B	A	B	A
AX-108780079	11	37.695	B	B	B	X	A	B	A	A	A	B	B	B	B	A	A	B	B	X	A	A	A	B	A	A	A	A	B	A	A	B	B	B	A	X	A	A	B	B	X	B	B	A	A	B	A	B	A
AX-111041469	11	38.155	B	B	B	X	A	B	A	A	A	B	B	B	B	A	A	B	B	X	B	A	A	B	A	A	A	A	B	A	A	B	B	B	A	X	A	A	B	A	A	B	B	A	A	B	A	B	A
AX-110987593	11	38.549	X	B	B	A	A	B	A	A	A	B	B	B	X	A	A	X	B	A	B	A	A	B	A	A	A	A	B	A	A	X	B	B	A	X	A	A	B	A	A	B	B	A	A	A	A	B	A
AX-108855370	11	41.316	B	B	B	X	A	B	A	A	A	B	B	B	X	A	A	B	B	X	B	A	A	B	A	A	A	B	B	X	A	B	B	A	A	X	B	A	B	X	A	A	B	A	A	B	A	B	A
AX-94577088	11	42.94	B	B	B	A	A	B	A	A	A	B	B	B	X	A	A	A	X	X	B	A	A	B	A	A	A	B	B	X	A	B	B	A	A	X	B	A	B	A	A	A	B	A	A	X	A	B	A
AX-109483753	11	43.442	B	B	B	A	A	B	A	A	A	B	B	B	X	A	A	A	X	A	B	A	A	B	A	A	A	B	B	A	A	X	B	A	A	X	B	A	B	A	A	A	B	A	A	X	A	X	A
AX-109362203	11	43.799	B	B	B	A	A	B	A	A	A	B	B	B	X	A	A	A	X	X	B	A	A	B	A	A	A	B	B	A	A	X	B	A	A	X	B	A	B	X	A	A	B	A	A	X	A	B	A
AX-108982575	11	45.107	B	B	B	A	A	B	A	A	A	B	B	B	X	A	A	B	X	X	B	B	A	B	A	A	A	B	B	A	A	B	B	A	A	X	B	A	B	A	A	A	B	A	A	B	A	B	A
AX-111022978	11	50.017	X	B	B	A	A	B	A	A	A	X	B	B	A	X	B	X	A	A	A	B	A	B	X	A	B	B	B	A	A	X	B	A	A	A	B	A	B	A	A	A	B	A	A	A	A	B	A
AX-108935259	11	50.326	X	B	B	A	X	B	A	A	A	X	B	B	X	B	B	A	X	X	A	B	A	B	B	A	B	B	B	A	A	X	B	A	A	A	B	A	B	X	A	A	B	A	A	A	A	B	A
AX-109479006	11	51.319	B	B	B	A	X	B	A	A	A	B	B	B	X	B	B	B	X	X	A	B	A	B	B	A	B	B	B	A	A	X	B	A	A	A	B	A	B	X	A	A	B	A	A	A	A	B	A
AX-111477217	11	51.647	X	B	B	A	X	B	A	A	A	B	B	B	X	B	B	B	X	X	A	B	A	B	B	A	B	B	B	A	A	B	B	A	A	A	B	A	B	X	A	A	B	A	A	X	A	B	A
AX-109446574	11	52.05	X	B	B	A	X	B	A	A	A	X	B	B	A	X	B	B	X	X	A	B	A	B	X	A	B	B	B	A	A	B	B	A	A	A	B	X	B	X	A	A	B	A	A	A	A	B	A
AX-109032596	11	53.091	X	B	B	X	X	B	A	A	A	X	B	B	A	B	B	B	X	X	A	B	A	B	B	A	B	B	B	A	A	B	B	A	A	A	B	A	B	X	A	A	B	A	A	A	A	B	A
AX-94486277	11	57.919	X	B	B	A	X	B	B	A	A	X	B	B	A	B	B	A	X	X	A	B	B	B	B	A	B	B	B	A	B	B	B	A	A	A	B	A	A	A	A	A	A	A	A	A	A	B	A
AX-111595278	11	58.536	X	B	B	A	X	B	B	A	A	X	B	B	A	B	B	A	X	X	A	B	B	B	B	A	B	B	B	A	A	B	B	A	A	A	B	A	A	A	A	A	A	A	A	A	A	B	B
AX-110378783	12	0	A	B	A	A	B	A	B	X	A	B	A	B	A	A	A	A	A	B	X	B	A	A	B	A	B	X	B	A	B	A	B	A	A	X	A	B	B	A	A	A	A	A	A	B	A	B	A
AX-111567155	12	7.688	A	B	B	X	B	A	B	A	A	B	A	B	X	A	A	A	A	B	B	B	A	A	B	A	B	X	B	A	A	A	B	A	A	B	A	B	A	A	A	A	A	A	B	B	A	B	B
AX-111907895	12	8.93	X	B	B	A	B	A	B	A	A	B	A	B	X	A	A	A	A	B	B	B	A	A	B	A	B	X	B	A	X	A	B	A	A	B	A	B	A	A	B	A	A	A	B	B	A	B	B
AX-108763556	12	10.276	A	B	B	A	B	A	B	A	A	B	A	B	B	A	A	X	A	B	B	B	A	A	B	A	X	B	X	A	X	A	B	A	A	B	A	B	A	A	A	A	A	A	B	X	A	B	B
AX-111475478	12	23.061	A	A	B	A	B	B	B	A	X	X	A	B	B	B	A	X	A	X	B	B	A	A	X	A	A	A	B	A	X	B	B	A	A	B	B	X	A	A	B	A	A	X	X	A	A	B	A
AX-111616151	12	26.65	X	A	B	A	B	B	B	A	X	B	A	B	B	B	A	X	A	X	B	B	A	A	B	A	A	A	B	A	X	B	B	A	A	B	B	B	A	A	B	A	A	X	X	X	A	B	X
AX-111767154	12	30.417	B	A	B	X	B	B	B	A	A	A	A	B	B	B	A	A	A	X	B	B	A	A	B	A	A	B	X	A	X	B	B	A	A	B	B	B	A	A	B	A	A	X	X	X	A	B	B
AX-89398511	12	30.887	B	A	B	X	B	B	B	A	X	A	A	B	B	B	A	A	A	X	B	B	A	A	B	A	A	B	X	A	B	B	B	A	A	B	B	B	A	A	B	A	A	X	X	A	A	B	B
AX-111027348	12	31.985	B	A	B	X	B	B	B	A	X	A	A	B	B	B	A	A	A	X	B	B	A	A	B	A	A	X	X	A	A	B	B	A	A	B	B	B	A	A	B	A	A	X	B	X	A	B	X
AX-111071805	12	36.753	A	A	X	X	B	B	B	A	B	A	A	B	B	B	A	A	A	A	B	B	A	A	B	A	A	B	X	A	A	B	B	A	A	B	B	B	A	A	A	A	A	X	B	X	A	B	X
AX-109747439	12	43.027	A	A	B	X	B	B	B	A	B	A	A	B	X	B	B	A	A	A	B	B	A	X	B	A	A	B	X	B	A	B	B	A	A	X	X	B	A	A	A	A	A	X	B	X	A	A	B
AX-110696146	12	44.026	A	A	X	X	B	B	B	A	B	A	A	B	X	B	B	X	A	A	B	B	A	X	B	B	A	B	X	B	A	B	B	B	A	B	B	B	A	A	B	A	A	X	B	X	A	A	B
AX-109180870	12	46.159	A	A	A	X	B	B	B	X	B	A	A	B	A	B	B	X	A	A	B	B	A	A	A	B	A	A	X	B	A	B	A	B	A	B	B	B	A	A	B	A	A	A	B	B	A	A	B
AX-109840136	12	46.845	A	A	X	X	B	B	B	A	B	A	A	B	X	B	B	A	A	A	B	B	A	X	B	B	A	B	X	B	A	B	B	A	A	B	X	B	A	A	A	A	A	A	B	X	A	A	B
AX-109732646	12	47.385	A	A	A	X	B	B	B	X	B	A	X	B	X	B	B	X	A	A	B	B	A	X	A	B	A	A	X	B	A	B	A	B	A	B	B	B	A	A	B	A	A	A	B	B	A	A	B
AX-89692818	12	48.525	A	A	X	X	B	B	B	X	B	A	A	B	A	B	B	A	A	A	B	B	A	X	B	B	A	A	X	B	A	B	B	A	A	B	B	B	A	A	A	A	A	X	B	B	A	A	B
AX-111072884	12	48.654	A	A	X	X	B	B	B	X	B	A	A	B	A	B	B	A	A	A	B	B	A	X	B	B	A	A	X	B	A	B	B	A	A	B	B	B	A	A	A	A	A	A	B	X	A	A	B
AX-109415110	12	48.958	A	A	X	X	B	B	B	A	B	A	A	B	A	B	B	A	A	A	B	B	A	X	B	B	A	A	X	B	A	B	B	A	A	B	X	B	A	A	A	A	A	X	B	B	A	A	B
AX-108793102	12	49.127	A	A	X	X	B	B	B	X	B	A	A	B	A	B	B	A	A	A	B	B	A	X	B	B	A	A	X	B	A	B	B	A	A	B	B	B	A	A	A	A	A	A	B	B	A	A	B
AX-110919144	12	49.55	A	A	X	X	B	B	B	X	B	A	A	B	A	B	B	A	A	A	B	B	A	X	B	B	A	A	X	B	A	B	A	A	A	B	B	B	A	A	A	A	A	X	B	B	A	A	B
AX-109297407	12	49.931	A	A	A	X	B	B	B	X	B	A	A	B	A	B	B	A	A	A	B	B	A	A	A	B	A	A	X	B	A	B	A	A	A	B	B	B	A	A	A	A	A	A	B	X	A	A	B
AX-110538030	12	49.964	A	A	X	X	B	B	B	A	B	A	A	B	A	B	A	A	A	A	B	B	A	X	X	B	A	A	X	B	A	B	B	A	A	B	X	B	A	A	A	A	A	X	B	B	A	A	B
AX-110975379	12	50.131	A	A	X	X	B	B	B	A	B	A	A	B	X	B	A	A	A	A	B	B	A	X	B	B	A	A	X	B	A	B	B	A	A	B	X	B	A	A	A	A	A	X	B	X	A	A	B
AX-109535753	12	50.339	A	A	X	X	B	B	B	A	B	A	A	B	X	B	A	A	A	A	B	B	A	X	B	B	A	B	X	B	A	B	B	A	A	B	X	B	A	A	A	A	A	X	B	X	A	A	B
AX-110621414	12	50.697	A	A	X	X	B	B	B	A	B	A	A	B	X	B	A	A	A	A	B	B	A	A	B	B	A	A	X	B	A	B	B	A	A	B	X	B	A	A	A	A	A	X	B	X	A	A	B
AX-109725873	12	53.343	A	A	A	X	B	B	B	X	B	A	X	B	A	A	B	A	A	A	B	B	A	A	A	B	A	A	A	B	B	B	A	A	A	B	B	B	A	A	A	A	A	X	B	B	A	A	B
AX-89743887	12	53.533	A	A	A	X	B	B	B	X	B	A	X	B	A	A	B	A	A	A	B	B	A	A	A	B	A	A	A	B	B	B	A	A	A	B	B	B	A	A	A	A	A	A	B	B	A	A	B
AX-111731847	12	55.509	A	A	X	X	B	B	B	B	B	A	X	B	X	A	B	A	A	A	B	B	A	X	A	B	A	A	A	B	B	A	A	A	A	B	B	B	A	A	A	A	A	X	A	B	A	A	B
AX-110934311	12	55.792	A	A	X	X	B	B	B	B	B	A	X	B	X	A	B	A	A	A	B	A	A	X	A	B	A	A	A	B	B	A	A	A	A	B	B	B	A	A	A	A	A	A	A	X	A	A	B
AX-109887289	12	56.878	A	A	A	X	B	B	B	X	B	A	X	B	B	A	B	A	A	A	B	A	A	A	A	B	A	A	A	B	B	A	A	A	A	B	B	X	A	A	A	A	A	A	A	X	A	A	B
AX-108781235	12	61.68	A	A	B	A	B	B	B	X	B	A	X	B	B	A	B	A	A	A	A	A	B	X	A	B	A	A	A	B	B	B	A	A	A	B	B	B	A	A	A	A	X	X	A	X	A	A	B
AX-111444133	12	64.905	A	A	B	A	B	B	B	X	B	A	X	A	B	A	B	X	A	A	A	A	B	X	A	B	A	A	A	B	B	B	A	B	A	B	B	B	A	A	B	A	X	A	A	X	A	A	B
AX-111601811	12	66.694	A	A	B	A	B	B	B	X	A	A	X	A	B	A	B	X	A	A	A	A	B	X	A	B	A	B	A	B	B	B	A	B	A	B	B	B	A	A	B	A	X	A	A	B	A	A	B
AX-108801189	12	68.661	B	A	X	A	B	B	B	X	A	A	X	B	B	A	B	A	A	A	A	A	B	X	A	B	A	B	A	B	B	B	A	B	A	B	B	X	A	A	B	A	X	A	A	B	A	A	X
AX-110479720	12	69.427	B	A	B	A	B	B	B	X	A	A	X	A	B	A	B	X	A	A	A	A	B	B	A	B	A	B	A	B	B	B	A	B	A	B	B	B	A	A	B	A	X	A	A	X	A	A	X
AX-89617545	12	69.957	B	A	B	A	B	B	B	X	A	A	X	X	B	A	B	X	A	A	A	A	B	B	A	B	A	B	A	B	B	B	A	B	A	X	B	B	A	A	B	A	X	A	A	B	A	B	B
AX-110464523	12	71.576	B	A	B	A	B	B	B	X	A	A	X	A	B	A	B	A	A	A	A	A	B	B	A	B	A	B	A	B	B	B	A	A	A	B	B	B	A	X	A	A	X	A	A	X	A	A	X
AX-108841615	12	72.654	B	A	B	A	B	B	B	X	A	A	X	A	B	A	B	A	A	A	A	A	B	B	A	B	A	B	A	B	B	B	A	A	A	X	B	B	A	A	A	A	X	X	A	X	A	B	X
AX-110427792	12	74.176	B	A	B	A	B	B	B	X	A	A	X	A	B	A	B	A	A	A	A	A	B	B	A	A	A	B	A	B	B	B	A	A	A	X	B	B	A	A	A	A	X	X	A	X	A	B	X
AX-89453387	12	75.692	B	A	B	A	B	B	B	X	A	A	B	X	B	A	B	A	A	X	A	A	B	B	B	A	A	B	A	B	B	B	A	A	A	X	A	B	A	A	A	A	X	X	A	X	A	B	X
AX-111567243	12	78.523	B	A	B	A	B	B	B	X	A	A	X	A	B	A	B	A	A	A	A	A	B	B	B	A	A	B	A	B	B	B	A	A	A	X	A	A	A	A	A	A	X	X	X	X	A	B	X
AX-89322829	12	83.184	A	A	X	A	A	B	B	B	A	A	A	A	B	A	B	X	A	A	A	X	B	B	B	A	A	A	A	B	B	B	A	B	A	X	A	A	A	A	A	B	X	A	X	X	A	B	B
AX-111049977	12	87.399	A	A	X	A	A	B	B	B	A	A	A	A	B	A	B	B	A	X	A	X	B	B	B	A	A	B	A	B	B	B	B	B	A	X	A	B	A	X	A	B	X	A	X	X	A	A	B
AX-109734965	12	88.717	A	A	X	A	A	B	B	B	A	A	A	A	B	A	B	B	A	X	A	X	B	B	B	A	A	B	A	B	B	B	B	B	A	X	A	B	A	A	A	B	X	A	B	B	A	A	B
AX-109989520	12	89.403	A	A	X	A	A	B	B	B	A	A	A	A	B	A	B	B	A	X	A	A	B	B	B	A	A	B	A	B	B	B	B	B	A	X	A	B	B	A	A	B	B	A	B	B	A	A	X
AX-89567801	12	91.978	A	A	X	X	A	B	B	B	A	A	A	A	B	A	B	B	A	X	A	B	B	B	B	A	A	B	A	B	A	X	B	B	A	X	A	B	B	A	A	B	B	A	B	X	A	A	B
AX-109905441	12	96.988	X	X	X	X	B	B	B	B	A	A	A	B	B	A	B	B	A	X	A	B	B	B	B	B	A	B	A	B	A	X	B	B	A	X	X	B	B	A	A	B	B	A	B	B	A	A	B
AX-111485066	12	103.388	A	B	X	B	B	A	B	B	B	A	A	B	B	A	B	B	A	X	A	B	B	B	B	B	A	B	A	X	A	X	X	B	A	B	B	B	B	B	A	B	X	A	B	B	A	X	B
AX-109626317	12	105.458	A	B	A	B	B	A	A	B	B	A	A	B	B	A	B	B	A	X	A	B	B	B	B	B	A	B	A	X	A	A	B	B	A	B	B	B	B	B	A	B	A	A	B	B	A	X	B
AX-89737494	12	106.257	X	B	A	B	B	A	A	B	B	A	A	B	B	A	B	B	A	X	A	A	B	B	B	B	A	B	A	X	X	X	B	B	A	B	B	B	B	B	A	B	A	A	B	B	A	B	A
AX-89487309	12	107.264	X	B	A	B	B	A	X	X	B	A	A	B	B	A	B	X	A	X	A	A	B	B	B	B	A	B	A	X	X	X	B	A	A	B	B	B	B	B	A	B	A	A	B	X	A	B	A
AX-111480164	12	110.752	A	B	A	X	B	A	X	B	B	A	A	B	B	A	B	B	A	X	A	A	A	B	B	B	A	B	A	A	B	X	B	B	A	B	B	B	B	B	A	B	A	A	B	B	A	B	A
AX-109303311	12	111.273	A	B	A	X	B	A	X	B	B	A	A	B	B	A	B	B	A	X	A	A	X	B	B	B	A	B	A	X	B	X	B	B	A	B	B	B	B	B	B	B	A	A	B	B	A	B	B
AX-89682227	12	113.565	A	B	A	X	B	A	X	B	B	A	A	B	B	A	B	X	A	X	B	B	X	B	B	B	A	B	A	A	B	X	B	B	A	B	B	B	B	B	B	B	A	A	B	X	A	B	B
AX-111463890	12	113.927	A	B	A	X	B	A	X	B	B	A	A	B	B	A	B	X	A	X	B	B	A	B	B	B	A	B	A	A	X	X	B	B	A	B	B	B	B	B	B	B	A	A	B	B	A	B	B
AX-89425809	12	114.211	A	B	A	X	B	A	A	B	B	A	A	B	B	A	B	X	A	X	B	B	A	B	B	B	A	B	A	A	X	X	B	B	A	B	B	B	B	B	B	B	A	A	B	B	A	B	B
AX-89635542	12	114.687	A	B	A	X	B	A	X	B	B	A	A	B	B	A	B	X	A	X	B	B	X	B	B	B	B	B	A	A	X	X	B	B	A	B	B	B	B	B	B	B	A	A	B	B	A	B	B
AX-110505404	12	119.398	B	B	A	A	B	A	X	B	B	A	B	B	B	A	B	X	A	X	B	A	X	A	B	A	B	B	A	A	B	X	B	B	A	X	B	B	B	B	A	B	A	A	B	B	A	B	A
AX-109833230	12	120.159	B	B	A	X	B	A	X	B	B	A	B	B	B	A	B	B	A	X	B	A	X	A	B	A	B	B	X	A	B	X	B	B	A	X	B	B	B	B	B	B	A	A	B	X	A	B	B
AX-111802919	12	121.84	A	B	A	A	B	A	X	B	B	A	B	B	B	A	B	X	A	X	B	A	X	A	A	A	B	B	X	A	B	X	B	B	A	X	B	B	B	B	A	B	A	A	B	B	A	B	A
AX-110479846	12	123.425	A	B	A	A	B	A	X	B	B	A	B	B	B	A	B	X	A	B	B	A	X	A	A	A	B	B	X	A	X	X	B	B	A	X	B	B	B	B	A	B	A	A	B	X	A	B	A
AX-111721070	12	125.077	A	B	A	A	B	A	X	X	B	A	B	B	B	A	B	X	A	X	B	A	X	A	A	A	B	B	X	A	B	X	B	B	A	X	B	B	B	B	A	B	A	A	B	X	A	B	A
AX-111241478	12	125.677	A	B	A	A	B	A	X	X	B	A	B	B	B	A	B	X	A	X	B	A	X	A	A	A	B	B	X	A	B	X	B	B	A	X	B	B	B	B	B	B	A	A	B	X	A	B	B
AX-109304999	13	0	A	B	X	B	A	A	A	A	A	B	B	B	A	B	A	B	A	X	A	B	B	A	B	B	A	B	A	B	A	B	A	A	B	B	A	A	A	B	X	B	B	B	B	X	B	B	B
AX-110587222	13	0.761	A	B	X	B	A	A	A	A	A	B	B	B	A	B	A	B	A	X	A	B	B	A	B	B	A	B	A	X	A	B	A	A	B	X	A	A	A	B	A	B	B	X	B	X	X	B	B
AX-110436209	13	4.127	A	B	X	X	A	A	A	A	A	B	B	B	A	B	A	B	A	B	A	B	B	A	B	B	A	B	A	A	A	A	A	A	B	X	A	A	A	B	A	B	B	X	B	A	A	B	X
AX-110644627	13	10.913	B	B	X	X	A	A	A	A	A	B	B	B	A	B	A	B	B	B	A	B	B	A	B	B	A	B	X	X	A	A	A	X	B	X	A	A	A	B	A	B	B	X	B	X	A	A	X
AX-108861943	13	12.136	B	B	X	X	A	A	A	A	A	B	B	B	A	B	A	X	B	B	A	B	B	A	B	B	A	B	X	A	A	A	A	A	B	B	A	A	A	B	A	B	B	A	B	A	A	A	A
AX-109471991	13	15.618	B	B	X	A	A	A	A	A	B	B	B	B	A	B	X	B	B	B	A	A	B	A	B	B	A	B	X	X	B	A	A	B	B	B	A	A	A	B	A	X	X	A	A	A	A	B	B
AX-110529161	13	16.354	B	B	X	A	A	A	A	A	B	B	B	B	A	B	X	B	B	B	A	A	B	A	B	B	A	B	X	X	B	A	A	B	B	B	A	A	A	B	A	X	X	A	A	X	A	X	B
AX-109401864	13	16.925	B	B	X	A	A	A	A	A	B	B	B	B	A	B	X	B	B	B	A	A	B	A	B	B	A	B	X	X	B	A	A	B	B	B	A	A	A	B	A	X	X	A	A	A	A	X	B
AX-110038175	13	17.507	B	B	X	A	A	A	A	A	B	B	B	B	A	B	A	B	B	B	A	B	B	A	B	B	A	B	X	X	B	A	A	B	B	B	A	A	A	B	A	X	X	X	A	A	A	B	X
AX-111533410	13	18.209	B	B	X	A	A	A	A	A	B	B	B	B	A	B	A	B	B	B	A	B	B	A	B	B	A	B	X	X	B	A	A	A	B	B	A	A	A	B	A	X	X	A	A	A	A	X	X
AX-109859109	13	18.49	X	B	X	X	A	A	A	A	A	B	B	B	A	B	A	X	B	B	A	B	B	A	B	B	A	B	X	A	B	A	A	X	B	B	A	A	A	B	A	A	B	A	A	A	A	X	A
AX-109292423	13	19.421	B	B	X	A	A	A	A	A	A	B	B	B	A	B	A	A	B	B	A	B	B	A	B	B	A	X	X	B	B	A	A	A	B	B	A	A	A	B	A	X	X	A	A	A	A	X	A
AX-111450377	13	20.729	B	B	X	A	A	A	A	A	B	B	B	B	A	B	X	B	B	B	A	A	B	A	B	B	A	B	X	X	B	A	A	A	B	B	A	A	A	B	A	X	X	X	A	A	A	X	A
AX-111038337	13	21.134	B	B	X	A	A	A	A	A	B	B	B	B	A	B	X	B	B	B	A	A	B	A	B	B	A	B	X	X	B	A	A	A	B	B	A	X	A	B	A	A	X	A	A	A	A	B	A
AX-111616054	13	27.693	A	B	A	A	A	A	A	A	B	B	B	B	A	B	B	B	X	B	A	A	B	A	B	B	A	B	X	B	B	A	X	B	B	B	B	A	A	A	A	A	A	A	A	X	A	A	B
AX-109465909	13	28.992	X	B	A	A	A	A	A	A	B	B	B	B	A	B	B	B	X	B	A	A	B	A	X	B	A	B	X	B	B	A	X	B	B	B	B	A	A	A	A	A	A	A	A	X	A	A	B
AX-110959791	13	31.181	X	B	A	A	A	A	A	A	B	B	B	B	A	B	B	B	X	B	A	A	B	A	B	B	A	B	X	X	B	A	X	A	B	B	B	A	A	A	A	A	A	A	A	B	A	A	A
AX-111519092	13	50.09	X	B	X	A	A	A	A	B	B	A	B	B	A	B	B	B	A	B	A	A	A	A	B	B	A	B	B	A	B	A	X	A	A	B	B	B	A	X	A	X	B	A	A	X	B	B	A
AX-108742869	13	51.069	X	B	X	A	X	A	A	B	B	A	B	B	A	B	B	B	X	B	A	A	A	A	B	B	A	B	B	X	B	A	B	A	A	B	B	B	A	B	A	X	B	A	A	B	B	A	A
AX-110980253	13	51.562	X	B	X	X	A	A	A	B	B	A	B	B	X	B	B	A	X	B	A	A	A	A	B	B	A	B	B	B	B	A	X	A	A	B	A	X	A	X	A	A	B	A	A	X	B	A	A
AX-111623810	13	51.948	X	B	X	X	A	A	A	B	B	A	B	B	X	B	B	X	X	B	A	A	A	A	B	B	A	B	B	B	B	A	B	A	A	B	A	B	A	B	A	X	B	A	A	B	B	A	A
AX-109545993	13	52.537	X	B	X	A	A	A	A	B	B	A	B	B	B	B	B	X	X	B	A	A	A	A	B	B	A	B	B	X	B	A	B	A	A	B	B	B	A	B	A	X	B	A	A	B	B	A	A
AX-109654287	13	52.896	X	B	X	A	A	A	A	B	B	A	B	B	X	B	B	X	X	B	A	A	A	A	B	B	A	B	B	X	B	A	X	A	A	B	A	B	A	X	A	X	B	A	A	X	B	A	A
AX-110122255	13	53.009	B	B	X	A	A	A	A	B	B	A	B	B	B	B	B	X	X	B	A	A	A	A	B	B	A	B	B	X	B	A	B	A	A	B	A	B	A	B	A	X	B	A	A	B	B	A	A
AX-108897346	13	54.055	B	B	X	A	X	A	A	B	B	A	B	B	X	B	B	X	X	B	A	A	A	A	B	B	A	B	B	X	B	A	B	A	A	B	A	B	A	B	A	B	B	A	A	X	B	A	A
AX-110029324	13	54.59	X	B	X	A	A	A	A	B	B	A	B	B	B	B	B	B	X	B	A	A	A	A	B	B	A	B	B	A	B	A	X	A	A	B	A	B	A	X	A	X	B	A	A	X	B	A	A
AX-108764636	13	55.07	X	B	X	A	A	A	A	B	B	A	B	B	B	B	B	B	X	B	A	A	A	A	B	B	A	B	B	X	B	A	B	A	A	B	A	B	A	B	A	A	B	A	A	B	B	A	A
AX-108754051	13	55.673	X	B	X	A	X	A	A	B	B	A	B	B	X	B	B	X	X	B	A	A	A	A	B	B	A	B	B	X	B	A	B	A	A	B	A	B	A	X	A	A	B	A	A	B	B	A	A
AX-110556871	13	56.77	X	B	X	A	A	A	A	B	B	A	B	B	B	B	B	B	X	B	A	A	A	A	B	B	A	B	B	X	B	A	B	A	A	B	A	B	A	X	A	A	B	A	A	X	B	A	A
AX-110939747	13	57.443	X	B	X	A	A	A	A	B	B	A	B	B	A	B	B	X	X	B	A	A	A	A	B	B	A	B	B	A	B	A	B	A	A	B	A	B	A	B	A	A	B	A	A	A	B	A	A
AX-108845112	13	58.212	B	B	X	X	X	A	A	B	B	A	B	B	A	B	B	B	X	B	A	A	A	A	B	B	A	B	B	X	B	A	B	A	A	B	A	B	A	B	A	A	B	A	A	A	B	A	A
AX-111028216	13	58.483	B	B	X	X	A	A	A	B	B	A	B	B	A	B	B	X	X	B	A	A	A	A	B	B	A	B	B	X	B	A	X	A	A	B	A	B	A	B	A	A	B	A	A	A	B	A	A
AX-109391774	13	59.592	B	B	B	X	X	A	A	B	B	A	B	B	A	B	B	B	X	B	A	A	A	A	B	B	A	B	B	X	B	A	X	A	A	B	A	B	A	B	A	A	B	A	A	A	B	A	A
AX-110995710	13	60.05	B	B	X	X	A	A	A	B	B	A	B	B	A	B	B	B	X	B	A	A	A	A	B	B	A	B	B	B	B	A	X	A	A	B	A	B	A	X	A	A	B	A	A	A	B	A	A
AX-111114587	13	60.666	X	B	X	B	A	A	A	B	B	A	B	B	A	B	B	A	A	B	A	A	A	A	B	B	A	B	B	B	B	A	X	A	A	X	A	B	A	X	A	A	B	A	A	A	B	A	A
AX-109507034	13	63.705	B	B	X	X	B	A	A	B	B	A	B	B	X	B	B	A	X	B	A	A	A	A	B	B	A	B	B	X	B	A	B	A	A	X	A	B	B	X	A	A	B	A	A	A	B	A	A
AX-108871303	13	63.852	X	B	X	X	B	A	A	B	B	A	B	B	B	B	B	A	X	B	A	A	A	A	B	B	A	B	B	X	B	A	B	A	A	X	A	B	B	X	A	A	B	A	A	A	B	A	A
AX-109999965	13	64.086	B	B	B	X	B	A	A	B	B	A	B	B	B	B	B	X	X	B	A	A	A	A	B	B	A	B	B	A	B	A	B	A	A	B	A	B	B	X	A	A	B	A	A	A	B	A	A
AX-111074979	13	64.533	X	B	X	X	B	A	A	B	B	A	B	B	X	B	B	X	X	B	A	A	A	A	B	B	A	B	B	B	B	A	X	A	A	X	A	B	B	X	A	A	B	A	A	A	B	A	A
AX-110397149	13	65.105	B	B	X	B	B	A	A	B	B	A	B	B	X	B	B	B	X	B	A	A	A	A	B	B	A	B	B	X	B	A	B	A	A	B	A	B	B	X	A	A	B	A	A	X	B	A	A
AX-108891432	13	66.625	B	B	X	B	B	A	A	B	B	A	B	B	A	B	B	X	X	X	A	A	X	A	B	B	A	B	B	X	B	A	B	A	A	B	A	B	B	X	A	A	B	A	A	A	B	A	B
AX-111454699	13	66.832	B	B	X	B	B	A	A	B	B	A	B	B	A	B	B	X	X	B	A	A	X	A	B	B	A	B	B	X	B	A	B	A	A	B	A	B	B	X	A	A	B	A	A	A	B	A	B
AX-110483979	13	67.465	B	B	X	B	B	A	A	B	X	A	B	B	A	B	B	X	X	X	A	A	X	A	B	B	A	B	B	X	B	A	B	B	A	B	A	B	B	X	A	A	B	A	A	A	B	A	B
AX-110004899	13	67.572	X	B	X	B	B	A	A	B	B	A	B	B	A	B	B	X	X	B	A	A	X	A	B	B	A	B	B	X	B	A	B	B	A	B	A	B	B	A	A	A	B	A	A	A	B	A	B
AX-110527412	13	68.171	B	B	B	B	B	A	A	B	X	A	B	B	A	B	B	X	X	X	A	A	X	A	B	B	A	B	B	A	B	A	B	A	A	B	A	B	B	X	A	A	B	A	A	X	B	A	B
AX-109329369	13	68.983	B	B	X	B	B	A	A	B	B	A	B	A	A	B	B	X	X	X	A	A	X	A	B	B	A	B	B	X	B	A	B	A	A	B	A	B	B	X	A	A	B	A	A	X	B	A	B
AX-110683877	13	69.716	X	B	X	B	B	A	A	B	B	A	B	A	A	B	B	X	X	X	A	A	X	A	B	B	A	B	B	X	B	A	B	A	A	B	A	B	B	X	A	A	B	A	A	X	B	A	X
AX-108832414	13	71.913	B	B	X	B	B	A	A	B	B	A	A	X	A	B	B	A	X	B	A	A	X	A	B	B	A	B	B	X	B	A	B	A	A	B	A	B	B	A	A	A	B	A	A	A	B	B	A
AX-111029956	13	74.983	B	A	X	B	B	A	A	B	B	A	A	A	A	B	B	A	X	X	A	A	X	A	B	A	A	B	B	X	B	A	B	A	A	B	A	B	B	X	A	A	B	A	A	A	B	A	X
AX-109440091	13	75.432	B	A	B	B	B	A	A	B	X	A	A	A	A	B	B	A	X	X	A	A	A	A	B	A	A	B	B	X	B	A	B	A	A	B	A	B	B	A	A	A	B	A	A	X	B	A	X
AX-111552125	13	75.615	B	A	B	B	B	A	A	B	B	A	A	A	A	B	B	X	X	X	A	A	X	A	B	A	A	B	B	X	B	A	B	A	A	B	A	B	B	X	A	A	B	A	A	A	B	A	X
AX-110048492	13	76.929	B	A	B	B	B	A	A	B	X	A	A	A	A	B	B	A	X	A	A	A	X	A	B	A	A	B	B	X	B	A	B	A	A	B	A	B	B	A	A	A	B	A	A	A	B	A	X
AX-111216294	13	77.225	B	A	B	B	B	A	A	B	B	A	A	A	A	B	B	X	X	A	A	A	X	A	B	A	A	B	B	X	B	A	B	A	A	B	A	B	B	X	A	A	B	A	A	A	B	A	X
AX-111673092	13	77.873	B	A	B	B	B	A	A	B	X	A	A	A	A	B	B	X	X	A	A	A	A	A	B	A	A	B	B	X	B	A	B	A	A	B	A	B	B	X	A	A	B	A	A	A	B	A	X
AX-110456271	13	78.271	X	A	B	B	B	A	A	B	B	A	A	A	A	B	B	X	X	A	A	A	A	A	B	A	A	B	B	X	B	A	B	A	A	B	A	B	B	X	A	A	B	A	A	X	B	A	X
AX-108771079	13	79.018	A	A	B	B	B	A	A	B	B	A	A	A	A	B	B	X	X	A	A	A	A	A	B	A	A	B	B	X	B	A	B	A	A	B	A	B	B	X	A	A	B	A	A	X	B	A	X
AX-109294847	13	79.629	X	A	B	B	B	A	A	B	B	A	A	A	A	B	B	X	X	A	A	A	A	A	B	A	A	B	B	B	B	A	B	A	A	B	A	B	B	B	A	B	B	A	A	X	B	A	X
AX-110381387	13	79.746	A	A	B	B	B	A	A	B	X	A	A	A	A	B	B	X	X	A	A	A	A	A	B	A	A	B	B	B	B	A	B	A	A	B	A	B	B	B	A	B	B	A	A	X	B	A	X
AX-109979203	13	81.326	A	A	B	B	B	B	A	B	X	A	A	A	A	B	B	X	X	A	A	A	A	A	B	A	A	B	B	B	B	A	B	A	A	B	A	B	B	B	A	B	B	A	A	X	B	A	B
AX-111546462	13	81.841	X	A	B	B	B	B	A	B	X	A	A	A	A	B	B	X	X	A	A	A	A	A	B	A	A	B	B	B	B	A	B	A	A	B	A	B	B	B	A	B	B	A	A	X	B	A	X
AX-108959357	13	82.295	X	A	B	B	B	B	A	B	X	A	A	A	A	B	B	X	X	A	A	A	A	A	B	A	A	B	B	X	B	A	B	A	A	B	A	B	B	B	A	B	B	A	A	A	B	A	X
AX-109913233	13	83.09	A	A	B	B	B	B	A	B	X	A	A	A	A	B	B	A	X	A	A	A	A	A	B	A	A	B	B	A	B	A	B	A	A	B	A	X	B	B	A	B	B	A	A	A	B	A	X
AX-109316178	13	83.598	X	A	B	B	B	B	A	B	X	A	A	A	A	B	B	A	A	A	A	A	A	A	B	A	A	B	X	A	B	A	B	B	A	B	A	X	B	B	A	B	B	A	A	A	B	A	X
AX-110510387	13	84.769	A	A	B	B	B	B	A	B	X	A	A	A	A	B	B	X	X	A	A	A	A	A	B	A	A	A	B	X	B	A	B	A	A	B	A	B	B	B	A	B	X	A	A	A	B	A	X
AX-111136305	13	85.471	A	A	B	B	B	B	A	B	X	A	A	A	A	B	B	A	X	A	A	A	A	A	B	A	A	A	B	A	B	A	B	A	A	B	A	B	B	B	A	B	X	A	A	A	B	A	X
AX-110992344	13	86.349	A	A	B	B	B	B	A	B	X	A	A	A	A	B	B	X	A	A	X	A	A	A	A	A	A	A	B	X	B	A	B	A	A	B	A	B	B	B	A	B	X	A	A	A	B	A	X
AX-108937402	13	88.593	A	A	B	B	B	B	A	B	X	A	X	A	A	B	B	X	A	A	A	A	A	A	X	A	A	A	B	X	B	A	B	A	B	B	A	B	B	B	A	B	X	A	A	A	B	A	B
AX-111482651	13	89.21	A	A	B	B	B	B	A	B	X	A	A	A	A	B	B	A	A	A	A	A	A	A	A	A	A	A	B	A	B	A	B	A	B	B	A	B	B	B	A	B	X	A	A	A	B	A	B
AX-111619293	13	89.458	A	A	B	B	B	B	A	B	A	A	X	A	A	B	B	X	A	A	A	A	A	A	X	A	A	A	B	X	B	A	B	A	B	B	A	B	B	B	A	B	X	A	A	A	B	A	B
AX-110714934	13	90.201	A	A	B	B	B	B	A	B	A	A	X	A	A	B	B	X	A	A	A	A	A	A	X	A	A	A	B	X	X	A	B	A	B	B	A	B	B	B	A	B	X	A	A	A	B	A	X
AX-108961366	13	90.427	A	A	B	B	B	B	A	B	B	A	X	A	A	B	B	X	A	A	A	A	A	A	A	A	A	A	B	X	X	A	B	A	B	B	A	B	B	B	A	B	X	A	A	A	B	A	X
AX-109435266	13	91.263	B	A	B	B	B	B	A	B	A	A	A	A	A	B	B	X	X	A	A	A	A	A	A	A	A	A	B	X	B	A	B	B	B	B	A	B	B	B	A	B	X	A	A	X	B	A	B
AX-109385182	13	92.929	A	A	B	B	B	B	A	B	B	A	X	A	A	B	B	A	A	A	A	A	A	A	X	A	A	A	B	X	X	A	B	A	B	B	A	B	B	B	A	B	X	A	A	A	B	A	A
AX-111539014	13	99.258	A	A	B	B	B	B	A	B	B	A	B	A	A	A	A	X	A	A	A	B	A	A	X	A	B	A	B	X	X	A	B	A	B	B	A	B	B	B	A	B	X	A	A	A	B	A	A
AX-109934392	13	100.782	A	A	B	B	B	B	A	B	B	A	B	A	A	A	A	X	A	A	B	B	A	A	X	A	B	A	B	X	X	A	B	A	B	B	A	B	B	B	A	B	X	A	A	X	B	A	A
AX-108861187	13	102.803	X	A	B	B	B	B	B	B	B	B	B	A	A	X	A	A	A	A	B	B	A	A	X	A	B	A	B	X	X	A	X	A	B	X	A	B	B	B	A	B	A	A	A	X	B	A	A
AX-110020985	13	103.08	A	A	B	B	B	B	B	B	B	B	B	A	A	A	A	A	A	A	X	B	A	A	X	A	B	A	B	X	X	A	A	A	B	B	A	X	B	B	A	B	A	A	A	A	B	A	A
AX-109878258	13	103.831	X	A	B	B	B	B	B	B	B	B	B	A	A	A	A	X	A	A	X	B	A	A	X	A	B	A	B	B	X	A	A	B	B	B	A	X	B	B	A	B	A	A	A	X	B	A	A
AX-109369427	13	107.47	X	A	B	X	B	B	B	B	B	B	B	A	A	X	A	X	A	A	B	A	A	A	X	A	B	A	B	X	X	A	X	A	B	X	A	B	B	B	A	B	A	A	A	X	B	A	A
AX-109814839	13	110.966	X	A	B	X	B	B	B	B	B	B	B	A	B	X	A	A	A	A	B	A	A	A	X	A	B	A	B	X	B	B	X	A	B	B	A	B	B	B	A	B	A	A	A	X	B	A	A
AX-110373243	13	113.578	A	A	B	X	B	B	B	B	B	B	B	A	B	A	A	A	A	A	B	A	A	X	X	A	B	A	B	X	B	B	X	A	B	X	A	B	B	B	A	B	A	A	A	A	X	A	A
AX-108947827	13	122.134	B	A	B	X	B	B	B	B	B	B	B	B	A	A	A	A	A	A	X	A	B	X	A	A	B	A	A	X	B	B	B	A	B	X	A	B	B	B	A	B	A	A	A	X	B	B	A
AX-108725465	13	122.516	A	A	X	A	A	A	A	A	A	A	A	A	A	A	A	A	A	A	X	A	A	A	A	A	X	A	A	A	A	A	A	A	A	X	A	A	A	A	A	A	A	A	A	A	A	A	A
AX-110974043	13	124.164	B	A	X	X	B	B	B	B	B	B	B	B	X	A	A	A	A	A	B	A	B	X	A	A	B	A	A	A	B	B	B	A	B	B	A	B	B	B	A	B	A	A	A	A	B	B	A
AX-109940922	13	125.026	B	A	B	X	B	B	B	B	B	B	B	B	B	A	A	A	A	A	B	A	B	X	A	A	B	A	A	X	B	B	B	A	B	B	A	B	B	B	A	B	A	A	A	A	B	B	A
AX-111596791	13	126.378	B	A	B	X	B	B	B	B	B	B	B	B	B	A	A	A	A	A	B	A	B	X	A	A	B	A	A	X	B	B	B	A	B	X	A	B	B	B	A	B	A	A	A	X	B	B	A
AX-110954181	13	126.599	B	A	X	X	B	B	B	B	B	B	B	B	B	A	A	A	A	A	B	A	B	X	A	A	B	A	A	B	B	B	B	A	B	X	A	B	B	B	A	B	A	A	A	X	B	B	A
AX-110433682	13	127.362	B	A	X	X	B	B	B	B	B	B	B	B	B	A	B	A	A	A	B	A	B	X	A	A	B	A	A	X	B	B	B	A	B	X	A	B	B	B	A	B	A	A	A	A	B	B	A
AX-109398663	13	127.892	B	A	X	X	B	B	B	B	B	B	B	B	B	A	B	A	A	A	B	A	B	X	A	A	X	A	A	X	B	B	B	A	B	X	A	B	B	B	A	B	A	A	A	A	B	B	A
AX-109440575	13	130.321	B	A	X	X	B	B	B	B	A	B	B	B	B	A	B	A	A	A	B	A	B	X	A	A	B	A	A	X	B	B	B	A	B	X	A	B	B	B	A	B	A	A	A	A	B	B	A
AX-109907430	13	130.9	B	A	X	X	B	B	B	B	A	B	B	B	B	A	B	A	A	A	B	A	B	X	A	A	B	A	A	B	B	B	B	A	B	X	A	B	B	B	A	B	A	A	A	X	B	B	A
AX-111519791	13	131.309	B	A	X	X	B	B	B	B	A	B	B	B	B	A	B	A	A	A	B	A	B	X	A	X	B	A	A	X	B	B	B	A	B	X	A	B	B	B	A	B	A	A	A	A	B	B	A
AX-111463040	13	132.402	B	A	X	X	B	B	B	B	A	B	B	B	B	A	B	A	A	A	B	A	B	X	A	X	B	A	A	X	B	X	B	A	B	X	A	B	B	B	A	B	A	A	A	A	A	B	A
AX-111117681	13	134.384	B	A	X	X	B	B	B	B	A	B	B	B	B	A	B	A	A	A	B	A	B	X	A	B	B	A	A	X	B	X	B	A	B	X	A	B	B	B	A	B	A	A	A	A	A	B	A
AX-110923044	13	135.302	B	A	X	X	B	B	B	B	A	B	B	B	B	A	B	A	A	A	B	A	B	B	A	B	B	A	A	B	B	X	B	A	B	X	A	B	B	B	A	B	A	A	A	X	A	B	A
AX-108892891	13	136.476	B	A	X	X	B	B	B	B	A	B	B	B	X	A	B	A	A	A	B	A	B	B	A	B	B	A	A	X	B	X	B	B	B	X	A	B	B	B	A	B	A	A	A	A	A	B	A
AX-110925417	13	137.064	B	A	X	X	B	B	B	B	A	B	B	B	X	A	B	A	A	A	B	A	B	B	A	B	B	A	A	B	B	X	B	A	B	X	A	B	B	B	A	B	A	A	A	X	A	B	A
AX-110508849	13	137.515	B	A	X	X	B	B	B	B	A	B	B	B	X	A	B	A	A	A	B	A	B	B	A	B	B	A	A	B	B	X	B	B	B	X	A	B	B	B	A	B	A	A	A	A	A	B	A
AX-109426929	13	137.839	B	A	X	X	B	B	B	B	A	B	B	B	X	A	B	A	A	A	B	A	B	B	A	B	B	A	A	B	B	X	B	B	B	X	A	B	B	B	A	B	A	A	A	X	A	B	A
AX-109696789	13	138.718	B	A	B	B	B	B	B	B	A	A	B	B	A	A	B	A	A	A	B	A	B	B	A	B	B	A	A	B	B	B	B	A	B	B	A	B	B	B	A	B	A	A	A	B	X	B	A
AX-111096820	13	139.327	B	A	X	X	B	B	B	B	A	A	B	B	A	A	B	A	A	A	B	A	B	B	A	B	B	A	A	X	B	X	B	A	B	X	A	B	B	B	A	B	A	A	A	X	A	B	A
AX-108726875	13	140.216	B	A	X	X	B	B	B	B	A	A	B	B	X	A	B	A	A	A	B	A	B	B	A	B	B	A	A	B	B	X	B	B	B	X	A	B	B	B	A	B	A	A	A	X	A	B	A
AX-110996595	13	140.447	B	A	X	X	B	B	B	B	A	A	B	B	X	A	B	A	A	A	B	A	B	B	A	B	B	A	A	B	B	X	B	B	B	X	A	B	B	B	A	B	A	A	A	X	A	B	A
AX-110007191	13	141.258	B	A	X	X	B	B	B	B	A	A	X	B	X	A	B	A	A	A	B	A	B	B	A	B	B	A	B	B	B	X	B	B	B	X	A	B	B	B	A	B	A	A	A	X	A	B	X
AX-109284590	13	141.447	B	A	X	X	B	B	B	B	A	A	B	B	X	A	B	A	A	A	B	A	B	B	A	B	B	A	B	B	B	X	B	B	B	X	A	B	B	B	A	B	A	A	A	X	A	B	A
AX-110000863	13	141.915	B	A	X	X	B	B	B	B	A	A	X	B	X	A	B	A	A	A	B	A	B	B	A	B	B	A	B	B	B	X	B	B	B	X	A	B	B	B	A	B	A	A	A	X	A	B	X
AX-109624254	13	142.4	B	A	X	X	B	B	B	B	A	A	X	B	X	A	B	A	A	A	B	A	B	B	A	B	B	A	B	B	B	X	B	B	B	X	A	X	B	B	A	A	A	A	A	X	A	B	A
AX-110021952	13	142.971	B	A	X	X	B	B	B	B	A	A	B	B	X	A	B	A	A	A	B	A	B	B	A	B	B	A	B	X	B	X	B	B	B	X	A	B	B	B	A	A	A	A	A	X	A	B	A
AX-110455362	13	153.681	B	B	A	B	B	B	B	B	A	A	B	B	X	B	B	A	A	A	A	A	B	B	A	B	B	B	X	A	B	X	B	B	B	X	A	B	B	A	A	A	B	A	A	X	A	A	A
AX-111615414	13	155.657	X	B	A	B	B	B	B	B	A	A	B	B	X	B	B	A	A	A	A	X	B	B	A	B	A	B	X	A	B	X	B	B	B	X	X	B	B	A	A	A	B	A	A	X	A	A	A
AX-110521338	13	157.569	X	B	A	B	B	B	A	B	A	A	B	B	X	B	B	A	A	A	A	B	B	B	A	B	A	B	X	A	B	X	B	B	B	X	A	X	B	A	A	A	B	A	A	B	A	A	A
AX-111097689	13	160.4	X	B	A	B	B	B	A	B	A	A	B	B	X	B	B	A	A	A	A	B	B	B	A	B	A	B	A	B	B	A	B	B	B	X	A	B	B	A	A	A	X	B	A	X	A	A	X
AX-110951551	13	161.07	X	B	A	B	B	B	A	B	A	A	B	B	X	B	B	A	A	A	A	B	B	B	A	B	A	B	A	B	B	A	B	B	B	X	A	B	B	A	A	A	X	B	A	X	A	A	X
AX-111654317	13	161.972	X	B	A	X	B	X	A	B	A	A	X	X	X	B	B	A	A	A	A	X	B	B	A	X	A	B	A	B	X	A	B	A	B	X	A	B	B	A	A	A	A	B	A	X	A	A	A
AX-108792246	13	163.145	A	B	A	B	B	A	A	B	A	A	B	X	A	B	B	A	A	A	A	B	B	B	A	B	A	X	A	B	B	A	B	A	B	X	A	B	B	A	A	A	X	B	X	X	A	A	X
AX-110533502	13	175.917	X	B	A	X	B	A	B	B	A	A	B	A	X	B	B	A	A	A	A	B	B	B	A	B	B	B	A	B	X	A	A	X	X	X	A	B	B	A	B	A	A	X	A	X	A	A	B
AX-109284862	13	177.137	A	B	A	X	B	A	B	B	A	X	B	A	X	B	B	A	A	A	A	B	B	B	A	B	B	B	A	B	X	A	A	X	B	X	A	B	B	A	B	A	A	X	A	A	A	A	B
AX-109277512	13	177.699	A	B	A	X	B	A	B	B	A	X	B	A	X	B	B	B	A	A	A	B	B	B	A	B	B	B	A	B	X	A	A	X	X	A	A	B	B	A	B	A	A	X	A	A	A	A	B
AX-109898694	13	187.003	X	B	A	B	A	A	B	B	B	B	B	B	A	B	B	A	B	A	A	B	B	B	A	B	B	X	X	B	X	X	A	X	B	A	A	B	B	A	A	A	X	X	A	A	A	A	A
AX-109845075	14	0	A	B	A	X	A	A	A	B	A	A	A	B	A	B	A	B	A	X	A	B	B	B	X	B	A	A	B	X	A	A	B	A	A	B	B	B	A	A	X	A	B	B	A	X	A	A	B
AX-110575715	14	0.568	A	B	A	B	A	A	A	B	A	A	A	B	A	B	B	B	A	X	A	B	B	B	X	B	A	B	B	X	A	A	B	A	A	B	B	B	A	A	X	A	B	B	A	X	A	A	B
AX-108803584	14	2.272	X	B	A	B	A	A	A	B	A	A	A	B	A	B	B	B	A	X	A	B	B	B	X	B	A	A	B	X	A	A	B	A	A	B	B	B	A	B	B	B	B	B	A	X	A	A	B
AX-109972054	14	3.874	A	B	A	B	A	A	A	B	A	A	A	B	A	B	B	B	A	X	A	B	B	B	X	B	A	A	B	X	A	A	B	A	A	B	B	B	A	B	A	B	B	B	A	X	A	A	B
AX-111275167	14	6.683	B	B	A	A	A	A	A	B	A	A	A	B	A	B	B	X	A	X	A	B	B	B	A	B	A	B	B	A	A	A	B	B	A	B	B	B	A	A	A	A	B	B	A	A	A	A	B
AX-110384205	14	15.643	X	A	A	A	A	A	A	B	A	A	A	A	A	B	A	X	A	A	A	B	B	B	A	B	A	A	B	B	B	A	B	A	A	A	B	B	A	X	B	B	B	B	A	A	B	B	A
AX-108867348	14	24.632	B	B	X	X	B	A	B	B	B	A	A	A	B	A	B	B	B	B	A	B	B	A	B	B	B	B	B	B	A	B	B	B	B	A	A	B	B	B	B	X	B	B	X	X	A	A	B
AX-111599857	14	27.08	B	B	X	X	B	A	B	B	B	A	A	X	B	A	B	B	B	B	A	B	B	A	B	B	B	B	B	B	A	X	B	B	B	X	A	B	B	B	B	X	B	B	X	A	A	A	B
AX-110437696	14	31.342	B	A	X	X	B	A	A	B	B	A	A	B	B	A	B	B	B	B	X	B	B	A	B	B	B	A	B	X	B	A	B	A	B	A	A	B	B	B	A	B	B	B	B	A	A	A	A
AX-109859036	14	34.607	X	A	A	X	B	A	A	X	X	A	A	A	A	B	A	A	A	A	B	B	B	B	A	B	A	B	A	X	X	A	B	B	A	X	B	B	A	A	B	A	A	A	A	A	B	B	A
AX-110366047	14	34.613	B	A	X	A	B	A	A	B	B	B	A	B	B	A	B	B	B	B	X	B	B	A	B	B	B	A	B	X	X	A	B	A	B	A	A	B	B	B	A	B	B	B	B	A	B	A	A
AX-108774127	14	34.868	X	A	A	X	B	A	A	X	X	A	A	A	A	B	A	X	A	A	B	B	B	B	A	B	A	B	A	X	X	A	B	B	A	X	B	B	A	A	B	A	A	A	A	A	B	B	A
AX-110951617	14	34.999	B	A	X	A	B	A	A	B	B	B	A	B	B	A	B	B	B	B	X	B	B	A	B	B	B	A	B	X	X	A	B	A	B	A	A	B	B	B	A	B	B	B	B	A	B	A	A
AX-109286628	14	35.371	B	A	X	A	B	A	A	B	B	B	A	B	B	A	B	B	B	B	X	B	B	A	B	B	B	A	B	X	A	A	B	A	B	A	A	B	X	B	A	B	B	B	B	A	B	A	A
AX-109855795	14	35.986	X	A	A	X	B	A	A	X	B	A	A	A	A	B	A	A	A	A	B	B	B	B	A	B	A	B	A	X	X	A	B	B	A	X	B	B	A	A	X	A	A	A	X	A	B	B	A
AX-111699672	14	37.316	B	A	X	A	B	A	A	B	B	B	A	B	B	A	B	B	B	B	X	B	B	A	B	B	B	B	B	X	X	A	B	B	B	A	A	B	B	B	B	B	B	B	B	A	B	A	A
AX-111625343	14	39.267	B	A	X	A	B	A	B	B	B	B	A	B	X	A	B	A	B	B	A	B	B	A	B	B	B	B	B	X	X	A	B	B	B	A	A	B	B	B	B	B	B	B	B	A	B	A	A
AX-111235271	14	41.019	B	A	X	A	B	A	B	B	B	B	A	B	B	A	B	X	B	B	X	B	B	A	B	A	B	X	B	B	X	A	B	B	B	X	A	B	B	B	B	X	B	B	B	X	B	B	A
AX-109446306	14	41.34	B	A	X	A	B	A	B	B	B	B	A	B	X	A	B	A	B	B	X	B	B	A	B	B	B	X	B	X	X	A	B	B	B	A	A	B	B	B	B	B	B	B	B	A	B	A	A
AX-111523623	14	41.414	B	A	A	A	B	A	A	X	X	A	A	A	A	B	B	X	A	A	B	B	B	B	A	B	A	B	A	X	X	A	B	B	A	X	B	B	A	A	B	A	X	B	X	A	B	B	A
AX-110583248	14	41.875	B	A	X	A	B	A	B	B	B	B	A	B	X	A	B	A	B	B	X	B	B	A	B	B	B	X	B	X	X	A	B	B	B	A	A	B	B	B	B	X	B	B	B	A	B	B	A
AX-110397972	14	42.119	X	A	A	A	B	A	A	X	X	A	A	A	A	B	B	A	A	A	B	B	B	B	A	B	A	A	A	A	X	A	B	A	A	A	B	B	A	A	B	A	A	B	A	A	B	B	A
AX-111510853	14	42.518	X	A	A	A	B	A	B	B	B	B	A	B	X	A	B	A	B	B	A	A	B	A	B	A	B	A	B	X	A	A	B	B	B	A	A	B	B	B	B	A	B	B	B	A	B	B	A
AX-109056599	14	42.887	X	A	A	A	B	A	B	B	B	B	A	B	X	A	B	A	B	B	A	B	B	A	B	A	B	A	B	A	A	A	B	B	B	A	A	B	B	B	B	X	B	B	B	A	B	B	A
AX-111024537	14	43.662	B	A	X	A	B	A	B	B	B	B	A	B	X	A	B	A	B	B	X	A	B	A	B	B	B	X	B	A	A	A	B	B	B	X	A	B	B	B	B	X	B	B	B	A	B	B	A
AX-110970244	14	44.178	B	A	X	X	B	A	B	B	B	B	A	B	X	A	B	A	B	B	X	A	B	A	B	B	B	X	B	A	A	A	B	B	B	A	A	B	B	B	B	X	B	B	B	A	B	B	A
AX-111540807	14	45.068	X	A	A	X	B	A	A	B	B	A	A	A	A	B	B	X	A	A	B	B	B	B	A	B	A	A	A	X	X	A	B	A	X	X	B	B	A	A	B	A	X	B	X	X	B	B	A
AX-109515820	14	45.117	B	B	X	X	B	A	B	B	B	B	A	B	X	A	B	A	B	B	A	A	B	A	B	B	B	X	B	A	A	A	B	B	B	A	A	B	B	B	B	X	B	B	B	A	B	B	A
AX-109856154	14	45.835	B	B	X	A	B	A	B	B	B	B	A	B	X	A	B	A	B	B	X	A	B	A	B	B	B	X	B	A	X	A	B	B	B	A	A	B	B	B	B	X	B	B	B	A	B	B	A
AX-110384815	14	46.085	X	B	X	A	B	A	B	B	B	B	A	B	B	A	B	A	B	B	A	A	B	A	B	B	B	X	B	A	A	A	B	B	B	A	A	B	X	B	B	X	B	B	B	A	B	B	A
AX-109982380	14	46.161	B	B	X	A	B	A	B	B	B	B	A	B	X	A	B	A	B	B	X	A	B	A	B	B	B	A	B	A	X	A	B	B	B	A	A	B	B	B	B	X	B	B	B	A	B	B	A
AX-111461446	14	46.206	X	A	A	X	B	A	A	B	X	A	A	A	A	B	B	X	B	A	B	B	B	B	A	B	A	A	X	B	B	A	B	A	X	X	B	B	A	A	B	A	X	B	X	A	B	B	A
AX-109940171	14	46.789	X	A	A	X	B	A	A	B	B	A	A	A	A	B	B	A	B	A	B	B	B	B	A	B	A	A	A	X	X	A	B	A	A	X	B	B	A	A	B	A	X	B	X	A	B	B	A
AX-110398218	14	47.825	B	B	X	A	B	A	B	B	B	B	X	B	X	A	B	A	B	B	X	A	B	A	B	B	B	X	B	A	X	A	B	B	B	A	A	B	B	B	A	X	X	B	B	X	B	B	A
AX-108796912	14	48.581	X	A	A	A	B	A	A	A	X	A	A	A	A	B	B	A	B	A	B	B	B	B	A	B	A	A	A	X	A	A	B	A	A	A	B	B	A	A	B	A	A	B	A	A	B	B	A
AX-110141414	14	49.01	X	B	X	A	B	A	B	B	B	B	X	X	X	A	B	A	B	B	X	A	A	A	B	B	B	A	B	A	X	A	B	B	B	A	A	B	B	B	A	A	X	B	B	X	B	B	A
AX-109336899	14	49.547	X	B	A	A	B	A	B	B	X	B	A	B	A	A	B	A	B	B	A	B	A	A	B	B	B	A	B	A	X	A	B	B	B	A	A	B	B	B	A	X	A	B	B	A	B	B	A
AX-108902352	14	50.835	B	B	X	A	B	A	B	B	B	B	X	B	X	A	B	A	B	B	X	B	A	A	B	B	B	X	B	A	X	A	B	B	X	A	A	B	B	B	A	X	X	B	B	A	A	B	A
AX-109984472	14	51.622	B	B	X	A	B	A	B	B	B	B	X	B	A	A	B	A	B	B	X	B	A	A	B	B	B	X	B	A	X	A	B	B	X	A	A	B	B	B	A	X	X	B	B	X	A	B	A
AX-109383338	14	51.779	B	A	A	X	B	A	A	X	B	A	A	A	A	B	A	X	B	A	B	B	B	B	A	B	A	A	A	X	X	A	A	A	A	X	B	B	A	A	B	A	B	B	B	A	B	B	A
AX-111478786	14	51.823	X	B	X	X	B	A	B	B	B	B	X	B	X	A	B	A	B	B	X	B	A	A	B	B	B	X	B	A	X	A	B	B	X	X	A	B	B	B	A	X	X	A	B	X	A	B	A
AX-108929247	14	52.461	X	B	A	A	B	A	B	B	B	B	A	B	A	A	B	A	B	B	A	B	A	A	B	B	B	A	B	A	X	A	B	B	X	A	A	B	B	B	A	X	B	A	B	A	A	B	A
AX-108770687	14	52.708	B	A	A	A	B	A	A	X	B	A	A	A	A	B	B	X	B	A	B	B	B	B	A	B	A	A	A	X	X	A	A	A	A	X	B	B	A	A	B	A	X	B	X	A	B	B	A
AX-109512386	14	52.855	B	B	X	A	B	A	B	B	B	B	B	A	A	A	B	A	B	B	A	B	A	A	B	B	B	X	B	A	X	A	B	B	X	A	A	B	X	B	B	X	B	A	B	A	A	B	B
AX-108730255	14	53.283	X	A	A	X	B	A	A	X	B	A	A	A	A	B	A	X	B	A	B	B	B	B	A	B	A	A	A	X	X	A	A	A	A	X	B	B	A	A	B	A	X	B	X	A	B	B	A
AX-109942290	14	53.442	B	B	X	A	B	A	B	B	B	B	B	A	A	A	B	A	B	B	X	B	A	A	B	B	B	X	B	A	X	A	B	B	B	A	A	B	X	B	B	X	B	A	B	X	A	B	B
AX-110200099	14	53.553	B	B	X	A	B	A	B	B	B	B	B	A	A	A	B	A	B	B	X	B	A	A	B	B	B	A	B	A	X	A	B	B	B	A	A	B	X	B	B	B	B	A	B	X	A	B	B
AX-108809180	14	53.9	B	B	X	A	B	A	B	B	B	B	B	A	A	A	B	A	B	B	X	B	A	A	B	B	B	X	B	A	X	A	B	B	X	A	A	B	X	B	A	X	B	A	B	A	A	B	A
AX-111039767	14	54.27	B	B	X	A	B	A	B	B	B	B	B	A	A	A	B	A	B	B	X	B	A	A	B	B	B	A	B	A	B	A	B	A	X	X	A	B	X	B	A	B	B	A	B	X	A	B	A
AX-108890228	14	54.429	B	B	X	A	B	A	B	B	B	B	B	A	A	A	B	A	B	B	A	B	A	A	B	B	B	A	B	A	X	A	B	A	X	A	A	B	X	B	B	X	B	A	B	A	A	B	B
AX-111280385	14	55.107	B	B	X	A	B	A	B	B	B	B	B	A	A	A	B	X	B	B	X	B	A	A	B	B	B	X	B	A	X	A	B	B	B	X	A	B	X	B	B	X	B	A	B	X	A	B	B
AX-110581705	14	55.196	B	A	A	X	B	A	A	A	B	A	A	A	A	B	A	A	B	A	B	B	B	B	A	B	A	B	A	A	X	A	A	B	A	A	B	B	A	A	B	A	X	B	B	A	B	B	A
AX-110967528	14	55.38	B	B	X	A	B	A	B	B	B	B	B	A	A	A	B	A	B	B	A	B	A	A	B	B	B	A	B	A	X	A	B	A	B	A	A	B	X	B	B	B	B	A	B	A	A	B	B
AX-109885978	14	55.512	B	A	A	A	B	A	A	X	B	A	A	A	A	B	A	X	B	X	B	B	B	B	A	B	A	B	A	X	B	A	A	B	X	X	B	B	A	A	B	A	B	B	B	A	B	B	A
AX-111464471	14	55.562	B	B	X	A	B	A	B	B	B	B	B	A	A	A	B	A	B	B	A	B	A	A	B	B	B	A	B	A	X	A	B	A	B	A	A	B	X	B	A	B	B	A	B	A	A	B	A
AX-109896871	14	55.755	B	B	X	X	B	A	B	B	B	B	B	A	A	A	B	A	B	B	A	B	A	A	B	B	B	X	B	A	X	A	B	B	B	X	A	B	X	B	A	X	B	A	B	X	A	B	A
AX-108851033	14	55.866	B	B	X	A	B	A	B	B	B	B	B	A	A	A	B	A	B	B	X	B	A	A	B	B	B	X	B	A	X	A	B	B	B	X	A	B	X	B	A	X	B	A	B	X	A	B	A
AX-110560349	14	56.002	B	B	X	X	B	A	B	B	B	B	X	A	A	A	B	A	B	B	X	B	A	A	B	B	B	X	B	A	X	A	B	B	B	A	A	B	X	B	A	X	B	A	B	X	A	B	A
AX-109490112	14	56.385	B	B	X	A	B	A	B	B	B	B	B	A	X	A	B	A	B	B	X	B	X	A	B	B	B	A	B	A	B	A	B	A	B	X	X	B	B	B	A	B	B	A	B	X	A	B	A
AX-109051999	14	57.519	B	B	X	X	B	A	B	B	B	B	B	A	A	A	B	A	B	B	X	B	A	A	B	B	A	A	B	A	X	A	B	A	B	A	A	B	X	B	A	X	B	A	B	A	A	B	A
AX-109828198	14	57.941	B	A	A	X	B	A	A	A	B	A	A	B	A	B	A	A	B	A	B	B	B	B	A	B	B	B	A	X	B	A	A	B	X	A	B	B	A	A	X	A	X	X	B	A	B	B	A
AX-109651702	14	58.897	B	A	A	X	B	A	A	A	B	A	A	A	A	B	A	X	B	X	B	B	B	B	A	B	B	A	A	X	B	A	A	A	B	X	B	B	A	A	B	A	B	X	B	A	B	B	A
AX-110460557	14	59.03	B	B	X	X	B	A	B	B	B	B	B	A	A	A	B	A	B	B	X	B	A	A	B	B	A	A	B	A	A	A	B	B	X	A	A	B	B	B	A	X	B	A	B	X	A	A	A
AX-110108283	14	59.679	B	B	X	A	B	A	B	B	B	B	B	A	A	A	B	A	B	B	X	B	A	A	B	B	A	A	B	A	X	A	B	A	B	X	A	B	B	B	A	B	B	A	B	X	A	X	A
AX-108977887	14	60.253	B	B	X	X	B	A	B	B	B	B	B	A	A	A	B	X	B	B	A	B	A	A	B	B	A	A	B	A	X	A	B	B	X	A	A	B	B	B	A	B	B	A	B	X	A	A	A
AX-108936241	14	62.225	A	A	A	X	B	X	A	A	B	A	A	B	X	B	A	A	B	A	B	B	B	B	A	B	B	A	A	X	B	A	A	A	B	X	B	B	A	A	B	A	A	B	B	A	B	B	A
AX-109847779	14	62.635	B	B	X	X	B	A	B	B	B	B	B	A	A	A	B	A	B	B	X	B	A	A	B	B	A	A	B	A	A	A	B	A	X	B	A	B	B	B	B	X	B	A	B	X	A	X	B
AX-109417321	14	63.042	A	A	A	X	B	A	A	A	B	A	A	B	X	B	A	A	B	A	B	B	B	B	A	B	B	A	A	B	B	A	A	A	B	X	B	B	A	A	B	A	A	B	B	A	B	B	A
AX-109939697	14	63.199	B	B	X	X	B	A	B	B	B	B	B	A	A	A	B	A	B	B	X	B	A	A	B	B	A	A	B	X	X	X	B	A	B	B	A	B	B	B	B	B	B	A	B	X	A	X	A
AX-111472432	14	63.573	B	B	X	X	B	A	B	B	B	B	B	A	A	A	B	X	B	B	X	B	A	A	B	B	B	X	B	X	X	X	B	B	B	B	A	B	B	B	B	X	B	A	B	A	A	B	A
AX-109329070	14	64.136	B	B	A	A	B	A	B	B	B	B	B	A	A	A	B	X	B	B	X	B	A	A	B	B	B	X	B	A	A	X	B	B	B	B	A	B	B	B	B	X	B	A	B	A	A	B	A
AX-109827342	14	65.365	A	A	A	B	B	A	A	A	X	A	B	X	X	B	A	A	B	A	B	B	X	B	A	B	B	A	A	X	B	A	A	A	B	X	B	B	A	A	X	A	A	B	B	X	B	B	A
AX-110381756	14	65.431	B	B	A	X	B	A	B	B	B	B	B	A	A	A	B	X	B	B	X	B	A	A	B	B	B	X	B	A	A	X	B	B	X	B	A	B	B	B	B	X	B	A	B	X	A	B	A
AX-110942939	14	66.217	B	B	X	A	B	A	B	B	B	B	B	A	A	A	B	A	B	B	X	B	B	A	B	B	B	A	B	A	X	X	B	A	B	B	A	B	B	B	B	B	B	A	B	X	B	B	A
AX-110022069	14	66.455	B	B	A	A	B	A	B	B	B	B	B	A	A	A	B	X	B	B	X	B	B	A	B	B	B	X	B	A	A	X	B	B	X	B	A	B	B	B	B	B	B	A	B	X	B	B	A
AX-110554992	14	66.75	A	A	A	X	B	A	A	A	X	A	B	X	X	B	A	B	B	A	B	B	B	B	A	B	B	A	A	X	B	A	A	A	B	X	B	B	A	A	B	A	A	B	B	X	B	B	A
AX-109834857	14	66.895	A	A	A	X	B	A	A	A	X	A	B	X	X	B	A	X	B	A	B	B	X	B	A	B	B	A	A	B	B	A	A	A	B	X	B	B	A	A	B	A	A	B	B	X	B	B	A
AX-108938195	14	67.093	B	B	X	X	B	A	B	B	B	B	B	A	A	A	B	A	B	B	X	B	B	A	B	B	B	A	B	A	X	X	B	A	B	B	A	B	B	B	B	B	B	A	B	A	B	B	A
AX-109460153	14	67.124	A	A	A	X	B	A	A	A	X	A	B	X	X	B	A	X	B	A	B	B	X	B	A	B	B	A	A	X	B	A	A	A	B	X	B	B	A	A	X	A	A	B	B	A	B	B	A
AX-108957255	14	68.199	B	B	A	X	B	A	B	X	B	B	B	A	A	A	A	X	B	B	X	B	B	A	B	B	B	X	B	A	A	X	B	B	B	B	A	B	B	B	B	X	B	A	X	X	B	B	A
AX-110410093	14	68.496	B	B	X	X	B	A	B	B	B	B	B	A	A	A	A	A	B	B	X	B	B	A	B	B	B	A	B	X	X	B	B	A	B	B	A	B	B	B	B	X	B	A	B	X	B	B	A
AX-110480594	14	68.74	A	A	A	X	B	A	A	A	X	A	X	X	A	B	A	B	B	X	B	B	X	B	A	B	B	A	A	X	B	A	A	A	B	A	B	B	A	B	B	B	A	B	B	A	B	B	X
AX-111116821	14	69.232	A	A	A	X	B	A	A	A	X	A	X	X	A	B	A	X	B	X	B	B	X	B	A	B	B	X	A	X	B	A	A	A	B	A	B	X	A	B	X	B	A	B	B	A	B	B	A
AX-108879462	14	69.538	B	A	A	X	A	A	B	B	B	B	B	A	A	A	A	X	B	B	A	B	B	A	B	B	B	X	B	A	A	X	B	B	B	B	A	B	B	B	B	B	B	A	X	X	B	B	A
AX-108988155	14	70.017	B	A	A	X	A	A	B	X	B	B	B	A	A	A	A	B	B	B	A	B	B	A	B	B	B	X	B	A	X	X	B	B	B	B	A	B	B	B	B	B	B	A	X	X	B	B	B
AX-111052445	14	71.084	B	A	X	A	A	A	B	X	B	B	B	A	A	B	A	X	B	B	A	B	B	A	B	B	B	X	B	A	A	X	B	B	X	B	A	B	B	B	B	B	B	A	X	X	B	B	A
AX-111570408	14	71.756	B	A	X	A	A	A	B	B	B	B	B	A	A	B	A	A	B	B	X	B	B	A	B	A	B	A	B	A	A	X	B	A	X	B	A	B	B	B	B	B	B	A	X	X	B	B	A
AX-109458647	14	72.181	A	B	A	A	B	A	A	A	A	A	A	X	A	B	A	X	B	A	B	B	X	B	A	B	B	A	A	A	B	A	B	A	B	B	B	X	A	B	B	B	A	B	A	A	B	B	X
AX-109958829	14	75.137	A	B	A	A	B	A	A	X	X	A	X	B	X	B	B	B	B	X	B	B	X	B	A	B	B	X	X	X	B	A	B	A	B	B	B	B	A	B	B	B	A	A	X	A	B	B	X
AX-110989430	14	75.372	A	B	A	A	B	A	A	X	X	A	X	B	X	B	B	B	B	X	B	B	B	B	A	B	B	X	X	X	B	A	B	A	B	B	B	B	A	B	B	B	A	A	X	A	B	B	X
AX-110941167	14	76.553	A	B	A	A	B	X	A	B	B	A	B	B	B	B	B	X	B	B	B	B	B	B	A	B	B	X	B	B	B	A	B	A	B	B	B	B	A	B	B	B	A	A	X	A	B	B	A
AX-109986419	14	77.399	A	B	A	A	B	A	A	X	X	A	X	X	X	B	B	X	B	X	B	A	X	B	A	B	B	X	X	X	B	A	B	A	B	B	B	B	A	B	B	B	A	A	X	A	B	B	A
AX-109990234	14	78.245	B	A	A	X	A	A	A	B	B	B	B	A	A	B	A	A	B	B	B	B	B	A	B	B	B	A	B	A	X	A	B	A	X	B	B	B	B	B	B	B	B	A	B	A	B	B	A
AX-110362237	14	78.795	B	A	A	X	A	A	A	X	B	B	B	A	A	B	A	A	B	B	B	B	B	A	B	B	B	A	B	A	X	A	B	A	B	B	B	B	B	B	B	B	B	A	B	A	B	B	A
AX-110404958	14	79.323	B	A	A	B	A	A	A	B	B	B	B	A	A	B	A	X	B	B	B	B	B	A	B	B	B	X	X	A	A	A	B	A	X	B	B	B	B	B	B	B	B	A	B	X	B	B	A
AX-109941289	14	79.85	B	B	A	A	B	A	A	X	A	A	X	B	X	B	B	X	B	X	B	A	X	B	A	A	B	X	X	B	B	A	B	A	B	B	B	B	A	B	B	B	A	A	X	A	B	B	A
AX-109648069	14	80.111	B	B	A	A	B	A	A	X	A	A	B	B	B	B	B	X	B	X	B	A	X	B	A	A	B	X	X	B	B	A	B	A	B	B	B	B	A	B	X	B	A	A	X	X	B	B	A
AX-111556818	14	80.978	B	A	A	B	A	A	A	X	B	B	B	A	A	B	A	A	B	B	B	B	B	A	B	B	B	A	B	A	A	A	B	B	X	B	B	B	B	B	B	B	B	A	X	A	B	B	B
AX-110924307	14	85.307	A	A	A	X	B	A	A	B	B	B	B	B	A	B	A	B	B	B	B	B	B	A	B	B	B	B	B	A	A	A	B	A	A	B	B	A	B	A	B	A	B	A	B	X	B	X	A
AX-111002705	14	87.273	A	A	A	A	B	A	B	B	B	B	B	B	A	B	A	X	B	B	B	B	B	A	B	B	B	X	B	A	X	A	B	A	A	B	B	B	B	A	A	A	X	X	B	X	B	B	A
AX-109914215	14	89.64	B	B	A	A	A	B	A	B	A	A	X	A	B	A	B	B	B	X	B	A	B	B	A	A	B	X	B	B	B	A	B	A	B	A	B	B	A	B	B	B	B	A	A	X	B	B	B
AX-110058364	14	90.189	A	A	A	X	B	A	B	B	B	B	B	B	A	B	A	B	B	X	B	X	B	A	B	B	B	B	X	A	X	A	B	A	A	B	B	B	B	A	A	A	X	X	B	A	X	B	A
AX-109917396	14	90.741	B	B	A	A	A	B	A	B	A	A	X	X	B	A	B	B	B	B	B	A	B	B	A	A	B	X	B	B	B	A	B	A	B	A	B	B	A	A	B	A	B	A	A	X	B	B	B
AX-110970568	14	91.243	B	B	A	A	A	B	A	B	A	A	X	A	B	A	B	X	B	X	B	A	X	B	A	A	B	X	B	X	B	A	B	A	B	A	B	B	A	A	B	A	X	A	A	X	B	A	B
AX-109939306	14	91.415	X	B	A	A	A	B	A	B	A	A	X	A	B	A	B	B	B	X	B	A	X	B	A	A	B	X	B	X	B	A	B	A	B	A	B	B	A	B	B	B	A	X	A	A	B	A	B
AX-108929069	14	92.91	A	A	A	A	B	A	B	B	B	B	X	B	A	X	A	X	B	X	B	A	B	A	B	A	B	X	X	A	X	A	B	A	A	B	B	B	B	A	X	A	B	X	B	A	X	B	A
AX-109349709	14	93.288	A	B	A	A	A	B	A	B	A	A	X	A	B	A	B	X	B	X	B	A	X	B	A	A	B	X	B	X	B	A	B	B	B	A	B	B	A	A	B	A	X	A	A	X	B	B	B
AX-108948115	14	93.554	A	B	A	A	A	B	A	B	A	A	X	A	B	A	B	X	B	X	B	A	X	B	A	A	B	A	B	X	B	A	B	B	B	A	B	B	A	A	B	A	X	A	A	X	B	B	B
AX-111512401	14	94.121	A	B	A	A	B	B	A	B	X	A	X	A	B	A	B	X	B	X	B	A	X	B	A	A	B	X	B	X	B	A	B	B	B	A	B	B	A	A	B	A	X	A	A	X	B	B	B
AX-109951695	14	94.871	A	B	A	A	B	B	A	B	X	B	X	A	B	A	B	B	B	X	B	A	X	B	A	A	B	X	B	X	B	A	B	B	B	A	B	B	A	A	B	A	X	A	A	X	B	B	B
AX-111472988	14	95.783	A	A	A	A	B	A	B	B	B	B	X	B	A	X	A	X	B	X	B	X	B	A	B	A	B	X	X	A	B	A	B	A	A	B	B	B	B	A	X	A	B	X	B	X	X	B	A
AX-110921023	14	98.118	A	A	A	A	B	A	B	B	B	B	X	B	A	X	A	B	B	X	B	X	B	A	B	A	B	B	A	A	X	A	B	A	A	B	B	B	B	A	X	A	B	A	B	X	B	B	B
AX-110130968	14	102.049	A	A	A	X	B	A	B	B	X	B	X	B	A	X	A	A	B	X	B	X	X	A	B	A	B	A	X	A	X	A	B	A	X	B	B	B	B	A	B	A	B	A	A	A	B	X	A
AX-110954915	14	102.169	A	A	A	X	B	A	B	B	B	B	X	B	A	X	A	X	B	X	B	X	X	A	B	A	B	X	X	A	X	A	B	A	A	B	B	B	B	A	X	A	B	A	A	X	B	B	A
AX-109282927	14	106.065	A	A	X	A	B	A	B	B	B	B	X	A	B	X	A	B	B	X	B	A	X	B	B	A	A	X	X	X	B	A	B	B	B	A	B	B	A	A	X	A	X	X	A	A	B	B	B
AX-110952221	14	107.649	A	A	X	X	B	A	B	B	B	B	X	A	B	X	A	B	B	X	B	X	X	B	B	A	A	A	X	X	B	A	B	B	B	A	B	B	A	A	B	A	X	X	A	X	B	A	B
AX-109276428	14	108.314	A	A	X	A	B	A	B	B	B	B	A	X	B	X	A	B	B	X	B	A	X	B	X	A	A	A	X	X	B	A	B	B	B	A	B	B	A	A	B	A	X	X	A	A	B	A	B
AX-110384536	14	109.024	A	A	X	X	B	A	B	B	B	B	A	X	B	X	A	B	B	X	B	X	X	B	B	A	A	B	X	A	B	A	B	B	B	A	B	B	A	A	B	A	X	X	A	X	B	A	B
AX-111705799	14	109.836	A	A	X	A	B	A	B	B	B	B	A	A	B	X	A	X	B	A	B	A	X	B	X	A	A	A	X	A	B	A	B	B	B	A	B	X	A	A	A	A	X	X	A	A	B	A	A
AX-109879014	14	112.372	A	A	X	X	B	A	B	B	B	B	X	X	B	X	A	B	B	X	B	X	X	B	B	A	A	B	X	X	B	A	B	B	B	B	B	B	A	A	B	A	X	X	A	X	B	A	B
AX-108831560	14	113.066	A	A	X	X	B	A	B	B	B	B	X	X	B	X	A	B	B	X	B	X	X	B	B	A	A	B	X	X	B	A	B	B	B	B	B	B	A	A	B	A	X	X	A	X	B	A	B
AX-109303722	14	113.556	A	A	X	X	B	A	B	B	B	B	A	X	B	X	A	B	B	X	B	X	X	B	B	A	A	B	B	A	B	A	B	B	B	B	B	B	B	A	X	A	X	X	A	X	B	A	B
AX-109038008	14	113.927	A	A	X	X	B	A	B	B	B	B	A	X	B	X	A	B	B	X	B	X	X	B	B	A	A	B	X	X	B	A	B	B	B	B	B	B	B	A	X	A	X	B	A	A	B	A	B
AX-110676363	14	114.521	A	A	X	X	B	A	B	B	B	B	X	X	B	X	A	B	B	X	B	X	X	B	B	A	A	B	X	X	B	A	B	B	B	B	B	B	B	A	X	A	X	X	A	X	B	A	B
AX-110505188	14	114.953	A	A	X	A	B	A	B	B	B	B	X	X	B	X	A	B	B	X	B	X	B	B	B	A	A	B	X	X	B	A	B	B	B	B	X	B	B	A	X	X	X	X	A	A	B	A	B
AX-111662281	14	115.323	A	A	X	A	B	A	B	B	B	B	X	X	B	X	A	B	B	X	B	X	X	B	B	A	A	B	X	X	B	A	B	B	B	B	B	B	B	A	X	A	X	X	A	X	B	A	B
AX-108829846	14	115.82	A	A	X	A	B	A	B	B	B	B	X	X	B	X	A	B	B	X	B	X	X	B	B	A	A	X	X	X	B	A	B	B	B	B	B	B	B	A	X	A	X	X	A	A	B	A	A
AX-108811000	14	117.045	A	A	X	X	B	A	B	B	B	B	X	X	B	X	A	B	B	X	B	X	X	B	B	A	A	B	X	X	B	A	B	B	B	B	B	B	B	A	X	A	X	X	A	X	B	A	B
AX-110931211	14	117.999	A	A	X	A	B	A	B	B	B	B	A	X	B	A	A	A	B	X	B	A	X	B	B	A	A	X	X	A	B	A	B	B	B	B	B	X	B	A	X	A	X	X	A	X	B	A	A
AX-110502620	14	118.717	A	A	X	A	B	A	B	B	B	B	A	X	A	X	A	X	B	X	B	X	X	B	B	A	B	X	X	X	X	A	B	B	B	B	B	B	B	A	X	A	B	A	A	A	B	A	A
AX-111019476	14	119.087	A	A	X	A	B	A	B	B	B	B	X	X	A	X	A	B	B	X	B	X	X	B	B	A	A	B	X	X	X	A	B	B	B	B	B	B	B	A	X	A	B	A	A	X	B	A	B
AX-89465863	15	0	A	B	B	B	A	A	A	A	X	B	B	B	B	A	A	B	B	X	A	A	A	A	X	A	B	B	B	X	B	X	A	B	A	X	A	B	B	A	X	A	B	A	X	A	B	A	A
AX-110974080	15	0.084	A	B	A	B	B	A	A	B	X	A	A	B	B	A	A	A	A	B	A	A	B	A	A	A	B	B	A	X	A	B	B	B	A	X	A	A	A	A	B	A	A	B	B	B	B	A	B
AX-109533874	15	2.075	A	B	A	B	B	A	A	B	X	A	A	B	B	A	A	A	A	B	A	A	B	A	A	X	B	B	A	X	A	B	B	A	A	X	A	A	A	A	A	A	A	B	B	B	B	A	A
AX-86173754	15	2.295	X	B	A	B	B	A	A	B	B	A	A	B	B	A	A	A	A	B	A	A	B	A	A	A	B	B	A	X	A	B	B	A	A	B	A	A	A	A	A	A	A	B	B	B	B	A	A
AX-111129891	15	2.689	X	B	A	B	B	A	A	B	B	A	A	B	B	A	A	A	A	B	A	A	B	A	A	A	B	B	A	X	A	B	B	A	A	B	A	A	A	A	A	A	A	B	B	B	B	A	B
AX-109031094	15	3.157	X	B	A	B	B	A	A	B	B	A	A	B	B	A	A	A	A	B	A	A	B	A	A	A	B	B	A	X	A	B	B	A	A	X	A	A	A	A	A	A	A	B	B	B	B	A	B
AX-109207441	15	6.9	A	B	X	B	B	A	A	B	A	A	A	B	B	A	A	A	A	B	A	A	B	A	A	A	B	B	A	X	A	X	B	A	A	X	A	A	A	A	B	A	A	B	X	X	B	A	B
AX-89390905	15	12.23	A	B	B	X	A	A	A	B	B	A	B	B	A	A	B	B	B	X	A	A	A	B	B	A	B	B	B	X	B	A	B	B	A	X	A	B	B	A	X	A	B	A	B	X	B	A	A
AX-108775585	15	15.016	X	B	A	B	B	B	A	B	A	A	A	A	B	A	A	A	A	B	A	A	B	A	A	A	A	B	A	A	A	B	B	A	A	X	B	A	A	A	A	A	A	B	X	X	B	A	A
AX-109394742	15	15.499	A	B	B	X	A	A	A	B	B	A	B	B	A	A	B	B	B	X	A	A	B	B	B	A	B	B	A	X	B	A	B	B	A	X	A	A	B	A	X	A	B	A	B	A	B	A	A
AX-89431101	15	18.641	A	B	B	B	A	A	A	B	B	A	B	B	X	A	B	B	B	X	A	A	B	A	A	A	B	B	X	A	A	A	B	B	A	X	A	A	B	A	X	A	B	A	B	X	B	A	A
AX-110580874	15	20.785	X	B	B	X	A	A	A	B	B	A	X	B	X	B	B	B	B	X	A	A	B	A	A	A	B	B	B	A	A	A	B	B	B	X	A	A	X	A	B	A	B	B	B	A	B	A	B
AX-89538469	15	22.287	B	B	B	B	A	A	A	B	B	A	X	B	X	B	B	B	B	A	A	B	B	A	A	A	B	B	B	X	A	A	B	B	B	X	A	A	B	A	B	A	B	B	B	X	B	A	A
AX-111468671	15	24.855	A	B	B	B	A	A	A	B	B	A	X	B	X	A	B	A	B	X	A	B	B	A	A	A	B	A	X	A	A	A	B	A	B	X	A	A	B	A	X	A	B	A	B	X	B	A	A
AX-108886493	15	25.911	A	B	B	B	A	A	A	B	B	A	X	B	X	A	B	A	B	X	A	B	B	A	A	A	B	A	B	A	A	A	B	A	B	X	A	A	B	A	A	A	B	A	B	X	B	A	A
AX-89489968	15	27.382	A	B	B	B	A	A	A	B	B	A	X	B	X	B	B	A	B	X	A	B	B	A	A	A	B	A	B	A	A	A	B	X	B	X	A	A	B	A	A	A	B	A	B	X	B	A	A
AX-110085499	15	39.581	X	B	B	A	A	A	A	B	B	A	A	B	X	B	B	X	X	X	A	A	B	A	A	A	B	B	X	X	A	A	B	B	B	A	A	A	B	A	A	A	B	B	B	X	B	A	B
AX-110563403	15	41.362	X	B	B	X	A	A	B	B	B	A	A	B	X	B	B	X	A	X	A	A	B	A	A	A	X	B	X	X	A	A	B	B	A	X	A	A	B	A	A	A	B	B	B	B	B	B	B
AX-110513237	15	43.262	X	B	B	X	A	A	B	B	B	A	A	B	X	B	B	X	A	X	A	A	B	A	X	A	X	A	X	A	A	A	X	B	B	X	A	A	B	X	A	A	B	X	B	B	B	A	B
AX-108776047	15	43.729	X	B	B	A	A	A	B	B	B	A	A	B	X	B	B	B	A	X	A	A	B	A	A	A	X	A	X	A	A	A	B	B	B	X	X	A	B	X	A	A	B	A	B	B	B	A	B
AX-108773257	15	44.47	X	B	B	A	A	A	B	B	B	A	A	B	X	B	B	B	A	X	A	A	B	A	A	A	X	A	X	A	A	A	X	B	A	X	X	A	B	X	A	A	B	A	B	B	B	X	B
AX-110271557	15	45.669	X	B	B	A	A	A	B	B	B	A	A	B	X	B	B	X	A	X	A	A	B	A	A	A	X	A	B	A	A	A	X	B	A	X	X	A	B	X	A	A	B	A	X	B	B	A	B
AX-111260934	15	46.213	X	B	B	X	A	A	B	B	B	A	A	B	X	B	B	B	A	X	A	A	B	A	A	A	A	A	X	A	X	A	X	B	A	X	X	A	B	X	A	A	B	A	X	B	B	X	B
AX-109898339	15	46.353	X	B	B	A	A	A	B	B	B	A	A	B	X	B	B	X	A	X	A	A	B	A	A	A	X	A	B	A	A	A	B	B	A	X	X	A	B	X	A	A	B	A	X	X	B	A	B
AX-110581813	15	46.735	X	B	B	X	A	A	B	B	B	A	A	B	X	B	B	B	A	X	A	A	B	A	A	A	X	A	X	A	A	A	X	B	A	X	X	A	B	X	A	A	B	A	X	B	B	A	B
AX-110042698	15	47.312	X	B	B	X	A	A	B	B	B	A	A	B	X	B	B	X	A	A	A	A	B	A	A	A	X	B	X	A	A	A	X	B	A	X	X	A	B	X	B	A	B	A	X	B	B	A	B
AX-109739423	15	48.51	X	A	B	X	A	A	B	B	B	A	A	B	X	B	B	A	A	A	A	A	B	A	A	A	A	A	X	A	A	A	A	B	A	X	X	A	B	B	A	A	B	A	X	B	B	A	B
AX-110041896	15	48.813	X	A	B	X	A	A	B	B	B	A	A	B	X	B	B	A	A	A	A	A	B	A	A	A	A	A	X	A	A	A	A	B	A	X	X	A	B	X	A	A	B	A	X	B	B	B	B
AX-111589642	15	49.091	X	A	B	X	A	A	B	B	B	A	A	B	X	B	B	A	A	A	A	A	B	A	A	A	X	B	X	A	A	A	A	B	A	X	X	A	B	X	B	A	B	A	X	B	B	A	B
AX-108919131	15	49.744	X	A	B	X	X	A	B	B	B	A	A	B	X	B	B	A	A	A	A	A	B	A	A	A	A	A	X	A	A	A	A	B	A	X	X	A	B	X	A	A	B	A	X	A	B	B	B
AX-109380070	15	51.962	X	A	B	X	A	A	B	B	B	A	A	B	B	B	B	A	A	A	A	A	B	A	A	A	X	A	B	A	A	A	A	B	A	X	X	A	B	B	A	B	B	A	X	A	B	B	B
AX-89642798	15	52.828	X	A	B	X	X	A	B	B	B	A	A	B	X	B	B	A	A	A	A	A	B	A	A	A	X	A	B	A	A	A	A	B	A	B	X	A	B	B	A	B	B	A	X	A	B	B	B
AX-110036980	15	53.547	X	A	B	X	A	A	B	B	B	A	A	B	X	B	B	A	A	A	A	A	B	A	A	A	X	A	B	A	A	A	A	B	A	B	X	A	B	B	A	B	B	A	X	A	B	B	B
AX-111717376	15	54.088	X	A	B	X	X	A	B	B	B	A	A	B	A	B	B	A	A	B	A	A	B	A	A	A	X	A	B	X	A	A	A	B	A	B	X	A	B	B	A	B	B	A	X	A	B	B	B
AX-110036898	15	54.336	X	A	B	X	A	A	B	B	B	A	A	B	X	B	B	A	A	B	A	A	B	A	A	A	X	B	X	A	A	A	A	B	A	B	X	A	B	B	B	B	B	A	X	A	B	B	B
AX-109324087	15	55.275	X	A	B	A	X	A	B	B	B	A	A	B	A	B	B	A	A	B	A	A	B	A	B	A	X	A	X	X	A	A	A	B	A	B	X	A	B	B	A	B	B	A	X	A	B	X	B
AX-108877411	15	55.732	X	A	B	A	A	A	B	B	B	A	A	B	A	B	B	X	A	B	A	A	B	A	B	A	A	A	X	X	A	A	A	B	A	B	X	B	B	B	A	B	B	A	X	X	B	X	B
AX-108922889	15	56.158	X	A	B	A	A	A	B	B	B	A	A	B	A	B	B	A	A	B	X	A	B	A	B	A	X	A	B	X	A	A	A	B	A	B	X	B	B	B	A	B	B	A	X	X	B	X	B
AX-108878451	15	56.542	X	A	B	A	A	A	B	B	B	A	A	B	A	B	B	X	A	B	X	A	B	A	B	A	X	A	B	X	A	A	A	B	A	B	X	B	B	B	A	B	B	A	X	A	B	X	B
AX-109929775	15	61.261	X	A	B	A	B	A	B	B	B	A	B	B	X	B	A	B	A	B	A	A	B	A	B	A	X	A	X	X	A	A	A	B	A	B	X	B	B	B	A	B	B	A	B	A	B	B	B
AX-108827297	15	61.879	B	A	B	A	B	A	A	B	B	A	X	B	B	B	A	X	A	B	A	A	B	A	B	A	X	A	B	X	A	A	A	B	A	B	X	B	B	B	A	B	B	A	X	X	B	B	B
AX-110031634	15	63.901	X	A	B	A	B	A	A	B	B	A	B	B	B	B	A	X	A	B	X	A	B	A	B	A	X	A	B	X	A	A	A	B	A	B	X	B	B	B	A	B	B	A	B	A	B	B	B
AX-109447373	15	65.347	X	A	B	A	B	A	A	B	B	A	B	B	B	B	A	B	A	B	X	A	B	A	B	A	A	A	B	X	A	A	A	A	A	B	X	B	B	B	A	B	B	A	B	A	B	B	B
AX-111616614	15	77.636	X	A	X	A	A	B	A	X	A	A	B	B	B	B	A	A	A	B	X	A	B	B	A	B	X	A	B	A	A	X	A	A	A	A	B	A	B	B	A	B	A	A	B	X	B	X	B
AX-111902972	15	78.506	X	A	X	A	A	B	A	X	A	A	B	B	B	A	A	A	A	B	X	A	B	B	A	B	X	A	B	A	A	X	A	A	A	A	B	A	B	B	A	B	A	A	B	A	B	X	B
AX-110570350	15	82.733	B	A	X	A	A	B	A	X	A	A	B	B	B	A	A	A	A	B	B	A	A	B	B	B	X	A	B	A	A	X	A	A	A	A	B	A	B	B	A	B	A	A	B	A	B	X	B
AX-110186607	15	83.202	B	A	X	A	A	B	A	X	A	A	B	B	B	A	A	A	A	B	B	A	A	B	B	B	X	A	B	A	A	X	A	A	A	A	B	X	B	B	A	B	A	A	B	A	B	X	B
AX-109968486	15	88.597	B	A	X	A	A	B	A	X	A	A	B	B	B	A	A	X	A	B	B	A	A	B	B	B	X	A	B	A	A	X	A	A	A	A	B	B	B	B	A	B	A	B	B	X	B	X	B
AX-108930866	15	89.817	B	A	X	A	A	B	A	X	A	A	B	B	B	A	A	B	A	X	B	A	A	B	B	B	X	A	B	A	A	X	A	A	A	A	B	B	B	B	A	B	A	B	B	X	B	A	B
AX-110391491	15	96.489	B	A	X	A	A	B	A	X	B	A	B	B	A	A	A	X	X	B	B	A	A	B	B	B	X	A	X	A	A	A	A	A	A	A	B	B	B	B	A	B	A	B	B	A	B	X	B
AX-89331886	15	98.963	B	A	A	A	A	B	A	X	B	A	A	B	A	A	A	X	B	B	B	A	X	B	B	B	X	A	X	A	A	A	A	A	A	A	B	B	B	B	A	B	A	B	B	A	B	A	B
AX-110338433	15	99.572	B	A	A	A	A	B	A	X	B	A	A	B	A	A	A	X	B	B	B	A	X	B	B	B	A	B	A	A	A	A	A	A	A	A	B	B	B	B	B	B	A	B	B	X	B	A	B
AX-110948273	15	100.231	B	A	A	A	A	B	A	X	B	A	A	B	A	A	A	X	B	B	B	A	X	B	B	B	A	B	A	A	A	A	A	A	A	A	B	B	B	X	B	B	A	B	B	X	B	X	B
AX-109847169	15	102.393	A	B	A	A	B	A	A	X	B	A	X	B	X	B	B	X	B	X	B	A	X	B	A	A	B	X	X	X	X	A	B	A	B	B	B	B	A	X	B	X	A	A	X	A	X	B	A
AX-111146706	15	102.798	B	A	A	A	A	B	A	A	B	A	A	X	B	A	A	X	B	B	B	A	A	B	B	B	X	A	A	A	A	A	A	A	A	A	B	B	B	B	A	B	A	B	B	X	B	X	B
AX-108974123	15	103.698	B	A	A	A	A	B	A	A	B	A	A	B	B	A	A	X	B	X	B	A	A	B	B	A	X	A	A	X	A	A	A	A	A	A	B	B	B	B	A	B	A	B	B	X	B	B	B
AX-108883591	15	104.81	B	B	A	A	B	A	A	X	A	A	X	X	X	B	B	X	B	X	B	A	X	B	A	A	B	X	X	X	B	A	B	A	B	A	B	B	A	B	B	B	A	A	X	A	B	B	A
AX-94916071	15	105.022	B	A	A	A	A	X	A	A	B	B	A	B	B	A	A	X	B	A	A	A	A	B	B	B	A	B	A	A	A	A	A	A	A	A	B	B	B	B	B	B	A	B	B	A	B	B	B
AX-109582768	15	107.225	B	A	A	X	A	B	A	A	B	B	A	B	B	A	A	B	A	B	X	A	X	B	B	B	A	A	X	X	A	A	A	A	B	A	B	B	B	B	A	B	A	B	B	A	B	B	B
AX-108906106	15	108.104	B	A	A	X	A	B	A	A	B	B	A	B	B	A	A	B	A	B	X	A	X	B	B	B	X	A	X	X	A	A	A	A	B	A	B	B	B	B	A	B	A	B	B	X	B	B	B
AX-111019979	15	108.506	B	A	A	X	A	B	A	A	B	B	A	B	B	A	A	B	A	B	X	A	X	B	B	B	X	A	X	X	A	A	A	A	B	A	B	B	B	B	A	B	A	B	B	X	B	B	B
AX-111055722	15	110.434	B	A	A	X	A	B	A	A	B	B	B	B	B	A	A	B	A	B	X	A	B	B	X	B	X	A	X	X	A	A	A	A	X	X	B	B	B	B	A	A	A	B	B	X	B	B	B
AX-109195695	15	111.807	B	A	A	X	A	B	A	A	B	B	B	B	B	A	A	B	A	B	X	A	B	B	X	B	B	A	A	X	A	A	A	A	B	A	B	B	B	B	A	B	A	B	B	X	B	B	B
AX-110578278	15	113.05	B	A	A	X	A	B	A	A	B	B	B	B	B	A	B	B	A	B	X	A	B	B	X	B	B	A	A	X	A	A	A	A	B	A	B	B	B	B	A	B	A	B	B	X	B	B	B
AX-110602003	15	114.629	B	A	A	X	A	B	A	A	B	B	B	B	B	A	B	B	A	X	A	A	B	B	X	B	X	B	A	X	A	A	A	B	B	A	B	X	B	B	B	B	A	B	B	X	B	B	B
AX-109855976	15	116.304	B	A	A	X	B	B	A	A	B	B	B	B	B	A	B	B	A	X	B	A	B	B	X	B	X	B	A	X	A	A	A	B	B	A	B	B	A	B	B	B	A	B	X	X	B	A	B
AX-110586161	15	126.617	B	A	A	A	B	A	A	A	B	B	X	B	X	A	B	A	A	A	B	A	B	B	X	B	A	A	A	B	A	A	A	A	B	A	B	A	A	X	A	X	X	B	B	B	X	B	A
AX-109809706	15	128.482	B	A	A	A	B	A	A	A	B	B	X	B	B	A	B	A	A	A	B	A	X	B	X	B	A	B	A	B	B	A	B	X	A	A	B	A	A	B	B	B	B	B	B	X	B	B	A
AX-111457323	15	129.188	B	A	A	A	B	A	A	A	B	B	B	B	B	A	B	A	X	A	B	A	X	B	X	B	A	A	A	B	B	A	B	A	A	A	B	A	A	B	A	B	B	B	B	X	X	B	A
AX-110625313	15	130.893	B	A	A	X	B	A	A	A	B	B	B	B	B	A	B	B	A	A	B	A	X	B	X	B	A	A	A	B	B	A	B	A	A	A	B	A	A	B	A	B	B	B	B	A	X	B	B
AX-110930051	15	132.636	B	A	A	A	B	A	A	A	B	B	B	B	B	A	B	B	X	A	B	A	X	B	X	B	A	A	A	B	B	A	B	A	A	A	B	A	A	B	A	B	B	B	B	X	A	B	B
AX-111512534	15	145.78	B	A	A	A	B	A	A	A	B	B	B	A	B	A	B	B	X	A	A	A	X	B	X	A	A	A	X	B	B	A	B	A	B	B	A	A	A	A	A	A	B	B	B	X	A	A	B
AX-109327109	15	147.628	A	A	A	A	B	A	A	A	B	B	X	A	B	A	B	A	X	A	A	A	B	B	A	A	A	A	B	B	X	A	B	A	X	X	A	A	A	A	A	A	B	B	B	X	B	A	X
AX-109464956	15	152.186	X	A	A	A	B	A	A	A	B	B	X	A	B	A	B	A	X	A	A	A	B	A	X	A	A	A	X	B	X	A	B	A	B	X	A	A	A	A	A	A	A	B	B	X	B	A	X
AX-89451602	15	154.964	A	A	A	A	B	A	A	A	A	B	B	A	B	A	B	A	X	A	A	A	B	A	X	A	A	A	X	B	X	A	B	A	B	B	A	A	A	A	A	A	A	B	B	X	B	A	X
AX-89753391	15	156.505	X	A	A	A	B	A	A	A	A	B	X	A	B	A	B	B	X	A	A	A	X	A	B	A	A	A	B	B	X	A	B	A	B	X	A	A	A	A	A	A	A	B	B	A	B	A	B
AX-108822269	15	156.971	B	A	A	A	B	A	A	A	A	B	B	A	B	A	B	B	X	A	A	A	X	A	B	A	A	A	B	B	X	A	B	A	B	B	A	A	A	A	X	A	A	B	B	A	A	A	B
AX-89598303	16	0	B	A	X	A	B	B	A	A	A	B	A	A	B	A	A	A	A	B	B	B	B	B	A	B	A	A	A	A	A	X	B	A	A	B	A	A	A	A	A	A	A	A	B	B	B	B	A
AX-109843320	16	0.43	B	A	X	A	B	B	A	A	A	B	A	A	B	A	A	A	A	B	B	B	B	B	A	B	A	A	B	A	A	X	B	A	A	B	A	A	A	A	A	A	A	A	B	B	B	B	A
AX-108753204	16	1.162	X	A	X	A	B	B	A	A	A	B	A	A	B	A	A	A	A	B	B	B	B	B	A	B	A	A	B	A	A	X	B	A	A	X	A	A	A	A	A	A	B	A	B	B	B	X	A
AX-110673745	16	1.529	B	A	X	X	B	B	A	A	A	B	A	A	B	A	A	X	A	B	B	B	B	B	A	B	A	A	B	A	A	B	B	A	A	B	A	A	A	A	A	A	B	A	B	B	B	X	A
AX-108767859	16	2.402	X	A	X	X	B	B	A	A	A	X	A	A	B	A	A	B	A	B	B	B	B	B	A	B	A	A	B	A	A	B	B	B	A	B	A	A	A	A	A	A	B	A	B	B	B	B	A
AX-111529259	16	3.029	X	A	X	X	B	B	A	A	A	X	A	A	B	A	A	B	A	B	B	B	B	B	A	B	A	B	B	A	A	B	X	X	A	X	A	A	A	A	A	A	B	A	B	B	B	X	A
AX-110689765	16	3.301	X	A	X	B	B	B	A	A	A	X	A	X	B	X	X	B	A	X	B	B	B	B	A	B	A	B	B	A	X	B	B	B	A	X	A	A	A	A	A	A	B	A	B	B	B	X	A
AX-111155964	16	4.059	B	A	X	B	B	B	A	A	A	X	A	A	B	A	A	B	A	X	B	B	B	B	A	B	A	B	B	A	B	B	B	B	A	B	A	A	A	A	A	A	B	A	B	B	B	B	A
AX-109333155	16	4.747	X	A	X	B	B	B	A	A	A	A	A	A	X	A	A	X	A	X	B	B	B	B	A	B	A	B	B	A	X	B	X	B	A	X	A	A	A	A	A	A	B	A	B	B	B	X	A
AX-109899135	16	7.263	X	A	X	B	A	B	A	B	A	A	A	A	X	A	A	B	A	X	B	B	B	B	A	B	A	B	B	A	A	B	X	X	A	X	A	A	A	A	A	A	B	A	B	B	B	A	A
AX-89722545	16	7.618	B	A	X	B	A	B	A	B	A	X	A	A	B	A	A	B	A	X	B	B	B	B	A	B	A	B	B	A	X	B	B	X	A	B	A	A	A	A	A	A	B	A	B	B	B	A	B
AX-111652496	16	8.341	X	A	A	B	A	B	A	B	A	A	A	A	X	A	A	B	A	A	B	B	B	B	A	B	A	B	B	A	A	B	X	B	A	X	A	A	A	A	A	A	B	A	B	B	B	A	B
AX-109401597	16	8.7	B	A	X	B	A	B	A	B	A	X	A	A	B	A	A	B	A	X	B	B	B	B	A	B	A	B	B	A	A	B	B	B	A	B	A	A	A	A	A	A	B	A	B	B	B	A	B
AX-109321129	16	9.682	B	A	X	X	A	B	A	B	A	X	A	A	B	A	A	A	A	X	B	B	B	B	A	B	A	B	B	A	A	B	B	A	A	B	A	A	A	A	A	A	B	A	B	B	B	A	B
AX-110924990	16	12.736	B	A	X	X	A	B	A	B	A	X	A	A	B	A	A	X	A	X	B	B	B	B	A	B	A	B	B	A	A	B	B	A	A	A	A	A	A	B	A	B	B	A	B	B	B	A	B
AX-110528642	16	15.582	B	B	B	A	A	B	A	A	A	B	A	A	B	A	A	A	A	A	B	A	B	A	A	B	A	B	A	X	A	A	B	A	A	B	X	A	A	A	A	A	B	A	B	X	B	A	A
AX-109420246	16	16.109	X	B	B	A	A	B	A	A	A	B	A	A	B	A	A	A	A	A	B	A	B	A	A	B	A	B	A	A	A	A	B	A	A	B	A	A	A	A	A	A	B	A	B	B	B	A	A
AX-110974091	16	22.307	B	B	B	A	A	B	B	A	A	B	A	A	B	A	A	B	A	A	B	A	B	A	A	B	B	B	A	A	A	A	B	B	A	X	X	A	A	A	B	A	B	A	B	B	B	A	A
AX-109837131	16	23.092	B	B	B	A	A	X	B	A	A	X	A	A	B	A	A	B	A	A	B	A	B	A	A	B	B	B	A	A	A	A	B	B	A	X	A	A	A	A	B	A	B	A	B	B	B	A	A
AX-108804757	16	24.279	X	B	B	A	A	A	B	A	A	X	A	A	B	A	A	B	A	A	B	A	B	A	A	B	B	B	A	A	A	A	B	B	A	X	A	A	A	A	B	A	B	A	B	B	B	A	A
AX-109275308	16	24.648	B	A	A	B	A	B	A	B	A	X	A	B	B	A	A	X	A	X	B	B	X	B	A	B	A	B	B	B	A	B	A	B	A	A	A	A	A	B	A	B	B	X	B	B	B	A	B
AX-110497820	16	26.835	X	A	A	B	A	B	A	B	A	X	A	B	B	A	A	X	A	X	B	B	X	B	X	B	A	B	B	B	A	B	A	B	A	A	A	A	A	B	A	B	B	B	B	B	A	B	B
AX-108974039	16	27.428	X	B	B	A	A	X	B	A	A	B	A	A	B	B	A	A	A	A	B	A	B	A	A	B	B	B	A	A	A	A	B	A	A	B	A	A	A	A	A	A	B	A	B	B	B	A	A
AX-109476060	16	28.748	X	B	B	X	A	X	B	A	A	X	A	B	B	B	A	A	A	A	B	A	B	A	A	B	B	B	A	A	A	A	B	A	A	X	B	A	A	A	A	A	B	A	B	B	B	A	A
AX-108834300	16	29.535	X	A	A	B	A	B	A	B	A	X	A	B	B	A	A	A	A	X	B	B	A	B	X	B	A	A	B	B	A	B	A	A	A	A	A	A	A	B	A	B	B	B	B	B	A	B	B
AX-110365364	16	29.889	X	B	B	B	A	X	B	A	A	B	A	B	B	B	A	B	A	A	B	A	B	A	A	B	B	B	A	A	A	A	B	A	A	B	B	A	A	A	B	A	B	X	B	B	B	A	A
AX-108742513	16	31.582	X	B	B	B	A	X	B	A	A	B	A	B	B	B	A	B	A	A	B	A	B	A	A	B	B	B	A	A	A	A	B	A	A	B	B	A	A	B	B	B	B	A	B	B	B	A	A
AX-111640411	16	36.565	X	B	B	X	A	B	B	A	A	B	A	B	B	B	A	X	B	A	B	A	B	A	A	B	B	B	A	A	A	A	B	A	A	X	B	A	A	B	X	B	B	A	B	B	B	A	A
AX-111164792	16	40.039	X	B	B	X	A	B	B	A	A	X	A	B	B	B	A	A	B	A	B	A	B	B	A	B	B	B	A	A	A	A	B	A	A	X	A	A	A	B	A	B	B	A	B	B	B	A	A
AX-110925472	16	40.292	B	B	B	X	A	B	B	A	A	B	A	B	B	B	A	A	B	A	B	A	B	B	A	B	A	B	A	A	A	A	B	A	A	B	A	A	A	B	A	B	B	A	B	B	B	A	A
AX-109882077	16	42.295	X	B	B	X	A	B	B	A	A	X	A	B	B	B	A	B	B	A	B	A	B	B	A	B	A	B	A	A	A	A	B	A	A	B	A	A	A	B	B	B	B	A	B	B	B	A	A
AX-111025495	16	45.882	X	B	B	A	A	B	A	A	A	A	A	B	X	B	A	B	B	A	B	A	B	B	A	B	A	B	A	X	A	A	B	A	X	B	X	A	A	B	B	B	B	A	B	B	B	A	A
AX-111504079	16	46.012	X	B	B	A	A	B	A	A	A	A	A	B	B	B	A	B	B	A	B	A	B	B	A	B	A	B	A	X	A	A	B	A	A	B	A	A	A	B	B	B	B	A	B	B	B	A	A
AX-110032367	16	48.181	A	B	B	B	A	B	A	A	A	A	A	B	B	B	A	B	B	A	B	A	B	B	A	B	A	B	A	X	A	A	B	A	A	B	A	A	A	B	B	B	B	A	B	X	B	A	A
AX-108742134	16	48.751	A	B	B	A	A	B	A	A	A	A	A	B	B	B	A	B	B	A	B	A	B	B	A	B	A	B	A	X	A	A	B	A	A	B	A	A	A	B	B	B	B	A	B	B	B	A	A
AX-109974361	16	48.957	A	B	B	A	A	B	A	A	A	A	A	B	B	B	A	B	B	A	B	A	B	B	A	B	A	B	A	X	A	A	B	A	A	X	A	A	A	B	B	B	B	A	B	X	B	A	A
AX-108939533	16	49.284	A	B	B	A	A	B	A	A	A	A	A	B	B	B	A	B	B	A	B	A	B	B	A	B	A	B	A	X	A	A	B	B	A	B	A	A	A	B	B	B	B	A	B	B	B	A	A
AX-111043436	16	50.148	A	B	B	A	A	B	A	A	A	A	A	B	B	B	A	A	B	A	B	A	B	B	A	B	A	B	A	X	A	A	B	A	A	B	A	A	A	B	B	B	B	A	B	B	B	A	A
AX-108834663	16	53.242	A	A	B	A	A	B	A	A	A	A	A	B	B	B	A	B	B	A	B	A	B	B	X	B	A	B	A	A	A	A	A	B	A	X	A	A	A	B	B	B	B	A	B	B	B	A	A
AX-110398381	16	54.263	A	A	B	A	A	B	A	A	A	A	B	B	B	B	A	B	B	A	B	A	B	B	X	B	A	B	A	A	A	A	A	A	A	X	A	A	A	B	B	B	B	A	B	X	B	A	A
AX-110414920	16	54.41	X	A	B	A	A	B	A	A	A	A	B	B	B	B	A	A	B	A	B	A	B	B	X	B	A	B	A	X	A	A	X	A	A	X	A	A	A	B	B	B	B	A	B	B	B	A	A
AX-110503798	16	55.341	B	X	B	A	A	B	A	A	A	A	B	B	B	B	A	A	B	A	B	A	B	B	B	B	A	B	A	X	A	A	X	B	A	X	A	A	A	B	B	B	B	A	B	B	X	A	A
AX-111520041	16	56.012	B	A	B	A	A	B	A	A	A	A	B	B	B	B	A	B	B	A	B	A	B	B	X	B	A	B	A	X	A	A	A	B	A	X	A	A	A	B	B	B	B	A	B	B	B	A	A
AX-111492224	16	56.717	X	A	B	A	A	B	A	A	A	A	B	B	B	B	A	X	B	A	B	A	B	B	B	B	A	B	A	X	A	X	A	A	A	B	A	B	A	B	B	B	B	A	B	X	B	A	A
AX-108813367	16	58.535	X	A	B	A	A	B	A	A	A	A	B	B	B	B	A	A	B	A	B	A	B	B	A	B	A	B	A	A	A	X	X	A	A	B	A	B	A	B	B	B	B	A	B	B	B	A	A
AX-109842268	16	59.132	X	A	B	A	A	B	A	A	A	A	B	B	B	B	A	B	B	A	B	A	B	B	A	B	A	B	A	A	A	X	X	A	A	B	A	B	A	B	B	B	B	A	B	B	B	A	A
AX-110992859	16	60.673	B	A	B	A	A	B	A	A	A	A	B	B	B	B	A	A	B	A	B	A	B	B	A	B	B	B	A	A	A	X	X	A	A	B	A	A	A	B	B	B	B	A	B	B	B	A	A
AX-108736509	16	61.14	X	A	B	A	A	B	A	A	A	A	X	B	B	B	A	A	B	A	B	A	B	B	A	B	B	B	A	A	A	A	A	A	A	B	A	A	A	B	B	B	B	A	B	X	B	A	A
AX-108868726	16	62.938	B	A	B	A	A	B	A	A	A	A	B	B	B	B	A	B	B	A	B	A	B	B	A	B	B	B	A	A	A	X	A	A	A	B	A	A	A	B	B	B	B	A	B	B	B	A	A
AX-110056145	16	63.667	B	A	B	A	A	X	A	A	A	A	B	B	B	B	A	B	B	A	B	A	B	B	A	B	B	B	A	A	A	X	X	B	A	B	A	A	B	B	B	B	B	A	B	B	B	A	A
AX-111588952	16	64.748	X	A	B	A	A	B	A	A	A	A	B	B	B	B	A	B	B	A	B	A	B	B	A	B	B	B	A	A	A	X	A	B	A	B	A	A	B	B	B	B	B	A	B	B	B	B	A
AX-108915446	16	66.061	X	A	B	A	A	B	A	A	A	A	B	B	B	B	A	B	B	A	B	A	B	B	A	B	B	B	A	A	A	X	A	B	X	B	A	A	B	B	B	B	B	A	B	B	B	B	A
AX-111128769	16	66.648	X	A	B	A	A	B	A	A	A	A	B	B	B	B	A	B	B	A	B	A	B	B	A	B	B	B	A	X	A	X	A	B	A	B	A	A	B	B	B	B	B	A	B	B	B	B	A
AX-111019702	16	67.311	X	A	B	A	A	B	A	A	A	A	B	B	B	B	A	B	B	A	B	A	B	B	A	B	B	B	A	X	A	X	A	A	X	B	A	A	B	B	B	B	B	A	B	B	B	B	A
AX-109291122	16	67.945	X	A	B	A	A	B	A	A	A	A	B	B	B	B	A	A	B	A	B	A	B	B	A	B	B	B	A	B	A	X	A	A	A	B	A	A	B	B	B	B	B	A	B	B	B	B	A
AX-110397515	16	68.75	A	A	B	A	A	B	A	A	A	A	B	B	B	B	A	B	B	A	B	A	B	B	A	B	B	B	A	B	A	X	A	A	A	B	A	A	B	B	B	B	B	A	B	B	B	B	A
AX-110928492	16	70.856	X	A	B	A	A	B	A	A	A	A	B	B	B	B	A	B	X	A	B	A	B	B	A	B	B	B	A	X	A	X	A	A	X	B	A	X	B	B	B	B	B	A	B	X	B	B	A
AX-108825127	16	77.292	X	A	B	X	A	B	A	A	B	A	B	B	A	A	A	B	X	A	B	A	B	A	A	B	B	B	A	X	B	X	A	B	A	B	A	B	B	X	B	B	B	A	A	B	B	B	A
AX-110926984	16	77.846	X	B	B	A	A	B	A	A	B	A	B	B	A	A	A	B	B	A	B	A	B	A	A	B	B	B	A	X	B	X	A	B	X	B	A	B	B	B	B	B	B	A	A	B	B	B	A
AX-111507791	16	78.565	X	B	B	A	A	B	A	A	B	A	B	B	A	A	A	B	X	A	B	A	B	A	A	B	B	B	A	X	B	X	A	B	A	B	A	B	B	X	B	B	B	A	A	B	B	B	A
AX-110970369	16	78.966	X	B	B	A	A	B	A	A	B	A	B	B	A	A	A	B	X	A	B	A	B	A	A	B	A	B	A	A	B	X	A	B	A	B	A	B	B	B	B	B	B	A	A	B	B	B	A
AX-108964277	16	79.181	X	B	B	A	A	B	A	A	B	A	B	B	A	A	A	B	B	A	B	A	B	A	A	B	B	B	A	A	B	X	A	B	A	B	A	B	B	B	B	B	B	A	A	B	B	B	A
AX-111079727	16	79.68	X	B	B	A	A	B	A	A	B	A	B	B	A	A	A	X	X	A	B	A	B	A	A	B	A	B	A	A	B	X	A	B	X	B	A	B	B	B	B	B	B	A	A	B	B	B	A
AX-110055643	16	80.688	X	B	B	A	A	B	A	A	B	A	B	B	A	A	A	B	B	A	B	A	B	A	X	B	A	B	A	A	B	X	A	B	X	B	A	B	B	A	B	A	B	A	A	B	B	B	A
AX-109295804	16	81.903	X	B	B	A	A	B	A	A	B	A	B	B	A	A	A	B	X	A	B	A	B	A	A	B	A	B	A	A	B	X	A	B	X	B	A	B	B	A	B	A	X	A	A	X	B	B	A
AX-109965491	16	82.798	X	B	B	A	A	B	A	A	B	A	B	B	A	A	A	A	X	A	B	A	B	A	A	B	A	B	A	A	B	X	A	B	A	B	A	B	B	A	B	A	X	A	A	X	B	B	A
AX-111585865	16	83.45	X	B	B	A	A	B	A	A	B	A	B	B	A	A	A	A	X	A	B	A	B	A	A	B	A	B	A	A	B	X	A	B	A	B	A	B	B	A	B	A	X	A	A	X	B	B	A
AX-109370898	16	84.665	X	B	B	X	A	B	A	A	B	A	B	B	A	A	A	B	X	A	B	A	B	A	A	B	A	A	A	A	A	A	A	B	A	B	A	B	B	A	B	A	X	A	A	X	B	A	A
AX-109837110	16	88.268	X	B	B	X	A	B	A	X	B	A	B	B	A	X	A	B	X	A	B	A	B	A	A	B	A	X	A	A	A	A	A	B	B	B	A	B	B	A	B	A	B	A	A	X	B	A	A
AX-111665420	16	89.539	X	B	B	A	A	B	A	X	B	A	B	B	B	X	A	B	X	A	B	A	B	A	A	B	A	A	A	A	A	A	A	B	B	B	A	B	B	A	B	A	B	A	A	X	B	A	A
AX-110600929	16	90.457	X	B	B	A	A	B	A	X	B	A	B	B	B	B	A	X	A	A	B	A	B	A	A	B	A	A	A	A	A	A	A	B	B	B	A	B	B	A	B	A	B	A	A	X	B	A	A
AX-111590860	16	100.065	X	B	B	A	A	A	X	X	B	A	A	B	B	X	A	B	A	A	B	A	A	A	A	B	X	A	X	B	A	A	A	B	B	B	A	B	B	A	B	A	X	A	B	X	B	B	A
AX-108778013	16	101.642	X	B	B	A	A	A	B	X	B	A	A	B	B	B	A	X	X	A	B	A	A	A	A	B	B	A	B	B	A	A	A	B	B	B	A	B	B	A	B	A	B	A	B	A	B	B	A
AX-109860639	16	102.012	X	A	B	A	A	A	B	X	B	A	A	B	B	B	A	X	X	A	B	A	A	A	A	B	B	A	B	B	A	A	A	B	B	B	A	B	B	A	B	A	B	A	B	A	B	B	A
AX-111639623	16	102.887	B	A	B	A	A	A	B	B	B	A	A	B	B	B	A	X	X	A	B	A	A	A	A	B	B	A	B	B	A	A	A	B	B	B	A	B	B	A	B	A	B	A	X	X	B	B	A
AX-110003081	16	104.202	A	A	B	A	A	A	B	B	B	A	A	B	B	B	A	X	X	A	B	A	A	A	A	B	B	A	X	X	A	A	A	B	B	A	A	B	B	A	B	A	B	A	X	A	B	B	A
AX-109921374	16	104.559	A	A	B	A	A	A	B	B	B	A	A	B	B	B	A	X	X	A	B	A	A	A	A	B	B	A	X	X	A	A	A	B	B	A	A	B	B	A	B	A	B	A	X	X	B	B	A
AX-110101588	16	105.794	A	A	B	A	A	A	B	B	B	A	A	B	B	X	A	X	A	A	B	A	A	A	A	X	B	A	X	B	A	A	A	B	B	A	A	B	B	A	B	A	B	A	A	X	B	A	A
AX-110589025	16	107.185	A	A	B	A	A	A	B	B	B	A	A	B	B	X	A	A	B	A	B	A	A	A	A	A	B	A	X	B	A	A	A	B	B	A	A	B	B	A	B	A	B	A	X	X	B	A	A
AX-109398771	16	108.253	X	A	X	A	A	A	B	B	B	A	A	B	B	B	A	X	B	A	B	A	A	A	A	A	B	X	X	B	A	A	A	B	B	A	B	B	B	A	X	A	B	A	X	X	B	A	A
AX-109902225	16	108.796	A	A	X	A	A	A	B	B	B	A	A	B	B	B	A	X	B	A	B	A	A	A	A	A	B	X	X	B	A	A	A	B	B	A	B	B	B	A	B	A	B	A	X	X	B	A	A
AX-108769468	16	110.886	A	A	B	A	A	A	B	B	B	A	A	B	B	B	A	A	B	A	B	A	A	A	A	A	B	B	B	B	A	A	A	B	B	X	B	B	B	A	B	A	B	A	A	X	B	A	A
AX-89583444	16	117.039	A	A	X	A	B	A	B	B	B	A	A	B	B	X	A	A	B	A	B	B	A	A	A	A	B	B	B	B	A	A	A	A	B	A	B	B	B	B	B	X	B	A	A	B	B	A	A
AX-109478902	16	117.799	A	A	X	A	B	A	B	B	B	A	A	B	B	B	A	A	B	A	B	B	A	A	X	A	B	X	X	B	A	A	A	A	B	X	B	B	B	B	B	A	B	A	A	B	B	A	A
AX-111669569	16	119.869	A	B	X	A	B	A	B	B	B	A	A	B	B	X	A	A	X	A	B	B	A	A	A	A	B	X	A	B	A	X	A	A	B	A	B	B	B	B	B	A	X	A	A	X	B	A	A
AX-111071002	16	122.996	A	B	X	A	B	A	B	B	B	A	A	B	B	X	A	A	X	X	B	B	A	A	A	A	B	X	A	B	A	X	A	A	B	A	B	B	B	B	B	A	B	A	A	B	B	A	A
AX-109597215	17	0	B	A	A	B	A	A	B	A	A	B	A	B	B	A	B	A	A	B	B	B	B	A	B	A	B	A	A	A	X	B	A	B	B	X	A	B	X	A	A	A	A	B	B	A	B	B	A
AX-111038900	17	1.11	B	A	A	X	A	A	B	A	A	B	A	B	B	A	B	X	A	B	B	B	B	A	B	A	B	B	A	A	X	B	A	B	B	X	A	B	X	A	A	A	A	B	B	A	B	B	A
AX-111384052	17	6.643	B	A	A	B	B	A	B	A	A	B	B	B	B	A	B	X	A	B	B	B	B	A	B	A	B	A	A	A	X	B	A	B	B	A	A	B	X	A	A	A	A	B	X	A	B	B	A
AX-110979021	17	19.647	B	A	A	B	A	A	B	A	B	B	A	A	B	B	B	B	A	B	B	B	B	A	B	A	B	A	B	X	A	B	B	B	B	X	B	B	A	A	B	A	A	B	X	B	B	B	A
AX-110059009	17	20.203	B	A	A	B	A	A	B	A	B	X	A	A	B	B	B	B	A	B	B	B	B	A	B	A	B	B	B	X	A	B	B	B	B	X	B	B	A	A	B	X	A	B	X	X	B	B	A
AX-109439077	17	22.336	B	B	A	B	A	A	B	A	X	B	A	A	B	B	B	X	A	X	B	B	B	A	B	A	B	A	B	A	A	B	B	B	B	X	B	B	A	A	B	A	A	B	X	X	B	B	A
AX-109284096	17	23.231	B	B	A	B	A	A	B	A	B	B	A	A	B	B	B	B	A	X	B	B	B	A	B	A	B	B	B	X	A	B	B	B	B	X	B	B	A	A	B	A	X	B	X	X	B	B	A
AX-111106671	17	27.463	A	B	A	X	A	A	B	A	X	A	A	A	B	B	B	X	A	A	B	B	B	A	B	A	B	A	B	A	A	B	B	B	B	A	B	A	X	A	B	A	A	B	X	A	B	B	A
AX-109861055	17	28.895	A	B	A	X	A	A	B	A	X	A	A	A	B	B	B	X	A	X	B	B	B	A	B	A	B	A	X	X	A	B	B	B	B	A	B	A	X	A	B	A	X	B	X	X	B	B	A
AX-109931880	17	29.48	A	B	A	B	A	A	B	A	X	A	A	A	B	B	B	X	A	X	B	B	B	A	B	A	B	A	A	A	A	B	B	B	B	A	B	A	X	A	B	A	X	B	X	A	B	B	A
AX-109937061	17	30.237	A	B	A	B	A	A	B	X	X	A	A	A	B	B	B	B	A	X	B	B	B	A	B	A	B	A	A	A	A	B	B	B	B	A	B	A	A	A	B	A	X	B	X	X	B	B	A
AX-110498020	17	30.457	A	B	A	B	A	A	B	A	X	A	A	A	B	B	B	X	A	X	B	B	B	A	B	A	B	B	A	A	A	B	B	B	B	A	B	A	X	A	B	A	X	B	X	A	B	B	A
AX-110607926	17	31.137	A	B	A	B	A	A	B	A	X	A	A	A	B	B	B	B	A	X	B	B	B	A	B	A	A	A	A	A	A	B	B	B	B	A	B	A	A	A	B	A	X	X	X	A	B	B	A
AX-110530579	17	32.374	X	B	A	X	A	A	B	A	X	A	A	A	B	B	B	A	A	X	B	B	B	A	B	A	A	A	A	A	A	B	B	B	B	A	B	A	A	A	B	A	X	X	X	A	B	B	A
AX-111050096	17	34.232	A	B	A	A	A	A	B	A	A	A	A	A	B	B	B	A	A	A	B	B	B	X	B	A	A	B	A	A	A	B	B	B	B	A	B	A	A	A	B	A	B	A	A	A	B	B	A
AX-110560398	17	34.405	A	B	A	A	A	A	B	A	X	A	A	A	B	B	B	A	A	X	B	B	B	X	B	A	A	B	A	A	A	B	B	B	B	X	B	A	A	A	B	A	B	X	A	A	B	B	A
AX-109885720	17	35.533	A	B	A	A	A	A	B	A	B	A	A	A	X	B	B	A	A	X	B	X	B	A	B	A	A	A	A	X	A	B	B	B	B	A	B	A	A	A	B	A	B	X	A	X	X	A	A
AX-108803651	17	36.02	A	B	A	X	A	X	B	A	X	A	A	A	B	B	B	X	A	X	B	B	B	X	B	A	A	A	A	A	A	B	B	B	B	X	B	A	A	A	B	A	B	X	A	A	B	B	A
AX-89344223	17	36.552	A	B	A	X	A	A	B	A	X	A	A	A	B	B	B	B	A	X	B	B	B	X	B	A	A	A	A	A	A	B	B	B	B	X	B	A	A	A	B	A	B	X	A	A	B	B	A
AX-110368287	17	38.84	A	B	A	A	A	A	B	A	A	A	A	A	A	B	B	X	A	X	B	B	B	X	B	A	A	A	A	A	A	B	B	B	B	X	B	A	A	A	B	A	B	X	A	A	B	B	A
AX-108883873	17	45.321	A	A	A	A	A	A	B	A	B	A	A	A	A	B	B	X	A	A	B	X	B	B	A	A	A	A	A	B	A	B	B	B	B	X	B	A	A	A	A	A	B	X	A	A	B	B	A
AX-110017675	17	45.94	A	A	A	A	A	A	B	A	B	A	X	B	A	B	B	X	A	A	A	X	B	B	A	A	A	A	A	B	A	B	B	B	B	X	B	A	A	A	A	A	B	X	A	A	B	B	A
AX-111663688	17	46.682	A	A	A	A	A	A	B	A	B	A	X	B	A	B	B	X	A	A	A	X	B	B	A	A	A	A	A	B	A	B	B	B	B	X	B	A	A	A	A	X	B	X	A	A	B	B	A
AX-111622512	17	47.239	A	A	A	A	A	A	B	A	B	A	B	B	A	B	B	B	A	A	A	X	B	B	A	A	A	B	A	B	A	B	B	B	B	X	B	A	A	A	A	A	B	X	A	A	B	B	A
AX-109421706	17	47.618	A	A	A	A	A	A	B	A	B	A	B	B	A	B	B	B	A	A	A	X	B	B	A	A	A	A	A	B	A	B	B	B	B	X	B	A	A	A	A	A	B	X	A	A	B	B	A
AX-108762758	17	48.108	A	A	A	A	A	A	B	A	B	A	B	B	A	B	B	B	A	A	A	X	B	B	A	A	A	B	A	B	A	X	B	B	B	X	B	A	A	A	A	A	B	X	A	A	B	B	A
AX-109408478	17	48.268	A	A	A	A	A	A	B	A	B	A	B	B	A	B	B	X	A	A	A	X	B	B	A	A	A	A	A	B	A	B	B	B	B	X	B	A	A	A	A	A	B	X	A	A	B	B	A
AX-109337725	17	48.875	A	A	A	A	A	X	B	A	B	A	B	B	A	B	B	B	A	A	A	X	B	B	A	A	A	A	A	B	A	B	B	B	B	X	B	A	A	A	A	A	B	B	A	A	B	B	A
AX-109362357	17	49.515	A	A	A	A	A	A	B	A	B	A	B	B	A	B	B	B	A	X	A	X	B	B	A	A	A	A	A	B	A	B	B	B	B	X	B	A	A	A	A	A	B	X	A	X	B	B	A
AX-109300906	17	49.752	A	A	A	A	A	A	B	A	B	A	B	B	A	B	B	X	A	A	A	A	A	B	A	A	A	A	A	B	A	B	B	B	B	X	B	A	A	A	A	A	B	X	A	A	B	B	A
AX-110404003	17	50.255	A	A	A	A	A	A	B	A	B	A	B	B	A	B	B	B	A	A	X	B	A	B	A	A	A	A	A	B	A	B	B	B	B	X	B	A	A	A	A	A	B	X	A	A	B	B	A
AX-109914013	17	50.666	B	A	A	X	A	A	B	A	B	A	B	B	A	B	B	B	A	A	X	B	A	B	A	A	A	A	A	B	A	B	B	B	B	X	B	A	A	A	A	A	B	X	A	X	B	B	A
AX-110927266	17	51.957	B	A	A	A	A	A	B	A	A	A	A	B	A	B	B	B	A	A	X	B	A	B	A	A	A	A	A	B	A	B	B	B	B	X	B	A	A	A	A	A	B	X	A	A	B	B	A
AX-111001230	17	52.447	B	A	A	X	A	A	B	A	A	A	X	B	A	B	B	B	A	A	X	B	A	B	A	A	A	A	A	B	A	B	B	B	B	X	B	A	A	A	A	A	B	X	A	X	A	B	A
AX-110199811	17	52.647	B	A	A	A	A	A	B	A	A	A	X	B	A	B	B	X	A	A	X	B	A	B	A	A	A	A	A	B	A	B	B	B	B	X	B	A	A	A	A	X	B	X	A	A	A	B	A
AX-109393472	17	53.403	B	A	A	A	A	A	B	A	A	A	X	B	A	B	B	B	A	A	X	B	A	B	A	A	A	A	A	B	A	B	B	B	B	X	B	A	A	A	A	A	B	X	A	A	A	B	A
AX-110928644	17	53.59	B	A	A	X	A	A	B	A	A	A	A	B	A	B	B	B	A	A	B	B	A	B	A	A	A	A	A	B	A	B	B	B	B	X	B	X	A	A	A	A	B	X	A	X	A	B	A
AX-109577954	17	53.739	B	A	A	A	A	A	B	A	A	A	X	B	A	B	B	X	A	A	X	B	A	B	A	A	A	A	A	B	A	B	B	B	B	X	B	A	A	A	A	A	B	X	A	A	A	B	A
AX-109344577	17	53.886	B	A	A	A	A	A	B	A	A	A	X	B	A	B	B	X	A	A	X	B	A	B	A	A	A	A	A	B	A	B	B	B	B	X	B	A	A	A	A	A	B	X	A	A	A	B	A
AX-110555852	17	54.61	B	A	A	A	A	A	B	A	A	A	X	B	A	B	B	X	A	A	X	B	A	B	A	A	A	B	A	B	A	B	B	B	B	X	B	A	A	A	A	A	B	X	A	A	A	B	A
AX-95224228	17	55.214	B	A	A	X	X	A	B	A	A	A	A	B	A	B	B	X	A	A	A	X	A	A	A	A	A	A	A	B	A	B	B	B	B	B	B	X	A	A	A	A	B	X	A	X	A	B	A
AX-108947996	17	55.323	B	A	A	A	A	A	B	A	A	A	X	B	A	B	B	B	A	A	A	B	A	A	A	A	A	A	A	B	A	B	B	B	B	X	B	X	A	A	A	A	B	X	A	X	A	B	A
AX-109823180	17	55.502	B	A	A	A	A	A	B	A	A	A	X	B	A	B	B	B	A	A	A	B	A	A	A	A	A	A	A	B	A	B	B	B	B	X	B	A	A	A	A	A	B	X	A	X	A	B	A
AX-110570616	17	56.105	B	A	A	X	A	A	B	A	A	A	X	B	A	B	B	X	A	A	A	B	A	A	A	A	A	A	A	B	A	B	B	B	B	X	B	A	A	A	A	A	B	X	A	A	A	B	A
AX-108726594	17	56.288	B	A	A	A	A	A	B	A	A	A	X	B	A	B	B	X	A	A	X	B	A	A	A	A	A	B	A	B	A	B	B	B	B	X	B	A	A	A	A	A	B	X	A	A	A	B	A
AX-109372346	17	56.734	B	A	A	X	A	A	B	A	A	A	X	B	A	B	B	X	A	A	X	B	A	A	A	A	A	B	A	B	A	B	B	B	B	B	B	X	A	A	A	A	B	X	A	A	A	B	A
AX-110407894	17	58.193	B	A	A	X	A	A	B	A	A	A	X	B	A	B	B	B	A	A	A	B	A	A	A	A	A	B	A	B	A	B	B	B	B	X	A	A	A	A	A	A	B	X	A	X	A	B	A
AX-110002353	17	59.251	B	A	A	X	A	A	B	A	A	A	A	B	A	B	B	B	A	A	A	B	A	A	A	A	A	A	A	B	A	B	B	B	B	X	A	A	A	A	A	A	B	X	A	X	A	B	A
AX-108781304	17	59.664	B	A	A	X	A	A	B	A	A	A	X	B	A	B	B	B	A	A	A	B	A	A	A	A	A	B	A	X	A	B	B	B	B	X	A	A	A	A	A	A	B	X	A	X	A	B	A
AX-109464666	17	59.777	B	A	A	X	A	A	B	A	A	A	X	B	A	B	B	B	A	A	A	B	A	A	A	A	A	B	A	B	A	B	B	B	B	X	A	A	A	A	A	A	B	X	A	X	A	B	A
AX-110586105	17	60.249	B	A	A	X	A	A	B	A	A	A	X	B	A	B	B	X	A	A	A	X	A	A	A	A	A	B	A	B	A	B	B	B	B	X	A	A	A	A	A	A	B	B	A	X	A	B	A
AX-111192864	17	61.001	B	A	A	B	A	A	B	A	X	A	X	B	A	B	B	B	A	A	A	B	A	A	A	A	A	X	A	B	A	B	B	B	B	X	A	A	A	A	A	A	B	X	A	X	A	B	A
AX-111680522	17	61.243	B	A	A	X	A	A	B	A	A	A	X	B	A	B	B	B	A	A	A	B	A	A	A	A	A	B	A	B	A	B	B	B	B	X	A	A	A	A	A	A	B	X	A	X	A	B	A
AX-109491463	17	62.711	B	A	A	X	A	A	B	A	A	A	X	B	A	B	B	B	A	A	A	B	A	A	A	A	A	B	A	X	A	B	B	B	B	X	A	A	A	A	A	A	A	X	A	X	A	B	A
AX-111824500	17	62.943	B	A	A	X	A	A	B	A	A	A	X	B	A	B	B	B	A	A	A	B	A	A	A	A	A	B	A	X	A	B	B	B	A	X	A	A	A	A	A	X	A	X	A	X	A	X	A
AX-110553539	17	64.462	B	A	A	B	A	A	B	A	A	A	X	B	A	B	B	B	A	A	A	B	A	A	A	A	A	B	A	X	A	X	B	B	B	X	A	A	A	A	A	A	A	X	A	X	A	A	A
AX-109816926	17	64.753	B	A	A	X	A	A	B	A	A	A	X	B	A	B	B	B	A	A	A	B	A	A	A	A	A	B	A	X	A	X	B	B	B	X	A	A	A	A	A	A	A	X	A	X	A	A	A
AX-110576978	17	65.198	B	A	A	B	A	A	B	A	A	A	X	B	A	B	B	B	A	A	A	B	A	A	A	A	A	A	A	X	A	X	B	B	B	X	A	A	A	A	A	A	A	X	A	X	A	A	A
AX-110602529	17	65.488	A	A	A	X	A	A	B	A	A	A	X	B	A	B	B	B	A	A	A	B	A	A	A	A	A	A	A	X	A	X	B	B	B	B	A	A	A	A	A	A	A	X	A	X	A	A	A
AX-108740057	17	65.933	A	A	A	B	A	A	B	A	A	A	X	B	A	B	B	B	A	X	A	B	A	A	A	A	A	A	A	X	A	X	B	B	B	B	A	A	A	A	A	X	A	X	A	X	A	A	A
AX-111138623	17	66.037	B	A	A	X	A	A	B	A	A	A	X	B	A	B	B	B	A	A	A	B	A	A	A	A	A	A	A	A	A	A	B	B	B	X	A	A	A	A	A	X	A	X	A	X	A	A	A
AX-110737087	17	66.34	B	A	A	X	A	A	B	A	A	A	A	B	A	B	B	B	A	A	A	B	A	A	A	A	A	A	A	X	A	X	B	B	B	X	A	A	A	A	A	A	A	X	A	X	A	A	A
AX-108969131	17	67.146	B	A	A	X	A	A	B	A	A	A	A	B	A	B	B	B	A	A	A	B	A	A	A	A	A	A	A	X	A	X	B	B	B	B	A	A	B	A	A	A	A	B	A	X	A	A	A
AX-108793108	17	67.461	A	A	A	B	A	A	B	A	A	A	A	B	A	B	B	B	A	A	A	B	A	A	A	A	A	A	A	X	A	X	B	B	B	B	A	A	B	A	A	A	A	X	A	X	A	A	A
AX-111091201	17	68.217	B	A	A	X	A	A	B	A	A	A	A	B	A	B	B	B	A	A	A	B	A	A	A	A	A	A	A	X	A	X	B	B	B	B	A	A	B	A	A	A	A	B	A	X	A	A	A
AX-110198215	17	68.721	A	A	A	X	A	A	B	A	A	A	A	B	A	B	B	B	A	A	A	B	A	A	A	A	A	A	A	X	A	X	B	B	B	X	A	A	B	A	A	A	A	X	A	X	A	A	A
AX-111567801	17	69.433	A	A	A	X	A	A	B	A	A	A	A	B	A	B	B	B	X	A	A	B	X	A	A	A	A	A	A	X	A	X	B	A	B	X	A	A	B	A	A	A	A	X	A	X	A	A	A
AX-108856152	17	71.59	A	A	A	X	A	A	B	A	A	A	A	B	A	B	B	B	A	A	A	B	A	A	A	A	A	A	A	X	A	X	B	A	B	B	A	A	B	A	A	A	A	B	A	X	A	A	A
AX-109335921	17	73.113	A	A	A	X	A	A	B	A	A	A	X	B	A	A	B	B	A	A	A	B	A	A	A	A	A	A	A	X	A	X	B	A	B	X	A	A	B	A	A	A	A	X	A	X	A	A	A
AX-109994687	17	73.926	A	A	A	X	A	A	B	A	A	A	X	B	A	A	B	B	A	A	A	B	A	A	A	A	A	A	A	X	A	X	B	A	B	B	A	A	B	A	A	A	A	X	A	X	A	A	A
AX-108972799	17	74.371	A	A	A	X	A	A	B	A	A	A	X	B	A	A	B	B	A	A	B	B	A	A	A	A	A	A	A	X	A	X	B	A	B	X	A	A	B	A	A	A	A	X	A	X	A	A	A
AX-110512495	17	76.939	B	A	A	X	A	A	A	A	X	A	X	B	A	A	B	X	A	X	B	B	A	A	A	A	A	B	A	B	A	B	B	X	B	X	A	A	B	A	A	A	A	X	A	X	A	A	A
AX-111011135	17	78.521	B	A	A	X	B	A	A	A	A	A	X	B	A	A	B	X	A	X	B	B	A	A	A	A	A	A	A	X	A	B	B	X	B	X	A	A	B	A	A	A	A	A	A	X	A	A	A
AX-109280877	17	79.201	B	A	A	X	B	A	A	A	A	A	X	B	A	A	B	X	A	X	B	B	A	A	A	A	B	A	A	A	A	B	B	X	B	X	A	A	B	A	A	A	A	A	A	X	A	A	A
AX-110040469	17	80.995	B	A	A	X	B	A	A	A	A	A	X	B	A	A	B	B	A	X	B	B	A	A	A	A	B	B	A	X	A	B	B	X	B	X	A	A	B	A	A	A	A	A	A	X	A	A	A
AX-111127271	17	82.834	B	A	A	X	B	A	A	A	A	A	X	B	A	A	B	B	A	B	B	B	A	A	A	A	B	B	A	B	A	B	B	X	B	X	A	A	B	A	B	A	A	A	A	X	A	B	A
AX-110122533	17	84.044	B	A	A	X	B	A	A	A	A	A	X	B	A	A	B	B	A	B	B	B	A	A	A	A	B	B	A	B	A	B	B	A	B	X	A	A	B	A	B	A	A	A	A	X	A	B	A
AX-109411902	17	86.002	B	A	A	X	B	X	A	A	A	A	X	B	A	A	B	B	X	B	B	B	A	A	B	A	B	B	A	B	A	B	B	A	B	X	A	A	B	B	B	B	A	A	X	X	A	B	A
AX-111144786	17	87.054	B	A	A	X	B	A	A	A	A	A	B	B	A	A	B	B	X	X	B	B	A	A	B	A	B	B	X	B	A	B	B	A	B	X	A	A	B	X	B	B	A	A	A	X	A	B	A
AX-110929675	17	87.531	B	A	A	X	B	A	A	A	A	A	B	B	A	A	B	B	X	X	B	B	A	A	B	A	B	B	X	B	A	B	A	A	B	X	A	A	B	X	B	B	A	A	A	X	A	B	A
AX-111763420	17	88.252	B	A	A	X	B	A	A	A	A	A	X	B	A	A	B	X	X	X	B	B	A	A	B	A	B	A	A	B	A	B	A	A	B	B	A	A	B	X	B	B	A	A	A	X	A	B	A
AX-108922935	17	89.966	X	A	A	X	B	A	A	A	A	A	B	B	A	A	B	X	X	X	B	B	A	X	B	A	B	A	A	B	A	B	A	A	B	X	A	A	B	X	B	B	A	A	A	X	A	B	A
AX-110989869	17	91.83	B	A	A	A	B	A	A	A	A	A	B	B	A	A	B	B	B	X	B	B	A	X	B	A	B	B	X	X	A	B	A	A	B	B	A	B	B	A	B	B	A	A	A	X	A	B	B
AX-109355158	17	97.592	B	A	A	X	A	A	A	A	A	A	B	B	A	B	B	X	A	X	A	B	A	X	B	B	B	B	X	X	A	B	B	A	B	B	A	B	B	A	A	B	A	A	B	X	B	B	B
AX-109876626	17	98.979	B	A	A	X	A	A	A	A	A	A	X	B	A	B	B	A	A	X	A	B	A	X	B	B	B	B	A	X	A	B	B	A	B	B	A	B	B	A	A	B	A	A	B	X	B	B	B
AX-111696570	17	99.723	B	A	A	X	A	A	A	A	A	A	B	B	A	B	B	A	A	X	A	B	A	B	B	B	B	A	A	X	A	B	B	A	B	B	A	B	B	A	A	B	A	A	B	B	B	B	B
AX-111683522	17	99.83	B	A	A	X	B	A	A	A	A	A	B	B	A	B	B	X	A	X	A	B	A	X	B	B	B	B	X	X	A	B	B	B	B	B	A	B	B	A	B	B	A	A	B	B	A	B	B
AX-110515622	17	103.895	B	A	A	X	A	A	A	A	A	A	B	B	A	A	B	A	X	X	A	B	A	B	B	B	B	A	B	B	A	B	B	A	B	B	A	B	B	A	A	B	A	A	B	B	B	B	B
AX-110460330	17	105.551	B	A	A	X	A	A	A	A	B	A	B	B	A	A	B	A	B	X	A	B	A	X	B	B	B	A	B	X	A	B	B	A	B	B	A	B	B	A	A	B	A	A	B	B	B	B	B
AX-109388366	17	107.17	B	A	A	X	A	A	A	A	B	A	B	B	A	A	B	A	X	X	A	B	A	X	B	B	B	A	X	X	A	B	B	A	B	B	A	B	B	A	A	B	A	A	A	X	B	B	B
AX-110924349	17	107.428	B	A	A	X	A	A	A	A	B	A	B	B	A	A	B	A	B	X	A	B	A	B	B	B	B	A	B	X	A	B	B	A	B	B	A	B	B	A	A	B	A	A	A	X	B	B	B
AX-110615523	17	113.969	B	A	A	X	A	A	A	A	B	A	B	B	A	A	B	A	A	X	A	B	A	X	B	B	B	B	A	X	A	B	B	A	B	B	A	B	B	A	B	X	A	A	A	B	A	B	B
AX-110062048	17	114.791	B	A	A	X	A	A	A	A	B	B	B	B	A	A	B	A	A	X	A	B	A	B	B	B	B	B	A	X	A	B	B	A	B	B	A	B	B	A	B	X	A	A	A	B	A	B	B
AX-110616775	17	115.272	B	A	A	X	A	A	A	A	B	B	B	B	A	A	B	A	A	X	A	B	A	B	B	B	B	B	A	X	A	B	B	A	B	B	A	B	B	A	B	B	A	A	A	X	A	B	B
AX-108891480	17	120.354	B	A	A	X	A	A	A	A	B	B	B	B	A	A	B	A	A	X	A	B	A	B	A	B	B	B	A	X	A	B	A	A	B	B	A	B	B	A	B	X	A	A	A	B	A	B	B
AX-110413070	17	120.618	B	A	A	X	A	A	A	A	B	B	B	B	A	A	B	X	A	X	A	B	A	B	A	B	B	B	A	X	A	B	A	A	B	B	A	B	B	A	B	B	A	A	A	B	A	B	B
AX-108984460	17	121.931	B	A	A	X	A	A	A	A	B	B	B	B	A	A	B	A	A	X	A	B	A	B	A	B	B	B	A	X	A	B	A	A	B	B	A	B	B	A	B	X	A	A	A	B	A	B	B
AX-109767644	18	0	A	A	A	X	B	A	A	A	A	A	A	B	A	B	B	X	A	A	A	B	B	B	B	B	B	B	A	A	A	B	B	B	A	A	B	A	A	B	A	A	B	B	B	X	A	A	A
AX-110963457	18	2.176	B	A	A	B	B	A	A	A	A	A	A	B	X	B	B	B	A	A	A	B	B	B	A	B	B	B	A	X	A	B	A	B	A	A	B	A	A	B	A	A	B	B	B	X	A	A	A
AX-109742573	18	4.425	X	A	A	X	B	A	A	A	A	A	A	B	X	B	B	B	A	A	A	B	B	B	A	B	B	B	A	A	A	B	A	B	A	A	B	A	A	B	A	A	B	B	B	X	A	A	A
AX-111931231	18	4.973	A	A	A	X	B	A	A	A	A	A	A	B	X	B	B	B	A	A	A	B	B	B	A	B	B	B	A	A	A	B	A	B	A	A	B	A	A	B	A	A	B	B	B	X	A	A	A
AX-109897623	18	5.893	A	A	A	X	B	B	A	A	A	A	A	B	X	B	B	B	A	A	A	B	B	B	A	B	B	B	A	X	A	B	A	B	A	A	B	A	A	B	A	A	B	B	B	X	A	A	A
AX-110623160	18	6.638	X	A	A	X	B	B	A	A	A	A	A	B	X	B	B	B	A	A	A	B	B	B	A	B	A	B	A	A	A	B	A	B	A	A	B	A	A	B	X	A	B	B	B	X	A	A	A
AX-111716941	18	8.468	X	A	A	B	B	B	A	A	A	A	A	B	A	B	B	B	A	A	A	B	B	B	A	B	B	B	A	X	A	B	A	B	A	X	B	B	A	B	B	A	B	B	B	X	A	A	A
AX-109088524	18	10.709	X	A	A	B	B	B	A	A	A	A	A	B	X	B	B	B	A	A	X	B	B	B	A	B	B	B	A	X	B	B	A	B	A	X	B	B	A	B	B	B	B	B	B	X	A	A	A
AX-89314506	18	14.599	X	A	A	X	B	X	A	A	A	A	A	B	A	B	B	B	A	A	X	A	B	B	A	B	B	B	X	B	B	B	A	B	A	X	B	B	A	B	B	B	B	B	B	X	A	A	A
AX-109532919	18	24.582	A	A	A	X	B	X	A	A	X	A	X	B	A	B	A	B	X	A	B	B	B	B	A	B	B	B	A	A	B	X	A	B	A	B	A	B	A	B	B	B	B	B	B	B	A	B	B
AX-109515835	18	25.533	A	A	A	B	B	X	A	A	X	A	A	B	A	B	A	B	X	A	B	B	B	B	A	B	B	B	A	B	A	X	A	B	A	B	A	B	A	B	A	B	B	B	B	B	A	B	B
AX-108802393	18	26.405	A	A	A	X	B	X	A	A	X	A	A	B	A	B	A	B	X	A	B	B	B	B	A	B	B	B	A	X	X	X	A	B	A	B	A	B	A	B	A	B	B	B	B	B	A	B	B
AX-111696257	18	26.666	A	A	X	B	B	X	A	A	A	A	A	B	A	B	A	B	X	A	B	B	B	B	A	B	B	B	A	A	A	X	A	B	A	B	A	B	A	B	A	B	B	B	B	B	A	B	B
AX-109940229	18	26.908	A	A	X	X	B	X	A	A	A	A	A	B	A	B	A	B	X	A	B	B	B	B	X	B	B	B	A	X	X	X	A	B	A	B	A	B	A	B	A	B	B	B	B	B	A	B	B
AX-110662688	18	28.666	X	A	A	B	B	X	A	A	A	A	A	B	A	B	A	B	A	A	B	B	B	B	B	B	B	B	A	X	X	X	A	B	A	B	A	B	A	B	A	B	B	B	B	B	A	B	B
AX-109836360	18	29.119	X	A	X	B	B	X	A	A	A	A	A	B	A	B	A	B	A	A	X	B	B	B	B	B	B	B	A	X	A	X	A	A	A	B	A	B	A	B	A	B	B	B	B	B	A	B	B
AX-111189875	18	29.848	X	A	X	B	B	X	A	A	X	A	A	B	A	B	A	B	X	A	B	B	B	B	B	B	B	B	A	X	X	X	A	A	A	B	A	B	A	B	A	B	B	B	B	B	A	B	B
AX-108771961	18	30.788	X	A	X	B	B	X	A	A	A	A	A	B	A	B	A	B	X	A	B	B	B	B	B	B	B	X	A	B	B	X	A	A	A	B	A	B	A	B	A	B	B	B	B	B	A	B	B
AX-109165959	18	31.71	X	A	X	A	B	X	A	A	A	X	A	B	A	B	A	B	X	A	B	B	B	B	B	B	B	X	A	X	X	X	A	A	A	B	A	B	A	B	A	B	B	B	X	B	A	B	B
AX-111663576	18	37.386	B	A	A	B	B	A	A	A	A	X	A	B	A	B	A	B	B	A	X	B	A	X	B	B	B	X	B	A	B	B	A	A	A	B	A	X	A	B	A	B	B	B	X	B	A	A	B
AX-110392637	18	38.651	B	A	X	X	B	A	A	B	A	X	A	B	A	B	A	B	B	A	X	B	A	B	B	B	B	X	B	X	B	B	A	A	A	B	A	B	A	B	A	B	B	B	X	B	A	A	B
AX-110969004	18	39.434	B	A	X	X	B	A	A	B	A	X	A	B	A	B	A	B	B	A	X	B	A	B	B	B	B	A	B	X	B	B	A	A	A	B	A	B	A	B	A	B	B	B	X	B	A	A	B
AX-110208453	18	39.926	B	A	X	X	B	A	A	B	A	X	A	B	A	B	A	B	B	A	B	B	A	B	B	X	B	X	B	X	B	B	A	A	A	B	A	B	A	B	A	B	B	B	X	B	A	A	B
AX-109194293	18	40.42	B	A	X	B	B	A	A	B	A	X	A	B	A	B	A	B	B	A	X	B	A	B	B	B	B	X	B	B	B	B	A	A	A	B	A	B	A	B	A	B	B	B	X	B	A	A	B
AX-108966812	18	50.447	B	A	X	B	B	A	A	B	B	X	A	B	A	A	A	B	B	A	B	B	A	B	B	X	A	B	X	B	B	X	A	A	A	B	A	B	A	B	A	X	B	B	X	B	B	A	A
AX-108896531	18	51.61	B	A	A	B	B	A	B	B	B	X	A	B	A	A	A	X	B	A	B	B	B	B	B	B	A	X	X	B	B	X	A	A	A	B	A	B	A	B	A	B	B	B	X	B	B	A	A
AX-95652832	18	52.234	B	A	X	X	B	A	B	B	B	X	A	B	X	A	A	B	B	A	B	B	B	B	B	B	A	B	X	B	B	X	A	A	A	B	A	B	A	B	A	X	B	B	X	X	B	A	B
AX-89511305	18	54.16	B	A	X	B	B	B	B	B	B	X	A	B	A	A	A	B	A	A	B	B	B	B	B	B	A	B	X	B	B	X	A	A	A	B	A	B	A	B	A	A	B	B	X	X	B	A	B
AX-111150279	18	55.134	B	A	X	B	B	B	B	B	B	X	A	B	A	A	A	B	A	A	B	B	B	B	B	B	A	B	X	B	B	X	A	A	A	B	A	B	A	B	A	A	B	B	X	X	B	A	B
AX-94441507	18	60.285	B	A	B	X	B	B	B	B	B	B	X	A	A	A	A	B	A	A	B	A	B	B	B	A	A	B	X	B	B	X	A	A	A	B	A	B	A	B	A	A	B	B	X	X	B	A	B
AX-94801617	18	60.647	B	A	X	X	B	B	B	B	B	B	A	A	A	A	A	B	A	A	B	A	B	B	B	A	A	B	A	B	B	X	A	A	A	B	A	B	A	B	A	A	B	B	X	X	B	A	B
AX-109034288	18	63.286	B	A	B	B	B	B	B	B	B	B	X	A	B	A	A	B	A	A	X	A	B	B	B	A	A	B	A	B	B	X	A	B	A	B	A	B	A	A	A	A	B	B	X	X	B	A	B
AX-110833215	18	64.981	B	A	B	X	B	B	B	B	B	B	X	A	B	A	A	X	X	A	X	A	B	B	B	A	A	A	X	B	B	X	A	A	A	B	A	B	A	A	A	A	B	B	A	B	B	A	A
AX-108954528	18	65.403	B	A	B	X	B	B	B	B	B	B	X	A	B	A	A	A	X	A	X	A	B	B	B	A	A	A	A	B	B	X	A	A	A	B	A	B	A	A	A	A	B	B	X	X	B	A	A
AX-108792360	18	66.258	B	A	B	B	B	B	B	B	B	B	X	A	B	A	A	X	X	A	X	A	B	B	B	A	A	A	A	B	B	X	A	X	A	B	A	B	A	A	A	A	B	B	X	B	B	A	A
AX-110482347	18	69.321	B	A	B	B	B	B	B	B	B	B	X	A	B	A	A	B	X	A	X	A	B	B	B	A	A	X	X	B	B	X	A	X	A	B	B	B	A	B	A	B	B	B	B	X	B	A	X
AX-110518840	18	70.851	B	A	B	X	B	B	B	B	B	B	A	A	B	A	A	X	X	A	X	A	A	B	B	A	A	X	X	B	B	X	A	X	A	B	B	B	A	B	B	B	B	B	B	X	B	A	X
AX-110336440	18	75.383	B	A	B	A	B	B	B	B	B	B	B	A	X	A	A	A	X	B	X	A	A	B	B	A	A	A	X	B	B	X	A	A	A	B	B	B	A	B	B	B	B	B	B	X	B	B	A
AX-111631690	18	80.838	B	A	B	A	B	B	B	B	A	B	B	B	X	A	A	B	A	B	A	A	A	B	B	A	A	B	A	B	B	X	A	B	A	B	B	B	A	B	B	B	B	B	B	X	B	B	B
AX-110231283	18	83.438	B	A	B	X	B	B	B	B	A	B	B	B	X	A	A	B	A	B	A	A	A	B	X	A	A	B	A	B	B	X	A	B	A	B	B	X	A	B	B	B	B	B	B	B	B	B	A
AX-111068743	18	84.547	B	A	B	A	B	B	B	B	A	B	B	B	A	X	X	B	A	B	A	A	A	B	X	A	A	B	A	B	B	A	A	B	A	B	B	X	A	B	B	B	B	B	B	B	B	B	A
AX-108858685	19	0	A	B	X	X	B	A	A	A	B	B	X	B	A	B	B	B	B	B	B	A	A	A	B	B	A	B	X	A	B	B	A	A	B	A	B	A	B	B	B	B	A	A	B	X	B	A	B
AX-108857229	19	0.322	X	B	X	X	B	A	A	A	B	B	X	B	A	B	B	B	B	B	B	A	A	A	B	B	A	B	A	A	X	B	A	X	B	A	B	X	B	B	B	B	A	A	B	A	B	A	B
AX-110483957	19	1.074	A	B	A	B	B	A	A	A	B	B	A	B	A	B	B	B	B	B	B	A	A	A	X	B	A	B	X	A	X	B	A	X	B	A	B	A	B	B	B	B	A	A	B	A	B	A	B
AX-111697683	19	1.521	A	B	X	X	B	A	A	A	B	B	X	B	A	B	B	B	B	B	B	A	A	A	X	B	A	B	X	A	X	B	A	A	B	A	B	A	B	B	B	B	A	A	B	X	B	A	B
AX-111001599	19	2.915	A	B	A	B	B	A	A	A	B	B	A	B	A	B	B	B	B	B	B	A	A	A	B	B	A	B	X	A	X	B	A	A	B	A	B	A	B	B	B	B	A	A	B	X	B	A	B
AX-108738017	19	3.108	X	B	X	B	B	A	A	A	B	B	X	B	A	B	B	B	B	B	B	A	A	A	B	B	A	B	X	A	B	B	A	A	B	A	B	X	B	B	B	B	A	A	B	B	B	A	B
AX-110512712	19	3.551	A	B	X	B	B	A	A	A	B	B	X	B	B	B	B	B	B	B	B	A	A	A	B	B	A	B	X	A	X	B	A	A	B	A	B	X	B	B	B	B	A	A	B	X	B	A	B
AX-109287014	19	4.169	X	B	X	B	B	A	A	A	B	B	X	B	B	B	B	B	B	B	B	A	A	A	B	B	A	B	X	A	B	B	A	A	B	A	B	X	B	B	B	B	A	A	B	X	B	A	B
AX-109394807	19	8.612	A	B	X	B	B	A	A	A	B	B	X	B	B	B	B	A	B	B	B	A	A	A	B	B	A	B	X	B	X	B	A	X	B	X	B	B	A	B	B	B	A	A	B	B	B	A	B
AX-111116295	19	14.016	A	A	A	B	B	A	A	A	B	B	X	B	B	B	B	A	X	B	B	A	A	A	B	B	A	B	X	B	X	B	A	X	B	A	B	B	A	B	B	B	A	A	B	B	B	A	B
AX-110973510	19	15.891	A	A	A	B	B	A	A	A	B	B	X	A	B	B	B	A	B	B	B	A	A	A	B	B	A	A	X	B	X	B	A	X	B	X	B	B	A	B	A	B	A	A	B	B	B	A	B
AX-110915503	19	16.321	A	A	A	X	B	A	A	A	B	B	A	A	B	B	B	X	X	B	B	A	A	A	B	B	A	B	X	B	X	B	A	A	B	B	B	B	A	X	B	B	A	A	B	B	B	A	B
AX-111549750	19	16.891	A	A	A	X	B	A	A	A	B	B	X	A	B	B	B	A	B	B	B	A	A	A	B	B	A	A	X	B	X	B	A	A	B	B	B	B	A	B	A	B	A	A	B	B	B	A	B
AX-111488311	19	17.538	A	A	A	B	B	A	A	X	B	B	X	A	B	B	B	A	X	B	B	A	A	A	B	B	A	B	X	B	X	B	A	A	B	B	B	X	A	B	B	B	A	A	B	B	B	A	B
AX-111159721	19	18.608	A	A	B	B	B	A	A	A	B	B	X	A	B	B	B	A	X	B	B	A	A	A	B	B	A	B	X	B	X	B	A	A	B	B	B	X	A	B	A	B	A	A	B	B	B	A	B
AX-109512172	19	19.308	A	A	B	B	B	A	B	A	B	B	A	A	B	B	B	A	X	B	B	A	A	A	B	B	A	B	X	B	X	B	A	A	B	B	B	X	A	B	A	B	A	A	B	B	B	A	B
AX-109859198	19	20.323	A	A	B	B	B	A	B	A	B	B	X	A	B	B	B	A	X	B	B	A	A	A	B	B	A	B	X	B	X	B	A	A	B	B	B	X	A	B	A	B	A	A	B	B	B	A	B
AX-110109325	19	20.817	A	A	B	B	B	A	B	A	B	B	A	A	B	B	B	A	X	B	B	A	A	A	B	B	A	B	X	B	X	B	A	A	B	B	B	B	A	B	A	B	A	A	B	X	B	A	B
AX-108907186	19	23.944	B	A	B	B	B	A	B	A	B	B	A	A	B	B	B	A	X	B	B	A	A	A	B	B	A	B	A	B	X	B	A	A	B	B	B	B	A	B	B	B	A	A	B	X	B	X	B
AX-111687674	19	25.026	B	A	B	X	B	A	B	A	B	B	A	A	B	B	B	A	X	B	B	A	A	A	B	B	A	A	A	B	X	B	A	A	B	B	B	X	A	B	A	B	A	A	B	X	B	A	B
AX-111486305	19	26.146	B	A	B	X	B	A	B	A	B	B	A	A	A	B	B	A	X	B	B	A	A	A	B	B	A	B	A	B	X	B	A	A	B	B	B	X	A	B	B	B	A	A	B	X	B	B	B
AX-111094661	19	28.703	B	A	B	A	B	A	B	A	B	B	A	A	A	B	B	A	X	B	B	A	A	A	X	B	A	A	A	B	X	B	A	A	B	B	B	B	A	X	A	X	A	A	B	X	X	B	X
AX-110018839	19	31.274	A	A	B	X	B	A	B	A	B	B	X	A	A	B	B	A	X	B	B	A	A	A	B	B	A	A	A	B	X	B	A	A	B	X	B	A	A	B	A	B	A	A	B	B	B	B	B
AX-109289312	19	32.681	A	A	B	A	B	A	B	A	A	B	B	A	A	B	B	A	X	B	B	A	A	A	B	B	A	A	X	B	B	B	A	X	B	X	B	X	A	B	A	B	A	A	B	B	B	B	B
AX-109866369	19	33.357	X	A	B	X	B	A	B	A	A	B	B	A	B	B	B	A	X	B	B	A	A	A	B	B	A	A	X	B	X	B	A	X	B	X	B	A	A	B	A	B	A	A	B	X	B	B	B
AX-108856333	19	35.583	A	A	B	A	B	A	B	A	A	B	B	A	B	A	B	A	X	B	B	A	A	A	B	B	A	A	X	B	X	B	A	A	B	X	B	A	A	B	A	B	A	A	X	X	B	B	B
AX-111489678	19	37.998	X	A	B	A	B	A	B	A	A	B	B	A	B	A	B	B	X	B	B	A	A	A	B	B	A	B	X	B	B	B	A	A	B	X	B	A	A	B	B	B	A	A	X	B	B	B	B
AX-109886588	19	38.906	X	A	B	X	B	A	B	A	A	B	B	A	B	A	B	B	X	B	B	A	A	A	X	B	A	A	X	B	B	B	A	B	B	X	B	A	A	B	A	B	A	A	X	B	B	B	B
AX-109527138	19	44.489	X	A	B	B	B	A	B	A	A	B	B	A	B	A	B	B	B	B	B	B	A	A	B	B	A	B	B	B	B	B	B	B	B	B	B	X	A	B	B	B	A	A	X	B	B	A	B
AX-111010409	19	45.28	B	B	B	X	B	A	B	A	A	B	B	A	B	A	B	B	X	B	B	B	A	A	X	B	A	B	B	B	B	B	B	B	B	B	B	A	A	B	B	B	A	A	X	X	B	A	B
AX-111039262	19	45.618	B	B	B	X	B	A	B	A	A	B	B	A	B	A	B	B	X	B	B	B	A	A	B	B	A	B	B	B	B	B	B	B	B	B	B	A	A	B	B	B	A	A	X	B	B	A	B
AX-111473783	19	46.789	B	B	B	A	B	A	B	A	A	B	B	X	B	A	B	B	X	B	B	B	A	A	B	B	A	A	B	B	B	B	B	B	B	B	B	X	A	B	A	B	A	A	X	B	B	A	B
AX-109864924	19	49.559	B	B	B	X	B	A	B	A	A	B	B	A	B	A	B	B	A	B	B	B	A	A	B	B	A	A	B	B	B	B	B	B	B	B	B	B	A	B	A	B	X	A	B	X	B	A	A
AX-111674203	19	50.247	B	B	B	B	B	B	B	A	A	B	B	A	B	A	B	B	A	B	B	B	A	A	B	B	A	A	B	B	B	B	B	B	B	B	B	B	A	B	A	B	A	A	X	X	B	A	A
AX-108938437	19	59.868	B	B	B	X	A	B	B	A	A	B	B	A	B	A	B	B	B	B	B	B	A	A	B	A	A	A	B	B	A	A	B	B	B	B	A	B	A	A	B	A	A	X	X	B	B	B	B
AX-109542943	19	60.81	B	B	B	X	A	B	B	A	A	B	B	A	B	A	B	B	B	B	B	B	A	A	B	A	A	A	B	B	A	A	B	B	B	B	A	B	A	A	A	A	A	X	X	B	B	B	A
AX-111044435	19	62.615	A	A	A	B	A	B	B	B	B	A	B	A	B	A	A	A	B	B	A	B	B	B	A	A	A	B	B	B	A	A	B	B	B	A	A	A	B	B	B	B	A	B	B	B	B	A	B
AX-111516679	19	63.644	B	B	B	A	A	B	B	A	A	B	B	A	B	A	B	B	B	X	B	B	A	A	B	B	A	A	B	B	A	A	B	B	B	B	A	B	A	A	B	B	A	X	X	B	B	B	B
AX-111518294	19	65.669	B	B	B	A	A	B	B	A	A	B	B	A	B	A	A	B	B	X	B	B	A	A	B	B	A	A	B	B	A	A	B	B	B	A	A	B	A	A	B	B	A	X	X	B	B	B	B
AX-108873427	19	66.296	X	A	A	B	A	B	B	B	B	A	B	A	B	A	A	A	B	B	A	B	A	B	A	A	A	B	B	B	A	A	B	X	B	A	B	A	B	B	X	B	B	B	B	B	B	A	B
AX-108926447	19	67.134	X	X	A	B	A	B	B	B	B	A	B	A	B	A	A	A	B	B	A	B	A	B	A	A	A	B	B	B	A	A	B	X	B	A	B	X	B	B	X	B	B	B	B	B	B	A	B
AX-111510959	19	68.184	B	B	B	X	A	B	A	A	A	B	B	A	B	A	A	B	B	X	B	A	A	X	B	B	A	A	B	B	A	A	B	B	A	A	A	B	A	A	B	B	A	X	X	B	B	B	B
AX-111605128	19	69.794	B	B	B	A	A	B	A	A	A	B	B	A	B	A	A	B	B	X	B	A	A	X	B	B	A	A	B	B	A	B	B	B	A	A	A	B	A	A	A	B	A	X	X	B	B	B	A
AX-108824792	19	70.559	B	B	B	A	A	B	A	A	A	B	B	A	B	A	A	B	B	X	B	A	A	B	B	B	A	A	B	B	A	B	B	B	A	A	A	B	A	A	A	B	A	B	X	B	B	B	A
AX-111495047	19	70.884	B	B	B	A	A	B	A	A	A	B	B	A	B	A	A	B	B	X	B	A	A	B	B	B	A	A	B	B	A	B	B	B	A	A	A	B	A	A	A	B	A	X	X	B	B	B	A
AX-108795572	19	70.923	B	X	A	B	A	B	B	B	B	A	B	A	B	B	A	A	B	B	A	B	A	B	A	A	B	A	B	A	A	A	B	A	B	A	B	X	B	B	A	B	X	B	B	B	B	A	B
AX-111151663	19	71.544	B	B	B	A	A	B	A	A	A	B	B	A	B	A	A	B	B	X	B	A	A	B	B	B	A	A	B	B	A	B	B	B	A	A	A	B	A	A	B	B	A	A	X	B	B	B	X
AX-109062549	19	73.141	X	A	A	B	A	B	B	B	B	A	B	A	B	B	A	A	B	X	A	B	A	B	A	A	B	B	B	X	A	A	B	A	B	A	B	A	B	B	B	B	X	B	B	B	B	A	B
AX-111641045	19	77.282	X	A	A	B	A	B	B	B	B	A	B	A	B	B	A	X	B	X	A	B	A	B	A	A	B	B	B	B	A	A	B	A	B	A	B	A	B	B	B	B	X	B	B	X	B	X	A
AX-111631796	19	77.815	B	A	A	B	A	B	B	B	B	A	B	A	B	B	A	A	B	X	A	B	A	B	A	A	B	B	B	B	A	A	B	A	B	A	B	A	B	B	B	B	X	B	B	B	B	X	A
AX-110490517	19	79.433	B	X	A	B	A	B	B	B	B	A	B	A	B	B	A	A	B	B	A	B	A	B	X	A	B	X	B	B	A	A	B	A	B	A	B	X	B	B	X	B	B	B	B	B	B	X	A
AX-111702777	19	80.367	B	B	A	B	A	B	B	B	B	A	B	A	B	B	B	A	B	X	A	B	A	B	A	A	B	B	B	X	A	A	B	A	B	A	B	A	B	B	B	B	X	B	B	B	B	A	A
AX-108947190	19	81.393	B	B	A	B	A	B	B	B	B	A	B	A	B	B	A	A	B	X	A	B	A	B	A	A	B	A	B	X	A	A	B	A	B	A	B	A	B	B	A	B	X	B	B	B	B	A	A
AX-111642321	19	82.163	B	B	A	B	A	B	B	B	B	A	B	A	B	B	B	A	B	X	A	B	A	B	A	A	B	A	B	X	A	A	B	A	B	A	B	A	B	B	A	B	X	B	B	X	B	X	A
AX-109902411	19	82.359	B	B	A	A	A	A	A	A	A	B	B	B	B	A	B	B	B	X	A	A	A	X	B	B	X	A	B	B	A	B	B	B	A	B	A	B	A	X	B	X	A	A	B	B	B	B	A
AX-109963008	19	82.656	B	B	A	B	A	B	B	B	B	A	B	A	X	B	A	A	B	X	A	B	A	B	A	A	B	A	B	X	A	A	B	A	B	A	B	A	B	B	A	B	X	B	B	B	B	A	A
AX-109916202	19	82.812	B	B	A	B	A	B	B	B	B	A	B	A	B	B	A	A	B	X	A	B	A	B	A	A	B	A	B	X	A	A	B	B	B	A	B	A	B	B	A	B	X	B	B	B	B	X	A
AX-110526555	19	83.219	B	B	A	A	A	A	A	A	A	B	A	B	B	A	B	B	B	A	A	A	A	X	X	B	A	A	B	B	A	B	B	B	A	B	A	B	A	X	B	X	A	A	B	B	B	A	X
AX-108853295	19	86.271	B	B	A	A	A	A	A	A	B	B	A	B	B	A	B	B	B	X	A	A	A	B	B	B	A	A	B	B	B	B	B	B	A	B	A	B	A	B	A	X	X	A	A	B	B	B	A
AX-109270297	19	86.906	B	B	A	A	A	A	A	A	B	B	A	B	B	A	B	A	B	X	A	B	A	B	B	B	X	A	B	B	B	B	B	B	A	B	A	X	A	B	A	X	X	A	A	B	B	B	A
AX-110905664	19	87.479	B	B	A	A	A	A	A	A	B	B	A	B	B	A	B	B	B	X	A	A	A	X	B	B	X	A	B	B	X	B	B	B	A	B	A	A	A	X	A	X	X	A	A	B	B	B	A
AX-108958957	19	89.469	X	B	A	A	A	A	A	A	B	B	A	B	B	A	B	A	B	A	A	B	A	A	B	B	A	A	B	B	X	B	B	B	A	B	A	X	A	A	B	A	A	A	A	B	B	B	A
AX-110536970	19	90.323	B	B	A	A	A	A	A	A	B	B	A	B	B	A	B	A	B	X	A	B	A	A	B	B	A	A	B	B	X	B	B	B	A	B	A	X	A	A	A	A	X	A	A	B	B	B	A
AX-109043473	19	91.477	X	B	A	A	A	A	A	A	B	B	A	B	B	A	B	A	B	B	A	B	A	A	B	B	A	A	B	B	X	B	B	B	A	B	A	X	A	A	A	A	A	A	A	B	B	B	A
AX-109473691	19	92.365	B	B	A	A	A	A	A	A	B	B	A	B	B	A	B	A	B	B	A	B	A	A	B	B	X	A	B	B	B	B	B	B	A	B	A	X	A	A	B	A	A	A	A	B	B	B	A
AX-109903792	19	94.173	X	B	A	B	A	A	A	A	B	B	X	B	B	A	B	A	B	B	A	B	A	A	B	B	X	A	B	B	B	B	B	B	A	B	A	B	A	A	B	A	X	B	A	B	B	B	A
AX-111625771	19	94.776	B	B	A	A	A	A	A	A	B	B	A	B	B	A	B	A	B	B	A	B	A	A	B	B	A	A	B	B	B	B	B	B	A	B	A	X	A	A	B	A	A	B	A	B	B	B	A
AX-108752076	19	95.471	B	B	A	A	A	A	A	A	B	B	A	A	X	A	B	A	B	B	A	B	A	A	B	B	X	A	B	B	X	B	B	B	A	B	A	X	A	A	B	A	X	B	A	B	B	X	A
AX-108958961	19	95.696	B	B	X	X	A	B	B	A	B	B	X	A	A	B	X	X	B	B	A	B	A	B	A	A	B	B	B	B	A	A	B	A	B	A	B	B	B	A	B	A	X	B	A	B	A	B	A
AX-110516759	19	95.924	X	B	A	A	A	A	A	A	B	B	A	A	X	A	B	A	B	B	A	B	A	A	B	B	X	A	B	B	B	B	B	B	A	B	A	X	A	A	A	A	A	B	A	B	B	X	A
AX-111582209	19	96.068	B	B	X	X	A	B	B	A	B	B	X	A	A	B	X	A	B	B	A	B	A	B	A	A	B	B	B	X	A	A	B	B	B	A	B	B	B	A	B	A	X	B	A	X	A	B	A
AX-109832507	19	96.462	X	B	A	A	A	A	A	A	B	B	A	A	X	A	B	A	B	B	A	B	A	A	B	B	X	A	B	X	X	B	B	B	A	B	A	X	A	A	A	A	A	B	A	B	B	X	A
AX-111031978	19	98.425	X	B	A	A	A	A	A	A	B	B	A	A	X	A	B	A	B	B	X	B	A	A	B	B	X	A	B	X	X	B	B	B	A	B	A	X	B	A	A	A	A	B	A	B	B	X	A
AX-110408635	19	99.126	B	B	A	A	B	A	A	A	B	B	A	A	A	A	B	A	B	B	A	B	A	A	B	B	A	A	B	X	X	B	B	B	A	B	A	X	B	A	A	A	A	B	A	B	B	A	A
AX-110540105	19	99.714	B	B	A	A	B	A	A	A	B	B	A	A	A	A	B	X	B	B	A	B	A	A	B	B	X	A	B	B	X	B	B	B	A	B	A	X	B	A	A	A	A	B	A	B	B	X	A
AX-111659426	19	100.003	B	B	X	X	A	B	B	A	B	B	X	A	A	B	A	A	B	B	A	B	A	B	A	A	B	B	B	B	A	A	B	B	B	A	B	B	B	A	B	A	X	B	A	B	A	B	A
AX-109357532	19	100.23	B	B	A	A	B	A	A	A	B	B	A	A	A	A	B	A	B	B	X	B	A	A	B	B	A	A	B	B	X	B	B	B	A	B	A	X	B	A	A	A	A	B	A	B	B	A	A
AX-110991918	19	100.751	B	B	A	A	B	A	A	A	B	B	A	X	A	A	B	X	B	B	X	B	A	A	B	B	X	A	B	B	X	B	B	A	A	B	A	X	B	A	A	A	A	B	A	B	B	X	A
AX-108812217	19	101.297	B	B	A	A	B	A	A	A	B	B	A	A	A	A	B	A	B	B	A	B	A	A	B	B	X	A	B	B	X	B	B	A	A	B	A	X	B	A	A	A	A	B	A	B	B	X	A
AX-109417084	19	101.329	B	B	X	A	A	A	A	A	B	B	A	A	X	A	B	A	B	B	B	B	A	A	B	B	X	A	B	X	B	B	B	B	A	B	A	X	B	A	B	A	A	B	A	B	B	X	A
AX-109869975	19	101.663	B	B	X	X	A	B	A	A	B	B	A	A	A	B	A	X	B	B	A	B	A	B	X	A	B	B	B	B	A	A	B	A	B	X	B	B	B	A	B	A	X	B	A	B	B	B	A
AX-109287019	19	101.955	B	B	X	X	A	B	A	A	B	B	X	A	A	B	A	A	B	B	A	B	A	B	B	A	B	B	B	X	A	A	B	B	B	A	B	B	B	A	B	A	X	B	A	X	B	B	A
AX-111493620	19	102.276	B	B	X	X	A	B	B	A	B	B	X	A	A	B	A	X	B	B	A	B	A	B	B	A	B	B	B	B	A	A	B	B	B	A	B	B	B	A	B	A	X	B	A	B	B	B	A
AX-109391797	19	103.027	B	B	X	X	A	B	B	A	B	B	A	A	A	B	A	A	B	B	A	B	A	B	A	A	B	A	B	B	A	A	B	B	B	A	B	B	B	A	A	X	X	B	A	B	A	B	A
AX-111539631	19	103.827	B	B	A	A	B	A	A	A	B	B	A	A	A	A	B	A	B	B	A	B	A	A	B	B	A	A	B	B	X	B	B	A	A	A	A	X	B	A	A	A	B	B	A	B	B	A	A
AX-110481831	19	104.052	B	B	X	X	A	B	B	A	B	B	X	A	A	B	A	A	B	B	A	B	A	B	B	A	B	A	B	B	A	A	B	B	B	X	B	B	B	A	A	A	X	B	A	B	B	B	A
AX-111659846	19	114.078	B	B	A	X	A	A	A	A	B	B	A	X	A	A	B	A	B	X	A	B	A	A	B	B	A	X	B	B	A	B	B	A	A	A	B	B	B	A	A	A	B	B	A	X	A	B	A
AX-109892640	19	114.418	B	B	B	A	A	A	A	A	B	B	X	X	A	A	B	X	B	B	A	B	A	B	B	A	A	A	B	B	A	B	B	A	A	A	B	B	B	A	A	A	X	B	A	B	B	A	A
AX-108797320	19	116.564	B	B	A	A	A	A	A	A	B	B	A	X	A	A	B	X	B	X	A	B	A	B	B	A	A	A	B	B	A	B	B	A	A	A	B	B	B	A	A	A	B	B	A	B	A	A	A
AX-108826057	19	116.8	B	B	A	A	A	A	A	A	B	B	A	X	A	A	B	X	B	A	A	B	A	B	B	A	A	A	B	B	A	B	B	A	A	A	B	B	B	A	A	A	B	B	A	B	A	A	A
AX-111756659	19	117.468	B	B	A	A	A	A	A	A	B	B	A	X	A	A	B	X	B	X	A	B	A	B	B	A	A	X	B	B	A	B	B	A	A	A	B	B	B	A	X	A	B	B	A	B	A	A	A
AX-111063800	19	118.614	B	B	A	A	A	A	A	A	B	B	A	A	A	A	B	B	B	A	A	B	A	B	B	A	A	X	B	B	A	B	B	A	A	A	B	B	B	A	X	A	B	B	A	X	A	A	A
AX-111585581	19	121.356	B	B	A	A	A	A	A	A	B	B	A	X	A	A	B	B	B	X	A	B	A	A	B	B	A	A	B	X	A	B	B	A	A	A	B	B	X	A	B	A	B	B	A	B	A	B	A
AX-111670121	19	124.978	B	B	A	A	B	A	A	A	B	B	A	B	A	A	B	B	B	X	B	B	A	A	B	B	A	A	B	B	A	X	B	A	A	A	B	B	B	A	B	A	B	B	A	B	A	B	A
AX-110438013	20	0	X	A	A	A	B	B	A	X	A	B	B	B	A	A	A	X	B	X	B	A	B	B	B	X	X	B	X	A	A	A	A	B	A	B	B	B	B	A	B	A	B	A	B	B	B	A	A
AX-111450645	20	1.222	A	A	A	A	B	B	A	X	A	B	B	B	A	A	A	A	B	X	B	A	B	B	B	X	X	B	X	A	A	A	A	B	X	B	B	B	B	A	B	A	B	A	B	B	A	A	B
AX-109407777	20	5.241	A	A	A	A	B	B	A	X	A	B	B	B	A	A	A	X	B	X	B	A	B	B	B	A	X	B	A	A	A	X	A	B	A	B	A	B	B	A	B	A	B	A	B	X	A	B	B
AX-110397140	20	5.659	A	A	A	A	B	B	A	A	A	B	B	B	X	A	A	X	B	X	B	B	B	B	B	A	X	B	A	A	A	B	A	B	A	B	A	B	B	A	B	A	B	A	B	B	A	B	B
AX-108979749	20	7.121	A	A	A	A	B	B	A	A	A	B	B	B	X	A	A	X	B	X	B	B	B	B	B	A	X	B	A	A	B	B	A	B	A	B	A	X	B	X	B	A	B	A	B	B	A	B	B
AX-110953411	20	7.898	A	A	A	X	B	B	A	A	A	B	B	B	X	A	A	X	B	X	B	B	B	B	B	A	X	B	A	A	B	B	A	B	X	B	A	B	B	B	B	A	B	A	B	B	A	B	B
AX-109412137	20	9.033	A	B	A	A	B	B	A	A	A	B	B	B	B	A	A	X	B	X	B	B	B	B	B	A	A	B	A	A	B	B	A	B	A	B	A	X	B	X	B	A	B	A	B	X	A	B	B
AX-111555191	20	12.092	A	B	A	A	B	B	A	A	A	B	B	B	B	A	A	A	B	X	B	B	B	B	B	B	X	B	A	A	B	B	A	B	A	B	A	B	B	B	B	B	B	A	B	B	A	B	B
AX-110991982	20	12.359	A	B	A	A	B	B	A	A	A	B	B	B	B	A	A	A	B	X	B	B	B	B	B	A	X	B	A	A	B	B	A	B	X	B	A	B	B	B	B	B	B	A	B	B	A	B	B
AX-108889714	20	13.399	A	B	A	A	B	B	A	A	A	B	B	B	B	A	A	A	B	X	B	B	B	B	B	A	X	B	A	A	B	A	A	B	A	B	A	B	B	B	B	B	B	A	B	B	A	B	B
AX-110087763	20	15.311	A	B	A	A	B	B	A	X	A	B	B	A	B	A	A	B	B	X	B	B	B	B	B	A	A	B	A	A	B	A	A	B	A	B	A	B	B	B	B	B	B	A	B	X	A	B	B
AX-109278740	20	15.588	A	B	A	A	B	B	A	B	A	B	B	A	B	A	A	A	B	X	B	B	B	B	B	A	A	B	A	A	B	A	A	B	A	B	A	B	B	B	B	B	B	A	B	B	A	B	B
AX-89388769	20	19.984	A	B	A	X	B	B	A	X	A	B	B	A	B	A	A	A	B	X	B	B	B	B	B	A	A	B	A	A	B	A	A	B	B	B	A	B	B	B	B	B	B	A	B	X	A	B	B
AX-109965440	20	20.472	A	B	A	X	B	B	A	B	A	B	B	A	B	A	A	A	B	X	B	B	B	B	X	A	X	B	A	A	B	A	A	B	B	B	A	X	B	B	B	B	B	A	B	X	A	B	B
AX-110933769	20	23.329	A	B	A	X	A	B	A	B	A	B	B	X	B	A	A	A	B	B	B	B	B	B	B	A	B	B	A	A	B	A	A	B	B	B	A	B	B	B	B	B	B	A	B	B	A	B	B
AX-109908635	20	30.158	A	B	A	X	A	B	A	B	A	A	B	B	B	A	A	A	B	X	B	B	A	B	B	A	B	B	A	X	B	A	A	B	B	X	A	X	B	B	B	B	B	A	X	A	A	B	B
AX-110460118	20	32.343	A	B	A	B	A	B	A	B	A	A	B	B	B	A	A	A	B	X	B	B	A	B	B	A	B	B	A	B	B	A	A	B	B	X	A	B	B	B	B	B	B	A	X	X	A	B	B
AX-109966064	20	33.996	X	B	A	X	A	B	A	B	A	A	B	B	B	A	A	A	B	X	B	B	A	B	A	A	B	B	A	B	A	A	A	B	B	X	A	B	B	B	B	B	B	A	X	X	A	B	B
AX-111195772	20	34.268	A	B	A	B	A	B	A	B	A	A	B	B	B	A	A	A	B	X	B	B	A	B	A	A	B	B	A	B	A	A	A	B	B	X	A	B	B	B	B	B	B	A	X	X	A	B	B
AX-111015378	20	35.515	A	B	A	B	A	B	A	B	A	A	B	B	B	A	A	A	B	X	B	B	A	B	A	A	B	B	A	B	A	A	A	B	B	X	A	B	B	B	B	B	B	A	X	A	A	B	B
AX-108759988	20	35.836	A	B	A	X	A	B	A	B	A	A	B	B	B	A	A	A	B	X	B	B	A	B	A	A	B	B	A	B	A	A	A	B	B	X	A	B	B	B	B	B	B	A	X	X	A	A	B
AX-109540827	20	36.597	A	B	A	X	A	B	A	B	A	A	B	B	B	A	A	A	B	X	B	B	A	B	A	A	B	B	A	B	A	A	A	B	B	X	A	B	B	B	A	B	B	A	X	A	A	A	A
AX-110985363	20	36.996	A	B	A	X	A	B	A	B	A	A	B	B	B	A	A	A	B	X	B	B	A	B	A	A	B	B	A	B	A	A	A	B	B	X	A	B	B	B	A	B	B	A	X	A	A	A	A
AX-110420313	20	37.107	A	B	A	X	A	B	A	B	A	A	B	B	B	A	A	A	B	X	B	B	A	B	A	A	B	B	A	B	A	A	A	B	B	X	A	B	B	B	A	B	B	A	X	A	A	B	A
AX-108912907	20	37.645	A	B	A	X	A	B	A	B	A	A	B	B	B	A	A	A	B	X	B	B	A	B	A	A	B	B	A	B	A	A	A	B	B	X	A	B	B	B	A	B	B	A	X	A	A	B	A
AX-86163952	20	37.835	A	B	A	X	A	B	A	B	A	A	B	B	B	A	A	A	B	X	B	B	A	B	B	A	B	B	A	B	A	A	A	B	B	X	A	B	B	B	A	B	B	A	X	A	A	B	A
AX-111013642	20	37.968	A	B	A	X	A	B	A	B	A	A	B	X	B	A	A	A	B	X	B	B	A	B	B	A	B	B	A	B	A	A	A	B	B	X	A	B	B	B	A	B	B	A	B	X	A	B	A
AX-109923299	20	38.204	A	B	A	X	A	B	A	B	A	A	B	B	B	A	A	A	B	X	B	B	A	B	B	A	B	B	A	B	A	A	A	B	B	X	A	B	B	B	A	B	B	A	X	A	A	B	A
AX-109505348	20	43.237	A	B	X	B	A	B	A	X	A	A	B	B	B	A	A	A	A	X	B	B	A	B	A	A	A	B	A	B	A	A	A	A	A	X	A	B	B	B	A	B	B	A	X	A	A	A	A
AX-111615007	20	44.748	A	B	X	X	A	B	A	X	A	A	B	B	B	A	A	A	A	X	B	B	A	B	A	A	A	B	A	B	A	A	A	A	A	X	A	B	B	B	A	B	B	A	X	X	A	A	A
AX-108740092	20	46.292	A	B	X	X	A	B	A	X	A	A	B	B	B	A	A	A	A	X	B	B	A	B	A	A	A	B	A	B	A	A	A	A	A	X	A	B	B	B	B	B	B	A	X	A	A	A	B
AX-108936642	20	46.633	A	B	X	X	A	B	A	X	A	A	B	B	B	A	A	A	A	X	B	B	A	B	A	A	A	B	A	B	A	A	A	A	A	X	A	B	B	B	B	B	B	A	X	A	A	A	B
AX-108924545	20	48.423	X	B	X	X	A	B	A	X	A	A	B	B	B	A	A	A	B	A	B	B	A	B	B	A	A	B	A	B	A	A	A	A	A	X	A	B	B	B	B	B	B	A	A	X	A	A	B
AX-108912337	20	48.622	X	B	X	X	A	B	A	X	A	A	B	X	B	A	A	A	B	A	B	B	X	B	B	A	A	B	A	B	A	A	A	A	A	X	A	B	B	B	B	B	B	A	A	X	A	A	B
AX-109872568	20	53.963	X	B	X	X	A	B	A	X	B	A	B	B	X	A	B	X	B	A	A	B	A	B	B	A	A	B	A	B	A	A	A	A	A	X	A	B	B	B	B	B	B	A	A	A	A	B	B
AX-94452927	20	54.698	X	B	B	X	A	B	A	X	A	A	B	B	X	A	B	X	B	A	A	B	A	B	A	A	A	B	A	B	A	A	A	A	A	X	A	B	B	B	B	B	B	A	A	X	A	B	B
AX-109908023	20	55.29	A	B	B	A	A	B	A	X	B	A	B	B	A	A	B	A	B	A	A	B	A	B	A	A	A	B	A	B	A	A	A	A	A	X	A	B	B	B	B	B	B	A	A	A	A	B	B
AX-108983521	20	56.162	X	B	B	X	A	B	A	X	A	A	B	B	A	A	B	A	B	A	A	B	A	B	A	A	A	B	A	B	A	X	A	A	A	X	A	B	B	B	B	B	B	A	A	A	A	B	B
AX-110061645	20	56.787	X	B	B	B	A	B	A	X	A	A	B	B	A	A	B	X	B	A	A	B	A	B	A	A	A	B	A	B	A	X	A	A	A	X	A	B	B	B	B	B	B	A	A	X	A	B	B
AX-110688927	20	57.441	X	B	B	X	A	B	A	X	A	A	B	B	A	A	B	A	B	A	A	B	A	B	A	A	A	B	A	B	A	X	A	A	A	X	A	B	B	B	B	B	B	A	A	X	A	B	B
AX-111672324	20	58.087	X	B	B	B	A	B	A	A	A	A	B	B	A	A	B	A	B	A	A	A	A	B	A	A	A	B	A	B	A	X	A	A	A	A	A	B	B	B	B	B	B	A	A	X	A	B	B
AX-110578876	20	60.532	X	B	B	X	A	B	A	A	A	A	B	B	A	A	B	A	B	A	A	A	A	B	A	A	A	B	A	B	X	X	A	A	A	B	A	A	B	B	A	B	B	A	A	A	A	B	A
AX-89600040	20	60.81	X	B	B	X	A	B	A	A	A	A	B	B	A	A	B	A	B	A	A	A	A	B	A	A	A	B	A	B	X	X	A	A	A	B	A	A	B	B	A	B	B	A	A	A	A	B	A
AX-111006102	20	61.252	X	B	B	X	A	B	A	A	A	A	B	B	A	A	B	A	B	A	A	A	A	B	A	A	A	B	A	B	A	X	A	A	A	B	A	A	B	B	B	B	B	A	A	A	A	B	B
AX-108757223	20	61.408	X	B	B	A	A	B	A	A	A	A	B	B	A	A	B	X	B	A	A	A	A	B	A	A	A	B	A	B	A	X	A	A	A	X	A	A	B	B	B	B	B	A	A	A	A	B	B
AX-111563045	20	61.412	X	B	B	X	A	B	A	A	A	A	B	B	A	A	B	X	B	A	A	A	A	B	A	A	A	B	A	B	A	X	A	A	A	X	A	B	B	B	B	B	B	A	A	X	A	B	B
AX-108749594	20	61.434	X	B	B	X	A	B	A	A	A	A	B	B	A	A	B	A	B	A	A	A	A	B	A	A	A	B	A	B	A	X	A	A	A	X	A	B	B	B	B	B	B	A	A	A	A	B	B
AX-86184028	20	65.679	X	B	X	X	A	B	A	A	B	A	B	B	A	A	B	A	B	A	A	A	A	B	A	A	A	B	X	B	X	X	A	A	A	B	A	A	B	B	A	B	B	A	A	A	A	B	A
AX-108908967	20	67.976	X	B	A	X	A	B	A	A	B	A	B	B	A	A	B	A	B	A	A	A	A	B	A	A	A	B	X	B	X	X	A	A	A	B	A	A	B	B	A	B	B	A	A	B	A	B	A
AX-109438053	20	70.653	B	B	A	X	A	B	A	X	B	A	B	B	B	A	B	X	B	A	A	A	A	B	A	A	A	B	B	X	A	X	A	A	X	B	A	B	B	B	A	B	A	A	A	X	A	B	X
AX-108779895	20	74.182	A	B	A	X	A	B	A	X	B	A	B	B	B	A	B	A	B	A	A	A	A	B	A	A	A	B	A	X	A	X	A	A	A	B	A	B	B	B	B	B	A	A	X	X	A	B	B
AX-109432492	20	78.032	A	B	A	X	A	B	A	B	B	A	B	B	X	X	B	A	A	A	A	A	A	B	A	A	A	B	B	A	A	B	A	A	X	B	A	B	B	B	A	A	A	A	A	B	A	B	A
AX-108861535	20	78.444	A	B	A	X	A	B	A	X	B	A	X	B	A	A	B	A	A	A	A	A	A	B	A	A	A	B	B	A	B	X	A	A	X	B	A	X	B	B	A	A	A	A	A	X	A	B	A
AX-110390771	20	78.728	A	B	A	X	A	B	A	X	B	A	X	B	A	A	B	A	A	A	A	A	A	B	A	A	A	B	B	A	B	X	A	A	A	B	A	B	B	B	A	A	A	A	A	X	A	B	A
AX-110592868	20	79.188	A	B	A	X	A	B	A	X	B	A	X	B	X	A	B	A	A	A	A	A	B	B	A	A	A	B	B	A	A	X	A	A	A	B	A	B	B	B	A	B	A	A	A	B	A	B	B
AX-110360149	20	79.498	A	B	A	X	A	B	A	B	B	A	X	B	X	A	B	A	A	A	A	A	A	B	A	A	A	B	B	A	A	X	A	A	X	B	A	B	B	B	A	B	A	A	A	B	A	B	B
AX-111487758	20	79.62	A	B	A	X	A	X	A	X	B	A	X	B	A	A	B	A	A	A	A	A	A	B	A	A	A	B	B	A	A	X	A	A	A	B	A	B	B	B	A	B	A	A	A	B	A	B	B
AX-109051509	20	79.876	A	B	A	X	A	B	A	X	B	A	X	B	A	A	B	A	B	A	A	A	A	B	A	A	A	B	X	X	A	X	A	A	X	B	A	B	B	B	A	X	A	A	A	B	A	B	B
AX-109295183	20	80.539	A	B	A	X	A	B	A	B	B	A	X	B	A	A	B	A	A	A	A	A	A	B	A	A	A	B	X	X	A	X	A	A	X	B	A	B	B	B	A	X	A	A	A	B	A	B	B
AX-110437442	20	80.654	A	B	A	X	A	B	A	X	B	A	X	B	A	A	B	A	B	A	A	A	A	B	A	A	A	B	X	A	A	X	A	A	A	X	A	B	B	B	A	B	A	A	A	B	A	B	B
AX-110961784	20	81.496	A	B	A	X	A	B	A	X	B	A	X	B	X	A	B	A	B	A	A	A	A	B	A	A	A	B	X	A	A	X	A	A	A	B	A	B	B	B	X	X	A	A	A	X	A	B	B
AX-110537865	20	81.633	A	B	A	X	A	B	A	X	B	A	B	B	B	A	B	A	B	A	A	A	A	B	A	A	A	B	A	A	A	X	A	A	A	B	A	B	B	B	B	X	A	A	X	X	A	B	B
AX-110004319	20	82.25	A	B	A	X	A	B	A	X	B	A	X	B	A	A	B	X	B	A	A	A	A	B	A	A	A	B	X	A	A	X	A	A	A	B	A	B	B	B	B	B	A	A	A	X	A	B	B
AX-110961489	20	82.78	A	B	A	X	A	B	A	X	B	A	X	B	A	A	B	A	B	A	A	A	A	B	A	A	A	B	X	A	A	X	A	A	X	B	A	B	B	B	B	X	A	A	A	X	A	B	B
AX-109849135	20	83.541	A	B	A	X	A	B	A	X	B	A	B	B	A	A	B	A	B	A	A	A	A	B	A	A	A	B	X	A	A	X	A	A	A	B	A	B	B	B	B	X	A	A	A	X	A	B	B
AX-109845294	20	83.672	A	B	A	A	A	B	A	A	B	A	A	B	A	A	B	A	A	A	A	A	A	B	A	A	A	B	A	A	A	A	A	A	A	X	A	X	B	B	B	X	A	A	A	X	A	B	B
AX-89320348	20	84.239	A	B	A	X	A	B	A	X	B	A	X	B	A	A	B	X	A	A	A	A	A	B	A	A	A	B	B	A	A	X	A	A	A	B	A	B	B	B	B	X	A	A	A	B	A	B	B
AX-111100614	20	84.796	A	B	A	A	A	B	A	X	B	A	A	B	A	A	B	A	A	A	A	A	A	B	A	A	A	B	B	A	A	X	A	A	A	X	A	X	B	B	B	A	A	A	A	X	A	B	B
AX-110557060	20	85.015	A	B	A	X	A	B	A	B	B	A	X	B	A	A	B	X	A	A	A	A	A	B	A	A	A	B	B	A	A	X	A	A	A	B	A	B	B	B	B	A	A	A	A	X	A	B	B
AX-108846186	20	85.33	A	B	A	X	A	B	A	X	B	A	X	B	A	A	B	X	A	A	A	A	A	B	A	A	A	B	B	A	A	X	A	A	A	B	A	X	B	B	B	A	A	A	A	X	A	B	B
AX-94429568	20	86.36	B	B	A	X	A	B	A	B	B	A	X	X	A	A	B	A	A	A	A	A	A	B	A	A	A	B	B	A	A	X	A	A	X	B	A	B	B	B	B	A	A	A	A	B	A	B	B
AX-109918671	20	88.142	B	B	A	X	A	B	A	X	B	A	X	B	A	A	B	X	A	A	A	A	A	B	A	A	A	B	B	X	B	X	A	A	A	B	A	B	B	B	B	A	A	A	A	B	A	B	B
AX-108796946	20	89.011	X	B	A	X	A	B	A	X	B	A	X	B	A	A	B	X	A	A	A	A	A	B	A	A	A	B	B	A	B	X	A	A	A	B	A	B	B	B	B	A	A	A	A	X	B	B	B
AX-110692523	20	89.533	B	X	A	X	A	B	A	X	B	A	A	B	A	A	X	A	A	A	A	A	A	B	A	A	A	B	B	X	B	X	A	A	X	B	A	B	B	X	B	A	A	A	A	B	B	B	B
AX-111526667	20	89.87	X	B	A	X	X	B	A	X	B	A	A	B	A	A	B	X	A	A	A	A	A	B	X	X	A	B	A	A	B	X	A	A	A	B	X	B	B	B	B	A	A	A	A	B	B	B	B
AX-108762309	20	90.498	B	B	A	X	X	B	A	X	B	A	X	B	A	A	B	X	A	A	A	A	A	B	A	B	A	B	A	A	B	X	A	A	X	B	A	B	B	B	B	A	A	A	A	B	B	B	B
AX-111681168	20	90.907	X	B	X	X	A	B	A	X	B	A	X	B	A	A	B	A	A	A	B	A	A	B	A	A	A	B	A	X	B	A	A	A	A	B	A	B	B	B	B	A	A	A	A	X	B	B	B
AX-108981864	20	91.557	B	B	X	X	A	B	A	B	B	A	X	B	A	A	B	X	A	A	B	A	A	B	A	B	A	B	A	A	B	X	A	A	A	B	A	B	B	B	B	A	A	A	A	X	B	B	B
AX-94525975	20	91.731	B	B	X	X	A	B	A	X	B	A	X	B	A	A	B	A	A	A	B	A	A	B	A	B	A	B	A	X	B	X	A	A	X	B	A	B	B	B	B	A	A	A	A	B	B	B	B
AX-109300058	20	91.989	X	B	X	X	A	B	A	B	B	A	X	B	A	A	B	X	A	A	B	A	A	B	A	A	A	B	A	X	B	X	A	A	A	B	A	B	B	B	B	A	A	A	A	B	B	B	B
AX-111537015	20	95.362	X	B	B	X	X	B	A	A	B	A	X	A	A	A	B	A	A	A	B	A	A	B	A	A	A	B	A	X	A	A	A	A	A	B	A	B	B	B	B	B	A	A	A	B	A	B	B
AX-108789197	20	96.07	X	B	B	X	X	B	A	A	B	A	X	A	A	A	B	X	A	A	B	A	A	B	A	A	A	B	A	X	A	A	A	A	A	B	A	B	B	B	B	B	A	A	A	B	A	B	B
AX-111606762	20	107.304	A	A	B	X	A	B	A	A	B	B	A	A	A	B	B	B	A	A	B	A	A	X	A	A	A	A	A	B	A	X	A	A	B	X	A	B	B	B	A	B	B	A	A	B	A	X	A
AX-109461245	20	108.447	A	A	B	X	A	B	A	A	B	B	A	A	X	B	B	X	A	A	B	A	A	X	A	A	A	A	A	X	A	X	A	A	B	X	A	B	B	B	A	B	B	A	A	X	A	X	A
AX-94537587	20	110.425	A	A	X	X	A	B	A	A	B	B	A	A	X	B	B	B	A	A	B	A	A	X	A	A	A	A	A	B	A	X	A	A	B	X	A	B	B	B	B	B	B	A	A	B	A	X	B
AX-111699424	20	111.93	A	A	B	X	X	B	A	A	B	B	X	A	A	B	B	B	A	A	X	A	A	X	A	A	A	A	A	B	A	X	A	A	B	B	A	B	X	B	B	B	A	A	A	B	A	X	B
AX-108787760	20	112.319	A	A	B	X	X	B	A	A	B	B	X	A	A	B	B	B	A	A	X	A	A	X	A	A	A	A	A	X	A	X	A	A	B	B	A	B	X	B	B	B	A	A	A	B	A	X	B
AX-89364680	20	113.286	A	A	X	X	X	B	A	A	B	B	X	A	B	B	B	B	A	A	X	A	A	X	B	A	A	A	A	B	A	X	A	A	B	X	A	B	X	B	B	B	A	A	A	X	A	X	B
AX-109922088	20	113.304	A	A	X	X	X	B	A	A	B	B	X	A	X	B	B	B	A	A	X	A	A	X	A	A	A	A	A	B	A	X	A	A	B	X	A	B	X	B	B	B	A	A	A	B	A	X	B
AX-108758415	20	113.364	A	A	B	X	X	B	A	A	B	B	X	A	A	B	B	B	A	A	X	A	A	X	A	A	A	A	A	X	A	X	A	A	B	X	A	B	X	B	B	B	A	A	A	B	A	X	B
AX-109955661	20	113.449	X	A	B	X	A	B	A	A	B	B	A	A	X	B	B	B	A	A	B	A	A	X	A	A	A	A	A	B	A	X	A	A	B	B	A	B	B	B	B	B	B	A	A	B	A	X	B
AX-108890260	20	113.578	A	A	B	X	A	B	A	A	B	B	A	A	A	B	B	X	A	A	X	A	A	X	A	A	A	A	A	B	A	X	A	A	B	X	A	B	X	B	A	B	A	A	A	B	A	X	A
AX-111013927	20	113.847	A	A	X	X	A	B	A	A	B	B	A	A	A	B	B	X	A	A	X	A	A	X	A	A	A	A	A	X	A	X	A	A	B	X	A	B	X	B	A	B	B	A	A	X	A	X	A
AX-111102830	20	116.213	X	A	X	X	X	B	A	A	B	B	X	A	B	B	B	B	A	A	X	A	A	X	B	A	A	A	A	B	A	X	A	A	B	X	A	B	X	B	B	B	A	A	A	B	A	X	B
AX-108846255	20	116.637	X	A	B	X	X	B	A	A	B	B	X	A	B	B	B	B	A	A	X	A	A	X	B	A	A	A	A	B	A	X	A	A	B	B	A	B	B	B	B	B	A	A	A	B	A	B	B
AX-111036578	20	116.719	X	A	B	X	X	B	A	A	B	B	X	X	X	B	B	B	A	A	B	A	A	X	B	A	A	A	A	B	A	X	A	A	B	B	A	B	B	B	B	B	A	A	A	B	A	B	B
AX-109426608	20	116.834	X	A	B	X	X	B	A	A	B	B	X	A	B	B	B	B	A	A	X	A	A	X	B	A	A	A	A	B	A	X	A	A	B	B	A	B	B	B	B	B	A	A	A	B	A	X	B
AX-109822894	20	121.938	A	A	X	X	X	B	A	A	B	B	X	A	B	B	B	B	A	A	B	A	A	X	B	A	A	A	A	B	A	X	A	A	B	B	A	B	A	B	A	B	A	A	A	B	A	X	A
AX-95658405	20	124.638	A	A	X	A	B	A	A	A	B	B	X	A	B	B	B	B	A	A	A	A	A	X	B	A	A	A	A	B	A	X	A	A	B	B	A	B	A	B	B	B	A	A	A	B	A	B	B
AX-108869330	20	125.382	A	A	X	A	B	A	A	A	B	B	X	A	B	B	B	B	A	A	A	A	A	X	B	A	A	A	A	B	A	X	A	A	B	B	A	B	A	B	A	B	A	A	A	B	A	X	A
AX-110078084	20	125.748	X	A	X	A	B	A	A	A	B	B	X	A	B	B	B	B	A	A	A	A	A	X	B	A	A	A	A	B	A	X	A	A	B	X	A	B	A	B	A	B	A	A	A	B	A	X	A
AX-89556194	20	127.226	A	A	X	A	B	A	A	A	B	B	X	A	B	B	B	B	A	A	A	A	A	X	B	A	A	A	A	B	A	X	A	A	B	X	A	B	A	B	A	B	A	A	A	B	A	X	A
AX-111720877	20	131.775	X	A	X	A	B	A	B	A	B	B	X	A	B	X	B	B	A	A	A	A	A	B	B	B	A	B	A	B	A	X	A	A	B	X	A	B	X	B	B	B	A	A	A	X	A	X	B
AX-108901488	20	132.765	A	A	X	A	B	A	B	A	B	B	X	A	B	X	B	B	A	A	A	A	A	B	X	B	A	B	A	B	A	X	A	A	B	X	A	X	A	B	A	B	A	A	A	X	A	X	A
AX-109371862	20	133.562	X	A	X	A	B	A	B	A	B	B	B	A	B	X	B	X	A	A	A	A	A	B	B	B	A	B	A	B	A	X	B	A	B	X	A	B	A	B	A	B	A	A	A	X	A	X	A
AX-110927936	20	134.745	A	A	X	A	B	A	B	A	B	B	X	A	B	X	B	A	B	A	A	A	A	X	B	B	A	B	A	B	A	X	B	A	B	X	A	B	A	B	A	B	A	A	A	X	A	A	A
AX-86178207	20	135.897	A	A	X	A	B	A	B	A	B	B	X	A	B	X	B	B	B	A	A	A	A	B	A	B	A	B	A	B	A	A	B	A	B	X	A	B	A	B	B	B	A	A	A	B	A	X	B
AX-111553473	20	137.185	A	A	X	A	B	A	B	B	B	B	X	A	B	X	B	A	B	A	A	A	A	B	A	B	A	B	A	B	A	A	B	A	B	X	A	B	A	B	A	B	A	A	A	B	A	A	A
AX-109976283	20	138.013	A	A	X	A	B	A	B	B	B	B	X	A	B	X	B	A	B	A	A	A	A	B	A	B	A	B	A	B	A	A	B	A	B	X	A	B	A	B	A	B	A	A	A	B	A	X	A
AX-109399920	20	139.434	A	A	X	A	B	A	B	B	B	B	X	A	B	X	B	B	B	A	A	A	A	B	A	B	A	B	A	B	A	A	B	A	B	X	A	B	A	B	B	B	A	A	A	X	A	A	B
AX-89318179	20	142.68	A	A	X	A	B	A	B	B	B	B	X	A	B	X	A	B	B	B	A	A	A	B	A	A	A	B	A	B	A	A	B	A	B	X	A	B	A	B	B	B	A	A	A	X	A	A	B
AX-110366783	20	143.61	A	A	X	A	B	A	B	X	B	B	X	A	B	X	A	B	A	B	A	A	A	B	A	A	A	B	A	B	A	A	B	A	B	X	A	B	A	B	B	B	A	A	A	X	A	A	B
AX-108840376	20	144.87	A	A	X	A	B	A	B	X	B	B	X	A	B	B	A	A	A	B	A	A	A	B	A	A	A	X	A	B	A	A	B	A	A	X	A	B	A	B	A	B	A	A	A	B	A	A	A
AX-108806378	20	145.092	A	A	X	A	B	A	B	A	B	B	X	A	B	B	A	X	A	B	A	A	A	B	A	A	A	A	A	B	A	A	B	A	B	A	A	X	A	B	A	B	A	A	A	X	A	A	X
AX-110378235	20	146.077	A	A	X	A	B	A	B	X	B	B	X	A	B	B	A	B	A	B	A	A	A	B	A	A	A	A	A	B	A	A	B	A	B	X	A	B	A	B	B	B	A	A	A	X	A	A	B
AX-109847380	20	146.911	A	A	X	A	B	A	B	X	B	B	X	A	B	B	A	B	A	B	A	A	A	B	A	A	A	X	A	B	A	A	B	B	A	X	A	B	A	B	B	B	A	A	A	X	A	A	B
AX-108819274	20	149.733	A	A	A	A	B	A	B	B	B	B	A	A	B	B	A	A	A	B	A	B	A	B	A	A	A	B	A	B	A	A	B	A	A	A	A	X	B	B	A	B	A	A	A	X	A	B	A
AX-109955495	20	150.41	A	A	X	A	B	A	X	B	B	B	X	A	B	B	A	A	A	B	A	B	A	B	A	A	A	X	A	B	A	A	B	A	A	X	A	B	B	B	A	B	X	A	A	B	A	B	A
AX-109902211	20	150.856	A	A	X	A	B	A	B	B	B	B	B	A	B	B	A	X	A	B	A	B	A	B	A	A	A	B	A	B	A	A	B	A	A	X	A	B	B	B	A	B	X	A	A	X	A	B	A
AX-110908486	20	156.573	A	A	X	A	B	A	B	B	B	B	A	A	B	B	A	B	A	B	A	B	A	B	A	B	A	A	A	B	A	A	B	B	A	A	A	X	B	B	B	B	A	A	A	B	A	B	A
AX-109583510	20	159.196	A	A	X	A	B	A	B	B	B	B	X	A	B	B	A	B	A	B	A	B	A	B	B	B	X	A	A	B	A	A	B	B	A	B	A	B	B	B	B	B	X	A	A	B	A	B	A
AX-109320626	20	159.932	A	A	X	A	B	A	B	B	B	B	X	A	B	B	A	X	A	B	A	B	A	B	X	B	A	A	A	B	A	A	B	B	A	X	A	X	B	B	B	B	X	A	A	B	A	B	A
AX-110916465	20	160.685	A	A	X	A	B	A	B	B	B	B	X	A	B	B	A	B	X	B	A	B	A	B	B	B	X	X	A	B	A	A	B	B	A	X	A	B	B	B	B	B	X	A	A	B	A	B	A
AX-109915196	20	161.127	A	A	X	A	B	A	B	B	B	B	X	A	B	B	A	X	A	B	A	B	A	B	X	B	A	A	A	B	A	A	B	B	A	X	A	X	B	B	B	B	X	A	A	X	A	B	A
AX-110531645	20	161.862	A	A	X	A	B	A	B	B	B	B	X	A	B	B	A	B	X	B	A	B	A	B	B	B	X	A	A	B	X	A	B	B	A	X	A	B	B	B	B	B	X	A	A	B	A	B	A
AX-109963224	20	163.779	A	A	X	A	B	A	B	B	B	B	X	A	B	B	A	X	A	B	A	B	A	B	B	B	X	A	A	B	B	A	B	B	A	A	A	A	B	B	A	B	X	A	A	B	A	B	B
AX-109306591	20	165.682	A	A	X	A	B	A	B	B	B	B	X	A	B	B	A	B	A	B	X	A	A	B	B	B	X	B	X	X	B	A	B	B	A	A	A	A	B	B	B	B	X	A	A	B	A	B	X
AX-108939291	20	166.655	A	A	X	B	B	A	B	B	B	B	X	A	B	B	A	B	A	B	X	A	A	B	B	B	X	A	X	B	B	A	B	B	A	A	A	A	B	B	X	B	X	A	A	B	A	B	B
AX-111668381	20	167.301	A	A	X	B	B	A	B	B	B	B	B	A	B	B	A	B	A	B	B	A	A	B	B	B	X	A	B	B	B	A	B	B	A	A	A	A	B	B	X	B	X	A	A	B	A	B	B
AX-111603588	21	0	X	A	B	X	B	A	B	X	B	B	X	A	A	A	B	A	B	X	B	B	B	B	A	A	B	A	B	X	B	B	B	A	A	A	A	A	A	A	A	A	B	A	B	X	B	B	A
AX-110108491	21	4.558	A	A	B	X	B	A	B	B	B	B	X	A	A	A	B	A	B	X	B	B	B	A	A	A	B	B	B	B	B	B	B	B	A	A	A	A	A	A	A	A	B	A	B	X	B	B	A
AX-111987861	21	6.1049	A	A	B	X	A	A	B	B	B	B	A	A	A	A	B	A	B	X	B	B	B	A	A	A	B	B	B	B	B	B	B	B	A	A	A	A	A	A	A	A	B	A	B	X	B	B	A
AX-109541384	21	6.5904	A	A	B	B	A	A	B	B	A	B	A	A	A	A	B	A	B	X	B	B	B	A	A	A	B	B	B	B	B	B	B	B	A	A	A	A	A	A	A	A	B	A	B	X	B	B	A
AX-109137873	21	15.0022	B	A	A	B	A	A	B	B	A	B	A	A	B	X	B	A	B	X	A	B	X	A	A	B	B	B	A	B	A	X	B	B	A	A	A	A	A	X	A	A	B	A	B	X	A	B	A
AX-109542801	21	15.4924	B	A	A	B	A	A	B	B	A	B	A	A	B	X	B	A	B	X	A	B	X	A	A	B	B	B	X	B	A	B	B	B	A	A	A	A	A	X	A	A	B	A	B	X	A	B	A
AX-109353584	21	23.5871	B	A	X	B	B	A	B	A	A	B	A	A	X	A	B	A	B	X	A	A	A	A	A	B	B	B	A	X	A	B	B	A	A	A	A	A	A	X	B	X	B	A	B	X	A	B	B
AX-111375003	21	26.4638	X	A	X	B	B	A	A	A	A	A	A	A	X	A	B	A	B	X	A	A	A	A	X	B	B	B	A	A	A	X	B	A	A	A	A	A	A	X	B	X	B	A	B	A	A	B	B
AX-111140502	21	30.1743	X	A	X	X	B	A	A	A	A	A	A	A	X	A	B	A	B	X	A	A	A	A	A	B	B	B	A	A	A	X	B	A	B	A	A	X	A	A	B	A	B	A	B	X	A	X	B
AX-89502768	21	32.423	X	A	X	B	B	A	A	A	A	A	A	A	X	A	B	A	B	X	A	A	A	A	A	B	B	B	X	X	A	X	B	A	B	A	A	A	A	A	X	A	B	B	B	X	B	X	B
AX-109196753	21	34.072	X	A	A	B	B	X	A	A	A	A	A	A	B	A	B	A	B	X	A	A	A	A	A	B	B	B	A	A	B	X	B	A	B	A	A	X	A	A	X	A	B	B	B	X	B	A	B
AX-109482720	21	38.8484	X	A	A	X	B	A	A	A	A	A	A	B	B	A	B	X	B	A	B	A	A	A	B	B	B	X	X	B	B	X	B	B	B	A	A	X	A	A	B	A	B	B	B	B	B	A	B
AX-111467006	21	44.1001	A	A	B	X	B	A	A	A	A	X	A	B	X	A	B	A	B	A	B	A	A	A	B	B	B	A	X	A	B	X	B	A	B	X	A	B	A	A	X	A	B	A	B	B	B	A	B
AX-109205685	21	51.5409	A	A	X	B	B	A	B	A	A	A	A	B	X	A	A	A	B	A	B	A	A	A	B	B	B	B	X	B	B	X	B	A	B	X	A	B	A	A	A	A	B	A	X	B	B	A	B
AX-110893224	21	52.5615	A	A	B	B	B	A	B	A	A	A	A	B	B	A	A	A	B	A	B	A	A	A	B	B	B	B	B	X	B	X	B	A	B	B	A	B	A	A	X	A	B	A	B	B	B	A	B
AX-109032311	21	55.2523	A	A	X	B	B	A	B	A	A	A	A	B	B	A	A	A	B	A	B	A	A	A	B	B	B	X	X	X	B	X	A	A	B	X	A	B	A	A	X	A	B	A	X	X	B	A	B
AX-94541307	21	70.2716	X	A	X	B	B	A	A	A	A	A	A	A	A	A	B	A	B	B	B	B	X	A	A	A	B	A	A	X	A	B	A	A	B	X	A	X	A	A	A	A	A	A	A	X	B	B	B
AX-110503493	21	73.686	X	A	X	B	B	A	A	A	A	A	A	A	A	A	B	A	B	B	B	B	X	A	A	A	B	B	A	X	A	B	A	A	B	X	A	B	A	A	X	A	A	B	X	X	B	B	B
AX-109333726	21	74.1962	X	A	X	B	B	A	A	A	A	A	A	A	A	A	B	A	B	B	B	B	X	A	A	A	B	B	A	X	A	B	A	A	B	X	A	B	A	A	X	A	A	B	X	X	B	B	B
AX-110467729	21	82.608	X	A	A	B	B	A	B	A	A	A	A	A	A	A	B	A	B	B	B	B	X	A	A	A	B	X	A	A	A	B	A	B	A	X	A	X	A	A	B	A	A	B	X	X	A	B	B
AX-109379249	21	83.1699	B	A	A	B	B	A	B	A	A	A	X	A	A	A	B	X	B	B	B	B	X	A	A	A	B	A	X	X	A	B	A	B	A	X	A	B	A	A	B	A	A	B	X	B	A	B	B
AX-89737284	21	86.3386	B	A	A	B	B	A	B	A	X	A	A	A	X	A	B	B	B	B	B	B	B	A	A	A	B	X	X	A	A	B	A	B	A	A	A	B	A	A	B	A	A	B	X	A	A	B	B
AX-89378255	21	86.9134	B	A	A	B	B	A	B	A	X	A	A	A	X	A	B	B	A	B	B	B	X	A	A	A	B	B	X	A	A	B	A	B	X	A	A	B	A	A	B	A	A	B	X	X	A	B	B
cssfr5(Yr18)	21	93.9209	B	A	A	A	B	B	B	A	X	A	A	A	B	A	B	B	A	B	B	B	X	A	X	A	B	X	X	A	A	B	A	B	X	A	A	X	A	A	A	B	A	X	A	A	X	A	B
AX-110502471	21	102.444	B	A	A	B	B	A	B	A	A	B	A	A	X	A	B	B	A	B	B	B	A	A	A	B	X	B	A	A	A	B	A	B	B	A	A	B	A	A	B	X	X	B	X	A	A	B	B
AX-109303704	21	104.693	B	A	A	B	B	A	B	A	X	B	A	A	X	A	B	B	A	B	B	B	A	A	A	A	B	B	X	X	X	B	A	B	X	A	A	B	A	A	B	A	A	B	X	X	A	B	B
AX-110431109	21	107.473	B	A	A	B	B	A	B	A	B	B	A	A	X	A	B	B	A	B	B	B	A	A	A	B	X	B	A	X	A	B	A	B	B	A	A	B	A	A	B	A	A	A	X	X	A	B	B
AX-89599861	21	107.978	B	A	A	B	B	A	B	A	B	B	A	A	X	A	B	B	A	B	B	B	A	A	A	B	B	B	X	B	A	B	A	B	B	A	A	B	A	A	B	A	A	A	B	X	A	B	B
AX-110659621	21	111.209	B	A	A	B	B	A	B	A	B	B	A	A	X	A	A	B	A	B	B	B	A	A	A	B	X	B	A	X	A	B	A	B	A	X	A	A	A	A	B	A	A	A	B	X	A	B	B
AX-110981319	21	112.273	B	A	A	B	B	A	B	X	B	B	A	A	X	A	A	B	A	X	B	B	A	A	A	B	X	B	X	A	A	B	A	B	A	X	A	A	A	A	B	A	A	A	B	A	A	B	B
AX-111843581	21	118.939	B	A	A	B	B	B	B	X	B	B	A	A	A	A	A	B	A	X	B	B	X	A	X	A	X	B	B	A	A	B	A	B	A	B	A	A	A	A	B	A	A	A	A	A	A	B	B
AX-108780423	21	121.545	B	A	A	B	B	B	B	B	B	B	A	A	A	A	A	B	A	A	B	B	X	A	A	A	B	A	B	A	A	X	A	B	A	B	A	A	A	A	B	A	A	A	A	A	A	B	B
AX-111713225	21	122.026	B	A	A	B	B	B	B	B	B	B	A	A	A	A	A	B	A	A	B	B	X	A	A	A	B	A	B	A	A	X	A	B	A	B	A	A	A	A	B	A	A	A	A	A	A	B	B
AX-108748734	21	125.838	B	A	X	X	B	B	A	B	B	A	A	X	A	A	A	B	A	A	B	B	X	A	A	A	B	A	B	A	A	A	A	B	A	A	A	A	A	A	B	A	A	A	A	X	A	B	B
AX-111693608	21	127.901	B	A	X	B	B	B	A	B	B	A	A	A	A	A	A	B	A	A	B	B	X	A	A	A	B	A	X	A	A	A	A	B	A	B	A	A	A	A	B	A	A	A	A	A	A	B	A
AX-110061322	21	132.308	B	A	X	B	B	B	A	B	B	B	A	A	A	A	A	B	A	A	B	B	X	A	A	A	B	A	A	A	A	A	A	B	A	X	A	B	A	A	B	A	A	A	A	X	A	B	B
AX-111460570	21	135.609	B	A	X	X	B	B	A	A	B	B	A	A	A	A	B	X	A	A	B	B	A	A	A	A	B	A	X	A	X	A	A	B	A	A	X	B	A	A	B	A	A	A	A	X	A	B	B
AX-111539432	21	136.135	B	A	X	B	B	B	A	B	B	B	A	A	A	A	B	X	A	A	B	B	A	A	A	A	B	A	X	A	A	A	A	B	A	A	A	B	A	A	B	A	A	A	A	X	A	B	B
AX-89629840	21	137.732	B	A	X	X	B	B	A	X	B	B	X	A	A	A	B	X	A	A	B	B	A	A	A	A	B	A	A	A	X	A	A	B	A	A	A	B	A	A	B	A	A	A	A	X	A	B	B
AX-110821707	21	138.237	B	A	X	X	B	B	A	X	B	B	A	A	A	A	B	A	A	A	B	B	A	A	A	A	B	A	A	A	A	A	A	B	A	A	A	B	A	A	B	A	A	A	A	X	A	B	B
AX-89748459	21	139.257	B	A	X	X	A	B	X	X	B	B	X	A	A	A	B	A	A	A	B	B	A	A	A	A	B	A	A	A	A	A	A	B	A	A	A	B	A	A	B	A	A	A	A	X	A	B	B
AX-110377489	21	140.888	B	A	X	X	B	B	A	X	B	B	X	A	A	A	B	A	A	A	B	B	A	A	A	A	B	A	A	A	X	A	A	B	A	A	A	B	A	A	B	A	A	A	A	X	A	B	B
AX-110667549	21	141.432	B	A	X	X	A	B	A	X	B	B	B	A	A	A	B	A	A	A	B	B	A	A	A	A	B	A	A	A	X	A	A	B	A	A	A	B	A	A	B	A	A	A	A	X	A	B	B
AX-110002663	21	142.519	B	A	X	X	A	B	A	X	B	B	B	A	A	A	B	X	A	A	B	B	B	A	A	A	B	A	A	A	X	A	A	B	A	A	A	B	A	A	B	A	A	A	A	X	A	A	B
AX-89512658	21	143.594	B	A	X	X	A	B	A	X	B	B	B	A	A	A	B	X	A	A	B	B	B	A	A	A	B	A	A	A	X	A	A	B	A	A	A	B	A	A	B	A	A	A	A	X	A	B	X
AX-108942812	21	144.658	B	A	X	X	A	B	A	X	B	B	B	A	A	A	B	A	A	A	B	B	B	A	A	A	B	A	A	A	A	A	A	B	A	A	A	B	A	A	B	A	A	A	A	X	A	A	B
AX-111570070	21	145.722	B	A	X	X	A	B	A	X	B	B	B	A	A	A	B	X	A	A	B	B	B	A	A	A	B	A	A	A	A	A	A	B	A	A	A	B	A	A	B	A	A	A	A	X	A	A	B
AX-110633903	21	146.254	B	A	X	X	A	B	A	X	B	B	B	A	A	A	B	X	A	A	B	B	B	A	A	A	B	A	A	A	A	A	A	B	A	A	A	X	A	A	B	A	A	A	A	X	A	A	B
AX-89713293	21	146.786	B	A	X	X	A	B	A	X	B	B	B	A	A	A	B	X	A	A	B	B	B	A	A	A	B	A	A	A	A	A	A	B	A	A	A	B	A	A	B	A	A	A	A	X	A	A	B
AX-110984806	21	147.85	B	A	X	X	B	B	A	X	X	B	B	A	A	A	B	A	A	A	B	B	B	A	A	A	B	A	A	A	A	A	A	B	A	X	A	B	A	A	B	A	A	A	A	X	A	A	B
AX-110418373	21	148.937	B	A	X	X	B	B	A	A	X	B	B	A	A	A	B	A	A	A	B	B	B	A	A	A	B	A	A	X	A	A	A	B	A	A	A	X	A	A	B	A	A	A	A	B	A	X	B
AX-111217133	21	154.128	A	A	X	X	B	B	B	A	X	B	B	A	A	A	B	X	A	A	B	B	B	A	A	A	B	A	A	A	A	A	A	B	A	X	A	B	A	A	A	A	A	A	A	X	A	B	B
AX-109418783	21	155.159	A	A	X	X	B	B	B	A	X	B	B	A	A	A	B	A	A	A	B	B	B	A	A	A	B	A	A	A	A	A	A	B	A	X	A	B	A	A	A	A	A	A	A	X	A	B	B
AX-109728672	21	155.655	A	A	X	X	B	B	B	A	X	B	B	A	A	A	B	A	A	A	B	B	B	A	A	A	B	A	A	A	A	A	A	B	A	X	A	B	A	A	A	A	A	A	A	X	A	B	B
AX-109074930	21	156.665	A	A	X	X	B	B	B	A	A	B	B	A	A	A	B	X	A	A	B	B	B	A	A	A	B	A	X	X	A	A	A	B	A	X	A	B	A	A	A	A	A	A	A	X	A	B	B
AX-109827800	21	157.191	A	A	X	X	B	B	B	A	A	B	B	A	A	A	B	A	A	A	B	B	B	A	A	A	B	A	A	A	A	A	A	B	A	X	A	B	A	A	A	A	A	A	A	X	A	B	B
AX-111691585	21	158.302	A	A	X	X	B	B	B	A	A	B	B	A	A	A	B	A	A	A	B	B	B	A	B	A	B	A	A	A	A	A	A	B	A	A	A	B	A	A	A	A	A	A	A	X	A	B	B
AX-111337913	21	158.834	A	A	X	X	B	X	B	A	A	B	B	A	A	A	B	A	A	A	B	B	B	A	B	A	B	A	X	A	A	A	A	B	A	A	A	B	A	A	A	A	A	A	A	X	A	B	B
AX-89474682	21	160.559	A	A	X	X	B	B	B	A	A	B	X	A	A	A	B	X	A	A	B	B	B	A	B	A	B	A	X	X	A	A	A	B	A	X	A	B	A	A	A	A	A	A	A	X	A	X	B
AX-108895252	21	161.091	A	A	X	X	B	B	B	A	A	B	X	A	A	A	B	X	A	A	B	B	B	A	B	A	B	A	X	X	A	A	A	B	A	A	A	B	A	A	A	A	A	A	A	X	A	X	B
AX-110597684	21	162.112	A	A	X	B	B	B	B	A	A	B	X	A	A	A	B	X	A	A	B	B	B	A	B	A	B	A	A	X	A	A	A	B	A	A	A	B	A	A	A	A	A	A	A	X	A	A	B
AX-109942885	21	163.132	A	A	X	X	B	B	B	A	A	B	X	A	A	A	B	A	A	A	X	B	B	A	B	A	B	A	A	A	A	A	A	B	A	A	A	X	A	A	A	A	A	A	A	A	A	A	B
AX-111665954	21	164.231	A	A	B	B	B	B	B	A	A	B	X	A	A	A	B	X	A	A	B	B	B	A	B	A	B	A	X	X	A	A	A	B	A	A	A	B	A	A	A	A	X	A	A	X	A	X	B
AX-110579501	21	164.769	A	A	X	B	B	B	B	A	A	B	X	A	A	A	B	A	A	A	B	B	B	A	B	A	B	A	X	X	X	A	A	B	A	A	A	B	A	A	A	A	X	A	A	X	A	X	B
AX-111101483	21	167.549	A	A	X	B	B	B	B	A	A	B	B	A	A	A	B	A	A	A	B	B	B	A	B	A	B	A	A	A	X	A	A	B	A	A	A	B	A	A	A	A	X	A	A	X	A	X	B
AX-111922613	21	168.06	A	A	X	B	B	B	B	A	A	B	B	A	A	A	B	A	A	A	X	B	B	A	B	A	B	A	A	X	X	A	A	B	A	A	A	B	A	A	A	A	X	A	A	X	A	X	B
AX-110676782	21	169.656	A	A	X	B	B	B	B	A	B	B	B	A	B	A	B	X	A	A	X	A	B	A	B	A	B	A	A	X	A	A	A	B	A	A	A	B	A	A	A	A	X	A	A	X	A	X	B
AX-109171361	21	170.709	A	A	X	B	B	B	B	A	B	B	B	A	B	A	B	X	A	A	B	A	B	A	B	A	B	A	A	X	A	A	A	B	A	A	A	B	A	A	A	A	X	A	A	X	A	X	B
AX-110026669	21	171.23	A	A	X	B	B	B	B	A	B	B	B	A	B	A	B	X	A	A	X	A	B	A	B	A	B	A	A	X	A	A	A	B	A	A	A	B	A	A	A	A	X	A	A	X	A	X	B
AX-109374178	21	171.75	A	A	X	B	B	B	B	A	B	B	B	A	B	A	B	A	A	A	X	A	B	B	B	A	B	A	A	A	A	A	A	B	A	A	A	B	A	A	A	A	X	A	A	X	A	X	B
AX-109384830	21	172.803	A	A	X	B	B	B	B	A	B	B	B	A	B	A	B	X	A	A	X	A	B	B	B	A	B	A	B	X	A	A	A	B	A	A	A	B	A	A	A	A	X	B	A	X	A	X	B
AX-110509545	21	173.902	A	A	X	B	B	X	B	X	B	B	B	A	B	A	B	A	A	A	B	A	B	B	B	A	B	A	B	A	A	A	A	B	A	A	A	B	A	A	A	A	X	B	A	X	A	A	B
AX-111022995	21	174.934	A	A	X	B	B	B	B	X	B	B	B	A	B	A	B	X	A	A	B	A	B	B	B	A	B	B	B	X	A	A	A	B	A	A	A	B	A	A	A	A	X	B	A	B	A	X	B
AX-109623948	21	176.547	A	A	B	B	B	B	B	X	B	B	B	A	B	A	B	X	A	A	B	A	B	B	B	A	B	B	B	X	A	A	A	B	A	A	A	B	A	A	A	A	X	B	B	B	A	X	B
AX-109345846	21	177.6	A	A	X	B	B	B	B	X	B	B	B	A	B	A	B	X	A	A	B	A	B	B	B	A	B	B	B	X	A	A	B	B	A	A	A	B	A	A	A	A	X	B	B	B	A	X	B
AX-111820217	21	178.132	A	A	B	B	B	B	B	X	B	B	B	A	B	A	B	X	A	A	B	A	B	B	B	A	B	B	B	X	A	A	B	B	A	A	A	B	A	A	A	A	X	B	B	B	A	X	B
AX-110429279	21	180.284	A	A	X	B	B	B	B	X	B	B	B	A	B	A	B	X	A	A	X	A	B	B	B	A	B	B	B	X	A	A	B	B	A	A	A	B	A	A	A	A	X	B	B	X	A	X	B
AX-108745974	21	180.821	A	A	X	B	B	B	B	X	B	B	B	A	B	A	B	X	A	A	B	A	B	B	B	A	B	B	B	X	A	A	B	B	A	A	A	B	A	A	A	A	X	B	B	B	A	X	B
AX-109332089	21	182.546	A	A	X	B	B	B	B	X	B	B	B	A	B	A	B	A	A	A	X	A	B	B	B	A	B	B	B	X	A	A	B	B	A	A	A	B	A	A	A	A	X	B	B	X	A	X	B
AX-111590592	21	183.61	A	A	X	B	B	B	B	B	B	B	B	A	B	A	B	A	A	A	X	A	B	B	B	A	B	B	B	A	A	A	B	B	A	A	A	X	A	A	A	A	X	B	X	X	A	A	B
AX-110078843	21	184.136	A	A	B	B	B	B	B	B	B	B	B	A	B	A	B	X	A	A	B	A	B	B	B	A	B	B	B	A	A	A	B	B	A	A	A	B	A	A	A	A	X	B	B	X	A	X	B
AX-108748467	21	185.189	A	A	X	B	B	B	B	B	B	B	B	A	B	A	B	X	A	A	X	A	B	B	B	A	B	B	B	B	A	A	B	B	A	A	A	B	A	A	A	A	X	B	B	B	A	X	B
AX-110082013	21	186.242	A	A	B	B	B	B	B	B	B	B	B	B	B	A	B	A	A	A	X	A	B	B	B	A	B	B	B	X	A	A	B	B	A	A	A	B	A	A	A	A	X	B	B	X	A	X	B
AX-109318566	21	186.742	A	A	B	B	B	B	B	B	B	B	B	B	B	A	B	X	A	A	B	A	B	B	B	A	B	B	B	X	A	A	B	B	A	A	A	B	A	A	A	A	X	B	B	B	A	X	B
AX-110946735	21	187.263	A	A	X	B	B	B	B	B	B	B	B	B	B	A	B	X	A	A	B	A	B	B	B	A	B	B	B	X	A	A	B	B	A	A	A	B	A	A	A	A	X	B	B	X	A	X	B
AX-109493621	21	187.784	A	A	B	B	B	B	B	B	B	B	B	B	B	A	B	X	A	A	B	A	B	B	B	A	B	B	B	X	A	A	B	B	A	A	A	B	A	A	A	A	X	B	B	X	A	X	B
AX-109657199	21	188.31	A	A	X	B	B	B	B	B	B	B	X	B	B	A	B	X	A	A	B	A	B	B	B	A	B	B	B	X	A	A	B	B	A	A	A	B	A	A	A	A	X	B	B	B	A	B	B
AX-111301432	21	188.82	A	A	X	B	B	B	B	B	B	B	B	B	B	A	B	X	A	A	B	A	B	B	B	A	B	B	B	X	A	A	B	B	A	A	A	B	A	A	A	A	X	B	B	X	A	B	B
AX-109936012	21	189.851	A	A	X	B	B	B	B	B	B	B	A	B	B	A	B	X	A	A	B	A	B	B	B	A	B	B	B	X	A	A	B	B	A	A	A	B	A	A	A	A	X	B	B	B	A	B	B
AX-109951714	21	190.351	A	A	X	B	B	B	B	B	B	B	A	B	B	A	B	X	A	A	B	A	B	B	B	A	B	B	B	X	A	A	B	B	A	A	A	A	A	A	A	A	X	B	B	B	A	B	B
AX-111879582	21	190.856	A	A	X	B	B	B	B	B	B	B	A	B	B	A	B	X	A	A	B	A	B	B	B	A	A	B	B	X	A	A	B	B	A	A	A	A	A	A	A	A	X	B	B	X	A	B	B
AX-110873228	21	191.367	A	A	X	B	B	B	B	B	B	B	A	B	B	A	B	X	A	A	X	A	B	A	B	A	A	B	B	X	A	A	B	B	A	A	A	A	A	A	A	A	X	B	B	B	A	B	B
AX-111528400	21	192.419	A	A	X	B	B	B	B	B	B	B	X	B	B	A	B	X	A	A	B	A	B	A	B	A	A	B	B	X	A	A	B	B	A	A	A	A	A	A	A	A	X	B	B	B	A	B	B
AX-110912469	21	194.619	A	A	X	B	B	B	B	B	X	B	A	B	B	A	B	X	A	A	X	A	B	A	B	A	A	B	B	X	A	A	B	B	A	A	A	A	A	A	A	A	X	B	B	X	A	B	B
AX-111777564	21	195.65	A	A	X	B	B	B	B	B	X	B	A	B	B	A	B	X	A	A	X	A	B	A	B	A	A	B	B	A	A	B	B	B	A	A	A	A	A	A	A	A	X	B	B	X	A	B	B
AX-109321709	21	196.16	A	A	X	B	B	B	A	B	X	B	A	B	B	A	B	B	A	A	X	A	B	A	B	A	A	B	B	X	A	B	B	B	A	A	A	A	A	A	A	A	X	B	B	X	A	B	B
AX-109811746	21	196.675	A	A	X	B	B	B	A	B	B	B	A	B	B	A	B	X	A	A	B	A	B	A	B	A	A	B	B	X	A	B	B	B	A	A	A	A	A	A	A	A	B	B	B	X	A	B	B
AX-108996488	21	197.696	A	A	X	B	A	B	A	B	X	B	A	B	B	A	B	X	A	A	X	A	B	A	B	A	A	B	B	X	A	B	B	B	A	A	B	A	A	A	A	A	B	B	B	X	A	B	B
AX-111986738	21	198.201	A	A	X	B	A	B	A	B	B	B	A	B	B	A	B	X	A	A	B	A	B	A	B	A	A	B	B	A	A	B	B	B	A	A	B	A	A	A	A	A	B	B	B	X	A	B	B
AX-109998344	21	198.706	A	A	X	B	A	B	A	B	B	B	A	B	B	A	B	X	A	A	X	A	B	A	B	A	A	B	B	X	A	B	B	B	A	A	B	A	A	A	A	A	B	B	B	B	A	B	B
AX-111007875	21	200.269	A	A	X	B	A	B	A	B	X	B	A	B	B	A	B	X	A	A	A	A	B	A	B	A	A	B	B	A	A	B	B	B	A	A	B	A	A	A	A	A	B	B	B	X	A	B	B
AX-110481379	21	202.903	A	A	X	B	A	B	A	B	X	B	A	B	B	A	B	X	A	A	X	A	B	A	B	A	A	B	B	X	X	B	B	B	A	A	B	A	A	A	A	A	B	B	B	X	A	B	B
AX-110410208	21	206.844	A	B	X	B	A	B	A	B	X	A	B	B	B	A	B	X	A	A	X	A	B	A	A	A	A	B	A	X	X	B	B	B	A	A	B	A	A	A	A	A	B	B	B	X	A	B	B
AX-110072600	21	207.931	A	B	A	B	A	B	A	B	X	A	B	B	B	A	B	X	A	A	X	A	B	A	B	A	A	B	A	A	X	B	B	B	A	A	B	A	A	A	A	A	B	B	B	X	A	B	B
AX-110977636	21	208.457	A	B	X	B	A	B	A	B	X	B	B	B	B	A	B	X	A	A	X	A	B	A	B	A	A	B	A	X	B	B	B	B	A	A	B	A	A	A	A	A	B	B	B	B	A	B	B
AX-111640147	21	208.957	A	B	A	B	A	B	A	B	X	A	B	B	B	A	B	X	A	B	X	A	B	A	B	A	A	B	A	X	X	B	B	B	A	A	B	A	A	A	A	A	B	B	B	B	A	B	B
AX-108749039	21	209.478	A	B	X	B	A	B	A	B	B	A	X	B	B	A	B	B	A	B	B	A	B	A	B	A	A	B	A	B	B	B	B	B	A	A	B	X	A	A	A	X	B	B	B	B	A	B	B
AX-109468853	21	210.52	A	B	A	B	B	B	A	B	B	A	B	B	B	A	B	X	A	B	X	A	B	A	B	A	A	B	A	A	X	B	B	B	A	A	B	A	X	A	A	A	B	B	B	X	A	B	B
AX-111927803	21	211.046	A	B	A	B	A	B	A	B	X	A	B	B	B	A	B	X	A	B	X	A	B	A	B	A	A	B	A	X	X	B	B	B	A	A	B	A	A	A	A	A	B	B	B	X	A	B	B
AX-110059327	21	212.077	A	A	A	B	A	B	A	B	X	B	B	B	B	A	B	X	A	A	X	A	B	A	B	A	A	B	A	B	X	B	B	B	A	A	B	A	A	A	A	A	B	B	B	X	A	B	B
AX-86180232	21	212.609	A	B	A	X	B	B	A	X	X	A	B	B	B	B	B	B	A	B	X	A	B	A	B	A	A	B	A	X	X	B	B	B	A	A	B	A	A	A	A	A	B	B	B	B	A	B	B
AX-110193786	21	214.258	A	B	X	X	B	B	A	X	X	A	B	B	B	B	B	A	A	B	X	A	B	A	B	A	A	B	A	X	B	B	B	A	A	A	B	A	A	A	A	A	B	B	B	X	A	B	B
AX-108777441	21	214.763	A	B	A	X	B	B	A	B	X	A	B	B	B	B	B	X	A	B	X	A	B	A	B	A	A	B	A	A	X	B	B	B	A	A	B	A	A	A	A	A	B	B	B	B	A	B	B
AX-111793251	21	216.343	A	B	A	X	B	A	A	B	X	A	B	X	B	B	B	X	A	X	X	A	B	A	B	A	A	B	A	A	X	B	B	B	A	A	B	A	A	A	A	A	B	B	B	X	A	B	B
AX-109305505	21	219.063	A	B	A	X	B	B	A	B	X	A	B	B	B	B	B	X	A	B	X	A	B	A	B	A	A	B	A	A	B	B	B	B	A	A	B	A	A	A	A	A	B	B	B	X	A	B	B
AX-110896255	21	221.813	A	B	A	X	B	B	A	B	X	A	B	B	B	B	B	X	A	B	X	A	B	A	B	A	A	B	A	X	X	B	B	B	A	A	B	A	A	A	A	A	B	B	B	X	A	B	B
AX-111629625	21	237.207	A	X	A	A	B	B	A	B	X	B	B	A	B	B	B	X	A	B	B	A	B	A	B	A	B	B	X	X	B	A	A	B	B	A	B	A	A	A	B	A	A	B	B	X	A	B	A
AX-110887372	21	241.239	X	B	A	A	B	X	A	B	A	B	X	A	X	B	B	X	A	X	B	A	B	B	B	X	B	B	X	X	X	A	A	B	B	A	B	A	A	A	B	A	A	B	B	A	A	B	A
AX-89672223	21	241.807	X	B	X	X	B	B	A	B	A	B	B	A	B	B	B	X	A	X	B	A	B	B	B	X	B	B	X	X	B	A	A	B	B	A	B	A	A	A	B	A	A	B	B	A	A	B	A
AX-109550768	21	253.441	A	B	X	X	A	B	A	B	A	B	B	B	B	B	B	A	A	X	B	A	B	B	B	B	B	B	X	X	B	A	A	A	B	A	B	A	A	A	B	A	A	X	A	A	B	B	A
AX-110048709	21	262.928	X	A	X	B	A	A	B	B	A	B	B	X	X	B	B	B	A	A	B	A	B	B	B	B	B	X	A	A	B	A	A	B	B	A	B	A	A	A	B	A	B	B	A	X	B	B	B
[truncated: 70 more columns]

## Sheet: Supplementary Table S4
Supplementary Table S4. Summary of the epistatic interactions detected using inclusive composite interval mapping of digenic epistatic QTL (ICIM-EPI) functionality in the Gaoxianguangtoumai (GX) × Taichung 29 (TC 29) population among identifed QTL, phenotypic variance by locations and BLUP across environments
Environment	Epistatic interaction	Epistatic LOD	Epistatic PVE	Add1	Add2	Add1 by Add2
CZ2019	2AS×7DS	9.659	23.4627	-6.1577	-7.7126	14.8576
CZ2020	2AS×7DS	8.437	6.5082	-17.1317	-5.5282	14.2934
BLUP	2AS×7DS	6.6484	22.5617	-14.4803	-10.5972	9.4142
LOD logarithm of odds score, PVE percentage of phenotypic variance explained by individual QTL and Add additive efect of the resistance allele

## Sheet: Supplementary Table S5
Supplementary Table S5. The 325 Chinese wheat landraces used for haplotype analysis.
Wheat line	Accessions	Geographic origin	BLUP DS	AX-110026721	AX-111650990	AX-109942382	AX-109957471	AX-110495160	AX-111042596	AX-109434737	Sequence	Haplotype
1	GX	sichuan	7.06192	GG	GG	GG	GG	GG	GG	GG	GGGGGGGGGGGGGG	Hap1
2	Baimaizi	sichuan	20	GG	AG	NN	GG	GG	GG	TT	GGAGNNGGGGGGTT
3	Dongmai'er	sichuan	10	AA	GG	TT	AA	CG	CC	TT	AAGGTTAACGCCTT
4	Baixiapmai	sichuan	40	GG	AA	GG	GG	GG	GG	TT	GGAAGGGGGGGGTT	Hap3
5	AS1073	sichuan	20	GG	AA	GG	GG	GG	GG	NN	GGAAGGGGGGGGNN
6	Tuomai	sichuan	60	GG	AA	GG	GG	GG	GG	TT	GGAAGGGGGGGGTT	Hap3
7	Yuermai	sichuan	20	AA	GG	TT	AA	CG	CC	TT	AAGGTTAACGCCTT
8	liulengxiaomai	sichuan	20	GG	AA	NN	GG	GG	GG	TT	GGAANNGGGGGGTT
9	Guangtoumai	sichuan	20	GG	AA	GG	GG	GG	GG	TT	GGAAGGGGGGGGTT	Hap3
10	Guangtouhonghuamai	sichuan	20	GG	GG	GG	GG	GG	GG	GG	GGGGGGGGGGGGGG	Hap1
11	Heshangmai	sichuan	40	GG	GG	GG	GG	GG	GG	TT	GGGGGGGGGGGGTT
12	Zhaoyaguangtou	sichuan	20	GG	AA	GG	GG	GG	GG	GG	GGAAGGGGGGGGGG	Hap5
13	Zaohuangmai	sichuan	20	GG	GG	GG	GG	GG	GG	GG	GGGGGGGGGGGGGG	Hap1
14	Dalongxu	sichuan	10	GG	AA	GG	GG	GG	GG	GG	GGAAGGGGGGGGGG	Hap5
15	Dahonghua	sichuan	20	GG	AA	GG	GG	GG	GG	TT	GGAAGGGGGGGGTT	Hap3
16	Piantaer	sichuan	60	GG	AA	GG	GG	GG	GG	TT	GGAAGGGGGGGGTT	Hap3
17	Xuxubaimaizi	sichuan	10	GG	AA	GG	GG	GG	GG	TT	GGAAGGGGGGGGTT	Hap3
18	Erlengxuxumai	sichuan	10	GG	AA	GG	GG	GG	GG	TT	GGAAGGGGGGGGTT	Hap3
19	Dalaokemai	sichuan	40	GG	AA	NN	GG	GG	GG	TT	GGAANNGGGGGGTT
20	Hongxiaomai	sichuan	10	GG	GG	GG	GG	GG	GG	TT	GGGGGGGGGGGGTT
21	Honghuamai 1	sichuan	40	GG	GG	GG	GG	GG	GG	GG	GGGGGGGGGGGGGG	Hap1
22	Honghuamai 2	sichuan	20	GG	AA	GG	GG	GG	GG	TT	GGAAGGGGGGGGTT	Hap3
23	Hongtiaomai	sichuan	20	GG	GG	GG	GG	GG	GG	GG	GGGGGGGGGGGGGG	Hap1
24	Baihuamai	sichuan	20	GG	AA	NN	GG	GG	GG	GG	GGAANNGGGGGGGG
25	Dahuangpao	sichuan	20	GG	GG	GG	GG	GG	GG	GG	GGGGGGGGGGGGGG	Hap1
26	Dahonghua	sichuan	20	AA	GG	TT	AA	CG	CC	TT	AAGGTTAACGCCTT
27	Dahongpao	sichuan	40	GG	AA	GG	GG	GG	GG	GG	GGAAGGGGGGGGGG	Hap5
28	Youmangnanmai	sichuan	10	GG	GG	GG	GG	GG	GG	GG	GGGGGGGGGGGGGG	Hap1
29	Tianlvchangxiaomai	sichuan	10	GG	AA	GG	GG	GG	GG	TT	GGAAGGGGGGGGTT	Hap3
30	Yuweimai	sichuan	10	GG	GG	GG	GG	GG	GG	GG	GGGGGGGGGGGGGG	Hap1
31	Qinggangmai	sichuan	40	GG	AA	GG	GG	GG	GG	TT	GGAAGGGGGGGGTT	Hap3
32	Aizihuoshaomai	sichuan	20	GG	GG	GG	GG	GG	GG	GG	GGGGGGGGGGGGGG	Hap1
33	Luohanmai	sichuan	40	GG	GG	GG	GG	GG	GG	GG	GGGGGGGGGGGGGG	Hap1
34	Honghuamai	sichuan	40	GG	AA	GG	GG	GG	GG	TT	GGAAGGGGGGGGTT	Hap3
35	Baixiaomai	sichuan	40	GG	AA	GG	GG	GG	GG	TT	GGAAGGGGGGGGTT	Hap3
36	Mianmai	sichuan	20	GG	AA	GG	GG	GG	GG	TT	GGAAGGGGGGGGTT	Hap3
37	Hefangxiaomai	sichuan	20	AG	AA	GG	GG	GG	GG	GG	AGAAGGGGGGGGGG
38	Hongpaideng	sichuan	40	GG	AA	GG	GG	GG	GG	GG	GGAAGGGGGGGGGG	Hap5
39	Baixu	sichuan	60	AG	AG	TG	AG	CG	NN	TT	AGAGTGAGCGNNTT
40	Baihuaganmaierzi 1	sichuan	20	GG	AA	GG	GG	GG	GG	TT	GGAAGGGGGGGGTT	Hap3
41	Baihuaganmaierzi 2	sichuan	10	GG	AA	GG	GG	GG	GG	GG	GGAAGGGGGGGGGG	Hap5
42	Baihuamai	sichuan	5	GG	AA	GG	GG	GG	GG	TT	GGAAGGGGGGGGTT	Hap3
43	Youmangmai	sichuan	20	GG	GG	GG	GG	GG	GG	TT	GGGGGGGGGGGGTT
44	Baihuaguangtou	sichuan	20	GG	GG	NN	GG	GG	GG	TT	GGGGNNGGGGGGTT
45	Sihonghuaguangtou	sichuan	10	GG	GG	GG	GG	GG	GG	GG	GGGGGGGGGGGGGG	Hap1
46	Pushanmai	sichuan	40	GG	AA	GG	GG	GG	GG	GG	GGAAGGGGGGGGGG	Hap5
47	Paidengmai	sichuan	20	GG	GG	GG	GG	GG	GG	TT	GGGGGGGGGGGGTT
48	Siyuehuang	sichuan	10	GG	AA	GG	GG	GG	GG	TT	GGAAGGGGGGGGTT	Hap3
49	Guangtou	sichuan	10	AA	AA	GG	GG	GG	GG	TT	AAAAGGGGGGGGTT	Hap4
50	Luohanmai	sichuan	20	AA	GG	TT	AA	CG	CC	TT	AAGGTTAACGCCTT
51	Zangzuxiaomai	sichuan	60	GG	GG	NN	GG	GG	GG	TT	GGGGNNGGGGGGTT
52	Sanyueheshangxiaomai	sichuan	10	GG	GG	NN	GG	GG	GG	GG	GGGGNNGGGGGGGG
53	Danaokexiaomai	sichuan	20	GG	AA	GG	GG	GG	GG	NN	GGAAGGGGGGGGNN
54	Luoxiamai	sichuan	10	GG	AA	GG	GG	GG	GG	TT	GGAAGGGGGGGGTT	Hap3
55	Bailanmai	sichuan	20	GG	AA	GG	GG	GG	GG	TT	GGAAGGGGGGGGTT	Hap3
56	jiangxizao	anhui	7.6	GG	AA	GG	GG	GG	GG	GG	GGAAGGGGGGGGGG	Hap5
57	sanyuehuang	sichuan	27.4	GG	AA	GG	GG	GG	GG	TT	GGAAGGGGGGGGTT	Hap3
58	cantiaomai	henan	62.8	AA	GG	GG	GG	GG	GG	GG	AAGGGGGGGGGGGG	Hap6
59	zaoxiaomai	guangdong	84.8	GG	GG	TT	AA	GG	GG	TT	GGGGTTAAGGGGTT
60	hongmangmaizi	sichuan	7.2	GG	AA	GG	GG	GG	GG	TT	GGAAGGGGGGGGTT	Hap3
61	tiezimai	hubei	28.3333	AA	GG	TT	AA	CC	CC	TT	AAGGTTAACCCCTT	Hap2
62	lushanmai	sichuan	2	GG	AA	GG	GG	GG	GG	TT	GGAAGGGGGGGGTT	Hap3
63	qingmangzi	jiangsu	55	AA	GG	TT	AA	CC	CC	TT	AAGGTTAACCCCTT	Hap2
64	datianquxiaomai	guangdong	87	AA	GG	TT	AA	CC	CC	TT	AAGGTTAACCCCTT	Hap2
65	nv'erhong	shaanxi	58.2	AA	GG	GG	GG	GG	GG	GG	AAGGGGGGGGGGGG	Hap6
66	jiachazharenzhuoma	tibet	7.4	GG	GG	TT	AA	GG	GG	TT	GGGGTTAAGGGGTT
67	baikeheshangmai	hunan	8.4	GG	AA	GG	GG	GG	GG	GG	GGAAGGGGGGGGGG	Hap5
68	baisuihong	jiangsu	20.6	GG	AA	GG	GG	GG	GG	TT	GGAAGGGGGGGGTT	Hap3
69	liangganbai	henan	3.6	GG	GG	GG	GG	GG	GG	GG	GGGGGGGGGGGGGG	Hap1
70	baixu	zhejiang	20.6	AA	GG	GG	GG	GG	GG	TT	AAGGGGGGGGGGTT	Hap7
71	pushanbamai	henan	3.4	GG	AA	GG	GG	GG	GG	GG	GGAAGGGGGGGGGG	Hap5
72	molengmai	yunnan	38.2	GG	AA	TT	AA	CC	CC	TT	GGAATTAACCCCTT	Hap8
73	baikexuxusanyuehuang	sichuan	10.4	GG	AA	GG	GG	GG	GG	TT	GGAAGGGGGGGGTT	Hap3
74	caoxieban	hubei	29.4	GG	AA	GG	GG	GG	GG	GG	GGAAGGGGGGGGGG	Hap5
75	tutoumai	henan	27.8	AA	GG	TT	AA	CC	CC	TT	AAGGTTAACCCCTT	Hap2
76	huanghuazhu	jiangsu	61	AA	GG	TT	AA	CC	CC	TT	AAGGTTAACCCCTT	Hap2
77	jianzituan	jiangsu	9.2	AA	GG	TT	AA	CC	CC	TT	AAGGTTAACCCCTT	Hap2
78	baikeguangtou	zhejiang	55.6	AA	GG	TT	AA	CC	CC	TT	AAGGTTAACCCCTT	Hap2
79	qumangmai	henan	16	GG	AA	GG	GG	GG	GG	GG	GGAAGGGGGGGGGG	Hap5
80	yuqiumai	guizhou	34	AA	GG	GG	GG	GG	GG	TT	AAGGGGGGGGGGTT	Hap7
81	tiekemai	yunnan	1	AA	AA	GG	GG	GG	GG	GG	AAAAGGGGGGGGGG
82	hongmanghongmai	shandong	27	GG	AA	TT	AA	CC	CC	TT	GGAATTAACCCCTT	Hap8
83	zhuantoubaike	jiangsu	15.6	AA	GG	TT	AA	CC	CC	TT	AAGGTTAACCCCTT	Hap2
84	huangshuibai	zhejiang	73.8	AA	AA	GG	GG	GG	GG	TT	AAAAGGGGGGGGTT	Hap4
85	laochushanbao	henan	32.8	AA	AA	GG	GG	GG	GG	TT	AAAAGGGGGGGGTT	Hap4
86	bomizamai-5	tibet	47.4	GG	AA	TT	AA	CC	CC	TT	GGAATTAACCCCTT	Hap8
87	xiaoqingmang	gansu	9	AA	GG	TT	AA	CC	CC	TT	AAGGTTAACCCCTT	Hap2
88	hechuanmai	sichuan	5.2	GG	GG	GG	GG	GG	GG	TT	GGGGGGGGGGGGTT
89	zaodongmai	sichuan	6.4	GG	GG	GG	GG	GG	GG	GG	GGGGGGGGGGGGGG	Hap1
90	baijiaomai	shanghai	21.8	GG	AA	GG	GG	GG	GG	TT	GGAAGGGGGGGGTT	Hap3
91	guangtoumai	guangxi	41	AA	GG	NN	AA	CC	CC	TT	AAGGNNAACCCCTT
92	wuyangmai	sichuan	43	GG	AA	GG	GG	GG	GG	TT	GGAAGGGGGGGGTT	Hap3
93	puningxiaomai	guangdong	43.4	GG	AA	GG	GG	GG	GG	TT	GGAAGGGGGGGGTT	Hap3
94	nuopangtou	jiangsu	53.2	AA	GG	TT	AA	CC	CC	TT	AAGGTTAACCCCTT	Hap2
95	hongxumai	sichuan	2.8	GG	AA	GG	GG	GG	GG	TT	GGAAGGGGGGGGTT	Hap3
96	hongtiaomai	sichuan	54.4	GG	GG	GG	GG	GG	GG	GG	GGGGGGGGGGGGGG	Hap1
97	youtiaomai	sichuan	4.4	GG	AA	GG	GG	GG	GG	GG	GGAAGGGGGGGGGG	Hap5
98	yulincao	shandong	20	AA	GG	TT	AA	CC	CC	TT	AAGGTTAACCCCTT	Hap2
99	baiwugongcao	shaanxi	17	AA	GG	TT	AA	CC	CC	TT	AAGGTTAACCCCTT	Hap2
100	youmai	guangdong	66.2	AA	GG	TT	AA	CC	CC	TT	AAGGTTAACCCCTT	Hap2
101	xiaozhihongmai	liaoning	38.6	AA	AA	GG	GG	GG	GG	TT	AAAAGGGGGGGGTT	Hap4
102	baimanghong	shanxi	43.6	AA	AA	GG	GG	GG	GG	TT	AAAAGGGGGGGGTT	Hap4
103	tuotuomai	sichuan	3.2	GG	AA	GG	GG	GG	GG	TT	GGAAGGGGGGGGTT	Hap3
104	guangguangtou	sichuan	16.8	GG	AA	GG	GG	GG	GG	TT	GGAAGGGGGGGGTT	Hap3
105	hongtoumai	zhejiang	39.4	AA	GG	TT	AA	GG	GG	GG	AAGGTTAAGGGGGG
106	xuemai	jilin	41	AG	AA	GG	GG	GG	GG	TT	AGAAGGGGGGGGTT
107	yu'ermai	shaanxi	8.4	AA	GG	GG	GG	GG	GG	TG	AAGGGGGGGGGGTG
108	baiqimai	gansu	47.4	AA	GG	GG	GG	GG	GG	GG	AAGGGGGGGGGGGG	Hap6
109	hongtuzi	ningxia	9.4	AA	GG	TT	AA	CC	CC	TT	AAGGTTAACCCCTT	Hap2
110	jinbaoyu	shandong	31	GG	AA	GG	GG	GG	GG	TT	GGAAGGGGGGGGTT	Hap3
111	guangtoubaikemai	yunnan	5.5	AA	AA	GG	GG	GG	GG	TT	AAAAGGGGGGGGTT	Hap4
112	huakemai	yunnan	2.6	GG	AA	GG	GG	GG	GG	GG	GGAAGGGGGGGGGG	Hap5
113	youmangcao	henan	21	GG	AA	TT	AA	CC	CC	TT	GGAATTAACCCCTT	Hap8
114	banmangmai	shandong	52.4	GG	AA	GG	GG	GG	GG	TT	GGAAGGGGGGGGTT	Hap3
115	hongmaomai	gansu	30	AA	GG	TT	AA	CC	CC	TT	AAGGTTAACCCCTT	Hap2
116	daqimai	shaanxi	10.8	GG	AA	GG	GG	GG	GG	TT	GGAAGGGGGGGGTT	Hap3
117	baimai39F	hebei	20	GG	AA	TT	AA	CC	CC	TT	GGAATTAACCCCTT	Hap8
118	tumai	beijing	65.6	AA	AA	GG	GG	GG	GG	TT	AAAAGGGGGGGGTT	Hap4
119	yejiling	shandong	62.4	AA	AA	TT	AA	CC	CC	TT	AAAATTAACCCCTT
120	baikejiang	sichuan	20.8	GG	AA	TT	AA	CC	CC	TT	GGAATTAACCCCTT	Hap8
121	youmangshangeda	shanxi	53.76	AA	AA	TG	GG	GG	GG	TT	AAAATGGGGGGGTT
122	xiaobaisui	inner mongolia	5	GG	AA	TT	NN	CC	CC	NN	GGAATTNNCCCCNN
123	hongmangxiaomai	shandong	12	AA	GG	GG	GG	GG	GG	GG	AAGGGGGGGGGGGG	Hap6
124	baishanmai	shanxi	64.4	AA	AA	GG	GG	GG	GG	TT	AAAAGGGGGGGGTT	Hap4
125	honghulubaimai	hebei	18.2	AA	AA	GG	GG	GG	GG	TT	AAAAGGGGGGGGTT	Hap4
126	ranriwumangmai	sichuan	85.0667	AA	AA	GG	GG	GG	GG	GG	AAAAGGGGGGGGGG
127	zhuganqing	shanxi	22.8	AA	GG	TT	AA	CC	CC	TT	AAGGTTAACCCCTT	Hap2
128	dakoumai	henan	41.8	NN	GG	TG	GG	GG	GG	GG	NNGGTGGGGGGGGG
129	banjiemangdabai	shandong	43.3333	AA	AA	GG	GG	GG	GG	TT	AAAAGGGGGGGGTT	Hap4
130	baitutou	shandong	46.6	AA	AA	GG	GG	GG	GG	TT	AAAAGGGGGGGGTT	Hap4
131	siqiangxiaomai	shaanxi	6.3	AA	GG	GG	GG	GG	GG	TT	AAGGGGGGGGGGTT	Hap7
132	mazhatoumai	shandong	7.2	AA	GG	GG	GG	GG	GG	TT	AAGGGGGGGGGGTT	Hap7
133	xiaohongmai	shaanxi	66	AA	GG	TG	GG	GG	GG	GG	AAGGTGGGGGGGGG
134	baimangmai	beijing	50.2	AA	AA	GG	GG	GG	GG	TT	AAAAGGGGGGGGTT	Hap4
135	hongmangbai	tianjin	34.6	AA	AA	GG	GG	GG	GG	TT	AAAAGGGGGGGGTT	Hap4
136	mangmai	inner mongolia	1.2	AA	GG	TT	AA	CC	CC	TT	AAGGTTAACCCCTT	Hap2
137	huangmaizi	sichuan	2.6	GG	GG	GG	GG	GG	GG	TT	GGGGGGGGGGGGTT
138	xiaozibai	henan	16.8	AA	GG	NN	GG	GG	GG	GG	AAGGNNGGGGGGGG
139	zihuatou	henan	10	AA	GG	TT	AA	CC	CC	TT	AAGGTTAACCCCTT	Hap2
140	baikumai	shandong	35.4	AA	AA	GG	GG	GG	GG	TT	AAAAGGGGGGGGTT	Hap4
141	baimangyouzi	henan	65.6	AA	AA	GG	GG	GG	GG	TT	AAAAGGGGGGGGTT	Hap4
142	guchengxiaomai	hebei	65.2	AA	AA	GG	GG	GG	GG	TT	AAAAGGGGGGGGTT	Hap4
143	erguangtou	hebei	23.25	AA	AA	GG	GG	GG	GG	TT	AAAAGGGGGGGGTT	Hap4
144	dahongmang	hebei	43.8	GG	AA	TT	AA	CC	CC	TT	GGAATTAACCCCTT	Hap8
145	baixiaomai	beijing	30	AA	AA	GG	GG	GG	GG	TT	AAAAGGGGGGGGTT	Hap4
146	zhangmuxiaomai	guangxi	70.4	GG	GG	TT	AA	GG	GG	TT	GGGGTTAAGGGGTT
147	baigedatou	henan	7.8	AA	AA	TT	AA	CC	CC	TT	AAAATTAACCCCTT
148	xiaoyuhua	jiangsu	18.5	GG	AA	GG	GG	GG	GG	TT	GGAAGGGGGGGGTT	Hap3
149	laobaimai	gansu	0.8	AA	GG	TT	AA	CC	CC	TT	AAGGTTAACCCCTT	Hap2
150	xiaobaipi	hebei	77.6	AA	AA	GG	GG	GG	GG	TT	AAAAGGGGGGGGTT	Hap4
151	baimangmai	hebei	45.2	AA	AA	GG	GG	GG	GG	TT	AAAAGGGGGGGGTT	Hap4
152	xiaohongmai(babao)	qinghai	42.4	GG	AA	GG	GG	GG	GG	TT	GGAAGGGGGGGGTT	Hap3
153	deguolan	shaanxi	38.8	AA	GG	GG	GG	GG	GG	GG	AAGGGGGGGGGGGG	Hap6
154	baishamai	shandong	31.5	AA	AA	GG	GG	GG	GG	GG	AAAAGGGGGGGGGG
155	hongmangbai	hebei	37.2	AA	AA	GG	GG	GG	GG	TT	AAAAGGGGGGGGTT	Hap4
156	piaoxiao	shandong	34.75	AA	AA	TT	AA	CC	CC	TT	AAAATTAACCCCTT
157	caoxiepian	guizhou	18.4	GG	AA	GG	GG	GG	GG	GG	GGAAGGGGGGGGGG	Hap5
158	gaochan1hao	hebei	38.2	AA	AA	GG	GG	GG	GG	TT	AAAAGGGGGGGGTT	Hap4
159	dabailing	hebei	76	AA	AA	GG	GG	GG	GG	TT	AAAAGGGGGGGGTT	Hap4
160	zijingbai	hebei	39.4	AA	AA	GG	GG	GG	GG	TT	AAAAGGGGGGGGTT	Hap4
161	louguding	shandong	96	GG	AA	TT	AA	CC	CC	TT	GGAATTAACCCCTT	Hap8
162	lingbao925	henan	53	AA	GG	GG	GG	GG	GG	NN	AAGGGGGGGGGGNN
163	xiaohongmai	qinghai	26	AA	GG	GG	GG	GG	GG	TT	AAGGGGGGGGGGTT	Hap7
164	baihulutou	hebei	81	AA	AA	GG	GG	GG	GG	TT	AAAAGGGGGGGGTT	Hap4
165	wugongxu	hubei	92.8	GG	AA	TT	AA	CC	CC	TT	GGAATTAACCCCTT	Hap8
166	yangmai	hubei	41.2	GG	AA	TT	AA	CC	CC	TT	GGAATTAACCCCTT	Hap8
167	xiaomangmai	shanxi	58.6	AA	GG	TT	AA	CC	CC	TT	AAGGTTAACCCCTT	Hap2
168	benmai	henan	5.4	GG	AA	GG	GG	GG	GG	TT	GGAAGGGGGGGGTT	Hap3
169	baike	hebei	32.2	AA	AA	GG	GG	GG	GG	TT	AAAAGGGGGGGGTT	Hap4
170	baisuizi	shandong	61.6	GG	AA	TT	AA	CC	CC	TT	GGAATTAACCCCTT	Hap8
171	xiaohongmangliangmai	shandong	31.4	AA	AA	GG	GG	GG	GG	TT	AAAAGGGGGGGGTT	Hap4
172	baihulutou	tianjin	57.6	AA	AA	GG	GG	GG	GG	TT	AAAAGGGGGGGGTT	Hap4
173	dabaimai	shanxi	10	AA	AA	GG	GG	GG	NN	GG	AAAAGGGGGGNNGG
174	daqitou	hebei	29	GG	AA	GG	GG	GG	GG	TT	GGAAGGGGGGGGTT	Hap3
175	liulengmai	hebei	74.5	AA	AA	GG	GG	GG	GG	TT	AAAAGGGGGGGGTT	Hap4
176	chunqiumaizi	hebei	55.8	AG	AA	GG	GG	GG	GG	TT	AGAAGGGGGGGGTT
177	gongxianmai	hebei	75.2	AA	AA	GG	GG	GG	GG	TT	AAAAGGGGGGGGTT	Hap4
178	youmangcao	henan	17.6	GG	AA	GG	GG	GG	GG	TT	GGAAGGGGGGGGTT	Hap3
179	yejihong	shandong	26.5	AA	GG	GG	GG	GG	GG	TT	AAGGGGGGGGGGTT	Hap7
180	dabaimai	hebei	73.2	AA	AA	GG	GG	GG	GG	TT	AAAAGGGGGGGGTT	Hap4
181	yigongzhuo	tibet	28.75	AA	GG	TT	AA	CC	CC	TT	AAGGTTAACCCCTT	Hap2
182	baimai	hubei	42.2	AA	GG	GG	GG	GG	GG	TT	AAGGGGGGGGGGTT	Hap7
183	baitumai	shandong	6.75	AA	AA	GG	GG	GG	GG	TT	AAAAGGGGGGGGTT	Hap4
184	hongduomai	shandong	45	AA	GG	GG	GG	GG	GG	GG	AAGGGGGGGGGGGG	Hap6
185	changmangbaike	shaanxi	5.8	AA	GG	TT	AA	CC	CC	TT	AAGGTTAACCCCTT	Hap2
186	xiaobiansui	shandong	17	AA	AA	TT	AA	CC	CC	TT	AAAATTAACCCCTT
187	xiaomai	gansu	3.6	GG	AA	GG	GG	CC	CC	TT	GGAAGGGGCCCCTT
188	dadangzhuo	tibet	51.9167	GG	AA	GG	GG	GG	GG	GG	GGAAGGGGGGGGGG	Hap5
189	bomiduanqu	tibet	26.4	GG	AA	TT	AA	CC	CC	TT	GGAATTAACCCCTT	Hap8
190	galaohan	qinghai	13.6	AA	AA	TT	AA	CC	CC	TT	AAAATTAACCCCTT
191	shenggexiaomai	tibet	89	AA	GG	TT	AA	CC	CC	TT	AAGGTTAACCCCTT	Hap2
192	baipibai	hebei	59.2	AA	AA	GG	GG	GG	GG	TT	AAAAGGGGGGGGTT	Hap4
193	huimai	guizhou	59.6	AA	GG	TT	AA	GG	GG	TT	AAGGTTAAGGGGTT
194	fanshenzhuo	tibet	81	AA	AA	GG	GG	GG	GG	TT	AAAAGGGGGGGGTT	Hap4
195	xiaobaipi	inner mongolia	15.45	AA	AA	TT	AA	CC	CC	GG	AAAATTAACCCCGG
196	wumangbaimai	tibet	87.2	AA	GG	TT	AA	CC	CC	TT	AAGGTTAACCCCTT	Hap2
197	qingxinlanmai	xinjiang	10.25	AA	GG	GG	GG	GG	GG	TT	AAGGGGGGGGGGTT	Hap7
198	baidatou	gansu	63.25	AA	GG	TT	AA	CC	CC	TT	AAGGTTAACCCCTT	Hap2
199	huaqixiaomai	jiangsu	17.6	AA	GG	TT	AA	CC	CC	TT	AAGGTTAACCCCTT	Hap2
200	lanmai	qinghai	80.8	AA	GG	TT	AA	CC	CC	TT	AAGGTTAACCCCTT	Hap2
201	baichunmai	gansu	0	AA	GG	TT	AA	CC	CC	TT	AAGGTTAACCCCTT	Hap2
202	henanbai	beijing	30.4	AA	NN	GG	GG	GG	GG	TG	AANNGGGGGGGGTG
203	gouweibabaimai	shaanxi	0	AA	GG	GG	GG	GG	GG	TT	AAGGGGGGGGGGTT	Hap7
204	zharenzhuoma	tibet	42.5625	AA	AA	GG	GG	GG	GG	GG	AAAAGGGGGGGGGG
205	shidaosankemang	shandong	9.8	AA	GG	GG	GG	GG	GG	TT	AAGGGGGGGGGGTT	Hap7
206	bo’erqing	shandong	12.75	AA	AA	GG	GG	GG	GG	TT	AAAAGGGGGGGGTT	Hap4
207	gaoshanzaoshuxiaomai	sichuan	10.4	AA	AA	GG	GG	GG	GG	GG	AAAAGGGGGGGGGG
208	youzimai	hebei	77	AA	AA	GG	GG	GG	GG	TT	AAAAGGGGGGGGTT	Hap4
209	xianjumai	zhejiang	52.2	AG	GG	GG	GG	GG	GG	TT	AGGGGGGGGGGGTT
210	yupi	sichuan	82.4	AA	GG	GG	GG	GG	GG	GG	AAGGGGGGGGGGGG	Hap6
211	tajizhuo	tibet	77	AA	GG	TT	AA	CC	CC	TT	AAGGTTAACCCCTT	Hap2
212	laohongmai	gansu	26.4	AA	AA	TT	AA	CC	CC	TT	AAAATTAACCCCTT
213	maoyinmai	tibet	12.5	AA	GG	TT	AA	CC	CC	TT	AAGGTTAACCCCTT	Hap2
214	jigupizhuo	tibet	0	AA	AA	GG	GG	GG	GG	GG	AAAAGGGGGGGGGG
215	xiaohongmang	hebei	73.4	AA	GG	GG	GG	GG	GG	TT	AAGGGGGGGGGGTT	Hap7
216	tarongzhuo	tibet	55	AA	GG	TT	AA	CC	CC	TT	AAGGTTAACCCCTT	Hap2
217	jidingwumangchun	tibet	94.3	AA	GG	TT	AA	CC	CC	TT	AAGGTTAACCCCTT	Hap2
218	zhaonixiaomai	sichuan	10.25	GG	NN	GG	GG	GG	GG	NN	GGNNGGGGGGGGNN
219	shunshuihong	jiangsu	8.25	GG	AA	GG	GG	GG	GG	TT	GGAAGGGGGGGGTT	Hap3
220	wangkamai	tibet	50.875	GG	AA	GG	GG	GG	GG	GG	GGAAGGGGGGGGGG	Hap5
221	changmangmaoyinmai	tibet	41.8	AA	AA	GG	GG	GG	GG	TT	AAAAGGGGGGGGTT	Hap4
222	hongheshang	shandong	24.5	AA	AA	GG	GG	GG	GG	GG	AAAAGGGGGGGGGG
223	qimai	shandong	49.25	AA	GG	TT	AA	CC	CC	TT	AAGGTTAACCCCTT	Hap2
224	yangmai	shaanxi	20.25	AA	GG	GG	GG	GG	GG	GG	AAGGGGGGGGGGGG	Hap6
225	huanghuaxiaomai	sichuan	62.4	GG	AA	GG	GG	GG	GG	TT	GGAAGGGGGGGGTT	Hap3
226	jiachashumai	tibet	60.5	AA	GG	TT	AA	CC	CC	GG	AAGGTTAACCCCGG
227	zharenmabu	tibet	71	GG	AA	GG	GG	GG	GG	GG	GGAAGGGGGGGGGG	Hap5
228	zedangzaxiaomai	tibet	54	AA	GG	TT	AA	CC	CC	TT	AAGGTTAACCCCTT	Hap2
229	quxiajizhuo	tibet	87	AA	GG	GG	GG	GG	NN	GG	AAGGGGGGGGNNGG
230	tiegengqing	zhejiang	9.8	AA	GG	TT	AA	CC	CC	TT	AAGGTTAACCCCTT	Hap2
231	shihuiyaohuomai	shaanxi	65.875	AA	AA	GG	GG	GG	GG	GG	AAAAGGGGGGGGGG
232	zhaxigangzhuo	tibet	81	AA	GG	TT	AA	CC	CC	TT	AAGGTTAACCCCTT	Hap2
233	rendachangguangmai	tibet	81.5	AA	GG	TT	AA	CC	CC	TT	AAGGTTAACCCCTT	Hap2
234	dingrichangmang	tibet	42.4	AA	AA	GG	GG	GG	GG	GG	AAAAGGGGGGGGGG
235	zhaguogouqumai	tibet	41.3333	AA	GG	TT	AA	CC	CC	TT	AAGGTTAACCCCTT	Hap2
236	baikebai	hebei	82.4	AA	AA	GG	GG	GG	GG	TT	AAAAGGGGGGGGTT	Hap4
237	wumangxiaomai	tibet	100	AA	GG	TT	AA	CC	CC	TT	AAGGTTAACCCCTT	Hap2
238	kuchebaidongmai	xinjiang	13	AA	GG	GG	GG	GG	GG	TT	AAGGGGGGGGGGTT	Hap7
239	xiaogongxian	shandong	46.75	AA	AA	TT	AA	CC	CC	TT	AAAATTAACCCCTT
240	changmangpeizhuo	tibet	33.5	AA	GG	TT	NN	CC	CC	TT	AAGGTTNNCCCCTT
241	zhenjiang3-96	jiangsu	11.8	AA	GG	TT	AA	CC	CC	TT	AAGGTTAACCCCTT	Hap2
242	baiyuxiaomai	sichuan	0	AA	AA	GG	GG	GG	GG	GG	AAAAGGGGGGGGGG
243	suzhuozhuoma	tibet	26.8	AA	AA	GG	GG	NN	GG	TT	AAAAGGGGNNGGTT
244	erdaomei	inner mongolia	34.8	AA	GG	GG	GG	GG	GG	TT	AAGGGGGGGGGGTT	Hap7
245	xiaomaimang	hebei	52.25	AA	GG	TT	AA	CC	CC	TT	AAGGTTAACCCCTT	Hap2
246	shanxihong	gansu	41	AA	AA	GG	GG	GG	GG	TT	AAAAGGGGGGGGTT	Hap4
247	zhana	tibet	47.25	GG	AA	GG	GG	GG	GG	TT	GGAAGGGGGGGGTT	Hap3
248	renbuchun	tibet	18.4167	GG	AA	GG	GG	GG	GG	GG	GGAAGGGGGGGGGG	Hap5
249	pumanghongmai	tibet	15.8	AA	GG	TT	AA	CC	CC	TT	AAGGTTAACCCCTT	Hap2
250	heshangmai	hunan	13.8	AA	AA	GG	GG	GG	GG	TT	AAAAGGGGGGGGTT	Hap4
251	baimaier	sichuan	22.2	AA	GG	TT	AA	CC	CC	TT	AAGGTTAACCCCTT	Hap2
252	tiezhuantou	zhejiang	36.6	AA	GG	TT	AA	CC	CC	TT	AAGGTTAACCCCTT	Hap2
253	baimangzi	jiangsu	11.6	AA	GG	TT	AA	CC	CC	TT	AAGGTTAACCCCTT	Hap2
254	baikangyangmai	shandong	15.8	GG	AA	GG	GG	GG	GG	TT	GGAAGGGGGGGGTT	Hap3
255	xiaobaimai	henan	5.2	AA	GG	TT	AA	CC	CC	TT	AAGGTTAACCCCTT	Hap2
256	xinjinyoumang	liaoning	35.4	AA	AA	NN	GG	GG	GG	TT	AAAANNGGGGGGTT
257	wugongmai	zhejiang	62.4	GG	AA	TT	AA	CC	CC	TT	GGAATTAACCCCTT	Hap8
258	xiaoganmai	hubei	17.4	GG	AA	GG	GG	GG	GG	GG	GGAAGGGGGGGGGG	Hap5
259	wuhuatou	henan	52.8	AA	GG	TT	AA	CC	CC	TT	AAGGTTAACCCCTT	Hap2
260	liulengmai	guizhou	13.2	AA	AA	GG	GG	GG	GG	TT	AAAAGGGGGGGGTT	Hap4
261	xiaozihong	henan	15.4	AA	GG	GG	GG	GG	GG	GG	AAGGGGGGGGGGGG	Hap6
262	hongmai	jiangsu	33	GG	AA	GG	GG	GG	GG	TT	GGAAGGGGGGGGTT	Hap3
263	baiyuhua	jiangsu	10.2	GG	AA	GG	GG	GG	GG	GG	GGAAGGGGGGGGGG	Hap5
264	qingtianmai	zhejiang	22.8	AA	AA	GG	GG	GG	GG	TT	AAAAGGGGGGGGTT	Hap4
265	xiaohongmang	heilongjiang	-	AA	AA	TT	AA	CC	CC	TT	AAAATTAACCCCTT
266	zhuganqing	hubei	24	AA	GG	TT	AA	CC	CC	TT	AAGGTTAACCCCTT	Hap2
267	guangtoumai	guizhou	3.8	GG	AA	GG	GG	GG	GG	GG	GGAAGGGGGGGGGG	Hap5
268	wugongmai	hubei	44	AA	GG	TT	AA	CC	CC	TT	AAGGTTAACCCCTT	Hap2
269	qingyuanxiaomai	guangdong	71.2	AA	GG	GG	GG	GG	NN	TT	AAGGGGGGGGNNTT
270	dalihong	henan	25.6	AA	GG	TT	AA	CC	CC	TT	AAGGTTAACCCCTT	Hap2
271	guangtoumai	jiangxi	11.4	AA	GG	TT	AA	CC	CC	TT	AAGGTTAACCCCTT	Hap2
272	baitiaoyu	henan	25	AA	GG	TT	AA	CC	CC	TT	AAGGTTAACCCCTT	Hap2
273	huxumai	anhui	20.6	AA	GG	TT	NN	CC	CC	TT	AAGGTTNNCCCCTT
274	yicuomao	sichuan	21.4	GG	GG	GG	GG	GG	GG	TT	GGGGGGGGGGGGTT
275	wugongmai	anhui	12.4	AA	GG	TT	AA	CC	CC	TT	AAGGTTAACCCCTT	Hap2
276	cantiaomai	shaanxi	14.8	GG	AA	GG	GG	GG	GG	TT	GGAAGGGGGGGGTT	Hap3
277	baijiantiao	shaanxi	53.6	AA	GG	GG	GG	GG	GG	GG	AAGGGGGGGGGGGG	Hap6
278	quanmangxiaomai	hubei	10.2	GG	AA	NN	GG	GG	GG	TT	GGAANNGGGGGGTT
279	nanjinghuang	jiangsu	34.4	AA	GG	TT	AA	CC	CC	TT	AAGGTTAACCCCTT	Hap2
280	hongkewugong	zhejiang	78.4	AA	AA	GG	GG	GG	GG	TT	AAAAGGGGGGGGTT	Hap4
281	xiaohongmang	jiangsu	60	AA	GG	NN	AA	CC	CC	TT	AAGGNNAACCCCTT
282	xishuibagutao	hubei	26.6	AA	GG	GG	GG	GG	GG	GG	AAGGGGGGGGGGGG	Hap6
283	baihuomai	henan	29.5	GG	AA	GG	GG	GG	GG	GG	GGAAGGGGGGGGGG	Hap5
284	yuweimai	sichuan	4.8	GG	AA	GG	GG	GG	GG	GG	GGAAGGGGGGGGGG	Hap5
285	putaomai	shanghai	5.8	AA	GG	TT	AA	CC	CC	TT	AAGGTTAACCCCTT	Hap2
286	hongmangmai	guizhou	6.4	GG	GG	TT	AA	CC	CC	TT	GGGGTTAACCCCTT
287	xiaolihong	jiangsu	5.4	AA	AA	TT	AA	CC	CC	TT	AAAATTAACCCCTT
288	bailanmai	shaanxi	27.4	AA	GG	GG	GG	GG	GG	GG	AAGGGGGGGGGGGG	Hap6
289	qianqianmai	guizhou	3	GG	AA	GG	GG	GG	GG	GG	GGAAGGGGGGGGGG	Hap5
290	huayangxiaomai	sichuan	1	GG	GG	GG	GG	GG	GG	GG	GGGGGGGGGGGGGG	Hap1
291	baikexiaomai	guangdong	29.6	AA	GG	TT	NN	CC	CC	TT	AAGGTTNNCCCCTT
292	dahonghua	sichuan	12	GG	GG	GG	GG	GG	GG	GG	GGGGGGGGGGGGGG	Hap1
293	kumai	henan	3.75	AA	GG	TT	AA	CC	CC	TT	AAGGTTAACCCCTT	Hap2
294	yangmaizi	yunnan	31.2	AA	GG	GG	GG	GG	GG	GG	AAGGGGGGGGGGGG	Hap6
295	wugongbian	anhui	31.2	AA	GG	GG	GG	GG	GG	GG	AAGGGGGGGGGGGG	Hap6
296	huoshaomai	guangdong	60	AA	AA	TT	AA	CC	CC	TT	AAAATTAACCCCTT
297	changshamai	hubei	22.2	GG	AA	GG	GG	GG	GG	TT	GGAAGGGGGGGGTT	Hap3
298	tutoubai	hebei	49.8	GG	AA	GG	GG	GG	GG	TT	GGAAGGGGGGGGTT	Hap3
299	laobaitiaozi	shaanxi	53.2	AA	GG	GG	GG	GG	GG	GG	AAGGGGGGGGGGGG	Hap6
300	dahongpi	jiangsu	17.5	GG	AA	GG	GG	GG	GG	TG	GGAAGGGGGGGGTG
301	daoshuibai	jiangsu	30.3333	AA	GG	TG	AA	CC	CC	TT	AAGGTGAACCCCTT
302	heshangmai	fujian	60.4	AA	GG	TT	NN	CC	CC	NN	AAGGTTNNCCCCNN
303	dujiaqiaoxiaomai	zhejiang	49.6	AA	GG	TG	AA	CC	CC	TT	AAGGTGAACCCCTT
304	huomai	henan	18.6	GG	AA	TT	NN	CC	CC	TT	GGAATTNNCCCCTT
305	zimai	hubei	18.4	AA	GG	GG	GG	GG	GG	GG	AAGGGGGGGGGGGG	Hap6
306	yejihong	jiangsu	45.2	GG	AA	GG	GG	GG	GG	TT	GGAAGGGGGGGGTT	Hap3
307	Chinese Spring	sichuan	4.8	GG	AA	GG	GG	GG	GG	TT	GGAAGGGGGGGGTT	Hap3
308	dabaimang	hebei	63.6	AA	GG	GG	GG	GG	GG	TT	AAGGGGGGGGGGTT	Hap7
309	yerenmao	henan	59	AA	GG	TT	AA	CC	CC	TT	AAGGTTAACCCCTT	Hap2
310	zimai	yunnan	1	GG	GG	GG	GG	GG	GG	TT	GGGGGGGGGGGGTT
311	baixianmang	shanxi	37.6	AA	GG	GG	GG	GG	GG	TT	AAGGGGGGGGGGTT	Hap7
312	zaohuangmai	sichuan	24.2	GG	AA	GG	GG	GG	GG	GG	GGAAGGGGGGGGGG	Hap5
313	yuzuiweimai	sichuan	6.2	GG	AA	GG	GG	GG	GG	GG	GGAAGGGGGGGGGG	Hap5
314	baikeyoumang	fujian	67.4	GG	AA	TT	AA	CC	CC	TT	GGAATTAACCCCTT	Hap8
315	qiyanghongke	hunan	18	AA	AG	TT	AA	CC	CC	TT	AAAGTTAACCCCTT
316	shanyangxue	shaanxi	26	GG	AA	GG	GG	GG	GG	GG	GGAAGGGGGGGGGG	Hap5
317	youmangyangmai	gansu	21.8	AA	GG	NN	GG	GG	GG	TT	AAGGNNGGGGGGTT
318	xiaobaimang	hebei	84.2	AA	AA	GG	GG	GG	GG	TT	AAAAGGGGGGGGTT	Hap4
319	manghuazi	jiangsu	24.2	AA	GG	TT	AA	CC	CC	TT	AAGGTTAACCCCTT	Hap2
320	guangdezao	jiangsu	34.4	GG	AA	GG	GG	GG	GG	GG	GGAAGGGGGGGGGG	Hap5
321	baizhaoyu	jiangsu	30	AA	GG	TT	AA	CC	CC	TT	AAGGTTAACCCCTT	Hap2
322	pushanba	shaanxi	1.2	GG	AA	GG	GG	GG	GG	TT	GGAAGGGGGGGGTT	Hap3
323	baiheshangtou	henan	57.2	AA	GG	TT	AA	CC	CC	TT	AAGGTTAACCCCTT	Hap2
324	daqingmang	tianjin	61.6	AA	AA	GG	GG	GG	GG	NN	AAAAGGGGGGGGNN
325	zaoxiaomai	zhejiang	14.6	GG	AA	GG	GG	GG	GG	TT	GGAAGGGGGGGGTT	Hap3

## Sheet: Supplementary Table S6
Supplementary Table S6. Primer sequences of KASP markers developed based on SNP markers with close linkages to stripe rust resistance QTL QYr.GX-2AS.
Marker	Chromosome	Physical postion	Primer sequence (5’–3’)
KP2A_33.69	chr2A	33699240	Forward A_FAM	GAAGGTGACCAAGTTCATGCTGCAGGAAACCCCTAAAAACGG
			Forward B_HEX	GAAGGTCGGAGTCAACGGATTGCAGGAAACCCCTAAAAACGT
			Common reverse	TGGATGACATATATTAGCTGCGA
KP2A_34.32	chr2A	34322048	Forward A_FAM	GAAGGTGACCAAGTTCATGCTATGCCGATCAGTGGGATGCT
			Forward B_HEX	GAAGGTCGGAGTCAACGGATTATGCCGATCAGTGGGATGCC
			Common reverse	CCTAGGAAGTCACACTGCCC
KP2A_35.89	chr2A	35891228	Forward A_FAM	GAAGGTGACCAAGTTCATGCTCCTCTCATGGTGGGTGAAAATATG
			Forward B_HEX	GAAGGTCGGAGTCAACGGATTCCTCTCATGGTGGGTGAAAATATC
			Common reverse	TTGATGAGTGGGCCCAGTG
KP2A_35.95	chr2A	35952218	Forward A_FAM	GAAGGTGACCAAGTTCATGCTGTTGTCCTTCGTTGGCCG
			Forward B_HEX	GAAGGTCGGAGTCAACGGATTGTTGTCCTTCGTTGGCCT
			Common reverse	TTTGCGGGAGATGCTTGC
KP2A_36.54	chr2A	36543390	Forward A_FAM	GAAGGTGACCAAGTTCATGCTGCCCAAAACTAGATTTCCCAGAAG
			Forward B_HEX	GAAGGTCGGAGTCAACGGATTGCCCAAAACTAGATTTCCCAGAAT
			Common reverse	CCTATTTCAGAGAGCGCGCT
KP2A_36.85	chr2A	36851536	Forward A_FAM	GAAGGTGACCAAGTTCATGCTTTGTTGGACGCGCCCATTA
			Forward B_HEX	GAAGGTCGGAGTCAACGGATTTTGTTGGACGCGCCCATTG
			Common reverse	TTTGTCACGTTTGCCATGCC
KP2A_37.09	chr2A	37091371	Forward A_FAM	GAAGGTGACCAAGTTCATGCTTGAGCTGCACGATAACTGTATTA
			Forward B_HEX	GAAGGTCGGAGTCAACGGATTTGAGCTGCACGATAACTGTATTG
			Common reverse	GGTAGTCAAAGTGCCTGGCA
KP2A_38.22	chr2A	38220002	Forward A_FAM	GAAGGTGACCAAGTTCATGCTCAGCCTTGATAACACCCACG
			Forward B_HEX	GAAGGTCGGAGTCAACGGATTCAGCCTTGATAACACCCACA
			Common reverse	CCATGGTGGTGGAGACCTTT
KP2A_39.23	chr2A	39233090	Forward A_FAM	GAAGGTGACCAAGTTCATGCTTCTAGGAAGTCAAGATAGGCCA
			Forward B_HEX	GAAGGTCGGAGTCAACGGATTTCTAGGAAGTCAAGATAGGCCG
			Common reverse	TCACCGAGATCGAGCATTGT
KP2A_40.65	chr2A	40650914	Forward A_FAM	GAAGGTGACCAAGTTCATGCTGGTGGAGAGTTGGTTTCTGTTC
			Forward B_HEX	GAAGGTCGGAGTCAACGGATTGGTGGAGAGTTGGTTTCTGTTT
			Common reverse	AGTTCCAGGTTGGTAAGAGATC
KP2A_42.70	chr2A	42696611	Forward A_FAM	GAAGGTGACCAAGTTCATGCTACGGCATTCTACTAGTTAAAAGTGA
			Forward B_HEX	GAAGGTCGGAGTCAACGGATTACGGCATTCTACTAGTTAAAAGTGG
			Common reverse	GATTAGCTGCAACTGGAAGCG

## Sheet: Supplementary Table S7
Supplementary Table S7. Genotype and phenotype of the in a heterogeneous inbred family (HIF) population of 130 individuals (F2) for QYr.GX-2AS.
No.	Phenotype	KP2A_33.69	KP2A_34.32	KP2A_35.89	KP2A_35.95	KP2A_36.54	KP2A_36.85	KP2A_37.09	KP2A_38.22	KP2A_39.23	KP2A_40.65	KP2A_42.70
1	S	B	B	B	B	B	B	B	H	H	H	H
2	R	A	A	A	A	A	A	A	A	A	A	A
3	R	H	H	H	H	H	H	H	H	H	H	H
4	R	B	B	H	H	H	H	H	H	H	H	H
5	R	H	H	H	H	H	A	A	A	A	A	A
6	R	A	A	A	A	A	A	A	A	A	A	A
7	R	H	H	H	H	H	H	H	H	H	H	H
8	R	H	H	H	H	H	H	H	H	H	H	H
9	R	A	A	A	A	A	A	A	A	A	A	A
10	S	H	H	H	H	B	B	B	B	B	B	B
11	R	H	H	H	H	H	H	H	H	H	H	H
12	S	B	B	B	B	B	B	B	B	B	B	B
13	S	B	B	B	B	B	B	B	B	B	B	B
14	R	H	H	H	H	H	H	H	H	H	H	H
15	S	B	B	B	B	B	B	B	B	B	B	B
16	R	H	H	H	H	H	H	H	A	A	A	A
17	R	H	H	H	H	H	H	H	H	H	H	H
18	R	A	A	A	A	A	A	A	A	A	A	A
19	R	A	A	A	A	A	A	A	A	A	A	A
20	R	H	H	H	H	H	H	H	H	H	H	H
21	R	H	H	H	H	H	H	H	H	H	H	H
22	R	H	H	H	H	H	H	H	H	H	H	H
23	S	B	B	B	B	B	B	B	B	B	B	B
24	R	H	H	H	H	H	H	H	H	H	H	H
25	S	B	B	B	B	B	B	B	B	B	B	B
26	R	H	H	H	H	H	H	H	H	H	H	H
27	R	H	H	H	H	H	H	H	H	H	H	H
28	R	H	H	H	H	H	H	H	H	H	H	H
29	R	H	H	H	H	H	H	H	H	H	H	H
30	R	H	H	H	H	H	H	H	H	H	H	H
31	R	H	H	H	H	H	H	H	H	H	H	H
32	R	H	H	H	H	H	H	H	H	H	H	H
33	R	H	H	H	H	H	H	H	H	H	H	H
34	R	A	A	A	A	A	A	A	A	A	A	A
35	R	B	B	H	H	H	H	H	H	H	H	H
36	R	A	A	A	A	A	A	A	A	A	A	A
37	R	H	H	H	H	H	H	H	H	H	H	H
38	R	H	H	H	H	H	A	A	A	A	A	A
39	R	H	H	H	H	H	H	H	H	H	H	H
40	R	H	H	H	H	H	H	H	H	H	H	H
41	R	H	H	H	H	H	H	H	H	H	H	H
42	R	H	H	H	H	H	H	H	H	H	H	H
43	R	A	H	H	H	H	H	H	H	H	H	H
44	R	H	H	H	H	H	H	H	H	H	H	H
45	R	H	A	A	A	A	A	A	A	A	A	A
46	R	H	H	H	H	H	H	H	H	H	H	H
47	S	B	B	B	B	B	B	B	B	B	B	B
48	R	H	H	H	H	H	H	H	H	H	H	H
49	S	B	B	B	B	B	B	B	B	B	B	B
50	R	A	A	H	H	H	H	H	H	H	H	H
51	R	A	A	A	A	A	A	A	A	A	A	A
52	S	B	B	B	B	B	B	B	B	B	B	B
53	R	A	A	A	A	H	H	H	H	H	H	H
54	R	B	B	H	H	H	H	H	H	H	H	H
55	R	H	H	H	H	H	H	H	H	H	H	H
56	R	H	H	H	H	H	H	H	H	H	H	H
57	S	B	B	B	B	B	B	B	B	B	B	B
58	S	B	B	B	B	B	B	B	B	B	B	B
59	S	B	B	B	B	B	B	B	B	B	B	B
60	S	B	B	B	B	B	B	B	B	B	B	B
61	R	A	H	H	H	H	H	H	H	H	H	H
62	R	H	H	H	H	H	H	H	H	H	H	H
63	R	H	H	H	H	H	H	H	H	H	H	H
64	R	H	H	H	H	H	H	H	H	H	H	H
65	R	A	A	A	A	A	A	H	H	H	H	H
66	S	B	B	B	B	B	B	B	B	H	H	H
67	R	H	H	H	H	H	H	H	H	H	H	H
68	S	B	B	B	B	B	B	B	B	B	B	B
69	R	H	H	H	H	H	H	H	H	H	H	H
70	R	A	A	A	A	A	A	A	A	A	A	A
71	R	A	A	A	A	A	A	H	H	H	H	H
72	R	H	H	H	H	H	H	H	H	H	H	H
73	R	H	H	H	H	H	H	H	H	H	H	H
74	R	A	A	A	A	A	A	A	A	A	A	A
75	S	B	B	B	B	B	B	B	B	B	B	B
76	R	A	A	A	A	A	A	H	H	H	H	H
77	S	B	B	B	B	B	B	B	B	B	B	B
78	R	A	A	A	A	A	A	A	A	A	A	A
79	R	A	A	A	A	A	A	A	A	A	A	A
80	S	B	B	B	B	B	B	B	B	B	B	B
81	R	H	H	H	H	H	H	H	H	H	H	H
82	R	A	A	A	A	A	A	A	A	A	A	A
83	R	A	A	H	H	H	H	H	H	H	H	H
84	R	A	A	A	A	A	A	A	A	A	A	A
85	S	B	B	B	B	B	B	B	B	B	B	B
86	R	H	H	H	H	H	H	H	H	H	H	H
87	R	H	H	H	H	H	H	H	H	H	H	H
88	S	H	H	B	B	B	B	B	B	B	B	B
89	R	H	H	H	H	H	H	H	H	H	H	H
90	R	A	A	A	A	A	A	A	A	A	A	A
91	R	H	H	H	H	H	H	H	H	B	B	B
92	S	B	B	B	B	B	B	B	B	B	B	B
93	S	B	B	B	B	B	B	B	B	B	B	B
94	R	H	H	H	H	H	H	H	H	H	H	H
95	R	H	H	H	H	H	H	H	H	H	H	H
96	R	H	H	H	H	H	H	H	H	H	H	H
97	R	A	A	A	A	A	A	A	A	A	A	A
98	R	A	A	A	A	A	A	A	A	A	A	A
99	R	H	H	H	H	H	H	H	H	B	B	B
100	R	A	A	A	A	A	A	A	A	A	A	A
101	R	H	H	H	H	H	H	H	H	H	H	H
102	S	B	B	B	B	B	B	B	B	B	B	B
103	S	B	B	B	B	B	B	B	B	B	B	B
104	R	H	H	H	H	H	H	H	H	H	H	H
105	R	H	H	H	H	H	H	H	H	H	H	H
106	R	H	H	H	H	H	H	H	H	H	H	H
107	R	H	H	H	H	H	H	H	H	H	A	A
108	S	H	H	B	B	B	B	B	B	B	B	B
109	S	B	B	B	B	B	B	B	B	B	B	B
110	R	H	H	H	H	H	H	H	H	H	H	H
111	S	H	H	H	H	B	B	B	B	B	B	B
112	R	A	A	A	A	A	A	A	A	A	A	A
113	S	B	B	B	B	B	B	B	B	B	B	B
114	R	H	H	H	H	H	H	H	H	H	H	H
115	S	B	B	B	B	B	B	B	B	B	B	B
116	R	A	A	A	A	A	A	A	A	A	A	A
117	R	A	A	A	A	A	A	A	A	A	A	A
118	S	B	B	B	B	B	B	B	B	B	B	B
119	R	H	H	H	H	H	H	H	H	H	H	H
120	R	A	A	A	A	A	A	A	A	A	A	A
121	R	A	A	A	A	A	A	A	A	A	A	A
122	R	B	H	H	H	H	H	H	H	H	A	A
123	R	H	H	H	H	H	H	H	H	H	H	H
124	S	B	B	B	B	B	B	B	B	B	B	B
125	R	A	A	A	A	A	A	A	A	A	A	A
126	R	A	A	A	A	A	A	A	A	A	A	A
128	S	B	B	B	B	B	B	B	B	B	B	B
129	R	H	H	H	H	H	H	H	H	H	H	H
127	R	B	B	B	B	B	B	H	H	H	H	H
130	R	H	H	H	H	H	H	H	H	H	H	H

## Sheet: Supplementary Table S8
Supplementary Table S8. Genotypes of marker loci in resistance QTL on chromosomes 2AS in 109 Sichuan wheat cultivars/breeding lines.
No.	Cultivar/line	Pedigree		Resistance type	KP2A_36.85	KP2A_37.09	KP2A_38.22
	GX			APR	G:G	A:A	G:G
	TC 29			S	A:A	C:C	A:A
1	Chuanchongzu 125	Chuanmai 42 / Chuanmai 16	2010	APR	A:A	C:C	A:A
2	Chuanmai 104	Chuanmai 42 / Chuannong 16	2012	S	A:A	C:C	A:A
3	Chuanmai 107	246 / 80-28-7	2000	S	G:G	C:C	A:A
4	Chuanmai 28	[(Wanya 2 / 2874) // (Gaojiasuo / 2874) ] /// Mianyang 19	1997	S	G:G	C:C	A:A
5	Chuanmai 29	(Tai 2874 / 7781-1-2) // (K4 / 305)	1997	S	A:A	C:C	A:A
6	Chuanmai 33	2469 / 80-28-7	2002	S	G:G	C:C	A:A
7	Chuanmai 38	Syn-CD769 / SW89-3243 // Chuan6415	2003	S	A:A	C:C	A:A
8	Chuanmai 39	Mo444 / 90-7	2003	S	A:A	C:C	A:A
9	Chuanmai 41	91T4135 / 88Fan8	2003	S	A:A	C:C	A:A
10	Chuanmai 44	96Xia440 / Guinong21	2004	S	A:A	C:C	A:A
11	Chuanmai 46	Ta193-6280 / 96-5429	2005	APR	A:A	C:C	A:A
12	Chuanmai 47	Syn-CD786 / Mianyang26 // Mianyang26	2005	S	A:A	C:C	A:A
13	Chuanmai 49	Guinong 21 / Shenghe 3295	2006	S	G:G	C:C	A:A
14	Chuanmai 51	174 / 183 // 99-1572	2008	S	A:A	C:C	A:A
15	Chuanmai 52	Chuanmai 36 / SW1862	2008	S	A:A	C:C	A:A
16	Chuanmai 62	Fr3 / SW1862	2012	APR	A:A	C:C	A:A
17	Chuannong 16	Chuanyu12 / 87-429	2002	S	A:A	C:C	A:A
18	Chuannong 19	Qian 1104A/R935	2003	APR	A:A	C:C	A:A
19	Chuannong 21	R841/Qianhui 3	2004	APR	A:A	C:C	A:A
20	Chuannong 24	Baili 3 / Yunfan 52894-2	2007	APR	A:A	C:C	A:A
21	Chuannong 25	96I-225 / 91S-5-4	2007	S	A:A	C:C	A:A
22	Chuannong 27	Chuannong19 / R3301	2009	APR	A:A	C:C	A:A
23	Chuannong 7	Mianyang11 / 84-2014	2000	S	G:G	C:C	A:A
24	Chuannongmai 1	-	-	-	A:A	C:C	A:A
25	Liangmai 2	Mianyang 26 /// ( 10-A/88-1643// Chuanyu 12 )	2004	S	G:G	C:C	A:A
26	Shumai 375	(Mianyang93-7 / 92R141) // Mianyang96-324	2007	S	A:A	C:C	A:A
27	Shumai 482	(Mianyang93-7 / 92R141) // Mianyang96-324	2008	S	G:G	C:C	A:A
28	Shumai 51	N711 / N2401	2013	S	A:A	C:C	A:A
29	Shumai 969	SHW-L1 / SW8188 // Chuanyu18/3 / Chuanmai 42	2013	S	G:G	A:A	A:A
30	Chuanyu 14	9902 / 21646	1998	S	A:A	C:C	A:A
31	Chuanyu 16	(30020 / 8619-10) // Jinmai30	2002	S	A:A	C:C	A:A
32	Chuanyu 18	Chuanyu 5 / Mo460 // 94F2-4	2003	APR	A:A	C:C	G:G
33	Chuanyu 20	SW3243 // 35050 / 21530	2006	APR	A:A	C:C	A:A
34	Chuanyu 21	Zhou88114 / G159	2007	APR	A:A	C:C	A:A
35	Chuanyu 23	R59 // Zheng9023 / H435	2008	APR	A:A	C:C	A:A
36	Kechengmai 1	Guinong 22 / Chuanyu 12	2005	S	A:A	C:C	A:A
37	Kechengmai 2	Xianyang(big spike)/E // 1/3 / Guinong20/4 / Mianyang26	2009	S	A:A	C:C	G:G
38	Zhongkemai 138	Chuanmai 42 / Chuanyu 16	2014	S	A:A	C:C	A:A
39	Zhongkemai 47	W7268 / durum wheat // Chuanmai 107	2014	S	A:A	C:C	A:A
40	Mianmai 185	Mianyang96-5 / Liaochun 10	2008	S	A:A	C:C	A:A
41	Mianmai 37	96EW37 / Mianyang90-100	2004	S	A:A	C:C	A:A
42	Mianmai 39	Mianyang96-78 / Guinong21-1	2005	S	A:A	C:C	A:A
43	Mianmai 40	Mianyang01821 / Guinong19-4	2005	S	A:A	C:C	A:A
44	Mianmai 41	Mianyang01821 / 90Zhong165 // Guinong19-4	2006	APR	A:A	C:C	A:A
45	Mianmai 42	Mianyang96-5 / Guinong21-1	2006	APR	A:A	C:C	G:G
46	Mianmai 43	07146-12-1 (Mianyang92-8 / 88-304) / Guinong19-4	2009	APR	A:A	C:C	A:A
47	Mianmai 45	07146-12-1 / Guinong19-4	2007	APR	A:A	C:C	A:A
48	Mianmai 46	07242-3-1-1 / Guinong21	2008	S	A:A	C:C	A:A
49	Mianmai 51	1275-1 / 99-1522	2012	S	A:A	C:C	A:A
50	Mianyang 26	Mianyang81-5 / Chuanyu81-24	1998	S	A:A	C:C	A:A
51	Mianyang 27	81-5 / 81-24	1997	S	A:A	C:C	A:A
52	Mianyang 29	Mianyang11 / 95-3	1999	S	G:G	C:C	A:A
53	Mianyang 30	Mianyang01821 / 83-13028 // Mianyang0552014	2003	S	A:A	C:C	A:A
54	Mianyang 31	Mianyang91-310 / Chuanzhi89-076	2002	S	A:A	C:C	A:A
55	Mianyang 33	1294 / Mianyang86-5	2003	S	A:A	C:C	A:A
56	Mianyang 35	05363-8-1 / Mianyou 2	2003	S	G:G	C:C	G:G
57	Changmai 26	3461 / Xichang 16	2006	APR	A:A	C:C	A:A
58	Changmai 28	1712 / 1761	2008	APR	A:A	C:C	A:A
59	Xichang 18	(5595 / Zhong7605) /// ((76-4 / Xin76-6) // 301)	2003	APR	A:A	C:C	A:A
60	Xichang 19	1712 / 1761	2004	APR	A:A	C:C	G:G
61	Xifu 12	85γ×876 / 85γ-118	2003	S	A:A	C:C	A:A
62	Xifu 13	85γ-876 / 85γ-118	2004	S	A:A	C:C	A:A
63	Xifu 14	Xichangfanxiumai treated by 60Coγ ray and kept self-pollination to get generation 6	2006	S	A:A	C:C	A:A
64	Xikemai 1	Mianyang88-304 / Mo-212	2003	S	A:A	C:C	A:A
65	Xikemai 2	Chuanyu 11 / Mo444	2005	APR	A:A	C:C	A:A
66	Xikemai 3	Guinong21 / 5575	2007	S	A:A	C:C	A:A
67	Xikemai 5	Guinong21 / 96Ⅱ-39	2008	S	A:A	C:C	A:A
68	Xikemai 6	Mianyang95-325 / 92R-135	2008	APR	A:A	C:C	A:A
69	Xikemai 7	Chuanyu11 / Mo444	2012	S	A:A	C:C	A:A
70	Xikemai 9	Nei4301 / Mianyang 31	2014	S	G:G	C:C	A:A
71	Nan 04-59	-	-	-	A:A	C:C	A:A
72	Nanmai 302	16-1 / PanzaoR	2012	S	A:A	C:C	A:A
73	Nanmai 618	2001-43-1 / PanzaoR	2013	S	A:A	C:C	A:A
74	Rongchuannanmai 1	16-1 / PanzaoR	2014	S	A:A	C:C	A:A
75	Neimai 3416	R57 / Ping 5	2010	S	A:A	C:C	A:A
76	Neimai 11	Mianyang26 / 92R178	2007	S	A:A	C:C	A:A
77	Neimai 8	Mianyang26 / 92R178	2003	S	A:A	C:C	A:A
78	Neimai 9	Mianyang26 / 92R178	2004	S	A:A	C:C	A:A
79	Panmai 6	12632 / Xingmai18	1998	S	G:G	C:C	A:A
80	Panmai 7	Xingyuan 1 / Mianyang 15	1999	S	A:A	C:C	A:A
81	Rongmai 2	53283 / 90M776	2003	S	A:A	C:C	A:A
82	Yimai 9	R59 / Yi97-24	2014	S	A:A	C:C	A:A
83	Yumai 1	R59 / 4551	2009	S	G:G	C:C	A:A
84	Zimai 1	Mianyang 29 / Chuanmai 25	2006	S	A:A	C:C	A:A
85	Zimai 1	Mianyang 29 / Chuanmai 25	2006	S	G:G	C:C	A:A
86	Xianmai 99	T10090 / YT4-8	2009	APR	G:G	C:C	A:A
87	Jinkemai 33	Mila / 172	2009	S	A:A	C:C	A:A
88	Chuanfu 7	5X / 4093 (F1 treated with Co-γ)	2015	APR	A:A	C:C	A:A
89	Chuanfu 8	39849-14-3 / 03-DH1959	2015	APR	A:A	C:C	A:A
90	Chuanmai 1131	01-3570 / R138	2014	S	A:A	C:C	A:A
91	Chuanmai 1145	01-3570 / R138	2014	S	A:A	C:C	A:A
92	Chuanmai 601	(Guinong21 / SW3243) / (Chuanmai42 / Chuanmai44)	2016	APR	A:A	C:C	A:A
93	Chuanmai 68	99-1572 / 98-266 // 01-3570	2015	S	A:A	C:C	A:A
94	Chuanmai 81	SW8019 / 99-1572 // 99-1572	2015	S	A:A	C:C	A:A
95	Chuanmai 92	Neimai 8 / Jian3 // Chuanmai42	2015	APR	A:A	C:C	A:A
96	Chuannong 29	02017 / R88// R131	2015	S	A:A	C:C	A:A
97	Chuannong 30	03FR1349-1 / 54789 // Chuannong 27	2016	APR	A:A	C:C	A:A
98	Chuanyu 25	Jinding-1 / 41058	2015	APR	A:A	C:C	A:A
99	Chuanyu 26	Chuanyu23 / 4 / G219 / 3 / Chuanyu16 // H5 / Luobulin	2016	APR	A:A	C:C	A:A
100	Guohaomai 3	1227-185/99-1522//99-1572	2016	APR	A:A	C:C	A:A
101	Kechengmai 4	37147 / CD02-1574-3	2015	APR	G:G	C:C	A:A
102	Kechengmai 5	37147 / Chuanmai 37	2016	APR	A:A	C:C	A:A
103	Mianmai 112	Mian 06-367 / 99-1522	2015	S	A:A	C:C	A:A
104	Mianmai 285	1275-1 / 99-1522	2016	S	A:A	C:C	A:A
105	Nanmai 991	30-9-1 / 04-2-33	2015	S	A:A	C:C	A:A
106	Neimai 366	Balandal 88 / Nei4344	2015	S	A:A	C:C	A:A
107	Shumai 126	Chuanyu 23 / B1291	2016	APR	A:A	C:C	A:A
108	Shumai 921	030104-13 / Neimai 11	2016	S	A:A	C:C	A:A
109	Xikemai 10	99-55 / 1257	2015	APR	A:A	C:C	A:A

## Sheet: Supplementary Table S9
Supplementary Table S9. The details of the previously mapped Yr genes and QTL on chromosome 2AS.
Genea	Flanking markers	Physical postionb (Mb)	PVE (%)	Origin	Resistance type	References
Yr17	SCY-15,Xpsr150-2Nv,SC-372, SC-385 （2NvS）	0-25		T. ventricosum VPM I	ASR	Bariana and McIntosh, (1993)
Yr56	Xsun167(XwPt-4197)–Xsun168(XwPt-9104)	8.35-14.28		T. durum AUS36344	ASR	Bansal and Bariana, (1993)
Yr69	X2AS33–Xmag3807	2.15-14.82		Th. Ponticum CH7086	ASR	Hou et al., (2016)
YrSph	Xwmc246/Xgwm372–F-me15/R-me6/Xwmc149	41.05-203.31		T. sphaerococcum AS348	ASR	Chen et al., (2012)
YrR61	Xbarc124–Xgwm359	3.78-28.20		T. aestivum Pioneer 26R61	APR	Hao et al., (2011)
QYr.inra_2AS.1_Recital	XDupw210–Xcfd36	3.97-16.63	5.52-8.56	T. aestivum Recital	APR	Dedryver et al., (2009)
QYr.ufs-2A	Xgwm636–XwPt-0003	4.98-29.94	28.8-47.8	T. aestivum Cappelle-Desprez	APR	Agenbag et al., (2012)
QYrva.vt-2AS_VA00W-38	Xgwm296b–XwPt-7721	19.03-29.94	30.8-66.7	T. aestivum VA00W-38	APR	Christopher et al., (2013)
QYr.sun-2A_Kukri	XwPt-0003–XwPt-3114/117454	23.75-29.94	12.9-15	T. aestivum Kukri	APR	Bariana et al., (2010)
QYr.ucw-2AS_PI610750	XwPt-3896–Xwmc177	13.14-33.70	2.2	T. aestivum PI610750	APR	Lowe et al., (2011)
QYr.tam-2AS_TAM 111	XwPt-3896–XwPt-6431	~13.14	17.0-17.9	T. aestivum TAM 111	ASR	Basnet et al., (2014)
QYrtb.orz-2AS_cfd36	Xcfd36	~16.63	57.7	T. aestivum Tubbs (PI 651023)	APR	Vazquez et al., (2015)
QYrst.orr-2AS_Stephens	XwPt-0003	~23.75	9-20	T. aestivum Stephens (CI 017596)	APR	Vazquez et al., (2012)
QYr.inra-2A_CampRemy	Xgwm382a–Xgwm359	~28.20	20-40	T. aestivum Camp Remy	APR	Mallard et al., (2005)
QYrzv.swust-2AS	IWB7877–IWB72720	5.25-5.33	8.7-9.3	T. dicoccoides Zavitan	APR	Zhou et al., (2021)
QYr.wpg-2A.1_gwm359	Xgwm359	~28.20	5	Several (GWAS)	APR	Naruoka et al., (2015)
QYr.wpg-2A.2_IWA8274	XIWA8274	~16.55	5.0-7.0	Several (GWAS)	APR	Naruoka et al., (2015)
QYr.wpg-2A.3_IWA3047	XIWA3047	~21.25	4	Several (GWAS)	APR	Naruoka et al., (2015)
QYr.wpg-2A.4_IWA7410	XIWA7410	~32.15	3	Several (GWAS)	APR	Naruoka et al., (2015)
QYr.ucw-2A.2_IWA422	XIWA422	~19	0.8	Several (GWAS)	ASR	Maccaferri et al., (2015)
QYr.ucw-2A.3_IWA424	XIWA424	~101.38	0.3	Several (GWAS)	APR	Maccaferri et al., (2015)
QYr.wsu-2A.1_IWA2526	XIWA2526	~36.63	4.34	Several (GWAS)	APR	Bulli et al., (2016)
QYr.wsu-2A.2_IWA5824	XIWA5824	~77.53	2.62	Several (GWAS)	APR	Bulli et al., (2016)
YrTtd-2AS	XIWB1046	~55.47	-	Several (GWAS)	APR	Liu et al., (2017)
Qyrww.wgp.2A-1	IWB40903	~4.95	12-16	Several (GWAS)	APR	Mu et al., (2020)
aX.M. Chen, and Z.S. Kang, "Chapter 5: Stripe Rust Resistance"in Stripe Rust, (2017) 392-403; 428-433 and 445-474.
bPhysically located in the IWGSC RefSeq v1.0
Bariana, H. S., and McIntosh, R. A. (1993). Cytogenetic studies in wheat. XV. Location of rust resistance genes in VPM1 and their genetic linkage with other disease resistance genes in chromosome 2A. Genome 36 (3), 476-482. doi: 10.1139/g93-065
Bansal, K., and Bariana, H. (2014). Mapping of stripe rust resistance gene Yr56 in durum wheat cultivar Wollaroi. BGRI 2014 Technical workshop, 22–25 March, Obregon, Mexico; 2014.
Hou, L. Y., Jia, J. Q., Zhang, X. J., Li, X., Yang, Z. J., Ma, J., Guo, H. J., Zhan, H. X., Qian, L. Y., and Chang, Z. J. (2016). Molecular mapping of the stripe rust resistance gene Yr69 on wheat chromosome 2AS. Plant Dis. 100, 1717-1724. doi: 10.1094/PDIS-05-15-0555-RE
Chen, S. S., Chen, G. Y., Chen, H., Wei, Y. M., Li, W., Liu, Y. X., Liu, D. C., Lan, X. J., and Zheng, Y. L. (2012). Mapping stripe rust resistance gene YrSph derived from Tritium sphaerococcum Perc. with SSR, SRAP, and TRAP markers. Euphytica 185 (1), 19-26. doi: 10.1007/s10681-011-0593-9
Hao, Y., Chen, Z., Wang, Y., Bland, D., Buck, J., Brown-Guedira, G., and Johnson, J. (2011). Characterization of a major QTL for adult plant resistance to stripe rust in US soft red winter wheat. Theor. Appl. Genet. 123 (8), 1401-1411. doi: 10.1007/s00122-011-1675-8
Dedryver, F., Paillard, S., Mallard, S., Robert, O., Trottet, M., Nègre, S., Verplancke, G., and Jahier, J. (2009). Characterization of genetic components involved in durable resistance to stripe rust in the bread wheat “Renan”. Phytopathology 99 (8), 968-973. doi: 10.1094/PHYTO-99-8-0968
Agenbag, G. M., Pretorius, Z. A., Boyd, L. A., Bender, C. M., and Prins, R. (2012). Identification of adult plant resistance to stripe rust in the wheat cultivar cappelle-desprez. Theor. Appl. Genet. 125 (1), 109-120. doi: 10.1007/s00122-012-1819-5
Christopher, M. D., Liu, S., Hall, M. D., Marshall, D. S., and Griffey, C. A. (2013). Identification and mapping of adult plant stripe rust resistance in soft red winter wheat VA00W-38. Plant Breeding 132 (3), 53-60. doi: 10.1111/pbr.12015
Bariana, H. S., Bansal, U. K., Schmidt, A., Lehmensiek, A., Kaur, J., Miah, H., Howes, N., and McIntyre, C. L. (2010). Molecular mapping of adult plant stripe rust resistance in wheat and identification of pyramided QTL genotypes. Euphytica 176 (2), 251-260. doi: 10.1007/s10681-010-0240-x
Lowe, I., Cantu, D., and Dubcovsky, J. (2011). Durable resistance to the wheat rusts: integrating systems biology and traditional phenotype-based research methods to guide the deployment of resistance genes. Euphytica 179 (1), 69-79. doi: 10.1007/s10681-010-0311-z
Basnet, B. R., Ibrahim, A. M. H., Chen, X. M., Singh, R., Mason, R. E., Bowden, R., Liu, S. Y., Hays, D. B., Devkota, R. N., Subramanian, N., and Rudd, J. (2014). Molecular mapping of stripe rust resistance in hard red winter wheat TAM 111 adapted to the U.S. high plains. Crop Sci. 54 (4), 1361-1373. doi: 10.2135/cropsci2013.09.0625
Vazquez, M. D., Robert, Z., Peterson, C. J., Chen, X. M., Heesacker, A., and Mundt, C. C. (2015). Multi-location wheat stripe rust qtl analysis: genetic background and epistatic interactions. Theor. Appl. Genet. 128 (7), 1307-1318. doi: 10.1007/s00122-015-2507-z
Vazquez, M. D., Peterson, C. J., Riera-Lizarazu, O., Chen, X., Heesacker, A., and Mundt, C. (2012). Genetic analysis of adult plant, quantitative resistance to stripe rust in wheat cultivar ‘Stephens’ in multi-environment trials. Theor. Appl. Genet. 124 (1), 1-11. doi: 10.1007/s00122-011-1681-x
Mallard, S., Gaudet, D., Aldeia, A., Abelard, C., Besnard, A. L., Sourdille, P., and Dedryver, F. (2005). Genetic analysis of durable resistance to yellow rust in bread wheat. Theor. Appl. Genet. 110 (8), 1401-1409. doi: 10.1007/s00122-005-1954-3
Zhou, X. L., Zhong, X., Roter, J., Li, X., Yao, Q., Yan, J. H., Yang, S. Z., Guo, Q. Y., Distelfeld, A., Sela, H., and Kang, Z. S. (2021). Genome-wide mapping of loci for adult-plant resistance to stripe rust in durum wheat Svevo using the 90K SNP array. Plant Dis. 105 (4), 879-888. doi: 10.1094/PDIS-09-20-1933-RE
Naruoka, Y., Garland-Campbell, K. A., and Carter, A. H. (2015). Genome-wide association mapping for stripe rust (Puccinia striiformis f. sp. tritici) in US Pacific Northwest winter wheat (Triticum aestivum L.). Theor. Appl. Genet. 128 (6), 1083–1110. doi: 10.1007/s00122-015-2492-2
Maccaferri, M., Zhang, J., Bulli, P., Abate, Z., Chao, S., Cantu, D., Bossolini, E., Chen, X., Pumphrey, M., and Dubcovsky, J. (2015). A genome-wide association study of resistance to stripe rust (Puccinia striiformis f. sp. tritici) in a worldwide collection of hexa-ploid spring wheat (Triticum aestivum L.). G3: Genes Genom. Genet. 5 (3), 449–465. doi: 10.1534/g3.114.014563
Bulli, P., Zhang, J. L., Chao, S. M., Chen, X. M., and Pumphrey, M. (2016). Genetic architecture of resistance to stripe rust in a global winter wheat germplasm collection. G3: Genes Genom. Genet. 6 (8), 2237–2253. doi: 10.1534/g3.116.028407
Liu, W., Maccaferri, M., Chen, X. M., Laghetti, G., and Tuberosa, R. (2017) Genome-wide association mapping reveals a rich genetic architecture of stripe rust resistance loci in emmer wheat (Triticum turgidum ssp. dicoccum). Theor. Appl. Genet. 130 (11), 2249–2270. doi: 10.1007/s00122-017-2957-6
Mu, J. M., Liu, L., Liu, Y., Wang, M. N., See, D. R., Han, D. J., and Chen, X. M. (2020) Genome-wide association study and gene specific markers identified 51 genes or QTL for resistance to stripe rust in U.S. winter wheat cultivars and breeding lines. Front. Plant Sci. 11, 998. doi: 10.3389/fpls.2020.00998

## Sheet: Supplementary Table S10
Supplementary Table S10. List of candidate genes in the closest flanking markers KP2A_36.85 and KP2A_38.22 and gene annotations based on Chinese Spring IWGSC RefSeq v1.1.
Gene ID	Poisition	Gene Region	Reference	Allele (GX)	Non-synonymous	Amino acids variations	Description
TraesCS2A02G081500.1	36880421	55	G	A	Yes	Val19Ile	NEP1-interacting protein-like 1
	36880554	188	T	C	Yes	Val63Ala
	36880643	277	A	G	Yes	Ile93Val
TraesCS2A02G081600.1	36884136	68	C	G	Yes	Ala23Gly	Unknow
	36884278	117	T	C	No
	36893502	191	A	T	Yes	Glu64Val
	36893694	284	G	T	Yes	Tr95Leu
TraesCS2A02G081700.1	36903943	88	G	A	Yes	As30Asn	Unknow
	36904302	280	-	G	Yes	Val94fs
TraesCS2A02G081800.1	36917298	44	C	T	Yes	Ser15Leu	Unknow
	36917340	86	A	T	Yes	As29Val
	36917424	170	G	A	Yes	Arg57Gln
TraesCS2A02G081900.2	36934685	1229	T	C	Yes	Gln410Arg	Two-component response regulator-like PRR37
	36934712	1202	T	C	Yes	As401Gly
TraesCS2A02G082000.1	37078095	115	T	C	Yes	Cys39Arg	Protein RETARDED ROOT GROWTH-LIKE
	37078355	375	A	G	No
TraesCS2A02G082100.1	37084855	207	A	G	No		L-ascorbate peroxidase 2, cytosolic
	37084954	306	T	C	No
	37085045	397	A	G	Yes	Thr133Ala
	37087869	975	G	A	No
	37087893	999	T	C	No
TraesCS2A02G082200.1	37089682	275	T	C	Yes	Met92Thr	Arogenate dehydratase/prephenate dehydratase 2, chloroplastic
	37090721	723	T	C	No
	37091413	1029	T	C	No
TraesCS2A02G082300							TPD1 protein homolog 1A
TraesCS2A02G082400.1	37217235	369	T	G	No		Protein PARTING DANCERS homolog
	37217425	286	A	G	Yes	Cys96Arg
	37218029	14	T	A	Yes	Glu5Val
TraesCS2A02G082500.1	37269966	501	T	C	No		Probable glucuronosyltransferase Os03g0287800
	37270765	696	G	C	No
	37270774	705	G	T	Yes	Glu235As
	37270854	785	G	A	Yes	Gly262As
TraesCS2A02G082600.1	37276590	105	C	G	No		Probable glucuronosyltransferase Os03g0287800
TraesCS2A02G082700							Unknow
TraesCS2A02G082800.1	37949349	9	C	G	No		Unknow
	37949351	11	T	A	Yes	Met4Lys
	37949356	16	T	C	Yes	Ser6Pro
	37949358	18	A	G	No
TraesCS2A02G082900.1	37969507	73	G	A	Yes	Val25Ile	F-box/LRR-repeat protein 13
	37969540	106	C	A	No
	37969600	169_171	AAG	-	Yes	Lys57del
	37969665	231	A	G	No
	37969819	385	G	A	Yes	Glu129Lys
	37969998	564	A	C	No
	37970001	567	G	C	Yes	Glu189As
	37970311	877	G	A	Yes	Val293Ile
	37970331	897	G	A	No
	37970352	918	C	G	Yes	As306Glu
	37970389	955	C	G	Yes	Leu319Val
	37970397	963	G	A	No
	37970456	1022	A	T	Yes	Lys341Met
	37970859	1175	A	T	Yes	Gln392Leu
TraesCS2A02G083000.1	38218347	168	T	C	No		Elongation factor 1-alpha
	38218416	237	A	G	No
	38219573	837	C	T	No
	38219837	1101	C	T	No
	38220002	1266	C	T	No
	38220020	1284	T	C	No
	38220044	1308	T	C	No
